# Supplementary material
Source: PubMed Central journal article supplement (PMC3105668)
Supplement: ismej201097x1.pdf [file ismej201097x1.pdf]

## SUPPLEMENTAL MATERIAL

### SUPPLEMENTAL METHODS

#### Overview

Below is a detailed account of sample preparation, mass spectrometry analysis and data analysis utilized in this study. Briefly, bacterial samples were collected from a hindgut compartment of 200 termites. Two different P3 gut fluid preparations were utilized to try to identify as many proteins as possible by mass spectrometry analysis. Sample preparation 1 was used to create global, soluble and insoluble protein samples from the hindgut fluid-bacteria samples. In sample preparation 2 the hindgut fluid and bacteria were separated to create supernatant and pellet samples, respectively. Proteins were tryptically digested and the resulting peptides were fractionated by SCX resin. The resulting fractions were analyzed by tandem MS on LTQ and Orbitrap mass spectrometers (Thermo Electron Corporation, San Jose, CA). Proteins were identified by  $\geq 2$  peptides following Sequest searches and data filtering.

#### 1.0 - Termites

Worker specimens of the higher termite *Nasutitermes corniger* were collected from a laboratory-kept colony (Rudolf Scheffrahn Lab, University of Florida, Fort Lauderdale, FL). These termites were kept in a laboratory prior to analysis. When collecting gut fluid from the third proctodeal (P3) segment only free floating bacteria, not bacteria attached to the P3 epithelium, were included in the analysis. Microbial communities associated with other hindgut compartments were not sampled. Laboratory-kept termites were fed wood of *Schinus terebinthifolius* or "Brazilian pepper" *ad libitum*. This woody shrub is an invasive weed and was also the primary food source for the *N. corniger* colonies collected in the field in Dania Beach, Florida. Therefore, lab nutrition was similar to that of the field. Water was supplied by adding wet cellulose sponges that were also consumed. Colonies were transferred whole to lab cages so the only changes to the field are restricted foraging area and field weather (rainfall and temperature). The colony used in this study has been kept in the lab since April 2004.

#### Sample Preparation

Two different P3 gut fluid preparations were utilized to try to maximize identification of proteins by mass spectrometry analysis. Sample preparation 1 identified 465 proteins and sample preparation 2 identified 763 proteins. These complementary techniques identified a total of 886 unique proteins; 342 proteins were found in both sample preparation 1 & 2, 123 unique proteins were found only in sample preparation 1, and 421 unique proteins were found only in sample preparation 2.

#### 2.0 - Sample Preparation 1 (Global, Soluble and Insoluble)

**Section 2.1: Cell Lysis and Separation:** Sample preparation 1 created the global, soluble and insoluble samples. Bacteria (collected from 100 termites) were lysed in the gut fluid by adding 0.1 mm Zirconia/Silica beads to the top of the a 0.6mL siliconized eppendorf tube and bead beat at maximum speed for 3 minutes and immediately placed on ice. A hole was poked in the base of the 0.6mL tube and placed in a 1.5mL siliconized eppendorf tube. The sample was then centrifuged for 5 minutes at 14,000 rpm at 4°C. The cell lysate was mixed to a homogenized state and the volume was determined using a pipette. The sample concentration was determined with a Coomassie Protein Assay (Pierce, Rockford IL)

and read on a microplate reader. One third of the sample was aliquoted and digested as the global sample as per Section 2. Two thirds of the sample was transferred into an ultracentrifuge tube and ultracentrifuged at 100,000 rpm for 10 minutes at 4°C (the supernatant from this spin was retained and protein concentration determined by a Coomassie assay and prepared as per Section 2 as the soluble sample). The pellet was resuspended (using sonication with ice) in 100µl 100mM NH<sub>4</sub>HCO<sub>3</sub>, pH 8.4 and a bicinchoninic acid assay (BCA) (Pierce, Rockford IL) was performed to determine approximate protein concentration. The mass of protein in the sample was calculated in µg. The sample was ultracentrifuged again at 100,000 rpm for 10 min at 4°C and the supernatant was removed and the pellet digested as per Section 2.3 as the insoluble sample.

**Section 2.2: Global/soluble digestions:** Urea was added to the sample to a target concentration of 7M. Thiourea was added to a target concentration of 2M. An appropriate volume of a 50mM solution of dithiothreitol was added to the sample to reach a concentration of 5mM. The sample was incubated at 60°C for 30 minutes and was then diluted 10-fold with 100 mM NH<sub>4</sub>HCO<sub>3</sub> to reduce the salt concentration. A sufficient amount of a 1M solution of CaCl<sub>2</sub> was added to obtain a sample concentration of 1 mM CaCl<sub>2</sub>. The samples were digested for 3 hours with trypsin (Promega, Madison WI) at 37°C at a concentration of 1 unit trypsin/50 units protein. After trypsin incubation, the samples were snap frozen and placed in a -80°C freezer overnight. Samples were then cleaned up using a 1 mL/100 mg C18 SPE column using the following steps: Conditioned column with 3 mL of MeOH then rinsed the column with 2 mL acidified water (0.1% TFA). The sample solution was slowly passed through the column then the column containing the sample was washed with 4 mL of 95:5 H<sub>2</sub>O:ACN, 0.1% TFA. Collection tubes were placed under the column and while tubes were closed off from vacuum, 1 mL of 80:20 ACN:H<sub>2</sub>O, 0.1% TFA was added. The elution buffer flowed slowly through the column until dry. The sample was removed from SPE vacuum chamber and concentrated in a speed-vac to a volume of 50µL. A sufficient amount of 25 mM NH<sub>4</sub>HCO<sub>3</sub> was added to dissolve any particulate matter on the tube sides, and a BCA assay was performed on the sample to determine the final concentration.

**Section 2.3: Insoluble digestion:** Pellets were resuspended in 100µL of a solubilization solution (7M urea, 2M thiourea, 1% CHAPS in 50mM NH<sub>4</sub>HCO<sub>3</sub>, pH 7.8) and DTT was added to a final concentration of 9.7mM and incubated at 60°C for 30 min. The sample was diluted 10-fold with 50mM NH<sub>4</sub>HCO<sub>3</sub>, pH 7.8 to reduce the salt concentration. 1M CaCl<sub>2</sub> was added to obtain a final concentration of 1mM CaCl<sub>2</sub> and the sample was digested for 3 hours with trypsin at 37°C at a concentration of 1 unit trypsin/50 units protein. After incubation, samples were cleaned using an appropriately sized strong cation exchange (SCX) SPE column (Supelco). Each 1-mL, 100mg column was conditioned with MeOH, rinsed in varying sequences and amounts with 10mM ammonium formate in 25% ACN, pH 3.0, 500mM ammonium formate in 25% ACN, and nanopure water. Samples were acidified to a pH of 4.0 by adding 20% formic acid followed by centrifugation at 16,000 x g for 5 min. Samples were then introduced to the columns and washed with 10mM ammonium formate in 25% ACN, pH 3.0. Excess liquid was removed from the columns under vacuum. Peptides were eluted with 80:15:5 MeOH:H<sub>2</sub>O:NH<sub>4</sub>OH and concentrated to ~100µL using a SpeedVac. Final peptide concentrations were determined using a BCA protein assay.

### 3.0 - Sample Preparation 2 (Supernatant 1, Supernatant 2 and Pellet)

In order to reduce contamination observed from digestion in the termite gut fluid, sample preparation 2 created the pellet and supernatant samples. Bacteria in gut fluid (collected from 100 termites) were spun down at 5,000 rpm for 5 minutes. The supernatant was collected. The pellet was washed with 100 mM ammonium bicarbonate. The resulting supernatant was added to the initial supernatant sample. Bead-beating was used to lyse the bacterial pellet and the standard global digestion was performed (see section 2 above) with the amendment of the addition of 1% Triton-X added during the reduction/denaturing step to aid in solubilization of the pellet. The supernatant was digested separately via the standard global SOP

(with no Triton-X amendment) in order to reduce possible sample loss. Half of this supernatant sample was run with only C18 cleanup (supernatant 1) (as described in Section 2 above) and the other half had a SCX clean up after the C18 clean up (supernatant 2) (as described in Section 3 above). Soluble, insoluble, supernatant and pellet samples were fractionated into 25, 25, 10 (5 supernatant 1 & 5 supernatant 2), and 22 by SCX, respectively.

#### 4.0 – SCX Fractionation

**4.1 - Sample Preparation 1 (global, soluble, insoluble) SCX fractionation:** Tryptic peptides were resuspended in 900 $\mu$ L of 10mM ammonium formate (pH 3.0)/25% ACN and fractionated by SCX chromatography on a Polysulfoethyl 2.1 mm x 200 mm, 5 $\mu$ m particle size column (PolyLC, Columbia, MD) that was preceded by a 2.1 mm, 10 mm guard column on an Agilent 1100 system (Agilent, Palo Alto, CA) that was equipped with a quaternary pump, degasser, diode array detector, and Peltier-cooled autosampler and fraction collector (both set at 4 °C). The mobile phases consisted of 10 mM ammonium formate, 25% ACN, pH 3.0 (A) and 500 mM ammonium formate, 25% ACN, pH 6.8 (B). The gradient consisted of maintaining mobile phase A at 100% for the first 10 min and then increasing mobile phase B from 0 to 50% over the next 40 min and from 50 to 100% over the following 10 min before sustaining 100% mobile phase B for a final 10 min. A flow rate of 0.2 ml min<sup>-1</sup> was maintained throughout the gradient. Spectra were obtained at 280 nm, and fractions were collected over the initial 70 min of the gradient. A total of 25 fractions were collected for each separation. Each fraction was dried under vacuum. The fractions were dissolved in 30 $\mu$ L of 25mM NH<sub>4</sub>HCO<sub>3</sub> and 10 $\mu$ L of each fraction were analyzed by capillary LC-MS/MS.

#### 4.2 - Sample Preparation 2 (pellet, supernatant 1 and supernatant 2) SCX fractionation:

**4.2.1 Pellet SCX fractionation:** Tryptic peptides were resuspended in 900 $\mu$ L of 10mM ammonium formate (pH 3.0)/25% ACN and fractionated by SCX chromatography as described in section 4.1. However a total of 35 fractions were collected and 22 were selected for analysis according to the spectra. Each fraction was dried under vacuum. The fractions were dissolved in 30 $\mu$ L of 25mM NH<sub>4</sub>HCO<sub>3</sub> and 10 $\mu$ L of each fraction were analyzed by capillary LC-MS/MS.

**4.2.2 Supernatant 1 and Supernatant 2 SCX Fractionation:** Tryptic peptides were resuspended in 900 $\mu$ L of 10mM ammonium formate (pH 3.0)/25% ACN and fractionated by SCX chromatography as described in section 3.1., however a smaller column was used to accommodate the smaller sample mass. The column was Polysulfoethyl 2.1 mm x 35 mm, 3 $\mu$ m particle size column (PolyLC, Columbia, MD) that was preceded by a 2.1 mm, 10 mm guard column. A total of 22 fractions were collected and 5 were selected for analysis according to the spectra. The fractions were dissolved in 30 $\mu$ L of 25mM NH<sub>4</sub>HCO<sub>3</sub> and 10 $\mu$ L of each fraction were analyzed by capillary LC-MS/MS.

#### 5.0 – Mass Spectrometry Analyses

The unfractionated form of the global, soluble, insoluble, supernatant and pellet samples were analyzed by tandem MS on an Orbitrap (Thermo Electron Corporation, San Jose, CA). The fractionated form of the soluble, insoluble, supernatant and pellet was analyzed by tandem MS on a LTQ (Thermo Electron Corporation, San Jose, CA). Columns (60 cm long / 75  $\mu$ m ID) were packed with Jupiter 3  $\mu$ m C18 resin (phenomenex; Torrance, California, USA). Liquid chromatography systems parameters; constant pressure of 10,000 PSI, exponential gradient, and a flow rate 500 nL/min (Livesay *et al.*, 2008). MS parameters; capillary voltage 2.2 kV, Collision energy 35 eV, exclusion time 1 min, 10 most intense peaks selected for fragmentation (LTQ), 6 most intense peaks selected for fragmentation (Orbitrap).

## 6.0 – Data Analysis

We used Sequest to search the tandem mass spectrometry data against a representative termite database ([Termite Gut (version 3)] <http://www.jgi.doe.gov/>).

**6.0.1 Metagenomic Data:** This representative termite database was created from a nest of an arboreal species closely related to *Nasutitermes ephrate* and *N. corniger* collected near Guápiles, Costa Rica. This database was annotated as previously described (Warnecke *et al.*, 2007). All of our protein identifications were based only on these previous annotations. The Termite Gut (version 3) fasta file used in this study contained 72,401 potential proteins.

**6.0.2 Metaproteomic Data:** Termites were collected in Dania Beach, Florida (Scheffrahn *et al.*, 2002; Scheffrahn *et al.*, 2005) and whole colonies transported to the Scheffrahn laboratory. This laboratory-kept colony was used for our proteomic analyses (see supplemental section 1.0- Termites for details on this captive colony).

It is important to note, protein and DNA samples from these termites were obtained from different termite nests. As a future direction we plan on searching our proteomic data against a metagenome dataset for the same (laboratory-kept) termite.

## 7.0 – Data Filtering

Data Filtering was manually performed in Microsoft Access. We set our XCorr cutoff values to be greater than or equal to 1.9, 2.2 and 3.75 for peptide charge states of +1, +2 and +3, respectively. We looked at both Tryptic and partial-Tryptic peptides. We required a Minimum peptide length of 6 residues. DelCN values were varied for each charge state to obtain a 10% peptide False Discovery Rate (FDR). For example, to achieve a 10% FDR, DelCN values were set at  $\geq 0.101$  (+1), 0.14 (+2), & 0.09 (+3) for the supernatant fractions and  $\geq 0.132$  (+1), 0.157 (+2), 0.09 (+3) for the pellet fractions. For each protein at least 2 peptides had to be detected. When a 1% FDR was applied to a subset of our data it reduced the redundancy of proteins observed, but did not change the main metabolic pathways observed (**Supplemental Table 5**). As a control the supernatant and pellet data was searched against the drosophillia database. Searching against this nonrepresentative database resulted in 29 supernatant protein identifications ( $\geq 2$  peptides) and 38 pellet protein identifications ( $\geq 2$  peptides) utilizing a 10% FDR filter. The JGI website was used to obtain information on the COGs, pfams, EC numbers and TIGR Families for each identified protein. Analysis of the global, soluble, insoluble, supernatant and pellet samples identified 1295, 1877, 399, 2267 and 3582 unique peptides and 226, 322, 71, 402 and 626 proteins ( $\geq 2$  peptides), respectively.

Livesay EA, Tang KQ, Taylor BK, Buschbach MA, Hopkins DF, LaMarche BL *et al* (2008). Fully automated four-column capillary LC-MS system for maximizing throughput in proteomic analyses. *Analytical Chemistry* **80**: 294-302.

Scheffrahn RH, Cabrera BJ, Kern WH, Su N-Y (2002). *Nasutitermes costalis* (Isoptera: Termitidae) in Florida: First Record of a Non-Endemic Establishment by a Higher Termite. *Florida Entomologist* **85**: 273-275.

Scheffrahn RH, Krecek J, Szalanski AL, Austin JW, Roisin Y (2005). Synonymy of Two Arboreal Termites (Isoptera: Termitidae: Nasutitermitinae): *Nasutitermes corniger* from the Neotropics and *N. polygynus* from New Guinea. *The Florida Entomologist* **88**: 28-33

Warnecke F, Luginbuhl P, Ivanova N, Ghassemian M, Richardson TH, Stege JT *et al* (2007). Metagenomic and functional analysis of hindgut microbiota of a wood-feeding higher termite. *Nature* **450**: 560-565.

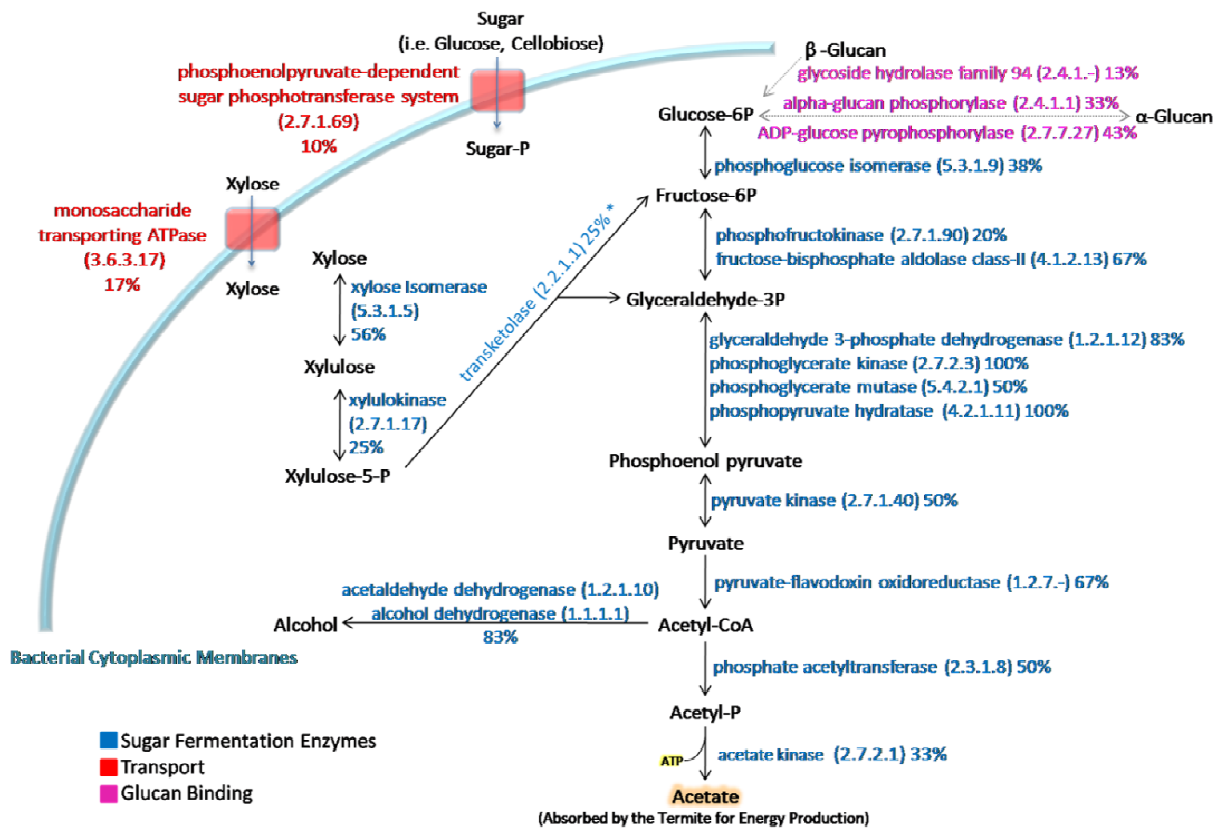

## Supplemental Figure 1.

**Supplemental Figure 1. Sugar Fermentation Enzymes Identified from the Metaproteomic Analysis**

Depicted in red are enzymes involved in the active transport of sugars into the bacterial cytoplasm. To gain insight into the depth of our metaproteomic analysis, this figure contains how many enzymes were identified vs. how many possible genes were previously identified based on the metagenomic sequence. Only proteins and genes which are annotated with EC numbers were included in this figure. On average, for these enzymes related to glycolysis, 46% of all possible genes were identified as expressed proteins with percentages ranging from 10% to 100%. See Supplemental table 1 for details.

## Supplemental Table 1. Other Enzymes

### Enzymes Related to Glycolysis

|                                                                                   | Enzyme Classification (Proteomic <sup>S</sup> /Genomic) <sup>‡</sup> | Pfam HMM name (Accession Number)                                                        | TIGR                | COG                |
|-----------------------------------------------------------------------------------|----------------------------------------------------------------------|-----------------------------------------------------------------------------------------|---------------------|--------------------|
| Xylose Isomerase                                                                  | EC:5.3.1.5 (5/9)                                                     | AP_endonuc_2 (PF01261)                                                                  | TIGR02630           | COG2115            |
| Xylulokinase                                                                      | EC:2.7.1.17 (1/4)                                                    | FGGY_N (PF00370) & FGGY_C (PF02782)                                                     | TIGR01312           | COG1070            |
| Phosphoglucose Isomerase (Glucose-6-phosphate isomerase)                          | EC:5.3.1.9 (3/8)                                                     | PGI (PF00342)                                                                           |                     | COG0166            |
| 6-Phosphofructokinase                                                             | EC:2.7.1.90 (1/5)                                                    | PFK (PF00365)                                                                           |                     | COG0205            |
| Fructose-bisphosphate aldolase class-II (Fructose/tagatose bisphosphate aldolase) | EC:4.1.2.13 (2/3)                                                    | F_bP_aldolase (PF01116)                                                                 | TIGR00167 TIGR01859 | COG0191            |
| Glyceraldehyde 3-phosphate dehydrogenase                                          | EC:1.2.1.12 (5/6)                                                    | Gp_dh_N (PF00044) & Gp_dh_C (PF02800)                                                   | TIGR01534           | COG0057            |
| Phosphoglycerate kinase                                                           | EC:2.7.2.3 (8/8)                                                     | PGK (PF00162)                                                                           |                     | COG0126            |
| Phosphoglycerate mutase                                                           | EC:5.4.2.1 (1/2)                                                     | Metalloenzyme (PF01676) & iPGM_N (PF06415)                                              |                     | COG0696            |
| Phosphopyruvate hydratase (Enolase)                                               | EC:4.2.1.11 (7/7)                                                    | Enolase_C (PF00113) & Enolase_N (PF03952)                                               | TIGR01060           | COG0148            |
| Pyruvate kinase                                                                   | EC:2.7.1.40 (3/6)                                                    | PK (PF00224) & PK_C (PF02887)                                                           | TIGR01064           | COG0469            |
| pyruvate:ferredoxin (flavodoxin) oxidoreductase                                   | EC:1.2.7.- (4/6)                                                     | Fer4 (PF00037), POR (PF01558), POR_N (PF01855), TPP_enzyme_C (PF02775), & EKR (PF10371) | TIGR02176           | COG0674<br>COG1013 |
| Phosphate acetyltransferase                                                       | EC:2.3.1.8 (1/2)                                                     | PTA_PTB (PF01515)                                                                       | TIGR00651           | COG0280            |
| Acetate kinase                                                                    | EC:2.7.2.1 (2/6)                                                     | Acetate_kinase (PF00871)                                                                | TIGR00016           | COG0282            |
| Acetaldehyde dehydrogenase & Alcohol dehydrogenase                                | EC:1.2.1.10 & EC:1.1.1.1 (5/6)                                       | Fe-ADH (PF00465)                                                                        |                     | COG1454            |
| Triose-phosphate isomerase                                                        | EC:5.3.1.1 (3/18)                                                    | TIM (PF00121)                                                                           | TIGR00419           | COG0149            |
| <b>(Pentose Phosphate Pathway)</b>                                                |                                                                      |                                                                                         |                     |                    |
| Gluconokinase <sup>^</sup>                                                        | EC:2.7.1.12 (1)                                                      | FGGY_N (PF00370) & FGGY_C (PF02782)                                                     |                     | COG1070            |
| Ribose 5-phosphate isomerase <sup>^</sup>                                         | EC:5.3.1.6 (1)                                                       | Rib_5-P_isom_A (PF06026)                                                                | TIGR00021           | COG0120            |
| Transketolase                                                                     | EC:2.2.1.1 (2) [(1/4) for proteins which contain all 3 pfam domains] | Transketolase_N (PF00456), Transketolase_C (PF02780), & Transket_pyr (PF02779)          | TIGR00232           | COG0021            |
| 2-dehydro-3-deoxygluconokinase <sup>^</sup>                                       | EC:2.7.1.45 (2)                                                      | PfkB (PF00294)                                                                          |                     | COG0524            |

**(Gluconeogenesis)**

|                              |                |                                                                                 |           |         |
|------------------------------|----------------|---------------------------------------------------------------------------------|-----------|---------|
| Pyruvate, phosphate dikinase | EC:2.7.9.1 (2) | PEP-utilizers (PF00391),<br>PPDK_N (PF01326), &<br>PEP-utilizers_C<br>(PF02896) | TIGR01828 | COG0574 |
|------------------------------|----------------|---------------------------------------------------------------------------------|-----------|---------|

***Enzymes Related to Fumarate Respiration***

|                                                               | <b>Enzyme Classification (Proteomic)<sup>§</sup></b> | <b>Pfam HMM name (Accession Number)</b>                                     | <b>TIGR</b> | <b>COG</b> |
|---------------------------------------------------------------|------------------------------------------------------|-----------------------------------------------------------------------------|-------------|------------|
| NADH dehydrogenase (ubiquinone/quinone)                       | EC:1.6.5.3 (5) & EC:1.6.99.5 (4)                     | Complex1_51K<br>(PF01512), SLBB<br>(PF10531), &<br>NADH_4Fe-4S<br>(PF10589) |             | COG1894    |
| NADH dehydrogenase (ubiquinone)                               | EC:1.6.5.3 (1)                                       | -                                                                           | -           | COG3411    |
| Succinate dehydrogenase                                       | EC:1.3.99.1 (1)                                      | Fer4 (PF00037)                                                              | TIGR00384   | COG0479    |
| Succinate dehydrogenase                                       | EC:1.3.99.1 (1)                                      | FAD_binding_2<br>(PF00890) &<br>Succ_DH_flav_C<br>(PF02910)                 | TIGR01811   | COG1053    |
| Succinate-semialdehyde dehydrogenase (NAD(P)(+)) <sup>^</sup> | EC:1.2.1.16 (1)                                      | pfam00171                                                                   |             | COG1012    |

***ATPases & associated Enzymes***

|                                                          |                  |                                                       |  |                               |
|----------------------------------------------------------|------------------|-------------------------------------------------------|--|-------------------------------|
| H(+)-transporting two-sector ATPase (subunits A, B, & E) | EC:3.6.3.14 (13) | ATP-synt_ab (PF00006)<br>& ATP-synt_ab_N<br>(PF02874) |  | COG1155<br>COG1156<br>COG1390 |
| Na(+)-transporting two-sector ATPase                     | EC:3.6.3.15 (2)  | ATP-synt_ab (PF00006)<br>& ATP-synt_ab_N<br>(PF02874) |  | COG1129                       |
| Inorganic H <sup>+</sup> pyrophosphatase                 | EC:3.6.1.1 (2)   | H_PPase (PF03030) &<br>DHHA2 (PF02833)                |  | COG3808<br>COG1227            |

***Hydrogenases***

|                       | <b>Enzyme Classification (Proteomic)<sup>§</sup></b> | <b>Pfam HMM name (Accession Number)</b>                                                                                                  | <b>TIGR</b> | <b>COG</b> |
|-----------------------|------------------------------------------------------|------------------------------------------------------------------------------------------------------------------------------------------|-------------|------------|
| Hydrogenases, Fe-only | EC:1.6.5.3 (5)                                       | Fer4 (PF00037), Fer2<br>(PF00111), Fe_hyd_Ssu<br>(PF02256),<br><b>Fe_hyd_lg_C</b><br>( <b>PF02906</b> ), & NADH-<br>G_4Fe-4S_3 (PF10588) | TIGR02512   | COG4624    |

***Nitrogen (N<sub>2</sub>) fixation to NH<sub>3</sub>***

|             | <b>Enzyme Classification (Proteomic)<sup>§</sup></b> | <b>Pfam HMM name (Accession Number)</b>              | <b>TIGR</b>                      | <b>COG</b>         |
|-------------|------------------------------------------------------|------------------------------------------------------|----------------------------------|--------------------|
| Nitrogenase | EC:1.18.6.1 (3)                                      | Oxidored_nitro<br>(PF00148) & Fer4_NifH<br>(PF00142) | TIGR01282, TIGR01862 & TIGR01287 | COG2710<br>COG1348 |

***Nitrogen Metabolism & amino acid synthesis (Glu, Gln, Asp, Arg)***

|                           |                |                      |  |         |
|---------------------------|----------------|----------------------|--|---------|
| Glutamate--ammonia ligase | EC:6.3.1.2 (1) | Gln-synt_C (PF00120) |  | COG3968 |
|---------------------------|----------------|----------------------|--|---------|

|                                   |                 |                                                                 |                      |
|-----------------------------------|-----------------|-----------------------------------------------------------------|----------------------|
| Glutamate synthase (NADPH)        | EC:1.4.1.13 (4) | Fer4 (PF00037),<br>Glu_synthase (PF01645),<br>& GXGXG (PF01493) | COG0069<br>COG0070   |
| Glutamate dehydrogenase (NADP(+)) | EC:1.4.1.4 (4)  | ELFV_dehydrog<br>(PF00208) &<br>ELFV_dehydrog_N<br>(PF02812)    | COG0334              |
| Carbonate dehydratase^            | EC:4.2.1.1 (1)  | Pro_CA (PF00484)                                                | COG0288              |
| Aspartate aminotransferase        | EC:2.6.1.1 (1)  | Aminotran_1_2<br>(PF00155)                                      | COG0436              |
| Argininosuccinate synthase        | EC:6.3.4.5 (2)  | Arginosuc_synth<br>(PF00764)                                    | TIGR00032<br>COG0137 |

***Pyruvate Metabolism & amino acid synthesis***

|                                         |                 |                                                                             |                      |
|-----------------------------------------|-----------------|-----------------------------------------------------------------------------|----------------------|
| Phosphoenolpyruvate carboxykinase (GTP) | EC:4.1.1.32 (3) | PEPCK (PF00821)                                                             | COG1274              |
| Oxaloacetate decarboxylase              | EC:4.1.1.3 (3)  | Biotin_lipoyl (PF00364),<br>HMGL-like (PF00682),<br>& PYC OADA<br>(PF02436) | TIGR01108<br>COG5016 |
| Acetyl-CoA carboxylase                  | EC:6.4.1.2 (1)  | Carboxyl_trans<br>(PF01039)                                                 | TIGR00515<br>COG0777 |
| Lactoylglutathione lyase^               | EC:4.4.1.5 (1)  | Glyoxalase (PF00903)                                                        | TIGR03081<br>COG3185 |

(Val, Leu & Ile)

|                              |                 |                                                                                          |                      |
|------------------------------|-----------------|------------------------------------------------------------------------------------------|----------------------|
| Acetolactate synthase        | EC:2.2.1.6 (1)  | ACT (PF01842)                                                                            | COG4747              |
| Ketol-acid reductoisomerase^ | EC:1.1.1.86 (5) | IlvC (PF01450), IlvN<br>(PF07991), &<br>F420_oxidored<br>(PF03807)                       | TIGR00465<br>COG0059 |
| Butyryl-CoA dehydrogenase^   | EC:1.3.99.2 (1) | Acyl-CoA_dh_1<br>(PF00441), Acyl-<br>CoA_dh_M (PF02770),<br>& Acyl-CoA_dh_N<br>(PF02771) | COG1960              |

(Ala)

|                       |                 |                                                        |                      |
|-----------------------|-----------------|--------------------------------------------------------|----------------------|
| Alanine dehydrogenase | EC:1.4.1.1 (3)  | AlaDh_PNT_C<br>(PF01262) &<br>AlaDh_PNT_N<br>(PF05222) | TIGR00518<br>COG0686 |
| Selenocysteine lyase  | EC:4.4.1.16 (1) | Aminotran_5 (PF00266)                                  | TIGR01979<br>COG0520 |

(Cys)

|                   |                 |                |                                |
|-------------------|-----------------|----------------|--------------------------------|
| Cysteine synthase | EC:2.5.1.47 (1) | PALP (PF00291) | TIGR01139 TIGR01136<br>COG0031 |
|-------------------|-----------------|----------------|--------------------------------|

(Ser)

|                             |                 |                       |                      |
|-----------------------------|-----------------|-----------------------|----------------------|
| Phosphoserine transaminase^ | EC:2.6.1.52 (1) | Aminotran_5 (PF00266) | TIGR01364<br>COG1932 |
|-----------------------------|-----------------|-----------------------|----------------------|



|                                                  |                 |                                                                                   |           |         |
|--------------------------------------------------|-----------------|-----------------------------------------------------------------------------------|-----------|---------|
| Phosphoglycerate dehydrogenase^                  | EC:1.1.1.95 (2) | 2-Hacid_dh_C (PF02826)                                                            |           | COG0111 |
| (Met)                                            |                 |                                                                                   |           |         |
| O-acetylhomoserine aminocarboxypropyltransferase | EC:2.5.1.49 (2) | Cys_Met_Meta_PP (PF01053)                                                         | TIGR01326 | COG2873 |
| Methionine synthase                              | EC:2.1.1.13 (1) | B12-binding (PF02310) & B12-binding_2 (PF02607)                                   | TIGR02370 | COG5012 |
| Methionine adenosyltransferase                   | EC:2.5.1.6 (1)  | S-AdoMet_synt_N (PF00438), S-AdoMet_synt_M (PF02772), & S-AdoMet_synt_C (PF02773) | TIGR01034 | COG0192 |
| Argininosuccinate synthase                       | EC:6.3.4.5 (2)  | Arginosuc_synt (PF00764)                                                          | TIGR00032 | COG0137 |
| Adenosylhomocysteinase^                          | EC:3.3.1.1 (1)  | 2-Hacid_dh_C (PF02826) & AdoHcyase (PF05221)                                      | TIGR00936 | COG0499 |
| (Trp, Tyr & Phe)                                 |                 |                                                                                   |           |         |
| 3-deoxy-7-phosphoheptulonate synthase^           | EC:2.5.1.54 (1) | DAHP_synt_1 (PF00793)                                                             | TIGR01361 | COG2876 |
| Chorismate synthase^                             | EC:4.2.3.5 (1)  | Chorismate_synt (PF01264)                                                         | TIGR00033 | COG0082 |
| Phenylacetate-CoA ligase^                        | EC:6.2.1.30 (1) | AMP-binding (PF00501)                                                             |           | COG0441 |
| (Gly)                                            |                 |                                                                                   |           |         |
| Glycine--tRNA ligase^                            | EC:6.1.1.14 (2) | tRNA-synt_2b (PF00587) & HGTP_anticodon (PF03129)                                 | TIGR00389 | COG0423 |
| (Thr)                                            |                 |                                                                                   |           |         |
| Threonine--tRNA ligase^                          | EC:6.1.1.3 (2)  | tRNA-synt_2b (PF00587) HGTP_anticodon (PF03129), & tRNA_SAD (PF07973)             | TIGR00418 | COG0441 |
| <b>Fatty Acid Biosynthesis</b>                   |                 |                                                                                   |           |         |
| [Acyl-carrier-protein] S-malonyltransferase      | EC:2.3.1.39 (2) | Acyl_transf_1 (PF00698)                                                           | TIGR00128 | COG0331 |
| <b>Lipopolysaccharide Biosynthesis</b>           |                 |                                                                                   |           |         |
| UDP-2,3-diacetylglucosamine hydrolase            | EC:3.6.1.- (5)  |                                                                                   |           |         |

*Purine / Pyrimidine Metabolism*

|                                                                        |                |                                                                                                                                                                                              |                     |                    |
|------------------------------------------------------------------------|----------------|----------------------------------------------------------------------------------------------------------------------------------------------------------------------------------------------|---------------------|--------------------|
| Phosphoribosylaminoimidazolecarboxamide formyltransferase <sup>^</sup> | EC:2.1.2.3 (2) | AICARFT_IMPCHas<br>(PF01808), MGS<br>(PF02142)                                                                                                                                               | TIGR00355           | COG0138            |
| Adenylate kinase <sup>^</sup>                                          | EC:2.7.4.3 (1) | ADK (PF00406)                                                                                                                                                                                | TIGR01351           | COG0563            |
| Nucleoside-diphosphate kinase <sup>^</sup>                             | EC:2.7.4.6 (1) | NDK (PF00334)                                                                                                                                                                                |                     | COG0105            |
| DNA-directed RNA polymerase ( $\alpha$ & $\beta$ ) <sup>^</sup>        | EC:2.7.7.6 (4) | RNA_pol_A_bac<br>(PF01000),<br>RNA_pol_A_CTD<br>(PF03118),<br>RNA_pol_Rpb2_6<br>(PF00562),<br>RNA_pol_Rpb2_2<br>(PF04561),<br>RNA_pol_Rpb2_3<br>(PF04565), &<br>RNA_pol_Rpb2_45<br>(PF10385) | TIGR02027 TIGR02013 | COG0202<br>COG0085 |
| DNA-directed DNA polymerase <sup>^</sup>                               | EC:2.7.7.7 (1) | DNA_pol3_beta<br>(PF00712) &<br>DNA_pol3_beta_2<br>(PF02767)                                                                                                                                 | TIGR00663           | COG0592            |
| Polyribonucleotide nucleotidyltransferase <sup>^</sup>                 | EC:2.7.7.8 (3) | KH_1 (PF00013), S1<br>(PF00575) RNase_PH<br>(PF01138), RNase_PH_C<br>(PF03725), & PNPase<br>(PF03726)                                                                                        |                     | COG1185            |

\* All Proteins listed in this table contain an Enzyme Commission number (EC number)

§ Proteins identified which passed filtering criteria and have  $\geq 2$  peptides

‡ Proteins identified with this EC number / genes identified with this EC number is given for enzymes involved in glycolysis

<sup>^</sup>Enzymes with Incomplete Pathways (these are not listed in figure 2)

**Supplemental Table 2. Protein redundancy within the Termite P3 microbiome**

|    | <b>Product Name (inexact)*</b>                                                                      | <b>Count of Product Name</b> |
|----|-----------------------------------------------------------------------------------------------------|------------------------------|
| 1  | Unannotated                                                                                         | 70                           |
| 2  | Flagellin and related hook-associated proteins                                                      | 50                           |
| 3  | Methyl-accepting chemotaxis protein                                                                 | 43                           |
| 4  | ABC-type sugar transport system, periplasmic component                                              | 24                           |
| 5  | Pyruvate ferredoxin/ flavodoxin oxidoreductase*                                                     | 24                           |
| 6  | Phosphoenolpyruvate synthase/pyruvate phosphate dikinase                                            | 18                           |
| 7  | GTPases - translation elongation factors                                                            | 14                           |
| 8  | Archaeal/vacuolar-type H <sup>+</sup> -ATPase subunit A                                             | 13                           |
| 9  | Cytoplasmic filament protein A                                                                      | 13                           |
| 10 | Translation elongation factors (GTPases)                                                            | 13                           |
| 11 | Glucan phosphorylase (Alpha-glucan phosphorylase)*                                                  | 12                           |
| 12 | Glyceraldehyde-3-phosphate dehydrogenase/erythros e-4-phosphate dehydrogenase*                      | 12                           |
| 13 | ABC-type xylose transport system, periplasmic component                                             | 11                           |
| 14 | DNA-directed RNA polymerase, beta' subunit/160 kD subunit                                           | 11                           |
| 15 | Phosphoenolpyruvate carboxykinase (GTP)                                                             | 11                           |
| 16 | 3-phosphoglycerate kinase*                                                                          | 10                           |
| 17 | Chaperonin GroEL (HSP60 family)                                                                     | 10                           |
| 18 | DNA-directed RNA polymerase, beta subunit/140 kD subunit                                            | 9                            |
| 19 | Enolase (phosphopyruvate hydratase)*                                                                | 9                            |
| 20 | Molecular chaperone                                                                                 | 9                            |
| 21 | NADH dehydrogenase                                                                                  | 9                            |
| 22 | Triosephosphate isomerase                                                                           | 9                            |
| 23 | Chemotaxis protein histidine kinase and related kinases                                             | 8                            |
| 24 | Chemotaxis signal transduction protein                                                              | 8                            |
| 25 | Glucose-6-phosphate isomerase (phosphoglucose isomerase)*                                           | 8                            |
| 26 | Polyribonucleotide nucleotidyltransferase (polynucleotide phosphorylase)                            | 8                            |
| 27 | Pyruvate kinase*                                                                                    | 8                            |
| 28 | Uncharacterized protein related to glutamine synthetase                                             | 8                            |
| 29 | Fructose/tagatose bisphosphate aldolase*                                                            | 7                            |
| 30 | Glutamate synthase domain 2                                                                         | 7                            |
| 31 | Pyruvate/oxaloacetate carboxyltransferase                                                           | 7                            |
| 32 | Xylose isomerase*                                                                                   | 7                            |
| 33 | 6-phosphofructokinase*                                                                              | 6                            |
| 34 | ABC-type sugar transport systems, ATPase component*                                                 | 9                            |
| 35 | Acetate kinase*                                                                                     | 6                            |
| 36 | Archaeal/vacuolar-type H <sup>+</sup> -ATPase subunit E                                             | 6                            |
| 37 | Iron only hydrogenase large subunit, C-terminal domain                                              | 6                            |
| 38 | Ketol-acid reductoisomerase                                                                         | 6                            |
| 39 | Nitrogen regulatory protein PII                                                                     | 6                            |
| 40 | Ribosomal protein L7/L12                                                                            | 6                            |
| 41 | Rubryerythrin                                                                                       | 6                            |
| 42 | Archaeal/vacuolar-type H <sup>+</sup> -ATPase subunit B                                             | 5                            |
| 43 | Chemotaxis response regulator containing a CheY-like receiver domain and a methyltransferase domain | 5                            |
| 44 | Glutamate dehydrogenase/leucine dehydrogenase                                                       | 5                            |
| 45 | NAD-dependent aldehyde dehydrogenases                                                               | 5                            |
| 46 | Phosphotransacetylase (phosphate acetyltransferase)*                                                | 5                            |
| 47 | Uncharacterized conserved protein                                                                   | 5                            |
| 48 | ABC-type branched-chain amino acid transport systems, periplasmic component                         | 4                            |
| 49 | Alcohol dehydrogenase, class IV (acetaldehyde dehydrogenase & alcohol dehydrogenase)*               | 4                            |
| 50 | Ammonia permease                                                                                    | 4                            |
| 51 | Cellobiose phosphorylase (Glycoside Hydrolase Family 94)*                                           | 4                            |
| 52 | Co-chaperonin GroES (HSP10)                                                                         | 4                            |
| 53 | Flagellar filament outer layer protein                                                              | 4                            |

|     |                                                                                                                                             |   |
|-----|---------------------------------------------------------------------------------------------------------------------------------------------|---|
| 54  | FOG                                                                                                                                         | 4 |
| 55  | Hypothetical protein                                                                                                                        | 4 |
| 56  | Membrane protease subunits, stomatin/prohibitin homologs                                                                                    | 4 |
| 57  | Phosphoglyceromutase*                                                                                                                       | 4 |
| 58  | Ribosomal protein S2                                                                                                                        | 4 |
| 59  | Ribosomal protein S3                                                                                                                        | 4 |
| 60  | S-adenosylhomocysteine hydrolase                                                                                                            | 4 |
| 61  | Transcription elongation factor                                                                                                             | 4 |
| 62  | Transketolase*                                                                                                                              | 4 |
| 63  | Uncharacterized ABC-type transport system, periplasmic component/surface lipoprotein                                                        | 4 |
| 64  | Uncharacterized protein conserved in bacteria                                                                                               | 4 |
| 65  | 3-oxoacyl-(acyl-carrier-protein) synthase                                                                                                   | 3 |
| 66  | 4-alpha-glucanotransferase                                                                                                                  | 3 |
| 67  | ABC-type dipeptide transport system, periplasmic component                                                                                  | 3 |
| 68  | ABC-type phosphate transport system, periplasmic component                                                                                  | 3 |
| 69  | ADP-glucose pyrophosphorylase*                                                                                                              | 3 |
| 70  | AICAR transformylase/IMP cyclohydrolase PurH (only IMP cyclohydrolase domain in Aful)                                                       | 3 |
| 71  | Alanine dehydrogenase                                                                                                                       | 3 |
| 72  | Flagellar filament outer layer protein precursor (Sheath protein)                                                                           | 3 |
| 73  | Glycyl-tRNA synthetase (class II)                                                                                                           | 3 |
| 74  | Hypothetical protein TP0747                                                                                                                 | 3 |
| 75  | Major membrane protein I                                                                                                                    | 3 |
| 76  | Nitrogenase molybdenum-iron protein, alpha and beta chains                                                                                  | 3 |
| 77  | Outer membrane protein and related peptidoglycan-associated (lipo)proteins                                                                  | 3 |
| 78  | Phosphoserine aminotransferase                                                                                                              | 3 |
| 79  | Predicted inhibitor of MCP methylation, homolog of CheC                                                                                     | 3 |
| 80  | Putative sugar binding secreted protein                                                                                                     | 3 |
| 81  | Ribosomal protein L1                                                                                                                        | 3 |
| 82  | Ribosomal protein L5                                                                                                                        | 3 |
| 83  | (acyl-carrier-protein) S-malonyltransferase                                                                                                 | 2 |
| 84  | Actin-like ATPase involved in cell morphogenesis                                                                                            | 2 |
| 85  | Acyl-CoA dehydrogenases                                                                                                                     | 2 |
| 86  | Adenylate kinase and related kinases                                                                                                        | 2 |
| 87  | Aerobic-type carbon monoxide dehydrogenase, large subunit CoxL/CutL homologs                                                                | 2 |
| 88  | Alpha-L-arabinofuranosidase                                                                                                                 | 2 |
| 89  | Argininosuccinate synthase                                                                                                                  | 2 |
| 90  | ATP-dependent protease HslVU (ClpYQ), ATPase subunit                                                                                        | 2 |
| 91  | Carbonic anhydrase                                                                                                                          | 2 |
| 92  | Cation/multidrug efflux pump                                                                                                                | 2 |
| 93  | CO dehydrogenase/acetyl-CoA synthase beta subunit                                                                                           | 2 |
| 94  | CO dehydrogenase/acetyl-CoA synthase gamma subunit (corrinoid Fe-S protein)                                                                 | 2 |
| 95  | Cysteine synthase                                                                                                                           | 2 |
| 96  | DNA-directed RNA polymerase, alpha subunit/40 kD subunit                                                                                    | 2 |
| 97  | Exopolyphosphatase-related proteins                                                                                                         | 2 |
| 98  | Glycine/serine hydroxymethyltransferase                                                                                                     | 2 |
| 99  | Heterodisulfide reductase, subunit A and related polyferredoxins                                                                            | 2 |
| 100 | Hypothetical lipoprotein FN1899                                                                                                             | 2 |
| 101 | Methylmalonyl-CoA mutase, N-terminal domain/subunit                                                                                         | 2 |
| 102 | Mg-dependent DNase                                                                                                                          | 2 |
| 103 | Nitrogenase subunit NifH (ATPase)                                                                                                           | 2 |
| 104 | O-acetylhomoserine sulfhydrylase                                                                                                            | 2 |
| 105 | Phosphoglycerate dehydrogenase and related dehydrogenases                                                                                   | 2 |
| 106 | Phosphotransferase system mannitol/fructose-specific IIA domain (Ntr-type) (Phosphoenolpyruvate-dependent sugar phosphotransferase system)* | 2 |
| 107 | Predicted HD superfamily hydrolase                                                                                                          | 2 |

|     |                                                                            |   |
|-----|----------------------------------------------------------------------------|---|
| 108 | Predicted transcriptional regulators                                       | 2 |
| 109 | Preprotein translocase subunit SecD                                        | 2 |
| 110 | Protease subunit of ATP-dependent Clp proteases                            | 2 |
| 111 | Ribosomal protein L10                                                      | 2 |
| 112 | Ribosomal protein L15                                                      | 2 |
| 113 | Ribosomal protein L18                                                      | 2 |
| 114 | Ribosomal protein L22                                                      | 2 |
| 115 | Ribosomal protein L25 (general stress protein Ctc )                        | 2 |
| 116 | Ribosomal protein L3                                                       | 2 |
| 117 | Ribosomal protein S1                                                       | 2 |
| 118 | Ribosomal protein S10                                                      | 2 |
| 119 | Ribosomal protein S5                                                       | 2 |
| 120 | RNA-binding proteins (RRM domain)                                          | 2 |
| 121 | S-adenosylmethionine synthetase                                            | 2 |
| 122 | Signal transduction histidine kinase                                       | 2 |
| 123 | Succinate dehydrogenase/fumarate reductase, flavo protein subunit          | 2 |
| 124 | Sugar (pentulose and hexulose) kinases (xylulokinase)*                     | 2 |
| 125 | Sugar kinases, ribokinase family                                           | 2 |
| 126 | Threonyl-tRNA synthetase                                                   | 2 |
| 127 | Transcription antiterminator                                               | 2 |
| 128 | Transcription termination factor                                           | 2 |
| 129 | Uncharacterized flavoproteins                                              | 2 |
| 130 | 3 Superfamily II DNA and RNA helicases                                     | 1 |
| 131 | 3-deoxy-D-arabino-heptulosonate 7-phosphate (DAHP ) synthase               | 1 |
| 132 | 5'-nucleotidase/2',3'-cyclic phosphodiesterase and related esterases       | 1 |
| 133 | 6Fe-6S prismane cluster-containing protein                                 | 1 |
| 134 | 6-phosphogluconate dehydrogenase                                           | 1 |
| 135 | ABC-type oligopeptide transport system, ATPase component                   | 1 |
| 136 | ABC-type oligopeptide transport system, periplasmic component              | 1 |
| 137 | ABC-type phosphate transport system, ATPase component                      | 1 |
| 138 | Acetyl-CoA carboxylase beta subunit                                        | 1 |
| 139 | Acetyl-CoA hydrolase                                                       | 1 |
| 140 | ACT domain-containing protein                                              | 1 |
| 141 | Activator of 2-hydroxyglutaryl-CoA dehydratase (HSP70-class ATPase domain) | 1 |
| 142 | Acyl carrier protein                                                       | 1 |
| 143 | Acyl-CoA synthetase (NDP forming)                                          | 1 |
| 144 | Aspartate/tyrosine/aromatic aminotransferase                               | 1 |
| 145 | Aspartyl-tRNA synthetase                                                   | 1 |
| 146 | ATPases with chaperone activity, ATP-binding subunit                       | 1 |
| 147 | ATP-dependent protease Clp, ATPase subunit                                 | 1 |
| 148 | Beta-glucosidase-related glycosidases                                      | 1 |
| 149 | Carbon dioxide concentrating mechanism/carboxysome shell protein           | 1 |
| 150 | Chorismate synthase                                                        | 1 |
| 151 | Coenzyme F390 synthetase                                                   | 1 |
| 152 | Cysteine synthase                                                          | 1 |
| 153 | DNA polymerase sliding clamp subunit (PCNA homolog)                        | 1 |
| 154 | Electron transfer flavoprotein, alpha subunit                              | 1 |
| 155 | Electron transfer flavoprotein, beta subunit                               | 1 |
| 156 | Ethanolamine ammonia-lyase, large subunit                                  | 1 |
| 157 | F0F1-type ATP synthase, beta subunit                                       | 1 |
| 158 | Ferredoxin                                                                 | 1 |
| 159 | Fe-S-cluster-containing hydrogenase components 2                           | 1 |
| 160 | Flagellar filament outer layer protein (FLAA-2)                            | 1 |
| 161 | Flagellar filament outer layer protein FlaA, putative                      | 1 |
| 162 | Flagellar motor switch protein                                             | 1 |

|     |                                                                                                     |   |
|-----|-----------------------------------------------------------------------------------------------------|---|
| 163 | Flagellar motor switch/type III secretory pathway protein                                           | 1 |
| 164 | Glutamate synthase domain 3                                                                         | 1 |
| 165 | Glutamine synthetase                                                                                | 1 |
| 166 | Hypothetical lipoprotein FN1590                                                                     | 1 |
| 167 | Hypothetical protein AII0967                                                                        | 1 |
| 168 | Hypothetical protein CAC2564                                                                        | 1 |
| 169 | Hypothetical protein TP0608                                                                         | 1 |
| 170 | Hypothetical protein TTE2422                                                                        | 1 |
| 171 | Inorganic pyrophosphatase                                                                           | 1 |
| 172 | Inorganic pyrophosphatase/exopolyphosphatase                                                        | 1 |
| 173 | Isocitrate/isopropylmalate dehydrogenase                                                            | 1 |
| 174 | Lactoylglutathione lyase and related lyases                                                         | 1 |
| 175 | Leucyl aminopeptidase (aminopeptidase T)                                                            | 1 |
| 176 | Lipoprotein, putative                                                                               | 1 |
| 177 | Malate/lactate dehydrogenases                                                                       | 1 |
| 178 | Maltose-binding periplasmic proteins/domains                                                        | 1 |
| 179 | Membrane lipoprotein TmpC, putative                                                                 | 1 |
| 180 | Methionine synthase I (cobalamin-dependent), methyltransferase domain                               | 1 |
| 181 | Methionine synthase I, cobalamin-binding domain                                                     | 1 |
| 182 | Molecular chaperone, HSP90 family                                                                   | 1 |
| 183 | NifU homolog involved in Fe-S cluster formation                                                     | 1 |
| 184 | Nucleoside diphosphate kinase                                                                       | 1 |
| 185 | Ornithine carbamoyltransferase                                                                      | 1 |
| 186 | Periplasmic protease                                                                                | 1 |
| 187 | Phosphate uptake regulator                                                                          | 1 |
| 188 | Predicted alternative tryptophan synthase beta-subunit (paralog of TrpB)                            | 1 |
| 189 | Predicted cobalamin binding protein                                                                 | 1 |
| 190 | Predicted glycosylase                                                                               | 1 |
| 191 | Predicted solute binding protein                                                                    | 1 |
| 192 | Preprotein translocase subunit SecA (ATPase, RNA helicase)                                          | 1 |
| 193 | Putative chemotaxis protein CheX                                                                    | 1 |
| 194 | Pyridoxal phosphate biosynthesis protein                                                            | 1 |
| 195 | RecA/RadA recombinase                                                                               | 1 |
| 196 | Response regulator containing a CheY-like receiver domain and an HD-GYP domain                      | 1 |
| 197 | Response regulators consisting of a CheY-like receiver domain and a winged-helix DNA-binding domain | 1 |
| 198 | Ribose 5-phosphate isomerase                                                                        | 1 |
| 199 | Ribosomal protein L11                                                                               | 1 |
| 200 | Ribosomal protein L13                                                                               | 1 |
| 201 | Ribosomal protein L14                                                                               | 1 |
| 202 | Ribosomal protein L16/L10E                                                                          | 1 |
| 203 | Ribosomal protein L19                                                                               | 1 |
| 204 | Ribosomal protein L2                                                                                | 1 |
| 205 | Ribosomal protein L20                                                                               | 1 |
| 206 | Ribosomal protein L23                                                                               | 1 |
| 207 | Ribosomal protein L27                                                                               | 1 |
| 208 | Ribosomal protein L4                                                                                | 1 |
| 209 | Ribosomal protein L9                                                                                | 1 |
| 210 | Ribosomal protein S11                                                                               | 1 |
| 211 | Ribosomal protein S15P/S13E                                                                         | 1 |
| 212 | Ribosomal protein S19                                                                               | 1 |
| 213 | Ribosomal protein S21                                                                               | 1 |
| 214 | Ribosomal protein S4 and related proteins                                                           | 1 |
| 215 | Ribosomal protein S7                                                                                | 1 |
| 216 | Ribosomal protein S8                                                                                | 1 |
| 217 | Selenocysteine lyase                                                                                | 1 |

|     |                                                                                 |   |
|-----|---------------------------------------------------------------------------------|---|
| 218 | Spermidine/putrescine-binding periplasmic protein                               | 1 |
| 219 | Succinate dehydrogenase/fumarate reductase, Fe-S protein subunit                | 1 |
| 220 | Sugar ABC transporter sugar-binding protein                                     | 1 |
| 221 | Tartrate dehydratase beta subunit/Fumarate hydratase class I, C-terminal domain | 1 |
| 222 | Transcriptional accessory protein                                               | 1 |
| 223 | Translation initiation factor 1 (IF-1)                                          | 1 |
| 224 | Translation initiation factor 2 (IF-2; GTPase)                                  | 1 |
| 225 | TRAP-type uncharacterized transport system, periplasmic component               | 1 |
| 226 | Type IIA topoisomerase (DNA gyrase/topo II, topoisomerase IV), A subunit        | 1 |
| 227 | UDP-3-O-acyl-N-acetylglucosamine deacetylase                                    | 1 |
| 228 | Uncharacterized anaerobic dehydrogenase                                         | 1 |
| 229 | Uncharacterized N-terminal domain of the transcription elongation factor GreA   | 1 |
| 230 | Uncharacterized protein, involved in the regulation of septum location          | 1 |
| 231 | Zn-dependent hydrolases, including glyoxylases                                  | 1 |
| 232 | Zn-ribbon protein, possibly nucleic acid-binding                                | 1 |

\*Description may not be accurate, the the EC number or Pfam identification is more accurate. See Supplementary Table 1.

\*Enzymes related to glycolysis (Supplemental Figure 1)





|            |                      |                                                                                                       |                                                     |     |             |         |       |                        |           |  |  |     |     |
|------------|----------------------|-------------------------------------------------------------------------------------------------------|-----------------------------------------------------|-----|-------------|---------|-------|------------------------|-----------|--|--|-----|-----|
| 2005621057 | 2                    | [Termite Gut (version 3)]                                                                             | Pellet                                              | 295 |             |         |       |                        |           |  |  | Yes | No  |
| 2005621644 | 3                    | [Termite Gut (version 3)]                                                                             | Pellet                                              | 200 |             |         |       |                        |           |  |  | No  | No  |
| 2005623772 | 2                    | [Termite Gut (version 3)]                                                                             | Pellet                                              | 79  |             |         |       |                        |           |  |  | No  | No  |
| 2005624003 | 3                    | [Termite Gut (version 3)]                                                                             | Supernatant                                         | 54  |             |         |       |                        |           |  |  | No  | No  |
| 2005624639 | 2                    | [Termite Gut (version 3)]                                                                             | Pellet                                              | 154 |             |         |       |                        |           |  |  | No  | No  |
| 2005624822 | 5 / 2                | [Termite Gut (version 3)]                                                                             | Pellet / Supernatant                                | 174 |             |         |       |                        |           |  |  | No  | No  |
| 2005628280 | 2                    | [Termite Gut (version 3)]                                                                             | Supernatant                                         | 257 |             |         |       |                        |           |  |  | No  | No  |
| 2005630058 | 3                    | [Termite Gut (version 3)]                                                                             | Pellet                                              | 72  |             |         |       |                        |           |  |  | No  | No  |
| 2005632164 | 6 / 2 / 4 / 6 / 6    | [Termite Gut (version 3)]                                                                             | Global / Insoluble / Soluble / Pellet / Supernatant | 204 |             |         |       |                        |           |  |  | No  | No  |
| 2005579655 | 2                    | 3 Superfamily II DNA and RNA helicases [Termite Gut (version 3)]                                      | Pellet                                              | 292 |             | COG0513 | J L K | pfam00270<br>pfam00271 |           |  |  | No  | No  |
| 2005561323 | 2                    | 3-deoxy-D-arabino-heptulosonate 7-phosphate (DAH7P) synthase [Termite Gut (version 3)]                | Soluble                                             | 335 | EC:2.5.1.54 | COG2876 | E     | pfam00793              | TIGR01361 |  |  | No  | No  |
| 2005626222 | 2                    | 3-oxoacyl-(acyl-carrier-protein) synthase [Termite Gut (version 3)]                                   | Soluble                                             | 108 |             | COG0304 | Q I   | pfam0109               |           |  |  | No  | No  |
| 2005574726 | 2                    | 3-oxoacyl-(acyl-carrier-protein) synthase [Termite Gut (version 3)]                                   | Soluble                                             | 232 |             | COG0304 | I Q   | pfam0109<br>pfam02801  |           |  |  | No  | No  |
| 2005590435 | 2                    | 3-oxoacyl-(acyl-carrier-protein) synthase [Termite Gut (version 3)]                                   | Soluble                                             | 252 |             | COG0304 | Q I   | pfam0109<br>pfam02801  |           |  |  | No  | No  |
| 2005567653 | 3 / 8 / 2 / 6        | 3-phosphoglycerate kinase [Termite Gut (version 3)]                                                   | Global / Soluble / Pellet / Supernatant             | 364 | EC:2.7.2.3  | COG0126 | G     | pfam00162              |           |  |  | No  | No  |
| 2005567815 | 5 / 15 / 7 / 10      | 3-phosphoglycerate kinase [Termite Gut (version 3)]                                                   | Global / Soluble / Pellet / Supernatant             | 422 | EC:2.7.2.3  | COG0126 | G     | pfam00162              |           |  |  | No  | No  |
| 2005567982 | 2 / 4 / 2 / 3        | 3-phosphoglycerate kinase [Termite Gut (version 3)]                                                   | Global / Soluble / Pellet / Supernatant             | 420 | EC:2.7.2.3  | COG0126 | G     | pfam00162              |           |  |  | No  | No  |
| 2005571290 | 3 / 3 / 3            | 3-phosphoglycerate kinase [Termite Gut (version 3)]                                                   | Soluble / Pellet / Supernatant                      | 364 | EC:2.7.2.3  | COG0126 | G     | pfam00162              |           |  |  | No  | No  |
| 2005574478 | 3 / 3 / 2 / 2        | 3-phosphoglycerate kinase [Termite Gut (version 3)]                                                   | Global / Soluble / Pellet / Supernatant             | 420 | EC:2.7.2.3  | COG0126 | G     | pfam00162              |           |  |  | No  | No  |
| 2005577925 | 2 / 2 / 2 / 2        | 3-phosphoglycerate kinase [Termite Gut (version 3)]                                                   | Global / Soluble / Pellet / Supernatant             | 420 | EC:2.7.2.3  | COG0126 | G     | pfam00162              |           |  |  | No  | No  |
| 2005579897 | 2                    | 3-phosphoglycerate kinase [Termite Gut (version 3)]                                                   | Soluble                                             | 363 | EC:2.7.2.3  | COG0126 | G     | pfam00162              |           |  |  | No  | No  |
| 2005585093 | 2 / 2                | 3-phosphoglycerate kinase [Termite Gut (version 3)]                                                   | Soluble / Supernatant                               | 420 | EC:2.7.2.3  | COG0126 | G     | pfam00162              |           |  |  | No  | No  |
| 2005564119 | 4 / 9 / 7 / 8        | 3-phosphoglycerate kinase [Termite Gut (version 3)]                                                   | Global / Soluble / Pellet / Supernatant             | 219 |             | COG0126 | G     | pfam00162              |           |  |  | No  | No  |
| 2005632664 | 2 / 2                | 3-phosphoglycerate kinase [Termite Gut (version 3)]                                                   | Soluble / Pellet                                    | 54  |             | COG0126 | G     | pfam00162              |           |  |  | No  | No  |
| 2005560385 | 2                    | 4-alpha-glucanotransferase [Termite Gut (version 3)]                                                  | Soluble                                             | 524 |             | COG1640 | G     | pfam02446              | TIGR00217 |  |  | No  | No  |
| 2005566749 | 3                    | 4-alpha-glucanotransferase [Termite Gut (version 3)]                                                  | Pellet                                              | 481 |             | COG1640 | G     | pfam02446              |           |  |  | Yes | No  |
| 2005613800 | 2                    | 4-alpha-glucanotransferase [Termite Gut (version 3)]                                                  | Pellet                                              | 292 |             | COG1640 | G     | pfam02446              |           |  |  | No  | No  |
| 2005595113 | 2                    | 5'-nucleotidase/2',3'-cyclic phosphodiesterase and related esterases [Termite Gut (version 3)]        | Pellet                                              | 264 |             | COG0737 | F     | pfam02872              |           |  |  | No  | No  |
| 2005612799 | 3 / 5 / 7 / 6        | 6Fe-6S prismatic cluster-containing protein [Termite Gut (version 3)]                                 | Global / Soluble / Pellet / Supernatant             | 220 |             | COG1151 | C     | pfam03063              |           |  |  | No  | No  |
| 2005614899 | 2                    | 6-phosphofructokinase [Termite Gut (version 3)]                                                       | Pellet                                              | 294 |             | COG0205 | G     |                        | TIGR02477 |  |  | No  | No  |
| 2005579734 | 4                    | 6-phosphofructokinase [Termite Gut (version 3)]                                                       | Soluble                                             | 428 | EC:2.7.1.90 | COG0205 | G     | pfam00365              |           |  |  | No  | No  |
| 2005563490 | 2                    | 6-phosphofructokinase [Termite Gut (version 3)]                                                       | Pellet                                              | 297 |             | COG0205 | G     | pfam00365              |           |  |  | No  | No  |
| 2005618376 | 3                    | 6-phosphofructokinase [Termite Gut (version 3)]                                                       | Soluble                                             | 268 |             | COG0205 | G     | pfam00365              |           |  |  | No  | No  |
| 2005629625 | 2                    | 6-phosphofructokinase [Termite Gut (version 3)]                                                       | Pellet                                              | 224 |             | COG0205 | G     | pfam00365              |           |  |  | No  | No  |
| 2005566194 | 2                    | 6-phosphofructokinase [Termite Gut (version 3)]                                                       | Pellet                                              | 117 |             | COG0205 | G     |                        |           |  |  | No  | No  |
| 2005590963 | 2                    | 6-phosphogluconate dehydrogenase [Termite Gut (version 3)]                                            | Soluble                                             | 190 |             | COG0362 | G     | pfam03446              | TIGR00873 |  |  | No  | No  |
| 2005561042 | 3                    | ABC-type branched-chain amino acid transport systems, periplasmic component [Termite Gut (version 3)] | Supernatant                                         | 219 |             | COG0683 | E     | pfam01094              |           |  |  | No  | No  |
| 2005592340 | 2                    | ABC-type branched-chain amino acid transport systems, periplasmic component [Termite Gut (version 3)] | Pellet                                              | 208 |             | COG0683 | E     | pfam01094              |           |  |  | No  | No  |
| 2005592409 | 3 / 2 / 5 / 4        | ABC-type branched-chain amino acid transport systems, periplasmic component [Termite Gut (version 3)] | Global / Insoluble / Soluble / Pellet / Supernatant | 355 |             | COG0683 | E     | pfam01094              |           |  |  | No  | No  |
| 2005592629 | 2                    | ABC-type branched-chain amino acid transport systems, periplasmic component [Termite Gut (version 3)] | Supernatant                                         | 372 |             | COG0683 | E     | pfam01094              |           |  |  | Yes | No  |
| 2005577038 | 3 / 6 / 2            | ABC-type dipeptide transport system, periplasmic component [Termite Gut (version 3)]                  | Soluble / Pellet / Supernatant                      | 421 |             | COG0747 | E     | pfam00496              |           |  |  | No  | No  |
| 2005584829 | 2                    | ABC-type dipeptide transport system, periplasmic component [Termite Gut (version 3)]                  | Pellet                                              | 592 |             | COG0747 | E     | pfam00496              |           |  |  | Yes | No  |
| 2005627328 | 2 / 3 / 3            | ABC-type dipeptide transport system, periplasmic component [Termite Gut (version 3)]                  | Global / Soluble / Supernatant                      | 262 |             | COG0747 | E     | pfam00496              |           |  |  | No  | No  |
| 2005611687 | 2                    | ABC-type oligopeptide transport system, ATPase component [Termite Gut (version 3)]                    | Pellet                                              | 248 |             | COG4608 | E     | pfam00005              |           |  |  | No  | No  |
| 2005610970 | 2                    | ABC-type oligopeptide transport system, periplasmic component [Termite Gut (version 3)]               | Insoluble                                           | 277 |             | COG4166 | E     | pfam00496              |           |  |  | No  | No  |
| 2005569429 | 2                    | ABC-type phosphate transport system, ATPase component [Termite Gut (version 3)]                       | Pellet                                              | 162 |             | COG1117 | P     | pfam00005              |           |  |  | No  | No  |
| 2005611541 | 4 / 2 / 3            | ABC-type phosphate transport system, periplasmic component [Termite Gut (version 3)]                  | Soluble / Pellet / Supernatant                      | 252 | EC:3.6.3.27 | COG0226 | P     |                        | TIGR02136 |  |  | No  | No  |
| 2005566343 | 6 / 4 / 4 / 10       | ABC-type phosphate transport system, periplasmic component [Termite Gut (version 3)]                  | Global / Soluble / Pellet / Supernatant             | 192 |             | COG0226 | P     |                        |           |  |  | No  | No  |
| 2005580272 | 2                    | ABC-type phosphate transport system, periplasmic component [Termite Gut (version 3)]                  | Pellet                                              | 257 |             | COG0226 | P     |                        |           |  |  | No  | No  |
| 2005567570 | 2                    | ABC-type sugar transport system, ATPase component [Termite Gut (version 3)]                           | Pellet                                              | 402 | EC:3.6.3.17 | COG1129 | G     | pfam00005              |           |  |  | No  | No  |
| 2005579397 | 2                    | ABC-type sugar transport system, ATPase component [Termite Gut (version 3)]                           | Pellet                                              | 312 |             | COG1129 | G     | pfam00005              |           |  |  | No  | No  |
| 2005600890 | 2                    | ABC-type sugar transport system, ATPase component [Termite Gut (version 3)]                           | Pellet                                              | 235 |             | COG1129 | G     | pfam00005              |           |  |  | No  | No  |
| 2005567973 | 14 / 6 / 8 / 17 / 15 | ABC-type sugar transport system, periplasmic component [Termite Gut (version 3)]                      | Global / Insoluble / Soluble / Pellet / Supernatant | 333 |             | COG1653 | G     | pfam01547              |           |  |  | No  | No  |
| 2005568031 | 4                    | ABC-type sugar transport system, periplasmic component [Termite Gut (version 3)]                      | Pellet                                              | 373 |             | COG1653 | G     | pfam01547              |           |  |  | No  | No  |
| 2005577077 | 2 / 3 / 6            | ABC-type sugar transport system, periplasmic component [Termite Gut (version 3)]                      | Global / Pellet / Supernatant                       | 526 |             | COG1653 | G     | pfam01547              |           |  |  | Yes | Yes |
| 2005580209 | 2                    | ABC-type sugar transport system, periplasmic component [Termite Gut (version 3)]                      | Pellet                                              | 306 |             | COG1653 | G     | pfam01547              |           |  |  | No  | No  |
| 2005592637 | 2                    | ABC-type sugar transport system, periplasmic component [Termite Gut (version 3)]                      | Supernatant                                         | 279 |             | COG1653 | G     | pfam01547              |           |  |  | No  | No  |
| 2005593416 | 2 / 2                | ABC-type sugar transport system, periplasmic component [Termite Gut (version 3)]                      | Global / Pellet                                     | 433 |             | COG1653 | G     | pfam01547              |           |  |  | No  | No  |
| 2005615151 | 3                    | ABC-type sugar transport system, periplasmic component [Termite Gut (version 3)]                      | Supernatant                                         | 276 |             | COG1653 | G     | pfam01547              |           |  |  | No  | No  |
| 2005622479 | 2 / 3 / 4 / 4        | ABC-type sugar transport system, periplasmic component [Termite Gut (version 3)]                      | Global / Soluble / Pellet / Supernatant             | 269 |             | COG1653 | G     | pfam01547              |           |  |  | No  | No  |
| 2005627986 | 3                    | ABC-type sugar transport system, periplasmic component [Termite Gut (version 3)]                      | Pellet                                              | 281 |             | COG1653 | G     | pfam01547              |           |  |  | No  | No  |
| 2005628243 | 2 / 4 / 3 / 2        | ABC-type sugar transport system, periplasmic component [Termite Gut (version 3)]                      | Global / Soluble / Pellet / Supernatant             | 275 |             | COG1653 | G     | pfam01547              |           |  |  | No  | No  |
| 2005628438 | 2 / 3 / 2            | ABC-type sugar transport system, periplasmic component [Termite Gut (version 3)]                      | Global / Pellet / Supernatant                       | 274 |             | COG1653 | G     | pfam01547              |           |  |  | Yes | Yes |
| 2005562060 | 3 / 5 / 3 / 6        | ABC-type sugar transport system, periplasmic component [Termite Gut (version 3)]                      | Global / Soluble / Pellet / Supernatant             | 425 |             | COG1653 | G     |                        |           |  |  | No  | No  |
| 2005563831 | 4 / 5                | ABC-type sugar transport system, periplasmic component [Termite Gut (version 3)]                      | Pellet / Supernatant                                | 379 |             | COG1653 | G     |                        |           |  |  | Yes | No  |
| 2005576822 | 2 / 2                | ABC-type sugar transport system, periplasmic component [Termite Gut (version 3)]                      | Pellet / Supernatant                                | 464 |             | COG1653 | G     |                        |           |  |  | Yes | Yes |
| 2005584135 | 4 / 3                | ABC-type sugar transport system, periplasmic component [Termite Gut (version 3)]                      | Soluble / Supernatant                               | 298 |             | COG1653 | G     |                        |           |  |  | No  | No  |
| 2005585055 | 2 / 5 / 6            | ABC-type sugar transport system, periplasmic component [Termite Gut (version 3)]                      | Global / Pellet / Supernatant                       | 360 |             | COG1653 | G     |                        |           |  |  | No  | No  |
| 2005614639 | 3 / 2 / 5 / 5 / 5    | ABC-type sugar transport system, periplasmic component [Termite Gut (version 3)]                      | Global / Insoluble / Soluble / Pellet / Supernatant | 273 |             | COG1653 | G     |                        |           |  |  | No  | No  |
| 2005626749 | 5                    | ABC-type sugar transport system, periplasmic component [Termite Gut (version 3)]                      | Supernatant                                         | 256 |             | COG1653 | G     |                        |           |  |  | No  | No  |
| 2005628720 | 2 / 4                | ABC-type sugar transport system, periplasmic component [Termite Gut (version 3)]                      | Pellet / Supernatant                                | 260 |             | COG1653 | G     |                        |           |  |  | No  | No  |
| 2005572933 | 4 / 4 / 5            | ABC-type sugar transport system, periplasmic component [Termite Gut (version 3)]                      | Soluble / Pellet / Supernatant                      | 265 |             | COG1879 | G     |                        |           |  |  | No  | No  |
| 2005589326 | 3                    | ABC-type sugar transport system, periplasmic component [Termite Gut (version 3)]                      | Pellet                                              | 334 |             | COG1879 | G     |                        |           |  |  | Yes | No  |
| 2005599413 | 2 / 2                | ABC-type sugar transport system, periplasmic component [Termite Gut (version 3)]                      | Pellet / Supernatant                                | 260 |             |         |       |                        |           |  |  | No  | No  |
| 2005621987 | 2 / 2                | ABC-type sugar transport system, periplasmic component [Termite Gut (version 3)]                      | Soluble / Supernatant                               | 139 |             |         |       |                        |           |  |  | No  | No  |
| 2005631799 | 2 / 2 / 3 / 4 / 4    | ABC-type sugar transport system, periplasmic component [Termite Gut (version 3)]                      | Global / Insoluble / Soluble / Pellet / Supernatant | 293 |             |         |       |                        |           |  |  | No  | No  |
| 2005573637 | 4 / 7 / 5            | ABC-type sugar transport systems, ATPase components [Termite Gut (version 3)]                         | Global / Pellet / Supernatant                       | 341 | EC:3.6.3.20 | COG3839 | G     | pfam00005<br>pfam08402 |           |  |  | No  | No  |
| 2005574879 | 2 / 6 / 4            | ABC-type sugar transport systems, ATPase components [Termite Gut (version 3)]                         | Insoluble / Pellet / Supernatant                    | 278 | EC:3.6.3.20 | COG3839 | G     | pfam00005<br>pfam08402 |           |  |  | No  | No  |
| 2005566593 | 3 / 4                | ABC-type sugar transport systems, ATPase components [Termite Gut (version 3)]                         | Pellet / Supernatant                                | 170 |             | COG3839 | G     | pfam03459              |           |  |  | No  | No  |
| 2005566965 | 2 / 4                | ABC-type sugar transport systems, ATPase components [Termite Gut (version 3)]                         | Pellet / Supernatant                                | 197 |             | COG3839 | G     | pfam03459              |           |  |  | No  | No  |
| 2005615134 | 2                    | ABC-type sugar transport systems, ATPase components [Termite Gut (version 3)]                         | Pellet                                              | 170 |             | COG3839 | G     | pfam03459              |           |  |  | No  | No  |
| 2005600790 | 2                    | ABC-type sugar transport systems, ATPase components [Termite Gut (version 3)]                         | Pellet                                              | 195 |             | COG3839 | G     | pfam08402              |           |  |  | No  | No  |
| 2005564015 | 3                    | ABC-type xylose transport system, periplasmic component [Termite Gut (version 3)]                     | Supernatant                                         | 373 |             | COG4213 | G     |                        |           |  |  | Yes | No  |
| 2005567824 | 7 / 6 / 2 / 9 / 11   | ABC-type xylose transport system, periplasmic component [Termite Gut (version 3)]                     | Global / Soluble / Insoluble / Pellet / Supernatant | 192 |             | COG4213 | G     |                        |           |  |  | No  | No  |

|            |                      |                                                                                                                  |                                                     |     |                        |         |     |                                     |           |     |     |
|------------|----------------------|------------------------------------------------------------------------------------------------------------------|-----------------------------------------------------|-----|------------------------|---------|-----|-------------------------------------|-----------|-----|-----|
| 2005581566 | 5 / 3 / 7 / 3 / 8    | ABC-type xylose transport system, periplasmic component [Termite Gut (version 3)]                                | Global / Insoluble / Soluble / Pellet / Supernatant | 147 |                        | COG4213 | G   |                                     |           | Yes | No  |
| 2005581567 | 4 / 11 / 5 / 11      | ABC-type xylose transport system, periplasmic component [Termite Gut (version 3)]                                | Global / Soluble / Pellet / Supernatant             | 224 |                        | COG4213 | G   |                                     |           | Yes | No  |
| 2005587609 | 7 / 4 / 4 / 10 / 8   | ABC-type xylose transport system, periplasmic component [Termite Gut (version 3)]                                | Global / Insoluble / Soluble / Pellet / Supernatant | 340 |                        | COG4213 | G   |                                     |           | No  | No  |
| 2005591617 | 2 / 2 / 2 / 4 / 6    | ABC-type xylose transport system, periplasmic component [Termite Gut (version 3)]                                | Global / Insoluble / Soluble / Pellet / Supernatant | 317 |                        | COG4213 | G   |                                     |           | No  | No  |
| 2005591618 | 2 / 2                | ABC-type xylose transport system, periplasmic component [Termite Gut (version 3)]                                | Pellet / Supernatant                                | 193 |                        | COG4213 | G   |                                     |           | No  | No  |
| 2005600889 | 4 / 2 / 4            | ABC-type xylose transport system, periplasmic component [Termite Gut (version 3)]                                | Global / Soluble / Supernatant                      | 196 |                        | COG4213 | G   |                                     |           | No  | No  |
| 2005606763 | 7 / 3 / 6 / 5 / 8    | ABC-type xylose transport system, periplasmic component [Termite Gut (version 3)]                                | Global / Insoluble / Soluble / Pellet / Supernatant | 192 |                        | COG4213 | G   |                                     |           | No  | No  |
| 2005616382 | 4 / 2 / 7 / 4 / 5    | ABC-type xylose transport system, periplasmic component [Termite Gut (version 3)]                                | Global / Insoluble / Soluble / Pellet / Supernatant | 223 |                        | COG4213 | G   |                                     |           | No  | No  |
| 2005617407 | 3 / 2                | ABC-type xylose transport system, periplasmic component [Termite Gut (version 3)]                                | Global / Supernatant                                | 98  |                        | COG4213 | G   |                                     |           | No  | No  |
| 2005561688 | 2 / 3 / 3            | Acetate kinase [Termite Gut (version 3)]                                                                         | Global / Soluble / Supernatant                      | 419 | EC:2.7.2.1             | COG0282 | C   | pfam00871                           | TIGR00016 | No  | No  |
| 2005562626 | 3                    | Acetate kinase [Termite Gut (version 3)]                                                                         | Soluble                                             | 418 | EC:2.7.2.1             | COG0282 | C   | pfam00871                           | TIGR00016 | No  | No  |
| 2005592136 | 2 / 2                | Acetate kinase [Termite Gut (version 3)]                                                                         | Soluble / Supernatant                               | 285 |                        | COG0282 | C   | pfam00871                           | TIGR00016 | No  | No  |
| 2005598077 | 2                    | Acetate kinase [Termite Gut (version 3)]                                                                         | Soluble                                             | 277 |                        | COG0282 | C   | pfam00871                           | TIGR00016 | Yes | No  |
| 2005614889 | 2                    | Acetate kinase [Termite Gut (version 3)]                                                                         | Soluble                                             | 238 |                        | COG0282 | C   | pfam00871                           | TIGR00016 | Yes | No  |
| 2005623816 | 3                    | Acetate kinase [Termite Gut (version 3)]                                                                         | Soluble                                             | 254 |                        | COG0282 | C   | pfam00871                           | TIGR00016 | No  | No  |
| 2005567354 | 2                    | Acetyl-CoA carboxylase beta subunit [Termite Gut (version 3)]                                                    | Soluble                                             | 254 | EC:6.4.1.2             | COG0777 | I   | pfam01039                           | TIGR00515 | No  | No  |
| 2005561983 | 4                    | Acetyl-CoA hydrolase [Termite Gut (version 3)]                                                                   | Soluble                                             | 322 |                        | COG0427 | C   | pfam02550                           |           | No  | No  |
| 2005561007 | 2 / 3                | ACT domain-containing protein [Termite Gut (version 3)]                                                          | Soluble / Supernatant                               | 138 | EC:2.2.1.6             | COG4747 | R   | pfam01842                           |           | No  | No  |
| 2005568173 | 3                    | Actin-like ATPase involved in cell morphogenesis [Termite Gut (version 3)]                                       | Pellet                                              | 275 | EC:3.6.1.-             | COG1077 | D   | pfam06723                           | TIGR00904 | No  | No  |
| 2005571976 | 4                    | Actin-like ATPase involved in cell morphogenesis [Termite Gut (version 3)]                                       | Pellet                                              | 299 | EC:3.6.1.-             | COG1077 | D   | pfam06723                           | TIGR00904 | No  | No  |
| 2005583436 | 2                    | Activator of 2-hydroxyglutaryl-CoA dehydratase (H SP70-class ATPase domain) [Termite Gut (version 3)]            | Pellet                                              | 352 |                        | COG1924 | I   | pfam01869                           | TIGR00241 | Yes | No  |
| 2005581888 | 2                    | Acyl carrier protein [Termite Gut (version 3)]; Duplicate proteins: 2005594088                                   | Soluble                                             | 78  |                        | COG0236 | I Q | pfam00550                           | TIGR00517 | No  | No  |
| 2005585971 | 3 / 2 / 3            | Acyl-CoA dehydrogenases [Termite Gut (version 3)]                                                                | Soluble / Pellet / Supernatant                      | 371 | EC:1.3.99.2            | COG1960 | I   | pfam00441<br>pfam02770<br>pfam02771 |           | No  | No  |
| 2005563858 | 2                    | Acyl-CoA dehydrogenases [Termite Gut (version 3)]                                                                | Soluble                                             | 266 |                        | COG1960 | I   | pfam02770<br>pfam02771              |           | No  | No  |
| 2005562651 | 3 / 4 / 7 / 6        | Acyl-CoA synthetase (NDP forming) [Termite Gut (version 3)]                                                      | Global / Soluble / Pellet / Supernatant             | 508 |                        | COG1042 | C   |                                     |           | No  | No  |
| 2005571109 | 2 / 3                | Adenylate kinase and related kinases [Termite Gut (version 3)]                                                   | Pellet / Supernatant                                | 225 | EC:2.7.4.3             | COG0563 | F   | pfam00406                           | TIGR01351 | No  | No  |
| 2005567649 | 2 / 2 / 2            | Adenylate kinase and related kinases [Termite Gut (version 3)]                                                   | Soluble / Pellet / Supernatant                      | 122 |                        | COG0563 | F   | pfam00406                           |           | No  | No  |
| 2005563943 | 7 / 3 / 4            | ADP-glucose pyrophosphorylase [Termite Gut (version 3)]                                                          | Soluble / Pellet / Supernatant                      | 424 | EC:2.7.7.27            | COG0448 | G   | pfam00483                           | TIGR02091 | No  | No  |
| 2005568055 | 2                    | ADP-glucose pyrophosphorylase [Termite Gut (version 3)]                                                          | Soluble                                             | 323 | EC:2.7.7.27            | COG0448 | G   | pfam00483                           | TIGR02091 | No  | No  |
| 2005576220 | 2                    | ADP-glucose pyrophosphorylase [Termite Gut (version 3)]                                                          | Soluble                                             | 357 | EC:2.7.7.27            | COG0448 | G   | pfam00483                           |           | No  | No  |
| 2005580893 | 4 / 2                | Aerobic-type carbon monoxide dehydrogenase, large subunit CoxL/CutL homologs [Termite Gut (version 3)]           | Soluble / Pellet                                    | 430 |                        | COG1529 | C   | pfam01315<br>pfam02738              |           | No  | No  |
| 2005563808 | 2 / 3 / 2            | Aerobic-type carbon monoxide dehydrogenase, large subunit CoxL/CutL homologs [Termite Gut (version 3)]           | Soluble / Pellet / Supernatant                      | 340 |                        | COG1529 | C   | pfam02738                           |           | No  | No  |
| 2005580556 | 3                    | AICAR transformylase/IMP cyclohydrolase PurH (onl y IMP cyclohydrolase domain in Aful) [Termite Gut (version 3)] | Soluble                                             | 548 | EC:2.1.2.3             | COG0138 | F   | pfam01808<br>pfam02142              | TIGR00355 | No  | No  |
| 2005564573 | 2                    | AICAR transformylase/IMP cyclohydrolase PurH (onl y IMP cyclohydrolase domain in Aful) [Termite Gut (version 3)] | Soluble                                             | 434 | EC:2.1.2.3             | COG0138 | F   | pfam01808<br>pfam02142              |           | No  | No  |
| 2005589069 | 2                    | AICAR transformylase/IMP cyclohydrolase PurH (onl y IMP cyclohydrolase domain in Aful) [Termite Gut (version 3)] | Soluble                                             | 221 |                        | COG0138 | F   | pfam01808                           |           | No  | No  |
| 2005569547 | 4 / 5 / 3            | Alanine dehydrogenase [Termite Gut (version 3)]                                                                  | Soluble / Pellet / Supernatant                      | 286 | EC:1.4.1.1             | COG0686 | E   | pfam01262<br>pfam05222              | TIGR00518 | No  | No  |
| 2005589205 | 2 / 2                | Alanine dehydrogenase [Termite Gut (version 3)]                                                                  | Soluble / Supernatant                               | 210 |                        | COG0686 | E   | pfam01262                           |           | Yes | No  |
| 2005597916 | 2                    | Alanine dehydrogenase [Termite Gut (version 3)]                                                                  | Soluble                                             | 226 |                        | COG0686 | E   | pfam01262<br>pfam05222              |           | No  | No  |
| 2005566810 | 2                    | Alcohol dehydrogenase, class IV [Termite Gut (version 3)]                                                        | Soluble / Supernatant                               | 507 | EC:1.1.1.1             | COG1454 | C   | pfam00465                           |           | No  | No  |
| 2005562032 | 2 / 2 / 2            | Alcohol dehydrogenase, class IV [Termite Gut (version 3)]                                                        | Global / Soluble / Pellet                           | 713 | EC:1.1.1.1 EC:1.2.1.10 | COG1454 | C   | pfam00465                           |           | No  | No  |
| 2005565070 | 3                    | Alcohol dehydrogenase, class IV [Termite Gut (version 3)]                                                        | Pellet                                              | 803 | EC:1.1.1.1 EC:1.2.1.10 | COG1454 | C   | pfam00465                           |           | No  | No  |
| 2005571069 | 2 / 3                | Alcohol dehydrogenase, class IV [Termite Gut (version 3)]                                                        | Soluble / Pellet                                    | 783 | EC:1.1.1.1 EC:1.2.1.10 | COG1454 | C   | pfam00465                           |           | No  | No  |
| 2005565132 | 2 / 9                | Alpha-L-arabinofuranosidase [Termite Gut (version 3)]                                                            | Global / Pellet                                     | 687 |                        | COG3534 | G   | pfam03425                           |           | No  | No  |
| 2005575254 | 2                    | Alpha-L-arabinofuranosidase [Termite Gut (version 3)]                                                            | Pellet                                              | 281 |                        | COG3534 | G   | pfam03425                           |           | No  | No  |
| 2005564146 | 4 / 3                | Ammonia permease [Termite Gut (version 3)]                                                                       | Pellet / Supernatant                                | 438 |                        | COG0004 | P   | pfam00543<br>pfam00909              | TIGR00836 | No  | Yes |
| 2005579402 | 2                    | Ammonia permease [Termite Gut (version 3)]                                                                       | Pellet                                              | 446 |                        | COG0004 | P   | pfam00543<br>pfam00909              | TIGR00836 | Yes | Yes |
| 2005585913 | 2                    | Ammonia permease [Termite Gut (version 3)]                                                                       | Supernatant                                         | 550 |                        | COG0004 | P   | pfam00543<br>pfam00909              | TIGR00836 | Yes | Yes |
| 2005574431 | 2                    | Ammonia permease [Termite Gut (version 3)]                                                                       | Pellet                                              | 305 |                        | COG0004 | P   | pfam00543<br>pfam00909              |           | No  | Yes |
| 2005568030 | 2 / 2 / 2            | Archaeal/vacuolar-type H <sup>+</sup> -ATPase subunit A [Termite Gut (version 3)]                                | Global / Pellet / Supernatant                       | 448 | EC:3.6.3.14            | COG1155 | C   | pfam00006                           |           | No  | No  |
| 2005578692 | 4 / 3 / 2            | Archaeal/vacuolar-type H <sup>+</sup> -ATPase subunit A [Termite Gut (version 3)]                                | Soluble / Pellet / Supernatant                      | 522 | EC:3.6.3.14            | COG1155 | C   | pfam00006                           |           | No  | No  |
| 2005561836 | 8 / 2 / 10 / 11 / 11 | Archaeal/vacuolar-type H <sup>+</sup> -ATPase subunit A [Termite Gut (version 3)]                                | Global / Insoluble / Soluble / Pellet / Supernatant | 586 | EC:3.6.3.14            | COG1155 | C   | pfam00006<br>pfam02874              |           | No  | No  |
| 2005574380 | 2 / 2                | Archaeal/vacuolar-type H <sup>+</sup> -ATPase subunit A [Termite Gut (version 3)]                                | Pellet / Supernatant                                | 592 | EC:3.6.3.14            | COG1155 | C   | pfam00006<br>pfam02874              |           | No  | No  |
| 2005574772 | 4 / 3 / 2            | Archaeal/vacuolar-type H <sup>+</sup> -ATPase subunit A [Termite Gut (version 3)]                                | Global / Soluble / Supernatant                      | 486 | EC:3.6.3.14            | COG1155 | C   | pfam00006<br>pfam02874              |           | No  | No  |
| 2005585163 | 2                    | Archaeal/vacuolar-type H <sup>+</sup> -ATPase subunit A [Termite Gut (version 3)]                                | Pellet                                              | 561 | EC:3.6.3.14            | COG1155 | C   | pfam00006<br>pfam02874              |           | No  | No  |
| 2005583603 | 3 / 2 / 7 / 6 / 4    | Archaeal/vacuolar-type H <sup>+</sup> -ATPase subunit A [Termite Gut (version 3)]                                | Global / Insoluble / Soluble / Pellet / Supernatant | 559 | EC:3.6.3.15            | COG1155 | C   | pfam00006<br>pfam02874              |           | No  | No  |
| 2005562312 | 2 / 2 / 2            | Archaeal/vacuolar-type H <sup>+</sup> -ATPase subunit A [Termite Gut (version 3)]                                | Soluble / Pellet / Supernatant                      | 382 |                        | COG1155 | C   | pfam00006                           |           | No  | No  |
| 2005580242 | 2 / 2                | Archaeal/vacuolar-type H <sup>+</sup> -ATPase subunit A [Termite Gut (version 3)]                                | Soluble / Supernatant                               | 231 |                        | COG1155 | C   | pfam00006                           |           | No  | No  |
| 2005587429 | 2                    | Archaeal/vacuolar-type H <sup>+</sup> -ATPase subunit A [Termite Gut (version 3)]                                | Soluble                                             | 350 |                        | COG1155 | C   | pfam00006                           |           | No  | No  |
| 2005568029 | 2                    | Archaeal/vacuolar-type H <sup>+</sup> -ATPase subunit A [Termite Gut (version 3)]                                | Supernatant                                         | 132 |                        | COG1155 | C   | pfam02874                           |           | No  | No  |
| 2005560545 | 2 / 3 / 4 / 3        | Archaeal/vacuolar-type H <sup>+</sup> -ATPase subunit A [Termite Gut (version 3)]                                | Global / Soluble / Pellet / Supernatant             | 174 |                        | COG1155 | C   |                                     |           | No  | No  |
| 2005589107 | 2                    | Archaeal/vacuolar-type H <sup>+</sup> -ATPase subunit A [Termite Gut (version 3)]                                | Pellet                                              | 126 |                        | COG1155 | C   |                                     |           | No  | No  |
| 2005560544 | 7 / 2 / 7 / 13 / 10  | Archaeal/vacuolar-type H <sup>+</sup> -ATPase subunit B [Termite Gut (version 3)]                                | Global / Insoluble / Soluble / Pellet / Supernatant | 431 | EC:3.6.3.14            | COG1156 | C   | pfam00006<br>pfam02874              |           | No  | No  |
| 2005570309 | 2 / 2 / 2 / 2        | Archaeal/vacuolar-type H <sup>+</sup> -ATPase subunit B [Termite Gut (version 3)]                                | Global / Soluble / Pellet / Supernatant             | 423 | EC:3.6.3.14            | COG1156 | C   | pfam00006<br>pfam02874              |           | No  | No  |
| 2005578693 | 4 / 6 / 5 / 4        | Archaeal/vacuolar-type H <sup>+</sup> -ATPase subunit B [Termite Gut (version 3)]                                | Global / Soluble / Pellet / Supernatant             | 430 | EC:3.6.3.14            | COG1156 | C   | pfam00006<br>pfam02874              |           | No  | No  |
| 2005583604 |                      | Archaeal/vacuolar-type H <sup>+</sup> -ATPase subunit B [Termite Gut (version 3)]                                |                                                     | 390 | EC:3.6.3.15            | COG1156 | C   | pfam00006<br>pfam02874              |           | No  | No  |
| 2005573750 | 3 / 5 / 4            | Archaeal/vacuolar-type H <sup>+</sup> -ATPase subunit B [Termite Gut (version 3)]                                | Soluble / Pellet / Supernatant                      | 201 |                        | COG1156 | C   | pfam00006<br>pfam02874              |           | No  | No  |
| 2005561834 | 2                    | Archaeal/vacuolar-type H <sup>+</sup> -ATPase subunit E [Termite Gut (version 3)]                                | Pellet                                              | 186 | EC:3.6.3.14            | COG1390 | C   |                                     |           | No  | No  |
| 2005577269 | 2 / 2                | Archaeal/vacuolar-type H <sup>+</sup> -ATPase subunit E [Termite Gut (version 3)]                                | Pellet / Supernatant                                | 165 | EC:3.6.3.14            |         |     |                                     |           | No  | No  |
| 2005586946 | 2                    | Archaeal/vacuolar-type H <sup>+</sup> -ATPase subunit E [Termite Gut (version 3)]                                | Supernatant                                         | 204 | EC:3.6.3.14            |         |     |                                     |           | No  | No  |
| 2005591215 | 2 / 4 / 2            | Archaeal/vacuolar-type H <sup>+</sup> -ATPase subunit E [Termite Gut (version 3)]                                | Soluble / Pellet / Supernatant                      | 204 | EC:3.6.3.14            |         |     |                                     |           | No  | No  |
| 2005612171 | 2                    | Archaeal/vacuolar-type H <sup>+</sup> -ATPase subunit E [Termite Gut (version 3)]                                | Global                                              | 171 |                        |         |     |                                     |           | No  | No  |
| 2005628180 | 2 / 2                | Archaeal/vacuolar-type H <sup>+</sup> -ATPase subunit E [Termite Gut (version 3)]                                | Pellet / Supernatant                                | 169 |                        |         |     |                                     |           | No  | No  |
| 2005561472 | 3                    | Argininosuccinate synthase [Termite Gut (version 3)]                                                             | Pellet                                              | 405 | EC:6.3.4.5             | COG0137 | E   | pfam00764                           | TIGR00032 | No  | No  |
| 2005575083 | 5                    | Argininosuccinate synthase [Termite Gut (version 3)]                                                             | Pellet                                              | 411 | EC:6.3.4.5             | COG0137 | E   | pfam00764                           | TIGR00032 | No  | No  |
| 2005568621 | 2                    | Aspartate/tyrosine/aromatic aminotransferase [Termite Gut (version 3)]                                           | Soluble                                             | 439 | EC:2.6.1.1             | COG0436 | E   | pfam00155                           |           | No  | No  |



|            |                     |                                                                                             |                                                     |      |             |         |     |                                                               |           |     |    |
|------------|---------------------|---------------------------------------------------------------------------------------------|-----------------------------------------------------|------|-------------|---------|-----|---------------------------------------------------------------|-----------|-----|----|
| 2005625833 | 2 / 4 / 2           | Cytoplasmic filament protein A [Termite Gut (version 3)]                                    | Global / Pellet / Supernatant                       | 234  |             |         |     |                                                               |           | No  | No |
| 2005560573 | 4 / 2 / 2           | DNA polymerase sliding clamp subunit (PCNA homolog) [Termite Gut (version 3)]               | Soluble / Pellet / Supernatant                      | 306  | EC:2.7.7.7  | COG0592 | L   | pfam00712<br>pfam02767                                        | TIGR00663 | Yes | No |
| 2005578965 | 2                   | DNA-directed RNA polymerase, alpha subunit/40 kD subunit [Termite Gut (version 3)]          | Pellet                                              | 201  | EC:2.7.7.6  | COG0202 | K   | pfam01000                                                     | TIGR02027 | No  | No |
| 2005560676 | 2                   | DNA-directed RNA polymerase, alpha subunit/40 kD subunit [Termite Gut (version 3)]          | Soluble                                             | 283  | EC:2.7.7.6  | COG0202 | K   | pfam01000<br>pfam03118                                        | TIGR02027 | No  | No |
| 2005565086 | 2                   | DNA-directed RNA polymerase, beta subunit/140 kD subunit [Termite Gut (version 3)]          | Pellet                                              | 1072 | EC:2.7.7.6  | COG0085 | K   | pfam00562<br>pfam04561<br>pfam04565<br>pfam10385              | TIGR02013 | No  | No |
| 2005563864 | 6                   | DNA-directed RNA polymerase, beta subunit/140 kD subunit [Termite Gut (version 3)]          | Pellet                                              | 659  |             | COG0085 | K   | pfam00562<br>pfam04560                                        | TIGR02013 | No  | No |
| 2005567200 | 2                   | DNA-directed RNA polymerase, beta subunit/140 kD subunit [Termite Gut (version 3)]          | Pellet                                              | 648  |             | COG0085 | K   | pfam00562<br>pfam04560<br>pfam10385                           | TIGR02013 | No  | No |
| 2005564576 | 2 / 2 / 2           | DNA-directed RNA polymerase, beta subunit/140 kD subunit [Termite Gut (version 3)]          | Global / Pellet / Supernatant                       | 380  | EC:2.7.7.6  | COG0085 | K   | pfam00562<br>pfam04560                                        |           | No  | No |
| 2005595682 | 2 / 3               | DNA-directed RNA polymerase, beta subunit/140 kD subunit [Termite Gut (version 3)]          | Soluble / Pellet                                    | 384  |             | COG0085 | K   | pfam00562                                                     |           | No  | No |
| 2005563610 | 2 / 3 / 2           | DNA-directed RNA polymerase, beta subunit/140 kD subunit [Termite Gut (version 3)]          | Global / Pellet / Supernatant                       | 122  |             | COG0085 | K   | pfam00562<br>pfam04560                                        |           | No  | No |
| 2005564281 | 2 / 5 / 3           | DNA-directed RNA polymerase, beta subunit/140 kD subunit [Termite Gut (version 3)]          | Soluble / Pellet / Supernatant                      | 531  |             | COG0085 | K   | pfam04561<br>pfam04565                                        |           | No  | No |
| 2005565546 | 2                   | DNA-directed RNA polymerase, beta subunit/140 kD subunit [Termite Gut (version 3)]          | Pellet                                              | 492  |             | COG0085 | K   | pfam04561<br>pfam04565<br>pfam10385                           |           | No  | No |
| 2005564577 | 2                   | DNA-directed RNA polymerase, beta subunit/140 kD subunit [Termite Gut (version 3)]          | Soluble                                             | 236  |             | COG0085 | K   | pfam04565<br>pfam10385                                        |           | No  | No |
| 2005568403 | 2                   | DNA-directed RNA polymerase, beta' subunit/160 kD subunit [Termite Gut (version 3)]         | Pellet                                              | 691  |             | COG0086 | K   | pfam00623<br>pfam04983<br>pfam04997                           | TIGR02386 | No  | No |
| 2005579097 | 6                   | DNA-directed RNA polymerase, beta' subunit/160 kD subunit [Termite Gut (version 3)]         | Pellet                                              | 1055 |             | COG0086 | K   | pfam00623<br>pfam04983<br>pfam04997<br>pfam04998<br>pfam05000 | TIGR02386 | No  | No |
| 2005631219 | 2                   | DNA-directed RNA polymerase, beta' subunit/160 kD subunit [Termite Gut (version 3)]         | Pellet                                              | 193  |             | COG0086 | K   | pfam00623<br>pfam04983                                        |           | No  | No |
| 2005563863 | 6                   | DNA-directed RNA polymerase, beta' subunit/160 kD subunit [Termite Gut (version 3)]         | Pellet                                              | 512  |             | COG0086 | K   | pfam00623<br>pfam04983<br>pfam04997                           |           | No  | No |
| 2005563612 | 4 / 4 / 2           | DNA-directed RNA polymerase, beta' subunit/160 kD subunit [Termite Gut (version 3)]         | Global / Pellet / Supernatant                       | 508  |             | COG0086 | K   | pfam00623<br>pfam04983<br>pfam04998<br>pfam05000              |           | No  | No |
| 2005562612 | 3                   | DNA-directed RNA polymerase, beta' subunit/160 kD subunit [Termite Gut (version 3)]         | Pellet                                              | 382  |             | COG0086 | K   | pfam04983<br>pfam04998<br>pfam05000                           |           | No  | No |
| 2005565918 | 3                   | DNA-directed RNA polymerase, beta' subunit/160 kD subunit [Termite Gut (version 3)]         | Pellet                                              | 312  |             | COG0086 | K   | pfam04997                                                     |           | No  | No |
| 2005592702 | 4                   | DNA-directed RNA polymerase, beta' subunit/160 kD subunit [Termite Gut (version 3)]         | Pellet                                              | 704  |             | COG0086 | K   | pfam04998                                                     |           | No  | No |
| 2005562987 | 2 / 6 / 2           | DNA-directed RNA polymerase, beta' subunit/160 kD subunit [Termite Gut (version 3)]         | Global / Pellet / Supernatant                       | 457  |             |         |     | pfam04998                                                     |           | No  | No |
| 2005586152 | 11 / 3              | DNA-directed RNA polymerase, beta' subunit/160 kD subunit [Termite Gut (version 3)]         | Pellet / Supernatant                                | 448  |             |         |     | pfam04998                                                     |           | No  | No |
| 2005613809 | 2                   | DNA-directed RNA polymerase, beta' subunit/160 kD subunit [Termite Gut (version 3)]         | Pellet                                              | 299  |             | COG0086 | K   | pfam04998<br>pfam05000                                        |           | No  | No |
| 2005560445 | 2 / 3               | Electron transfer flavoprotein, alpha subunit [Termite Gut (version 3)]                     | Soluble / Pellet                                    | 336  |             | COG2025 | C   | pfam00766<br>pfam01012                                        |           | No  | No |
| 2005560444 | 2                   | Electron transfer flavoprotein, beta subunit [Termite Gut (version 3)]                      | Soluble                                             | 264  |             | COG2086 | C   | pfam01012                                                     |           | No  | No |
| 2005574491 | 8 / 2 / 10 / 8 / 8  | Enolase [Termite Gut (version 3)]                                                           | Global / Insoluble / Soluble / Pellet / Supernatant | 317  | EC:4.2.1.11 | COG0148 | G   | pfam00113                                                     | TIGR01060 | No  | No |
| 2005591060 | 2                   | Enolase [Termite Gut (version 3)]                                                           | supernatant                                         | 316  | EC:4.2.1.11 | COG0148 | G   | pfam00113<br>pfam03952                                        | TIGR01060 | No  | No |
| 2005566046 | 9 / 4 / 11 / 12 / 8 | Enolase [Termite Gut (version 3)]                                                           | Global / Insoluble / Soluble / Pellet / Supernatant | 347  | EC:4.2.1.11 | COG0148 | G   | pfam00113<br>pfam03952                                        | TIGR01060 | Yes | No |
| 2005568651 | 7 / 5 / 5 / 7       | Enolase [Termite Gut (version 3)]                                                           | Global / Soluble / Pellet / Supernatant             | 338  | EC:4.2.1.11 | COG0148 | G   | pfam00113<br>pfam03952                                        | TIGR01060 | Yes | No |
| 2005578941 | 7 / 6 / 8 / 7       | Enolase [Termite Gut (version 3)]                                                           | Global / Soluble / Pellet / Supernatant             | 433  | EC:4.2.1.11 | COG0148 | G   | pfam00113<br>pfam03952                                        | TIGR01060 | No  | No |
| 2005588664 | 3 / 2               | Enolase [Termite Gut (version 3)]                                                           | Soluble / Supernatant                               | 345  | EC:4.2.1.11 | COG0148 | G   | pfam00113<br>pfam03952                                        | TIGR01060 | Yes | No |
| 2005588960 | 2 / 7 / 3           | Enolase [Termite Gut (version 3)]                                                           | Global / Pellet / Supernatant                       | 430  | EC:4.2.1.11 | COG0148 | G   | pfam00113<br>pfam03952                                        | TIGR01060 | No  | No |
| 2005568433 | 3 / 2 / 5 / 4       | Enolase [Termite Gut (version 3)]                                                           | Global / Insoluble / Pellet / Supernatant           | 124  |             | COG0148 | G   | pfam00113                                                     |           | No  | No |
| 2005578806 | 2 / 2               | Enolase [Termite Gut (version 3)]                                                           | Soluble / Pellet                                    | 38   |             | COG0148 | G   | pfam00113                                                     |           | No  | No |
| 2005620547 | 2                   | Ethanolamine ammonia-lyase, large subunit [Termite Gut (version 3)]                         | Supernatant                                         | 189  |             | COG4303 | E   | pfam06751                                                     |           | No  | No |
| 2005561033 | 2 / 3 / 3 / 4       | Exopolyphosphatase-related proteins [Termite Gut (version 3)]                               | Global / Soluble / Pellet / Supernatant             | 240  |             | COG0618 | R   |                                                               |           | No  | No |
| 2005578428 | 2 / 2               | Exopolyphosphatase-related proteins [Termite Gut (version 3)]                               | Soluble / Supernatant                               | 303  |             | COG0618 | R   |                                                               |           | No  | No |
| 2005560916 | 2 / 4 / 2           | F0F1-type ATP synthase, beta subunit [Termite Gut (version 3)]                              | Global / Pellet / Supernatant                       | 302  |             | COG0055 | C   | pfam00006<br>pfam00306                                        | TIGR01039 | No  | No |
| 2005560273 | 2                   | Ferredoxin [Termite Gut (version 3)]                                                        | Supernatant                                         | 124  | EC:1.6.5.3  | COG3411 | C   |                                                               |           | No  | No |
| 2005628683 | 2                   | Fe-S-cluster-containing hydrogenase components 2 [Termite Gut (version 3)]                  | Pellet                                              | 182  |             | COG1142 | C   | pfam00037                                                     |           | Yes | No |
| 2005560662 | 2 / 2               | Flagellar filament outer layer protein (FLAA-2) [Termite Gut (version 3)]                   | Pellet / Supernatant                                | 142  |             |         |     | pfam04620                                                     |           | No  | No |
| 2005563075 | 3 / 4               | Flagellar filament outer layer protein [Termite Gut (version 3)]                            | Pellet / Supernatant                                | 248  |             |         |     | pfam04620                                                     |           | No  | No |
| 2005599953 | 3 / 4 / 4           | Flagellar filament outer layer protein [Termite Gut (version 3)]                            | Global / Pellet / Supernatant                       | 171  |             |         |     | pfam04620                                                     |           | No  | No |
| 2005604073 | 4 / 2 / 6 / 5       | Flagellar filament outer layer protein [Termite Gut (version 3)]                            | Global / Insoluble / Pellet / Supernatant           | 220  |             |         |     | pfam04620                                                     |           | No  | No |
| 2005608029 | 2 / 3               | Flagellar filament outer layer protein [Termite Gut (version 3)]                            | Pellet / Supernatant                                | 265  |             |         |     | pfam04620                                                     |           | No  | No |
| 2005565256 | 4 / 4               | Flagellar filament outer layer protein FlaA, putative [Termite Gut (version 3)]             | Pellet / Supernatant                                | 229  |             |         |     | pfam04620                                                     |           | No  | No |
| 2005574030 | 2 / 3 / 2           | Flagellar filament outer layer protein precursor (Sheath protein) [Termite Gut (version 3)] | Global / Pellet / Supernatant                       | 126  |             |         |     | pfam04620                                                     |           | No  | No |
| 2005599720 | 5 / 2 / 7 / 7       | Flagellar filament outer layer protein precursor (Sheath protein) [Termite Gut (version 3)] | Global / Insoluble / Pellet / Supernatant           | 283  |             |         |     | pfam04620                                                     |           | Yes | No |
| 2005628888 | 2 / 2               | Flagellar filament outer layer protein precursor (Sheath protein) [Termite Gut (version 3)] | Global / Supernatant                                | 127  |             |         |     | pfam04620                                                     |           | No  | No |
| 2005561349 | 2 / 2               | Flagellar motor switch protein [Termite Gut (version 3)]                                    | Pellet / Supernatant                                | 270  |             | COG1536 | N   | pfam01706                                                     | TIGR00207 | No  | No |
| 2005561971 | 3 / 3               | Flagellar motor switch/type III secretory pathway protein [Termite Gut (version 3)]         | Soluble / Pellet                                    | 255  |             | COG1886 | N U | pfam01052                                                     | TIGR02480 | No  | No |
| 2005571410 | 6                   | Flagellin and related hook-associated proteins [Termite Gut (version 3)]                    | Supernatant                                         | 264  |             | COG1344 | N   | pfam00669                                                     |           | No  | No |
| 2005578776 | 2 / 3               | Flagellin and related hook-associated proteins [Termite Gut (version 3)]                    | Global / Supernatant                                | 407  |             | COG1344 | N   | pfam00669                                                     |           | No  | No |
| 2005580359 | 2                   | Flagellin and related hook-associated proteins [Termite Gut (version 3)]                    | Soluble                                             | 202  |             | COG1344 | N   | pfam00669                                                     |           | No  | No |
| 2005583767 | 2 / 3               | Flagellin and related hook-associated proteins [Termite Gut (version 3)]                    | Pellet / Supernatant                                | 199  |             | COG1344 | N   | pfam00669                                                     |           | No  | No |
| 2005588056 | 2                   | Flagellin and related hook-associated proteins [Termite Gut (version 3)]                    | Supernatant                                         | 251  |             | COG1344 | N   | pfam00669                                                     |           | No  | No |
| 2005595675 | 2 / 3 / 3           | Flagellin and related hook-associated proteins [Termite Gut (version 3)]                    | Global / Pellet / Supernatant                       | 139  |             | COG1344 | N   | pfam00669                                                     |           | No  | No |
| 2005598482 | 2 / 2               | Flagellin and related hook-associated proteins [Termite Gut (version 3)]                    | Global / Supernatant                                | 140  |             | COG1344 | N   | pfam00669                                                     |           | No  | No |
| 2005611453 | 3 / 3               | Flagellin and related hook-associated proteins [Termite Gut (version 3)]                    | Pellet / Supernatant                                | 106  |             | COG1344 | N   | pfam00669                                                     |           | No  | No |
| 2005615296 | 5 / 2 / 5 / 4       | Flagellin and related hook-associated proteins [Termite Gut (version 3)]                    | Global / Soluble / Pellet / Supernatant             | 156  |             | COG1344 | N   | pfam00669                                                     |           | No  | No |
| 2005615346 | 2                   | Flagellin and related hook-associated proteins [Termite Gut (version 3)]                    | Supernatant                                         | 249  |             | COG1344 | N   | pfam00669                                                     |           | No  | No |
| 2005615783 | 2 / 2 / 4 / 3       | Flagellin and related hook-associated proteins [Termite Gut (version 3)]                    | Global / Soluble / Pellet / Supernatant             | 127  |             | COG1344 | N   | pfam00669                                                     |           | No  | No |
| 2005623226 | 2                   | Flagellin and related hook-associated proteins [Termite Gut (version 3)]                    | Supernatant                                         | 138  |             | COG1344 | N   | pfam00669                                                     |           | No  | No |
| 2005623826 | 3 / 6               | Flagellin and related hook-associated proteins [Termite Gut (version 3)]                    | Global / Supernatant                                | 272  |             | COG1344 | N   | pfam00669                                                     |           | No  | No |

|            |                      |                                                                          |                                                     |     |             |         |   |                        |                        |     |    |
|------------|----------------------|--------------------------------------------------------------------------|-----------------------------------------------------|-----|-------------|---------|---|------------------------|------------------------|-----|----|
| 2005624996 | 2 / 2                | Flagellin and related hook-associated proteins [Termite Gut (version 3)] | Pellet / Supernatant                                | 136 |             | COG1344 | N | pfam00669              |                        | No  | No |
| 2005629704 | 2 / 2 / 3            | Flagellin and related hook-associated proteins [Termite Gut (version 3)] | Global / Pellet / Supernatant                       | 214 |             | COG1344 | N | pfam00669              |                        | No  | No |
| 2005631434 | 3 / 2                | Flagellin and related hook-associated proteins [Termite Gut (version 3)] | Pellet / Supernatant                                | 217 |             | COG1344 | N | pfam00669              |                        | No  | No |
| 2005631695 | 4 / 3 / 3            | Flagellin and related hook-associated proteins [Termite Gut (version 3)] | Global / Pellet / Supernatant                       | 213 |             | COG1344 | N | pfam00669              |                        | No  | No |
| 2005560462 | 12 / 5 / 6 / 15 / 13 | Flagellin and related hook-associated proteins [Termite Gut (version 3)] | Global / Insoluble / Soluble / Pellet / Supernatant | 286 |             | COG1344 | N | pfam00669<br>pfam00700 |                        | No  | No |
| 2005564339 | 3 / 4 / 5            | Flagellin and related hook-associated proteins [Termite Gut (version 3)] | Global / Pellet / Supernatant                       | 751 |             | COG1344 | N | pfam00669<br>pfam00700 |                        | No  | No |
| 2005565674 | 2 / 2 / 3            | Flagellin and related hook-associated proteins [Termite Gut (version 3)] | Global / Soluble / Supernatant                      | 573 |             | COG1344 | N | pfam00669<br>pfam00700 |                        | No  | No |
| 2005565784 | 2                    | Flagellin and related hook-associated proteins [Termite Gut (version 3)] | Pellet                                              | 284 |             | COG1344 | N | pfam00669<br>pfam00700 |                        | No  | No |
| 2005565785 | 3 / 2 / 2 / 6 / 7    | Flagellin and related hook-associated proteins [Termite Gut (version 3)] | Global / Insoluble / Soluble / Pellet / Supernatant | 285 |             | COG1344 | N | pfam00669<br>pfam00700 |                        | No  | No |
| 2005570913 | 11 / 2 / 4 / 15 / 11 | Flagellin and related hook-associated proteins [Termite Gut (version 3)] | Global / Insoluble / Soluble / Pellet / Supernatant | 290 |             | COG1344 | N | pfam00669<br>pfam00700 |                        | No  | No |
| 2005571456 | 6 / 2 / 6 / 6        | Flagellin and related hook-associated proteins [Termite Gut (version 3)] | Global / Insoluble / Pellet / Supernatant           | 286 |             | COG1344 | N | pfam00669<br>pfam00700 |                        | No  | No |
| 2005571569 | 2 / 2 / 4 / 4        | Flagellin and related hook-associated proteins [Termite Gut (version 3)] | Global / Insoluble / Pellet / Supernatant           | 260 |             | COG1344 | N | pfam00669<br>pfam00700 |                        | No  | No |
| 2005571570 | 3 / 4 / 3            | Flagellin and related hook-associated proteins [Termite Gut (version 3)] | Global / Pellet / Supernatant                       | 285 |             | COG1344 | N | pfam00669<br>pfam00700 |                        | No  | No |
| 2005574801 | 3 / 2 / 3 / 3        | Flagellin and related hook-associated proteins [Termite Gut (version 3)] | Global / Insoluble / Pellet / Supernatant           | 285 |             | COG1344 | N | pfam00669<br>pfam00700 |                        | No  | No |
| 2005574802 | 3 / 6 / 4            | Flagellin and related hook-associated proteins [Termite Gut (version 3)] | Global / Pellet / Supernatant                       | 255 |             | COG1344 | N | pfam00669<br>pfam00700 |                        | No  | No |
| 2005577109 | 4 / 4                | Flagellin and related hook-associated proteins [Termite Gut (version 3)] | Pellet / Supernatant                                | 270 |             | COG1344 | N | pfam00669<br>pfam00700 |                        | No  | No |
| 2005580182 | 5 / 3 / 5 / 4 / 11   | Flagellin and related hook-associated proteins [Termite Gut (version 3)] | Global / Insoluble / Soluble / Pellet / Supernatant | 567 |             | COG1344 | N | pfam00669<br>pfam00700 |                        | No  | No |
| 2005580357 | 5 / 2 / 5 / 10 / 6   | Flagellin and related hook-associated proteins [Termite Gut (version 3)] | Global / Insoluble / Soluble / Pellet / Supernatant | 255 |             | COG1344 | N | pfam00669<br>pfam00700 |                        | No  | No |
| 2005580358 | 2 / 2 / 3            | Flagellin and related hook-associated proteins [Termite Gut (version 3)] | Global / Pellet / Supernatant                       | 280 |             | COG1344 | N | pfam00669<br>pfam00700 |                        | No  | No |
| 2005581933 | 3 / 2 / 2 / 3        | Flagellin and related hook-associated proteins [Termite Gut (version 3)] | Global / Insoluble / Soluble / Supernatant          | 776 |             | COG1344 | N | pfam00669<br>pfam00700 |                        | No  | No |
| 2005582897 | 2                    | Flagellin and related hook-associated proteins [Termite Gut (version 3)] | Supernatant                                         | 258 |             | COG1344 | N | pfam00669<br>pfam00700 |                        | No  | No |
| 2005586393 | 2 / 2                | Flagellin and related hook-associated proteins [Termite Gut (version 3)] | Global / Supernatant                                | 179 |             | COG1344 | N | pfam00669<br>pfam00700 |                        | No  | No |
| 2005586646 | 3 / 2                | Flagellin and related hook-associated proteins [Termite Gut (version 3)] | Pellet / Supernatant                                | 286 |             | COG1344 | N | pfam00669<br>pfam00700 |                        | No  | No |
| 2005590502 | 2 / 2                | Flagellin and related hook-associated proteins [Termite Gut (version 3)] | Pellet / Supernatant                                | 216 |             | COG1344 | N | pfam00669<br>pfam00700 |                        | No  | No |
| 2005591933 | 3 / 6 / 4            | Flagellin and related hook-associated proteins [Termite Gut (version 3)] | Global / Pellet / Supernatant                       | 284 |             | COG1344 | N | pfam00669<br>pfam00700 |                        | No  | No |
| 2005594217 | 2 / 2                | Flagellin and related hook-associated proteins [Termite Gut (version 3)] | Pellet / Supernatant                                | 235 |             | COG1344 | N | pfam00669<br>pfam00700 |                        | No  | No |
| 2005602492 | 2                    | Flagellin and related hook-associated proteins [Termite Gut (version 3)] | Supernatant                                         | 260 |             | COG1344 | N | pfam00669<br>pfam00700 |                        | No  | No |
| 2005611420 | 2 / 2                | Flagellin and related hook-associated proteins [Termite Gut (version 3)] | Global / Pellet                                     | 277 |             | COG1344 | N | pfam00669<br>pfam00700 |                        | No  | No |
| 2005614827 | 3 / 4 / 3 / 4        | Flagellin and related hook-associated proteins [Termite Gut (version 3)] | Global / Soluble / Pellet / Supernatant             | 276 |             | COG1344 | N | pfam00669<br>pfam00700 |                        | No  | No |
| 2005580184 | 2                    | Flagellin and related hook-associated proteins [Termite Gut (version 3)] | supernatant                                         | 356 |             | COG1344 | N | pfam00700              |                        | No  | No |
| 2005564007 | 3 / 5 / 3            | Flagellin and related hook-associated proteins [Termite Gut (version 3)] | Global / Pellet / Supernatant                       | 160 |             | COG1344 | N | pfam00700              |                        | No  | No |
| 2005571794 | 4 / 2 / 2 / 2 / 5    | Flagellin and related hook-associated proteins [Termite Gut (version 3)] | Global / Insoluble / Soluble / Pellet / Supernatant | 287 |             | COG1344 | N | pfam00700              |                        | No  | No |
| 2005572009 | 2                    | Flagellin and related hook-associated proteins [Termite Gut (version 3)] | Supernatant                                         | 250 |             | COG1344 | N | pfam00700              |                        | No  | No |
| 2005577451 | 2                    | Flagellin and related hook-associated proteins [Termite Gut (version 3)] | Supernatant                                         | 341 |             | COG1344 | N | pfam00700              |                        | No  | No |
| 2005579387 | 3                    | Flagellin and related hook-associated proteins [Termite Gut (version 3)] | Supernatant                                         | 349 |             | COG1344 | N | pfam00700              |                        | No  | No |
| 2005583080 | 2                    | Flagellin and related hook-associated proteins [Termite Gut (version 3)] | Supernatant                                         | 99  |             | COG1344 | N | pfam00700              |                        | No  | No |
| 2005616676 | 5 / 2 / 8            | Flagellin and related hook-associated proteins [Termite Gut (version 3)] | Global / Pellet / Supernatant                       | 242 |             | COG1344 | N | pfam00700              |                        | No  | No |
| 2005574052 | 4 / 2 / 7 / 5        | FOG [Termite Gut (version 3)]                                            | Global / Soluble / Pellet / Supernatant             | 142 |             | COG4753 | T | pfam00072              |                        | No  | No |
| 2005577635 | 4 / 2 / 4 / 3        | FOG [Termite Gut (version 3)]                                            | Global / Soluble / Pellet / Supernatant             | 144 |             | COG4753 | T | pfam00072              |                        | No  | No |
| 2005595933 | 2                    | FOG [Termite Gut (version 3)]                                            | Soluble                                             | 63  |             | COG4753 | T | pfam00072              |                        | No  | No |
| 2005589908 | 3                    | FOG [Termite Gut (version 3)]                                            | Pellet                                              | 655 |             | COG2956 | G | pfam00515<br>pfam07719 |                        | No  | No |
| 2005562835 | 4 / 6 / 5 / 4        | Fructose/tagatose biphosphate aldolase [Termite Gut (version 3)]         | Global / Soluble / Pellet / Supernatant             | 332 | EC:4.1.2.13 | COG0191 | G | pfam01116              | TIGR00167<br>TIGR01859 | No  | No |
| 2005608363 | 2                    | Fructose/tagatose biphosphate aldolase [Termite Gut (version 3)]         | Pellet                                              | 278 | EC:4.1.2.13 | COG0191 | G | pfam01116              | TIGR00167<br>TIGR01859 | No  | No |
| 2005582533 | 4 / 3 / 4            | Fructose/tagatose biphosphate aldolase [Termite Gut (version 3)]         | Soluble / Pellet / Supernatant                      | 214 |             | COG0191 | G | pfam01116              |                        | No  | No |
| 2005585661 | 2 / 3 / 2            | Fructose/tagatose biphosphate aldolase [Termite Gut (version 3)]         | Soluble / Pellet / Supernatant                      | 102 |             | COG0191 | G | pfam01116              |                        | No  | No |
| 2005617512 | 2 / 2                | Fructose/tagatose biphosphate aldolase [Termite Gut (version 3)]         | Soluble / Supernatant                               | 101 |             | COG0191 | G | pfam01116              |                        | No  | No |
| 2005621129 | 2                    | Fructose/tagatose biphosphate aldolase [Termite Gut (version 3)]         | Soluble                                             | 208 |             | COG0191 | G | pfam01116              |                        | No  | No |
| 2005627089 | 7 / 2                | Fructose/tagatose biphosphate aldolase [Termite Gut (version 3)]         | Soluble / Supernatant                               | 189 |             | COG0191 | G | pfam01116              |                        | No  | No |
| 2005564952 | 2                    | Glucan phosphorylase [Termite Gut (version 3)]                           | Pellet                                              | 407 |             | COG0058 | G | pfam00343              | TIGR02093              | No  | No |
| 2005573727 | 2                    | Glucan phosphorylase [Termite Gut (version 3)]                           | Pellet                                              | 461 |             | COG0058 | G | pfam00343              | TIGR02093              | No  | No |
| 2005580113 | 2                    | Glucan phosphorylase [Termite Gut (version 3)]                           | Soluble                                             | 500 |             | COG0058 | G | pfam00343              | TIGR02093              | No  | No |
| 2005590718 | 2                    | Glucan phosphorylase [Termite Gut (version 3)]                           | Pellet                                              | 474 |             | COG0058 | G | pfam00343              | TIGR02093              | No  | No |
| 2005568461 | 2 / 4                | Glucan phosphorylase [Termite Gut (version 3)]                           | Pellet / Supernatant                                | 696 | EC:2.4.1.1  | COG0058 | G | pfam00343              | TIGR02094              | No  | No |
| 2005571490 | 2 / 2 / 2 / 4        | Glucan phosphorylase [Termite Gut (version 3)]                           | Global / Soluble / Pellet / Supernatant             | 788 | EC:2.4.1.1  | COG0058 | G | pfam00343              | TIGR02094              | No  | No |
| 2005560847 | 4 / 11 / 7           | Glucan phosphorylase [Termite Gut (version 3)]                           | Global / Pellet / Supernatant                       | 606 |             | COG0058 | G | pfam00343              | TIGR02094              | Yes | No |
| 2005561253 | 2 / 2 / 2 / 2        | Glucan phosphorylase [Termite Gut (version 3)]                           | Global / Soluble / Pellet / Supernatant             | 421 |             | COG0058 | G | pfam00343              | TIGR02094              | No  | No |
| 2005565929 | 3                    | Glucan phosphorylase [Termite Gut (version 3)]                           | Pellet                                              | 615 |             | COG0058 | G | pfam00343              | TIGR02094              | No  | No |
| 2005569444 | 3                    | Glucan phosphorylase [Termite Gut (version 3)]                           | Pellet                                              | 492 |             | COG0058 | G | pfam00343              | TIGR02094              | No  | No |
| 2005570520 | 2 / 2                | Glucan phosphorylase [Termite Gut (version 3)]                           | Pellet / Supernatant                                | 303 |             | COG0058 | G |                        | TIGR02094              | No  | No |
| 2005608263 | 2                    | Glucan phosphorylase [Termite Gut (version 3)]                           | Supernatant                                         | 272 |             | COG0058 | G |                        | TIGR02094              | No  | No |
| 2005560034 | 2 / 4 / 3            | Glucose-6-phosphate isomerase [Termite Gut (version 3)]                  | Global / Soluble / Supernatant                      | 524 | EC:5.3.1.9  | COG0166 | G | pfam00342              |                        | No  | No |
| 2005581307 | 11 / 3 / 5           | Glucose-6-phosphate isomerase [Termite Gut (version 3)]                  | Soluble / Pellet / Supernatant                      | 487 | EC:5.3.1.9  | COG0166 | G | pfam00342              |                        | No  | No |
| 2005591804 | 2 / 2                | Glucose-6-phosphate isomerase [Termite Gut (version 3)]                  | Insoluble / Soluble                                 | 527 | EC:5.3.1.9  | COG0166 | G | pfam00342              |                        | No  | No |
| 2005561632 | 2                    | Glucose-6-phosphate isomerase [Termite Gut (version 3)]                  | Soluble                                             | 80  |             | COG0166 | G | pfam00342              |                        | No  | No |
| 2005561633 | 2 / 2                | Glucose-6-phosphate isomerase [Termite Gut (version 3)]                  | Soluble / Pellet                                    | 282 |             | COG0166 | G | pfam00342              |                        | Yes | No |
| 2005565757 | 2                    | Glucose-6-phosphate isomerase [Termite Gut (version 3)]                  | Soluble                                             | 344 |             | COG0166 | G | pfam00342              |                        | No  | No |
| 2005566406 | 2                    | Glucose-6-phosphate isomerase [Termite Gut (version 3)]                  | Supernatant                                         | 375 |             | COG0166 | G | pfam00342              |                        | No  | No |
| 2005576187 | 2                    | Glucose-6-phosphate isomerase [Termite Gut (version 3)]                  | Soluble                                             | 251 |             | COG0166 | G | pfam00342              |                        | No  | No |
| 2005565685 | 5 / 7 / 2            | Glutamate dehydrogenase/leucine dehydrogenase [Termite Gut (version 3)]  | Soluble / Pellet / Supernatant                      | 338 | EC:1.4.1.4  | COG0334 | E | pfam00208<br>pfam02812 |                        | No  | No |
| 2005569706 | 4 / 2 / 3            | Glutamate dehydrogenase/leucine dehydrogenase [Termite Gut (version 3)]  | Soluble / Pellet / Supernatant                      | 389 | EC:1.4.1.4  | COG0334 | E | pfam00208<br>pfam02812 |                        | No  | No |
| 2005586512 | 3 / 5 / 4            | Glutamate dehydrogenase/leucine dehydrogenase [Termite Gut (version 3)]  | Soluble / Pellet / Supernatant                      | 443 | EC:1.4.1.4  | COG0334 | E | pfam00208<br>pfam02812 |                        | No  | No |

|            |                       |                                                                                                         |                                                     |     |             |         |   |                                                               |                        |     |     |
|------------|-----------------------|---------------------------------------------------------------------------------------------------------|-----------------------------------------------------|-----|-------------|---------|---|---------------------------------------------------------------|------------------------|-----|-----|
| 2005595490 | 2 / 2                 | Glutamate dehydrogenase/leucine dehydrogenase [Termite Gut (version 3)]                                 | Pellet / Supernatant                                | 443 | EC:1.4.1.4  | COG0334 | E | pfam00208<br>pfam02812                                        |                        | No  | No  |
| 2005567704 | 2                     | Glutamate dehydrogenase/leucine dehydrogenase [Termite Gut (version 3)]                                 | Soluble                                             | 128 |             | COG0334 | E | pfam00208                                                     |                        | No  | No  |
| 2005560894 | 2 / 2 / 5 / 2         | Glutamate synthase domain 2 [Termite Gut (version 3)]                                                   | Global / Insoluble / Pellet / Supernatant           | 501 | EC:1.4.1.13 | COG0069 | E | pfam00037<br>pfam01645                                        |                        | No  | No  |
| 2005573059 | 2                     | Glutamate synthase domain 2 [Termite Gut (version 3)]                                                   | Pellet                                              | 459 | EC:1.4.1.13 | COG0069 | E | pfam00037<br>pfam01645                                        |                        | Yes | No  |
| 2005587228 | 4 / 2 / 2             | Glutamate synthase domain 2 [Termite Gut (version 3)]                                                   | Soluble / Pellet / Supernatant                      | 530 | EC:1.4.1.13 | COG0069 | E | pfam01645                                                     |                        | No  | No  |
| 2005577468 | 3                     | Glutamate synthase domain 2 [Termite Gut (version 3)]                                                   | Pellet                                              | 376 |             | COG0069 | E | pfam00037<br>pfam01645                                        |                        | No  | No  |
| 2005561262 | 2                     | Glutamate synthase domain 2 [Termite Gut (version 3)]                                                   | Pellet                                              | 335 |             | COG0069 | E | pfam01645                                                     |                        | No  | No  |
| 2005577193 | 2 / 4 / 3             | Glutamate synthase domain 2 [Termite Gut (version 3)]                                                   | Soluble / Pellet / Supernatant                      | 255 |             | COG0069 | E |                                                               |                        | No  | No  |
| 2005619315 | 2                     | Glutamate synthase domain 2 [Termite Gut (version 3)]                                                   | Pellet                                              | 190 |             | COG0069 | E |                                                               |                        | No  | No  |
| 2005581210 | 2                     | Glutamate synthase domain 3 [Termite Gut (version 3)]                                                   | Pellet                                              | 239 | EC:1.4.1.13 | COG0070 | E | pfam01493                                                     |                        | No  | No  |
| 2005612759 | 2                     | Glutamine synthetase [Termite Gut (version 3)]                                                          | Pellet                                              | 185 |             | COG0174 | E | pfam00120<br>pfam03951                                        |                        | No  | No  |
| 2005560305 | 16 / 3 / 11 / 15 / 18 | Glyceraldehyde-3-phosphate dehydrogenase/erythros e-4-phosphate dehydrogenase [Termite Gut (version 3)] | Global / Insoluble / Soluble / Pellet / Supernatant | 310 | EC:1.2.1.12 | COG0057 | G | pfam00044<br>pfam02800                                        | TIGR01534              | No  | No  |
| 2005574479 | 3                     | Glyceraldehyde-3-phosphate dehydrogenase/erythros e-4-phosphate dehydrogenase [Termite Gut (version 3)] | Soluble                                             | 265 | EC:1.2.1.12 | COG0057 | G | pfam00044<br>pfam02800                                        | TIGR01534              | No  | No  |
| 2005586540 | 3 / 8 / 3             | Glyceraldehyde-3-phosphate dehydrogenase/erythros e-4-phosphate dehydrogenase [Termite Gut (version 3)] | Global / Pellet / Supernatant                       | 270 | EC:1.2.1.12 | COG0057 | G | pfam00044<br>pfam02800                                        | TIGR01534              | No  | No  |
| 2005602674 | 3 / 4 / 2 / 3         | Glyceraldehyde-3-phosphate dehydrogenase/erythros e-4-phosphate dehydrogenase [Termite Gut (version 3)] | Global / Soluble / Pellet / Supernatant             | 258 | EC:1.2.1.12 | COG0057 | G | pfam00044<br>pfam02800                                        | TIGR01534              | No  | No  |
| 2005603510 | 3 / 3 / 2             | Glyceraldehyde-3-phosphate dehydrogenase/erythros e-4-phosphate dehydrogenase [Termite Gut (version 3)] | Soluble / Pellet / Supernatant                      | 273 | EC:1.2.1.12 | COG0057 | G | pfam00044<br>pfam02800                                        | TIGR01534              | No  | No  |
| 2005584736 | 2 / 2 / 2 / 3         | Glyceraldehyde-3-phosphate dehydrogenase/erythros e-4-phosphate dehydrogenase [Termite Gut (version 3)] | Global / Soluble / Pellet / Supernatant             | 130 |             | COG0057 | G | pfam00044<br>pfam02800                                        | TIGR01534              | No  | No  |
| 2005567814 | 2 / 2                 | Glyceraldehyde-3-phosphate dehydrogenase/erythros e-4-phosphate dehydrogenase [Termite Gut (version 3)] | Global / Pellet                                     | 207 |             | COG0057 | G | pfam00044<br>pfam02800                                        | TIGR01534              | No  | No  |
| 2005593615 | 5 / 3 / 8 / 4         | Glyceraldehyde-3-phosphate dehydrogenase/erythros e-4-phosphate dehydrogenase [Termite Gut (version 3)] | Global / Soluble / Pellet / Supernatant             | 214 |             | COG0057 | G | pfam00044<br>pfam02800                                        | TIGR01534              | No  | No  |
| 2005624269 | 7 / 2 / 5 / 5         | Glyceraldehyde-3-phosphate dehydrogenase/erythros e-4-phosphate dehydrogenase [Termite Gut (version 3)] | Global / Soluble / Pellet / Supernatant             | 211 |             | COG0057 | G | pfam00044<br>pfam02800                                        | TIGR01534              | No  | No  |
| 2005630149 | 2                     | Glyceraldehyde-3-phosphate dehydrogenase/erythros e-4-phosphate dehydrogenase [Termite Gut (version 3)] | Pellet                                              | 225 |             | COG0057 | G | pfam00044<br>pfam02800                                        | TIGR01534              | No  | No  |
| 2005564120 | 3 / 3 / 3 / 2         | Glyceraldehyde-3-phosphate dehydrogenase/erythros e-4-phosphate dehydrogenase [Termite Gut (version 3)] | Global / Soluble / Pellet / Supernatant             | 180 |             | COG0057 | G | pfam02800                                                     | TIGR01534              | No  | No  |
| 2005596791 | 2                     | Glyceraldehyde-3-phosphate dehydrogenase/erythros e-4-phosphate dehydrogenase [Termite Gut (version 3)] | Supernatant                                         | 177 |             | COG0057 | G | pfam02800                                                     | TIGR01534              | No  | No  |
| 2005569044 | 3                     | Glycine/serine hydroxymethyltransferase [Termite Gut (version 3)]                                       | Soluble                                             | 135 |             | COG0112 | E | pfam00464                                                     |                        | No  | No  |
| 2005574422 | 2 / 2                 | Glycine/serine hydroxymethyltransferase [Termite Gut (version 3)]                                       | Soluble / Supernatant                               | 145 |             | COG0112 | E | pfam00464                                                     |                        | No  | No  |
| 2005564219 | 2                     | Glycyl-tRNA synthetase (class II) [Termite Gut (version 3)]                                             | Pellet                                              | 358 | EC:6.1.1.14 | COG0423 | J | pfam00587                                                     | TIGR00389              | No  | No  |
| 2005560140 | 4 / 2 / 4             | Glycyl-tRNA synthetase (class II) [Termite Gut (version 3)]                                             | Soluble / Pellet / Supernatant                      | 458 | EC:6.1.1.14 | COG0423 | J | pfam00587<br>pfam03129                                        | TIGR00389              | No  | No  |
| 2005597887 | 2                     | Glycyl-tRNA synthetase (class II) [Termite Gut (version 3)]                                             | Pellet                                              | 127 |             | COG0423 | J | pfam03129                                                     |                        | Yes | No  |
| 2005566441 | 6 / 4 / 8 / 11 / 8    | GTPases - translation elongation factors [Termite Gut (version 3)]                                      | Global / Insoluble / Soluble / Pellet / Supernatant | 360 | EC:3.6.5.3  | COG0050 | J | pfam00009<br>pfam03143<br>pfam03144                           | TIGR00231<br>TIGR00485 | No  | No  |
| 2005588687 | 3 / 2 / 4 / 2 / 4     | GTPases - translation elongation factors [Termite Gut (version 3)]                                      | Global / Insoluble / Soluble / Pellet / Supernatant | 396 | EC:3.6.5.3  | COG0050 | J | pfam00009<br>pfam03143<br>pfam03144                           | TIGR00231<br>TIGR00485 | No  | No  |
| 2005597781 | 2                     | GTPases - translation elongation factors [Termite Gut (version 3)]                                      | Global                                              | 160 |             | COG0050 | J | pfam00009                                                     | TIGR00231<br>TIGR00485 | Yes | No  |
| 2005599563 | 3 / 2 / 5 / 2         | GTPases - translation elongation factors [Termite Gut (version 3)]                                      | Global / Soluble / Pellet / Supernatant             | 220 |             | COG0050 | J | pfam00009                                                     | TIGR00231<br>TIGR00485 | No  | No  |
| 2005618592 | 2                     | GTPases - translation elongation factors [Termite Gut (version 3)]                                      | Soluble                                             | 221 |             | COG0050 | J | pfam00009                                                     | TIGR00231<br>TIGR00485 | No  | No  |
| 2005626517 | 2 / 2                 | GTPases - translation elongation factors [Termite Gut (version 3)]                                      | Pellet / Supernatant                                | 164 |             | COG0050 | J | pfam00009                                                     | TIGR00231<br>TIGR00485 | No  | No  |
| 2005594766 | 2 / 4 / 2             | GTPases - translation elongation factors [Termite Gut (version 3)]                                      | Global / Pellet / Supernatant                       | 285 |             | COG0050 | J | pfam00009<br>pfam03144                                        | TIGR00231<br>TIGR00485 | No  | No  |
| 2005563237 | 5 / 5 / 6 / 3         | GTPases - translation elongation factors [Termite Gut (version 3)]                                      | Global / Soluble / Pellet / Supernatant             | 296 | EC:3.6.5.3  | COG0050 | J | pfam00009<br>pfam03143<br>pfam03144                           | TIGR00485              | No  | No  |
| 2005602832 | 5 / 3 / 6 / 5         | GTPases - translation elongation factors [Termite Gut (version 3)]                                      | Global / Soluble / Pellet / Supernatant             | 296 |             | COG0050 | J | pfam00009<br>pfam03143<br>pfam03144                           | TIGR00485              | No  | No  |
| 2005626671 | 2                     | GTPases - translation elongation factors [Termite Gut (version 3)]                                      | Global                                              | 228 |             | COG0050 | J | pfam00009<br>pfam03144                                        | TIGR00485              | No  | No  |
| 2005581788 | 4 / 2                 | GTPases - translation elongation factors [Termite Gut (version 3)]                                      | Soluble / Supernatant                               | 396 | EC:3.6.5.3  | COG0050 | J | pfam00009<br>pfam03143<br>pfam03144                           | TIGR00485<br>TIGR00231 | No  | No  |
| 2005613118 | 2                     | GTPases - translation elongation factors [Termite Gut (version 3)]                                      | Pellet                                              | 210 |             | COG0050 | J | pfam00009                                                     | TIGR00485<br>TIGR00231 | No  | No  |
| 2005589254 | 3 / 3                 | GTPases - translation elongation factors [Termite Gut (version 3)]                                      | Global / Supernatant                                | 134 |             | COG0050 | J | pfam03143<br>pfam03144                                        |                        | No  | No  |
| 2005604349 | 2 / 2 / 3             | GTPases - translation elongation factors [Termite Gut (version 3)]                                      | Global / Soluble / Supernatant                      | 127 |             | COG0050 | J | pfam03143<br>pfam03144                                        |                        | No  | No  |
| 2005620096 | 2                     | Heterodisulfide reductase, subunit A and related polyferredoxins [Termite Gut (version 3)]              | Global                                              | 215 |             | COG1148 | C | pfam00037                                                     |                        | No  | No  |
| 2005620095 | 2                     | Heterodisulfide reductase, subunit A and related polyferredoxins [Termite Gut (version 3)]              | Pellet                                              | 276 |             | COG1148 | C |                                                               |                        | No  | No  |
| 2005573068 | 3                     | Hypothetical lipoprotein FN1590 [Termite Gut (version 3)]                                               | Pellet                                              | 358 |             |         |   |                                                               |                        | No  | No  |
| 2005580631 | 2                     | Hypothetical lipoprotein FN1899 [Termite Gut (version 3)]                                               | Pellet                                              | 408 |             |         |   |                                                               |                        | Yes | No  |
| 2005592594 | 4 / 4                 | Hypothetical lipoprotein FN1899 [Termite Gut (version 3)]                                               | Pellet / Supernatant                                | 386 |             |         |   |                                                               |                        | No  | No  |
| 2005599250 | 2                     | Hypothetical protein [Termite Gut (version 3)]                                                          | Pellet                                              | 177 |             |         |   | pfam03130                                                     |                        | No  | No  |
| 2005603110 | 2                     | Hypothetical protein [Termite Gut (version 3)]                                                          | Pellet                                              | 207 |             |         |   |                                                               |                        | No  | No  |
| 2005603687 | 2                     | Hypothetical protein [Termite Gut (version 3)]                                                          | Soluble                                             | 259 |             |         |   |                                                               |                        | Yes | No  |
| 2005618573 | 2                     | Hypothetical protein [Termite Gut (version 3)]                                                          | Pellet                                              | 201 |             |         |   |                                                               |                        | Yes | Yes |
| 2005562909 | 2                     | Hypothetical protein A110967 [Termite Gut (version 3)]                                                  | Soluble                                             | 488 |             |         |   |                                                               |                        | No  | No  |
| 2005562852 | 2 / 5 / 3 / 2         | Hypothetical protein CAC2564 [Termite Gut (version 3)]                                                  | Insoluble / Soluble / Pellet / Supernatant          | 332 |             |         |   |                                                               |                        | No  | No  |
| 2005574924 | 3                     | Hypothetical protein TP0608 [Termite Gut (version 3)]                                                   | Pellet                                              | 210 |             |         |   |                                                               |                        | No  | No  |
| 2005565767 | 2                     | Hypothetical protein TP0747 [Termite Gut (version 3)]                                                   | Pellet                                              | 281 |             |         |   |                                                               |                        | No  | No  |
| 2005570713 | 2                     | Hypothetical protein TP0747 [Termite Gut (version 3)]                                                   | Pellet                                              | 340 |             |         |   |                                                               |                        | No  | No  |
| 2005587648 | 2 / 2                 | Hypothetical protein TP0747 [Termite Gut (version 3)]                                                   | Insoluble / Supernatant                             | 373 |             |         |   |                                                               |                        | No  | No  |
| 2005563746 | 2                     | Hypothetical protein TTE2422 [Termite Gut (version 3)]                                                  | Supernatant                                         | 624 |             |         |   |                                                               |                        | No  | No  |
| 2005570081 | 2 / 3                 | Inorganic pyrophosphatase [Termite Gut (version 3)]                                                     | Insoluble / Supernatant                             | 576 | EC:3.6.1.1  | COG3808 | C | pfam03030                                                     |                        | Yes | Yes |
| 2005606195 | 4                     | Inorganic pyrophosphatase/exopolyphosphatase [Termite Gut (version 3)]                                  | Soluble                                             | 255 | EC:3.6.1.1  | COG1227 | C | pfam02833                                                     |                        | No  | No  |
| 2005568632 | 3                     | Iron only hydrogenase large subunit, C-terminal domain [Termite Gut (version 3)]                        | Pellet                                              | 583 | EC:1.6.5.3  | COG4624 | R | pfam00037<br>pfam00111<br>pfam02256<br>pfam02906<br>pfam10588 | TIGR02512              | No  | No  |
| 2005580141 | 3 / 2 / 2             | Iron only hydrogenase large subunit, C-terminal domain [Termite Gut (version 3)]                        | Soluble / Pellet / Supernatant                      | 598 | EC:1.6.5.3  | COG4624 | R | pfam00037<br>pfam00111<br>pfam02256<br>pfam02906<br>pfam10588 | TIGR02512              | No  | No  |

|            |               |                                                                                                 |                                           |     |             |         |     |                                                               |           |     |     |
|------------|---------------|-------------------------------------------------------------------------------------------------|-------------------------------------------|-----|-------------|---------|-----|---------------------------------------------------------------|-----------|-----|-----|
| 2005593775 | 2             | Iron only hydrogenase large subunit, C-terminal d omain [Termite Gut (version 3)]               | Pellet                                    | 661 | EC:1.6.5.3  | COG4624 | R   | pfam00037<br>pfam00111<br>pfam02256<br>pfam02906<br>pfam10588 | TIGR02512 | No  | No  |
| 2005562460 | 3 / 3 / 3     | Iron only hydrogenase large subunit, C-terminal d omain [Termite Gut (version 3)]               | Soluble / Pellet / Supernatant            | 560 | EC:1.6.5.3  | COG4624 | R   | pfam00037<br>pfam00111<br>pfam02906<br>pfam10588              | TIGR02512 | No  | No  |
| 2005576126 | 2 / 2         | Iron only hydrogenase large subunit, C-terminal d omain [Termite Gut (version 3)]               | Soluble / Supernatant                     | 535 | EC:1.6.5.3  | COG4624 | R   | pfam00037<br>pfam02256<br>pfam02906<br>pfam10588              | TIGR02512 | No  | No  |
| 2005564037 | 2 / 2         | Iron only hydrogenase large subunit, C-terminal d omain [Termite Gut (version 3)]               | Pellet / Supernatant                      | 237 |             | COG4624 | R   | pfam02256<br>pfam02906                                        |           | No  | No  |
| 2005577994 | 2             | Isocitrate/isopropylmalate dehydrogenase [Termite Gut (version 3)]                              | Soluble                                   | 145 |             | COG0473 | E C | pfam00180                                                     |           | No  | No  |
| 2005564443 | 2             | Ketol-acid reductoisomerase [Termite Gut (version 3)]                                           | Soluble                                   | 331 | EC:1.1.1.86 | COG0059 | H E | pfam01450<br>pfam03807                                        | TIGR00465 | Yes | No  |
| 2005565220 | 2             | Ketol-acid reductoisomerase [Termite Gut (version 3)]                                           | Pellet                                    | 334 | EC:1.1.1.86 | COG0059 | H E | pfam01450<br>pfam07991                                        | TIGR00465 | Yes | No  |
| 2005577992 | 3             | Ketol-acid reductoisomerase [Termite Gut (version 3)]                                           | Pellet                                    | 367 | EC:1.1.1.86 | COG0059 | H E | pfam01450<br>pfam07991                                        | TIGR00465 | No  | No  |
| 2005578224 | 2             | Ketol-acid reductoisomerase [Termite Gut (version 3)]                                           | Pellet                                    | 334 | EC:1.1.1.86 | COG0059 | E H | pfam01450<br>pfam07991                                        | TIGR00465 | No  | No  |
| 2005582393 | 6             | Ketol-acid reductoisomerase [Termite Gut (version 3)]                                           | Soluble                                   | 489 | EC:1.1.1.86 | COG0059 | E H | pfam01450<br>pfam07991                                        | TIGR00465 | No  | No  |
| 2005623514 | 2             | Ketol-acid reductoisomerase [Termite Gut (version 3)]                                           | Pellet                                    | 232 |             | COG0059 | E H | pfam01450<br>pfam07991                                        |           | No  | No  |
| 2005622955 | 4 / 2         | Lactoylglutathione lyase and related lyases [Termite Gut (version 3)]                           | Soluble / Pellet                          | 141 | EC:4.4.1.5  | COG3185 | E R | pfam00903                                                     | TIGR03081 | No  | No  |
| 2005582645 | 4             | Leucyl aminopeptidase (aminopeptidase T) [Termite Gut (version 3)]                              | Pellet                                    | 392 | EC:3.4.11.- | COG2309 | E   | pfam02073                                                     |           | No  | No  |
| 2005571094 | 2             | Lipoprotein, putative [Termite Gut (version 3)]                                                 | Global                                    | 260 |             |         |     |                                                               |           | No  | No  |
| 2005566709 | 2 / 2 / 4 / 4 | Major membrane protein I [Termite Gut (version 3)]                                              | Global / Insoluble / Pellet / Supernatant | 315 |             |         |     |                                                               |           | No  | No  |
| 2005567328 | 2             | Major membrane protein I [Termite Gut (version 3)]                                              | Supernatant                               | 315 |             |         |     |                                                               |           | No  | No  |
| 2005572015 | 2 / 4         | Major membrane protein I [Termite Gut (version 3)]                                              | Insoluble / Pellet                        | 316 |             |         |     |                                                               |           | No  | No  |
| 2005598431 | 5 / 4 / 4 / 3 | Malate/lactate dehydrogenases [Termite Gut (version 3)]                                         | Global / Soluble / Pellet / Supernatant   | 170 |             | COG0039 | C   | pfam00056                                                     |           | Yes | No  |
| 2005587870 | 3 / 4 / 2     | Maltose-binding periplasmic proteins/domains [Termite Gut (version 3)]                          | Global / Pellet / Supernatant             | 225 |             | COG2182 | G   | pfam01547                                                     |           | No  | No  |
| 2005581870 | 2             | Membrane lipoprotein TmpC, putative [Termite Gut (version 3)]                                   | Pellet                                    | 119 |             | COG1744 | R   | pfam02608                                                     |           | No  | No  |
| 2005562936 | 3             | Membrane protease subunits, stomatin/prohibitin homologs [Termite Gut (version 3)]              | Pellet                                    | 324 |             | COG0330 | O   | pfam01145                                                     | TIGR01932 | Yes | Yes |
| 2005562935 | 2             | Membrane protease subunits, stomatin/prohibitin homologs [Termite Gut (version 3)]              | Pellet                                    | 198 |             | COG0330 | O   | pfam01145                                                     | TIGR01933 | No  | No  |
| 2005572738 | 3 / 3         | Membrane protease subunits, stomatin/prohibitin homologs [Termite Gut (version 3)]              | Pellet / Supernatant                      | 304 |             | COG0330 | O   | pfam01145                                                     |           | Yes | Yes |
| 2005577156 | 2 / 4         | Membrane protease subunits, stomatin/prohibitin homologs [Termite Gut (version 3)]              | Pellet / Supernatant                      | 215 |             | COG0330 | O   | pfam01145                                                     |           | No  | No  |
| 2005573048 | 2             | Methionine synthase I (cobalamin-dependent), methyltransferase domain [Termite Gut (version 3)] | Soluble                                   | 287 |             | COG0646 | E   | pfam02574                                                     |           | No  | No  |
| 2005604928 | 3 / 2 / 7 / 7 | Methionine synthase I, cobalamin-binding domain [Termite Gut (version 3)]                       | Global / Soluble / Pellet / Supernatant   | 206 |             | COG1410 | E   | pfam00809                                                     |           | No  | No  |
| 2005584511 | 2             | Methyl-accepting chemotaxis protein [Termite Gut (version 3)]                                   | Global                                    | 562 |             | COG0840 | T N | pfam00015<br>pfam00672                                        | TIGR03057 | No  | Yes |
| 2005588775 | 2             | Methyl-accepting chemotaxis protein [Termite Gut (version 3)]                                   | Pellet                                    | 491 |             | COG0840 | T N | pfam00015<br>pfam00672                                        | TIGR03057 | No  | Yes |
| 2005560133 | 3 / 2 / 2 / 4 | Methyl-accepting chemotaxis protein [Termite Gut (version 3)]                                   | Global / Soluble / Pellet / Supernatant   | 308 |             | COG0840 | T N | pfam00015                                                     |           | Yes | Yes |
| 2005560195 | 2 / 2 / 2 / 2 | Methyl-accepting chemotaxis protein [Termite Gut (version 3)]                                   | Global / Insoluble / Pellet / Supernatant | 294 |             | COG0840 | T N | pfam00015                                                     |           | No  | No  |
| 2005560556 | 3 / 2 / 2     | Methyl-accepting chemotaxis protein [Termite Gut (version 3)]                                   | Global / Pellet / Supernatant             | 279 |             | COG0840 | N T | pfam00015                                                     |           | No  | No  |
| 2005560963 | 2             | Methyl-accepting chemotaxis protein [Termite Gut (version 3)]                                   | Global                                    | 297 |             | COG0840 | N T | pfam00015                                                     |           | No  | No  |
| 2005563682 | 2             | Methyl-accepting chemotaxis protein [Termite Gut (version 3)]                                   | Pellet                                    | 435 |             | COG0840 | T N | pfam00015                                                     |           | No  | No  |
| 2005565598 | 2             | Methyl-accepting chemotaxis protein [Termite Gut (version 3)]                                   | Pellet                                    | 343 |             | COG0840 | T N | pfam00015                                                     |           | Yes | Yes |
| 2005575195 | 2             | Methyl-accepting chemotaxis protein [Termite Gut (version 3)]                                   | Pellet                                    | 618 |             | COG0840 | N T | pfam00015                                                     |           | No  | Yes |
| 2005575629 | 2             | Methyl-accepting chemotaxis protein [Termite Gut (version 3)]                                   | Pellet                                    | 405 |             | COG0840 | N T | pfam00015                                                     |           | No  | Yes |
| 2005577086 | 2             | Methyl-accepting chemotaxis protein [Termite Gut (version 3)]                                   | Global                                    | 226 |             | COG0840 | N T | pfam00015                                                     |           | No  | No  |
| 2005592551 | 2 / 2         | Methyl-accepting chemotaxis protein [Termite Gut (version 3)]                                   | Pellet / Supernatant                      | 365 |             | COG0840 | T N | pfam00015                                                     |           | Yes | No  |
| 2005593931 | 3             | Methyl-accepting chemotaxis protein [Termite Gut (version 3)]                                   | Pellet                                    | 281 |             | COG0840 | T N | pfam00015                                                     |           | Yes | No  |
| 2005606081 | 2 / 2         | Methyl-accepting chemotaxis protein [Termite Gut (version 3)]                                   | Pellet / Supernatant                      | 226 |             | COG0840 | N T | pfam00015                                                     |           | No  | No  |
| 2005624787 | 2             | Methyl-accepting chemotaxis protein [Termite Gut (version 3)]                                   | Pellet                                    | 244 |             | COG0840 | T N | pfam00015                                                     |           | No  | No  |
| 2005561557 | 2             | Methyl-accepting chemotaxis protein [Termite Gut (version 3)]                                   | Supernatant                               | 845 |             | COG0840 | T N | pfam00015<br>pfam00072<br>pfam00672                           |           | No  | Yes |
| 2005583703 | 2             | Methyl-accepting chemotaxis protein [Termite Gut (version 3)]                                   | Pellet                                    | 857 |             | COG0840 | T N | pfam00015<br>pfam00072<br>pfam00672<br>pfam02743              |           | Yes | Yes |
| 2005560154 | 2 / 3 / 3 / 3 | Methyl-accepting chemotaxis protein [Termite Gut (version 3)]                                   | Global / Insoluble / Pellet / Supernatant | 447 |             | COG0840 | T N | pfam00015<br>pfam00672                                        |           | No  | Yes |
| 2005561992 | 2 / 3 / 3     | Methyl-accepting chemotaxis protein [Termite Gut (version 3)]                                   | Global / Pellet / Supernatant             | 671 |             | COG0840 | N T | pfam00015<br>pfam00672                                        |           | No  | Yes |
| 2005562034 | 2 / 2 / 3     | Methyl-accepting chemotaxis protein [Termite Gut (version 3)]                                   | Global / Pellet / Supernatant             | 533 |             | COG0840 | T N | pfam00015<br>pfam00672                                        |           | No  | Yes |
| 2005562105 | 2             | Methyl-accepting chemotaxis protein [Termite Gut (version 3)]                                   | Pellet                                    | 335 |             | COG0840 | T N | pfam00015<br>pfam00672                                        |           | No  | No  |
| 2005563995 | 2             | Methyl-accepting chemotaxis protein [Termite Gut (version 3)]                                   | Pellet                                    | 484 |             | COG0840 | T N | pfam00015<br>pfam00672                                        |           | No  | Yes |
| 2005567829 | 2             | Methyl-accepting chemotaxis protein [Termite Gut (version 3)]                                   | Pellet                                    | 387 |             | COG0840 | T N | pfam00015<br>pfam00672                                        |           | No  | Yes |
| 2005571439 | 2 / 2         | Methyl-accepting chemotaxis protein [Termite Gut (version 3)]                                   | Global / Supernatant                      | 387 |             | COG0840 | T N | pfam00015<br>pfam00672                                        |           | No  | Yes |
| 2005571631 | 5 / 11 / 6    | Methyl-accepting chemotaxis protein [Termite Gut (version 3)]                                   | Global / Pellet / Supernatant             | 607 |             | COG0840 | T N | pfam00015<br>pfam00672                                        |           | Yes | Yes |
| 2005572310 | 3             | Methyl-accepting chemotaxis protein [Termite Gut (version 3)]                                   | Pellet                                    | 478 |             | COG0840 | T N | pfam00015<br>pfam00672                                        |           | No  | Yes |
| 2005574281 | 2             | Methyl-accepting chemotaxis protein [Termite Gut (version 3)]                                   | Supernatant                               | 485 |             | COG0840 | T N | pfam00015<br>pfam00672                                        |           | No  | Yes |
| 2005576582 | 2 / 5 / 2     | Methyl-accepting chemotaxis protein [Termite Gut (version 3)]                                   | Global / Pellet / Supernatant             | 485 |             | COG0840 | N T | pfam00015<br>pfam00672                                        |           | Yes | Yes |
| 2005577001 | 2 / 4 / 2     | Methyl-accepting chemotaxis protein [Termite Gut (version 3)]                                   | Global / Pellet / Supernatant             | 436 |             | COG0840 | T N | pfam00015<br>pfam00672                                        |           | Yes | Yes |
| 2005577030 | 2             | Methyl-accepting chemotaxis protein [Termite Gut (version 3)]                                   | Supernatant                               | 484 |             | COG0840 | T N | pfam00015<br>pfam00672                                        |           | No  | Yes |
| 2005577262 | 2             | Methyl-accepting chemotaxis protein [Termite Gut (version 3)]                                   | Supernatant                               | 731 |             | COG0840 | N T | pfam00015<br>pfam00672                                        |           | Yes | Yes |
| 2005577628 | 2 / 2 / 2     | Methyl-accepting chemotaxis protein [Termite Gut (version 3)]                                   | Global / Pellet / Supernatant             | 410 |             | COG0840 | N T | pfam00015<br>pfam00672                                        |           | Yes | Yes |
| 2005581986 | 2             | Methyl-accepting chemotaxis protein [Termite Gut (version 3)]                                   | Pellet                                    | 596 |             | COG0840 | T N | pfam00015<br>pfam00672                                        |           | No  | Yes |
| 2005584215 | 2 / 2         | Methyl-accepting chemotaxis protein [Termite Gut (version 3)]                                   | Global / Pellet                           | 619 |             | COG0840 | N T | pfam00015<br>pfam00672                                        |           | No  | Yes |
| 2005587810 | 6             | Methyl-accepting chemotaxis protein [Termite Gut (version 3)]                                   | Pellet                                    | 560 |             | COG0840 | T N | pfam00015<br>pfam00672                                        |           | Yes | Yes |
| 2005588846 | 2             | Methyl-accepting chemotaxis protein [Termite Gut (version 3)]                                   | Supernatant                               | 620 |             | COG0840 | T N | pfam00015<br>pfam00672                                        |           | No  | Yes |

|            |                   |                                                                                                       |                                                     |     |                        |         |     |                                     |                        |     |     |
|------------|-------------------|-------------------------------------------------------------------------------------------------------|-----------------------------------------------------|-----|------------------------|---------|-----|-------------------------------------|------------------------|-----|-----|
| 2005589214 | 2 / 3             | Methyl-accepting chemotaxis protein [Termite Gut (version 3)]                                         | Pellet / Supernatant                                | 520 |                        | COG0840 | N T | pfam00015<br>pfam00672              |                        | No  | Yes |
| 2005593367 | 2                 | Methyl-accepting chemotaxis protein [Termite Gut (version 3)]                                         | Pellet                                              | 480 |                        | COG0840 | N T | pfam00015<br>pfam00672              |                        | No  | Yes |
| 2005561990 | 2 / 2             | Methyl-accepting chemotaxis protein [Termite Gut (version 3)]                                         | Pellet / Supernatant                                | 433 |                        | COG0840 | T N | pfam00015<br>pfam00672<br>pfam02743 |                        | No  | Yes |
| 2005610793 | 2                 | Methyl-accepting chemotaxis protein [Termite Gut (version 3)]                                         | Pellet                                              | 267 |                        | COG0840 | T N | pfam00672                           |                        | No  | Yes |
| 2005632265 | 2                 | Methyl-accepting chemotaxis protein [Termite Gut (version 3)]                                         | Pellet                                              | 276 |                        | COG3850 | T   | pfam00672                           |                        | Yes | Yes |
| 2005571457 | 2                 | Methyl-accepting chemotaxis protein [Termite Gut (version 3)]                                         | supernatant                                         | 143 |                        |         |     |                                     |                        | No  | No  |
| 2005597275 | 2 / 2             | Methyl-accepting chemotaxis protein [Termite Gut (version 3)]                                         | Pellet / Supernatant                                | 296 |                        |         |     |                                     |                        | No  | No  |
| 2005583506 | 2                 | Methylmalonyl-CoA mutase, N-terminal domain/subunit it [Termite Gut (version 3)]                      | Soluble                                             | 360 |                        | COG1884 | I   | pfam01642                           | TIGR00641              | Yes | No  |
| 2005623591 | 2 / 6 / 5 / 7     | Methylmalonyl-CoA mutase, N-terminal domain/subunit it [Termite Gut (version 3)]                      | Global / Soluble / Pellet / Supernatant             | 252 |                        | COG1884 | I   | pfam01642                           |                        | No  | No  |
| 2005566086 | 2                 | Mg-dependent DNase [Termite Gut (version 3)]                                                          | Pellet                                              | 258 | EC:3.1.21.-            | COG0084 | L   | pfam01026                           | TIGR00010              | No  | No  |
| 2005567198 | 2                 | Mg-dependent DNase [Termite Gut (version 3)]                                                          | Soluble                                             | 232 | EC:3.1.21.-            | COG0084 | L   | pfam01026                           | TIGR00010              | No  | No  |
| 2005587423 | 2                 | Molecular chaperone [Termite Gut (version 3)]                                                         | Pellet                                              | 645 | EC:3.6.1.-             | COG0443 | O   | pfam00012                           | TIGR02350              | No  | No  |
| 2005563129 | 5 / 3 / 3         | Molecular chaperone [Termite Gut (version 3)]                                                         | Soluble / Pellet / Supernatant                      | 437 |                        | COG0443 | O   | pfam00012                           | TIGR02350              | No  | No  |
| 2005575546 | 4 / 3             | Molecular chaperone [Termite Gut (version 3)]                                                         | Soluble / Pellet                                    | 639 | EC:3.6.1.-             | COG0443 | O   | pfam00012                           | TIGR02350<br>TIGR01435 | No  | No  |
| 2005584942 | 2                 | Molecular chaperone [Termite Gut (version 3)]                                                         | Pellet                                              | 638 | EC:3.6.1.-             | COG0443 | O   | pfam00012                           | TIGR02350<br>TIGR01435 | No  | No  |
| 2005565901 | 2                 | Molecular chaperone [Termite Gut (version 3)]                                                         | Soluble                                             | 250 |                        | COG0443 | O   | pfam00012                           |                        | No  | No  |
| 2005573201 | 2 / 2             | Molecular chaperone [Termite Gut (version 3)]                                                         | Soluble / Supernatant                               | 397 |                        | COG0443 | O   | pfam00012                           |                        | No  | No  |
| 2005584076 | 2                 | Molecular chaperone [Termite Gut (version 3)]                                                         | Pellet                                              | 396 |                        | COG0443 | O   | pfam00012                           |                        | Yes | No  |
| 2005588859 | 3                 | Molecular chaperone [Termite Gut (version 3)]                                                         | Soluble                                             | 347 |                        | COG0443 | O   | pfam00012                           |                        | No  | No  |
| 2005597468 | 2                 | Molecular chaperone [Termite Gut (version 3)]                                                         | Pellet                                              | 293 |                        | COG0443 | O   | pfam00012                           |                        | No  | No  |
| 2005562960 | 2                 | Molecular chaperone, HSP90 family [Termite Gut (version 3)]                                           | Supernatant                                         | 501 | EC:3.6.4.9             | COG0326 | O   | pfam00183<br>pfam02518              |                        | No  | No  |
| 2005570640 | 2                 | NAD-dependent aldehyde dehydrogenases [Termite Gut (version 3)]                                       | Supernatant                                         | 867 | EC:1.1.1.1 EC:1.2.1.10 | COG1454 | C   | pfam00171<br>pfam00465              |                        | No  | No  |
| 2005573383 | 2                 | NAD-dependent aldehyde dehydrogenases [Termite Gut (version 3)]                                       | supernatant                                         | 815 | EC:1.1.1.1 EC:1.2.1.10 | COG1454 | C   | pfam00465                           |                        | No  | No  |
| 2005586726 | 2                 | NAD-dependent aldehyde dehydrogenases [Termite Gut (version 3)]                                       | Soluble                                             | 382 | EC:1.2.1.16            | COG1012 | C   | pfam00171                           |                        | No  | No  |
| 2005571549 | 3                 | NAD-dependent aldehyde dehydrogenases [Termite Gut (version 3)]                                       | Soluble                                             | 258 |                        | COG1012 | C   | pfam00171                           |                        | No  | No  |
| 2005561303 | 3                 | NAD-dependent aldehyde dehydrogenases [Termite Gut (version 3)]                                       | Pellet                                              | 488 |                        | COG1012 | C   | pfam00465                           |                        | Yes | No  |
| 2005594378 | 2 / 2             | NADH dehydrogenase dehydrogenase [Termite Gut (version 3)]                                            | Pellet / Supernatant                                | 604 | EC:1.6.5.3             | COG1894 | C   | pfam01512<br>pfam10531<br>pfam10589 |                        | No  | No  |
| 2005568633 | 5 / 2 / 5 / 6 / 4 | NADH dehydrogenase [Termite Gut (version 3)]                                                          | Global / Insoluble / Soluble / Pellet / Supernatant | 501 | EC:1.6.5.3 EC:1.6.99.5 | COG1894 | C   | pfam01512<br>pfam10531<br>pfam10589 |                        | No  | No  |
| 2005569582 | 3                 | NADH dehydrogenase [Termite Gut (version 3)]                                                          | Pellet                                              | 480 | EC:1.6.5.3 EC:1.6.99.5 | COG1894 | C   | pfam01512<br>pfam10531<br>pfam10589 |                        | No  | No  |
| 2005576124 | 2 / 3             | NADH dehydrogenase [Termite Gut (version 3)]                                                          | Soluble / Pellet                                    | 532 | EC:1.6.5.3 EC:1.6.99.5 | COG1894 | C   | pfam01512<br>pfam10531<br>pfam10589 |                        | No  | No  |
| 2005580122 | 2                 | NADH dehydrogenase [Termite Gut (version 3)]                                                          | Pellet                                              | 505 | EC:1.6.5.3 EC:1.6.99.5 | COG1894 | C   | pfam01512<br>pfam10531<br>pfam10589 |                        | No  | No  |
| 2005581519 | 2                 | NADH dehydrogenase [Termite Gut (version 3)]                                                          | Pellet                                              | 285 |                        | COG1894 | C   | pfam00037<br>pfam10531<br>pfam10589 |                        | No  | No  |
| 2005560274 | 2                 | NADH dehydrogenase [Termite Gut (version 3)]                                                          | Pellet                                              | 320 |                        | COG1894 | C   | pfam01512                           |                        | No  | No  |
| 2005620597 | 2 / 2             | NADH dehydrogenase [Termite Gut (version 3)]                                                          | Soluble / Pellet                                    | 190 |                        | COG1894 | C   |                                     |                        | No  | No  |
| 2005568110 | 2                 | NADH dehydrogenase [Termite Gut (version 3)]                                                          | Pellet                                              | 142 |                        | COG3411 | C   |                                     |                        | No  | No  |
| 2005562851 | 2 / 3 / 3         | NiU homolog involved in Fe-S cluster formation [Termite Gut (version 3)]                              | Global / Soluble / Supernatant                      | 134 |                        |         |     |                                     |                        | No  | No  |
| 2005560224 | 3                 | Nitrogen regulatory protein PII [Termite Gut (version 3)]                                             | Pellet                                              | 131 |                        | COG0347 | E   | pfam00543                           |                        | No  | No  |
| 2005565551 | 3 / 2 / 3         | Nitrogen regulatory protein PII [Termite Gut (version 3)]                                             | Soluble / Pellet / Supernatant                      | 114 |                        | COG0347 | E   | pfam00543                           |                        | No  | No  |
| 2005573268 | 2 / 3 / 2         | Nitrogen regulatory protein PII [Termite Gut (version 3)]                                             | Global / Soluble / Supernatant                      | 70  |                        | COG0347 | E   | pfam00543                           |                        | No  | No  |
| 2005590496 | 3                 | Nitrogen regulatory protein PII [Termite Gut (version 3)]                                             | Pellet                                              | 107 |                        | COG0347 | E   | pfam00543                           |                        | No  | No  |
| 2005591093 | 2 / 2             | Nitrogen regulatory protein PII [Termite Gut (version 3)]                                             | Pellet / Supernatant                                | 134 |                        | COG0347 | E   | pfam00543                           |                        | No  | No  |
| 2005615906 | 2 / 3             | Nitrogen regulatory protein PII [Termite Gut (version 3)]                                             | Global / Pellet                                     | 216 |                        | COG0347 | E   | pfam00543<br>pfam00909              |                        | Yes | Yes |
| 2005560225 | 2 / 3             | Nitrogenase molybdenum-iron protein, alpha and beta chains [Termite Gut (version 3)]                  | Soluble / Pellet                                    | 551 | EC:1.18.6.1            | COG2710 | C   | pfam00148                           | TIGR01282<br>TIGR01862 | No  | No  |
| 2005560226 | 2                 | Nitrogenase molybdenum-iron protein, alpha and beta chains [Termite Gut (version 3)]                  | Supernatant                                         | 372 | EC:1.18.6.1            | COG2710 | C   | pfam00148                           |                        | No  | No  |
| 2005577146 | 2                 | Nitrogenase molybdenum-iron protein, alpha and beta chains [Termite Gut (version 3)]                  | Pellet                                              | 320 |                        | COG2710 | C   | pfam00148                           |                        | No  | No  |
| 2005574073 | 6 / 7 / 4         | Nitrogenase subunit NiH (ATPase) [Termite Gut (version 3)]                                            | Global / Pellet / Supernatant                       | 272 | EC:1.18.6.1            | COG1348 | P   | pfam00142                           | TIGR01287              | No  | No  |
| 2005590497 | 2 / 3 / 3 / 2     | Nitrogenase subunit NiH (ATPase) [Termite Gut (version 3)]; Duplicate proteins: 2005591095            | Insoluble / Soluble / Pellet / Supernatant          | 191 |                        | COG1348 | P   | pfam00142                           | TIGR01287              | No  | No  |
| 2005571806 | 2 / 2             | Nucleoside diphosphate kinase [Termite Gut (version 3)]                                               | Soluble / Pellet                                    | 150 | EC:2.7.4.6             | COG1015 | F   | pfam00334                           |                        | Yes | No  |
| 2005565048 | 2 / 2 / 2         | O-acetylhomoserine sulphydrylase [Termite Gut (version 3)]                                            | Soluble / Pellet / Supernatant                      | 395 | EC:1.4.1.1 EC:2.5.1.49 | COG2873 | E   | pfam01053                           | TIGR01326              | No  | No  |
| 2005591832 | 4 / 2 / 3         | O-acetylhomoserine sulphydrylase [Termite Gut (version 3)]                                            | Soluble / Pellet / Supernatant                      | 411 | EC:1.4.1.1 EC:2.5.1.49 | COG2873 | E   | pfam01053                           | TIGR01326              | Yes | No  |
| 2005574230 | 2                 | Ornithine carbamoyltransferase [Termite Gut (version 3)]                                              | Pellet                                              | 165 |                        | COG0078 | E   |                                     |                        | No  | No  |
| 2005586362 | 4 / 3 / 2         | Outer membrane protein and related peptidoglycan- associated (lipo)proteins [Termite Gut (version 3)] | Global / Pellet / Supernatant                       | 179 |                        | COG2885 | M   | pfam00691                           | TIGR02802              | Yes | No  |
| 2005607130 | 2 / 3             | Outer membrane protein and related peptidoglycan- associated (lipo)proteins [Termite Gut (version 3)] | Soluble / Pellet                                    | 164 |                        | COG2885 | M   | pfam00691                           |                        | No  | No  |
| 2005632230 | 3 / 2             | Outer membrane protein and related peptidoglycan- associated (lipo)proteins [Termite Gut (version 3)] | Soluble / Pellet                                    | 197 |                        | COG2885 | M   | pfam00691                           |                        | No  | No  |
| 2005623806 | 2                 | Periplasmic protease [Termite Gut (version 3)]                                                        | Pellet                                              | 263 |                        | COG0793 | M   | pfam03572                           |                        | No  | No  |
| 2005627637 | 2                 | Phosphate uptake regulator [Termite Gut (version 3)]                                                  | supernatant                                         | 225 |                        | COG0704 | P   | pfam01895                           | TIGR02135              | No  | No  |
| 2005574718 | 4 / 17 / 6 / 11   | Phosphoenolpyruvate carboxykinase (GTP) [Termite Gut (version 3)]                                     | Global / Soluble / Pellet / Supernatant             | 600 | EC:4.1.1.32            | COG1274 | C   | pfam00821                           |                        | No  | No  |
| 2005574889 | 3 / 2 / 6 / 5     | Phosphoenolpyruvate carboxykinase (GTP) [Termite Gut (version 3)]                                     | Global / Soluble / Pellet / Supernatant             | 543 | EC:4.1.1.32            | COG1274 | C   | pfam00821                           |                        | No  | No  |
| 2005593944 | 2 / 2             | Phosphoenolpyruvate carboxykinase (GTP) [Termite Gut (version 3)]                                     | Pellet / Supernatant                                | 449 | EC:4.1.1.32            | COG1274 | C   | pfam00821                           |                        | No  | No  |
| 2005564687 | 2 / 2             | Phosphoenolpyruvate carboxykinase (GTP) [Termite Gut (version 3)]                                     | Soluble / Supernatant                               | 98  |                        | COG1274 | C   | pfam00821                           |                        | No  | No  |
| 2005574630 | 6 / 3 / 4         | Phosphoenolpyruvate carboxykinase (GTP) [Termite Gut (version 3)]                                     | Soluble / Pellet / Supernatant                      | 235 |                        | COG1274 | C   | pfam00821                           |                        | No  | No  |
| 2005574631 | 3 / 2 / 4         | Phosphoenolpyruvate carboxykinase (GTP) [Termite Gut (version 3)]                                     | Soluble / Pellet / Supernatant                      | 155 |                        | COG1274 | C   | pfam00821                           |                        | Yes | No  |
| 2005581220 | 3 / 4 / 2         | Phosphoenolpyruvate carboxykinase (GTP) [Termite Gut (version 3)]                                     | Global / Soluble / Supernatant                      | 276 |                        | COG1274 | C   | pfam00821                           |                        | No  | No  |
| 2005589420 | 3 / 3 / 4         | Phosphoenolpyruvate carboxykinase (GTP) [Termite Gut (version 3)]                                     | Global / Soluble / Supernatant                      | 417 |                        | COG1274 | C   | pfam00821                           |                        | No  | No  |
| 2005596347 | 3                 | Phosphoenolpyruvate carboxykinase (GTP) [Termite Gut (version 3)]                                     | Soluble                                             | 267 |                        | COG1274 | C   | pfam00821                           |                        | No  | No  |
| 2005608577 | 3 / 2 / 3         | Phosphoenolpyruvate carboxykinase (GTP) [Termite Gut (version 3)]                                     | Soluble / Pellet / Supernatant                      | 310 |                        | COG1274 | C   | pfam00821                           |                        | No  | No  |
| 2005627748 | 2                 | Phosphoenolpyruvate carboxykinase (GTP) [Termite Gut (version 3)]                                     | Soluble                                             | 275 |                        | COG1274 | C   | pfam00821                           |                        | No  | No  |
| 2005561153 | 7 / 2 / 10 / 6    | Phosphoenolpyruvate synthase/pyruvate phosphate dikinase [Termite Gut (version 3)]                    | Global / Insoluble / Pellet / Supernatant           | 706 | EC:2.7.9.1             | COG0574 | G   | pfam00391<br>pfam01326<br>pfam02896 | TIGR01828              | No  | No  |
| 2005570714 | 3                 | Phosphoenolpyruvate synthase/pyruvate phosphate dikinase [Termite Gut (version 3)]                    | Supernatant                                         | 896 | EC:2.7.9.1             | COG0574 | G   | pfam00391<br>pfam01326<br>pfam02896 | TIGR01828              | No  | No  |
| 2005563106 | 4 / 3             | Phosphoenolpyruvate synthase/pyruvate phosphate dikinase [Termite Gut (version 3)]                    | Pellet / Supernatant                                | 391 |                        | COG0574 | G   | pfam00391<br>pfam01326              | TIGR01828              | No  | No  |
| 2005572679 | 3                 | Phosphoenolpyruvate synthase/pyruvate phosphate dikinase [Termite Gut (version 3)]                    | Pellet                                              | 509 |                        | COG0574 | G   | pfam00391<br>pfam01326              | TIGR01828              | No  | No  |



|            |                     |                                                                                                      |                                                     |     |              |         |     |                                                               |                        |     |     |
|------------|---------------------|------------------------------------------------------------------------------------------------------|-----------------------------------------------------|-----|--------------|---------|-----|---------------------------------------------------------------|------------------------|-----|-----|
| 2005576674 | 10 / 2 / 15 / 7     | Phosphoenolpyruvate synthase/pyruvate phosphate dikinase [Termite Gut (version 3)]                   | Global / Insoluble / Pellet / Supernatant           | 618 |              | COG0574 | G   | pfam00391<br>pfam01326<br>pfam02896                           | TIGR01828              | No  | No  |
| 2005582631 | 4 / 2               | Phosphoenolpyruvate synthase/pyruvate phosphate dikinase [Termite Gut (version 3)]                   | Pellet / Supernatant                                | 631 |              | COG0574 | G   | pfam00391<br>pfam01326<br>pfam02896                           | TIGR01828              | No  | No  |
| 2005562387 | 3 / 3               | Phosphoenolpyruvate synthase/pyruvate phosphate dikinase [Termite Gut (version 3)]                   | Pellet / Supernatant                                | 451 |              | COG0574 | G   | pfam00391<br>pfam02896                                        | TIGR01828              | No  | No  |
| 2005577393 | 2 / 8 / 5           | Phosphoenolpyruvate synthase/pyruvate phosphate dikinase [Termite Gut (version 3)]                   | Global / Pellet / Supernatant                       | 512 |              | COG0574 | G   | pfam00391<br>pfam02896                                        | TIGR01828              | No  | No  |
| 2005576673 | 3 / 5 / 3           | Phosphoenolpyruvate synthase/pyruvate phosphate dikinase [Termite Gut (version 3)]                   | Global / Pellet / Supernatant                       | 409 |              | COG0574 | G   | pfam02896                                                     | TIGR01828              | No  | No  |
| 2005625137 | 2                   | Phosphoenolpyruvate synthase/pyruvate phosphate dikinase [Termite Gut (version 3)]                   | Supernatant                                         | 268 |              | COG0574 | G   | pfam00391<br>pfam01326                                        |                        | No  | No  |
| 2005617799 | 2 / 4 / 2           | Phosphoenolpyruvate synthase/pyruvate phosphate dikinase [Termite Gut (version 3)]                   | Global / Pellet / Supernatant                       | 287 |              | COG0574 | G   | pfam00391<br>pfam02896                                        |                        | Yes | No  |
| 2005615740 | 2                   | Phosphoenolpyruvate synthase/pyruvate phosphate dikinase [Termite Gut (version 3)]                   | Pellet                                              | 269 |              | COG0574 | G   | pfam01326                                                     |                        | No  | No  |
| 2005565379 | 2                   | Phosphoenolpyruvate synthase/pyruvate phosphate dikinase [Termite Gut (version 3)]                   | Pellet                                              | 212 |              | COG0574 | G   | pfam02896                                                     |                        | No  | No  |
| 2005573214 | 3 / 2 / 6 / 4       | Phosphoenolpyruvate synthase/pyruvate phosphate dikinase [Termite Gut (version 3)]                   | Global / Insoluble / Pellet / Supernatant           | 365 |              | COG0574 | G   | pfam02896                                                     |                        | No  | No  |
| 2005582630 | 4                   | Phosphoenolpyruvate synthase/pyruvate phosphate dikinase [Termite Gut (version 3)]                   | Pellet                                              | 326 |              | COG0574 | G   | pfam02896                                                     |                        | No  | No  |
| 2005596687 | 2 / 3               | Phosphoenolpyruvate synthase/pyruvate phosphate dikinase [Termite Gut (version 3)]                   | Global / Pellet                                     | 136 |              | COG0574 | G   | pfam02896                                                     |                        | No  | No  |
| 2005603185 | 3                   | Phosphoenolpyruvate synthase/pyruvate phosphate dikinase [Termite Gut (version 3)]                   | Pellet                                              | 287 |              | COG0574 | G   | pfam02896                                                     |                        | No  | No  |
| 2005615741 | 2                   | Phosphoenolpyruvate synthase/pyruvate phosphate dikinase [Termite Gut (version 3)]                   | Pellet                                              | 268 |              | COG0574 | G   | pfam02896                                                     |                        | No  | No  |
| 2005569040 | 2                   | Phosphoglycerate dehydrogenase and related dehydrogenases [Termite Gut (version 3)]                  | Soluble                                             | 386 | EC:1.1.1.95  | COG0111 | H E | pfam02826                                                     |                        | No  | No  |
| 2005575139 | 2                   | Phosphoglycerate dehydrogenase and related dehydrogenases [Termite Gut (version 3)]                  | Soluble                                             | 322 | EC:1.1.1.95  | COG0111 | H E | pfam02826                                                     |                        | No  | No  |
| 2005578803 | 2 / 4 / 3           | Phosphoglyceromutase [Termite Gut (version 3)]                                                       | Global / Soluble / Supernatant                      | 560 | EC:5.4.2.1   | COG0696 | G   | pfam01676<br>pfam06415                                        | TIGR01307              | No  | No  |
| 2005569106 | 2 / 2               | Phosphoglyceromutase [Termite Gut (version 3)]                                                       | Soluble / Pellet                                    | 213 |              | COG0696 | G   | pfam01676<br>pfam06415                                        | TIGR01307              | No  | No  |
| 2005573878 | 6 / 2               | Phosphoglyceromutase [Termite Gut (version 3)]                                                       | Soluble / Supernatant                               | 409 |              | COG0696 | G   | pfam01676<br>pfam06415                                        | TIGR01307              | No  | No  |
| 2005609579 | 2                   | Phosphoglyceromutase [Termite Gut (version 3)]                                                       | Soluble                                             | 278 |              | COG0696 | G   | pfam06415                                                     | TIGR01307              | No  | No  |
| 2005582017 | 2                   | Phosphoserine aminotransferase [Termite Gut (version 3)]                                             | Soluble                                             | 360 | EC:2.6.1.52  | COG1932 | E H | pfam00266                                                     | TIGR01364              | Yes | No  |
| 2005567203 | 2                   | Phosphoserine aminotransferase [Termite Gut (version 3)]                                             | Supernatant                                         | 221 |              | COG1932 | E H | pfam00266                                                     | TIGR01364              | No  | No  |
| 2005607979 | 2                   | Phosphoserine aminotransferase [Termite Gut (version 3)]                                             | Soluble                                             | 228 |              | COG1932 | H E | pfam00266                                                     | TIGR01364              | No  | No  |
| 2005564217 | 3 / 3               | Phosphotransacetylase [Termite Gut (version 3)]                                                      | Soluble / Supernatant                               | 317 | EC:2.3.1.8   | COG0280 | C   | pfam01515                                                     | TIGR00651              | No  | No  |
| 2005566988 | 2 / 2               | Phosphotransacetylase [Termite Gut (version 3)]                                                      | Soluble / Pellet                                    | 176 |              | COG0280 | C   | pfam01515                                                     | TIGR00651              | No  | No  |
| 2005624339 | 2                   | Phosphotransacetylase [Termite Gut (version 3)]                                                      | Supernatant                                         | 177 |              | COG0280 | C   | pfam01515                                                     | TIGR00651              | No  | No  |
| 2005564215 | 3                   | Phosphotransacetylase [Termite Gut (version 3)]                                                      | Soluble                                             | 107 |              | COG0280 | C   | pfam01515                                                     |                        | No  | No  |
| 2005589441 | 2                   | Phosphotransacetylase [Termite Gut (version 3)]                                                      | Soluble                                             | 168 |              | COG0280 | C   | pfam01515                                                     |                        | No  | No  |
| 2005593031 | 2                   | Phosphotransferase system mannitol/fructose-specific IIA domain (Ntr-type) [Termite Gut (version 3)] | supernatant                                         | 133 | EC:2.7.1.69  | COG1762 | T G | pfam00359                                                     |                        | Yes | No  |
| 2005567432 | 2 / 2               | Phosphotransferase system mannitol/fructose-specific IIA domain (Ntr-type) [Termite Gut (version 3)] | Soluble / Supernatant                               | 104 |              | COG1762 | T G | pfam00359                                                     |                        | No  | No  |
| 2005560479 | 2 / 3 / 4 / 2       | Polyribonucleotide nucleotidyltransferase (polynucleotide phosphorylase) [Termite Gut (version 3)]   | Insoluble / Soluble / Pellet / Supernatant          | 587 | EC:2.7.7.8   | COG1185 | J   | pfam00013<br>pfam00575<br>pfam01138<br>pfam03725<br>pfam03726 |                        | No  | No  |
| 2005564352 | 3                   | Polyribonucleotide nucleotidyltransferase (polynucleotide phosphorylase) [Termite Gut (version 3)]   | Pellet                                              | 605 | EC:2.7.7.8   | COG1185 | J   | pfam00013<br>pfam00575<br>pfam01138<br>pfam03725<br>pfam03726 |                        | No  | No  |
| 2005594157 | 2                   | Polyribonucleotide nucleotidyltransferase (polynucleotide phosphorylase) [Termite Gut (version 3)]   | Pellet                                              | 618 | EC:2.7.7.8   | COG1185 | J   | pfam00013<br>pfam01138<br>pfam03725<br>pfam03726              |                        | No  | No  |
| 2005564462 | 3 / 4 / 3           | Polyribonucleotide nucleotidyltransferase (polynucleotide phosphorylase) [Termite Gut (version 3)]   | Soluble / Pellet / Supernatant                      | 457 |              | COG1185 | J   | pfam00013<br>pfam00575<br>pfam01138<br>pfam03725<br>pfam03726 |                        | No  | No  |
| 2005575101 | 2 / 2               | Polyribonucleotide nucleotidyltransferase (polynucleotide phosphorylase) [Termite Gut (version 3)]   | Soluble / Pellet                                    | 375 |              | COG1185 | J   | pfam00013<br>pfam01138<br>pfam03725<br>pfam03726              |                        | No  | No  |
| 2005595534 | 3 / 5 / 2           | Polyribonucleotide nucleotidyltransferase (polynucleotide phosphorylase) [Termite Gut (version 3)]   | Soluble / Pellet / Supernatant                      | 378 |              | COG1185 | J   | pfam00013<br>pfam01138<br>pfam03725<br>pfam03726              |                        | No  | No  |
| 2005560475 | 3                   | Polyribonucleotide nucleotidyltransferase (polynucleotide phosphorylase) [Termite Gut (version 3)]   | Pellet                                              | 105 |              | COG1185 | J   | pfam00575                                                     |                        | No  | No  |
| 2005560507 | 2 / 3               | Polyribonucleotide nucleotidyltransferase (polynucleotide phosphorylase) [Termite Gut (version 3)]   | Soluble / Pellet                                    | 443 |              | COG1185 | J   | pfam01138<br>pfam03725<br>pfam03726                           |                        | No  | No  |
| 2005626337 | 2                   | Predicted alternative tryptophan synthase beta-subunit (paralog of TrpB) [Termite Gut (version 3)]   | Supernatant                                         | 247 |              | COG1350 | R   | pfam00291                                                     | TIGR01415              | No  | No  |
| 2005565848 | 2                   | Predicted cobalamin binding protein [Termite Gut (version 3)]                                        | Pellet                                              | 210 | EC:2.1.1.13  | COG5012 | R   | pfam02310<br>pfam02607                                        | TIGR02370              | No  | No  |
| 2005594882 | 3                   | Predicted glycosylase [Termite Gut (version 3)]                                                      | Soluble                                             | 330 |              | COG2152 | G   | pfam04041                                                     |                        | No  | No  |
| 2005564840 | 4                   | Predicted HD superfamily hydrolase [Termite Gut (version 3)]                                         | Pellet                                              | 509 |              | COG1418 | R   | pfam00013<br>pfam01966                                        | TIGR00277<br>TIGR03319 | Yes | Yes |
| 2005590323 | 3                   | Predicted HD superfamily hydrolase [Termite Gut (version 3)]                                         | Pellet                                              | 509 |              | COG1418 | R   | pfam00013<br>pfam01966                                        | TIGR00277<br>TIGR03319 | Yes | Yes |
| 2005581798 | 3 / 3               | Predicted inhibitor of MCP methylation, homolog of fCheC [Termite Gut (version 3)]                   | Soluble / Supernatant                               | 128 |              | COG1406 | N   | pfam04509                                                     |                        | Yes | No  |
| 2005581954 | 2                   | Predicted inhibitor of MCP methylation, homolog of fCheC [Termite Gut (version 3)]                   | Soluble                                             | 158 |              | COG1406 | N   | pfam04509                                                     |                        | No  | No  |
| 2005599434 | 2                   | Predicted inhibitor of MCP methylation, homolog of fCheC [Termite Gut (version 3)]                   | supernatant                                         | 72  |              | COG1406 | N   |                                                               |                        | No  | No  |
| 2005590146 | 4 / 3               | Predicted solute binding protein [Termite Gut (version 3)]                                           | Pellet / Supernatant                                | 480 |              | COG3889 | R   | pfam00496                                                     |                        | No  | No  |
| 2005599727 | 3                   | Predicted transcriptional regulators [Termite Gut (version 3)]                                       | Pellet                                              | 194 |              |         |     | pfam01381<br>pfam07883                                        |                        | No  | No  |
| 2005580154 | 2                   | Predicted transcriptional regulators [Termite Gut (version 3)]                                       | Soluble                                             | 156 |              |         |     | pfam07883                                                     |                        | No  | No  |
| 2005579233 | 2                   | Preprotein translocase subunit SecA (ATPase, RNA helicase) [Termite Gut (version 3)]                 | Pellet                                              | 698 |              | COG0653 | U   | pfam00271<br>pfam07516<br>pfam07517                           | TIGR00963              | No  | No  |
| 2005562736 | 3                   | Preprotein translocase subunit SecD [Termite Gut (version 3)]                                        | Pellet                                              | 302 |              | COG0342 | U   |                                                               | TIGR01129              | No  | Yes |
| 2005572132 | 2                   | Preprotein translocase subunit SecD [Termite Gut (version 3)]                                        | Pellet                                              | 562 |              | COG0342 | U   | pfam02355<br>pfam07549                                        | TIGR01129<br>TIGR00916 | Yes | Yes |
| 2005577150 | 2                   | Protease subunit of ATP-dependent Clp proteases [Termite Gut (version 3)]                            | Soluble                                             | 181 | EC:3.4.21.92 | COG0740 | U O | pfam00574                                                     | TIGR00493              | No  | No  |
| 2005566601 | 2 / 2               | Protease subunit of ATP-dependent Clp proteases [Termite Gut (version 3)]                            | Pellet / Supernatant                                | 105 |              | COG0740 | O U | pfam00574                                                     |                        | Yes | No  |
| 2005627300 | 2                   | Putative chemotaxis protein CheX [Termite Gut (version 3)]                                           | supernatant                                         | 146 |              | COG1406 | N   |                                                               |                        | No  | No  |
| 2005586144 | 7 / 4 / 4 / 9 / 10  | Putative sugar binding secreted protein [Termite Gut (version 3)]                                    | Global / Insoluble / Soluble / Pellet / Supernatant | 336 |              | COG1653 | G   | pfam01547                                                     |                        | No  | No  |
| 2005592465 | 9 / 4 / 5 / 15 / 13 | Putative sugar binding secreted protein [Termite Gut (version 3)]                                    | Global / Insoluble / Soluble / Pellet / Supernatant | 320 |              | COG1653 | G   |                                                               |                        | No  | No  |
| 2005567941 | 6 / 2 / 6 / 7       | Putative sugar binding secreted protein [Termite Gut (version 3)]                                    | Global / Insoluble / Pellet / Supernatant           | 260 |              |         |     |                                                               |                        | Yes | No  |
| 2005592967 | 2                   | Pyridoxal phosphate biosynthesis protein [Termite Gut (version 3)]                                   | Pellet                                              | 242 |              | COG0854 | H   | pfam03740                                                     | TIGR00559              | No  | No  |

|            |                       |                                                                                                                               |                                                     |      |              |         |     |                                                               |                        |     |    |
|------------|-----------------------|-------------------------------------------------------------------------------------------------------------------------------|-----------------------------------------------------|------|--------------|---------|-----|---------------------------------------------------------------|------------------------|-----|----|
| 2005583573 | 5 / 6 / 7 / 7         | Pyruvate ferredoxin/flavodoxin oxidoreductase [Termite Gut (version 3)]                                                       | Global / Soluble / Pellet / Supernatant             | 1081 | EC:1.2.7.-   | COG0674 | C   | pfam00037<br>pfam01558<br>pfam01855<br>pfam02775<br>pfam10371 | TIGR02176              | Yes | No |
| 2005560509 | 7 / 2 / 10 / 8 / 11   | Pyruvate ferredoxin/flavodoxin oxidoreductase [Termite Gut (version 3)]                                                       | Global / Insoluble / Soluble / Pellet / Supernatant | 1030 | EC:1.2.7.-   | COG1013 | C   | pfam00037<br>pfam01558<br>pfam01855<br>pfam02775<br>pfam10371 | TIGR02176              | No  | No |
| 2005567823 | 5 / 6 / 6             | Pyruvate ferredoxin/flavodoxin oxidoreductase ferredoxin/flavodoxin oxidoreductase [Termite Gut (version 3)]                  | Soluble / Pellet / Supernatant                      | 1043 | EC:1.2.7.-   | COG1013 | C   | pfam00037<br>pfam01558<br>pfam01855<br>pfam02775<br>pfam10371 | TIGR02176              | No  | No |
| 2005579936 | 2 / 2                 | Pyruvate ferredoxin/flavodoxin oxidoreductase ferredoxin/flavodoxin oxidoreductase [Termite Gut (version 3)]                  | Soluble / Pellet                                    | 915  | EC:1.2.7.-   | COG1013 | C   | pfam00037<br>pfam01558<br>pfam02775<br>pfam10371              | TIGR02176              | No  | No |
| 2005560295 | 15 / 5 / 22 / 14 / 19 | Pyruvate ferredoxin/flavodoxin oxidoreductase [Termite Gut (version 3)]                                                       | Global / Insoluble / Soluble / Pellet / Supernatant | 837  |              | COG0674 | C   | pfam00037<br>pfam01558<br>pfam01855<br>pfam10371              | TIGR02176              | No  | No |
| 2005561030 | 2 / 3 / 3             | Pyruvate ferredoxin/flavodoxin oxidoreductase [Termite Gut (version 3)]                                                       | Soluble / Pellet / Supernatant                      | 814  |              | COG0674 | C   | pfam00037<br>pfam01558<br>pfam01855<br>pfam10371              | TIGR02176              | No  | No |
| 2005570505 | 3 / 4 / 2 / 4         | Pyruvate ferredoxin/flavodoxin oxidoreductase [Termite Gut (version 3)]                                                       | Global / Soluble / Pellet / Supernatant             | 931  |              | COG0674 | C   | pfam00037<br>pfam01558<br>pfam01855<br>pfam10371              | TIGR02176              | No  | No |
| 2005581296 | 3                     | Pyruvate ferredoxin/flavodoxin oxidoreductase [Termite Gut (version 3)]                                                       | Soluble                                             | 576  |              | COG0674 | C   | pfam00037<br>pfam01558<br>pfam01855<br>pfam10371              | TIGR02176              | No  | No |
| 2005569171 | 2 / 3                 | Pyruvate ferredoxin/flavodoxin oxidoreductase [Termite Gut (version 3)]                                                       | Soluble / Supernatant                               | 610  |              | COG1013 | C   | pfam00037<br>pfam01558<br>pfam02775<br>pfam10371              | TIGR02176              | No  | No |
| 2005571809 | 4 / 3 / 4             | Pyruvate ferredoxin/flavodoxin oxidoreductase [Termite Gut (version 3)]                                                       | Global / Pellet / Supernatant                       | 578  |              | COG1013 | C   | pfam00037<br>pfam01558<br>pfam02775<br>pfam10371              | TIGR02176              | No  | No |
| 2005561029 | 9 / 7 / 9 / 10        | Pyruvate ferredoxin/flavodoxin oxidoreductase [Termite Gut (version 3)]                                                       | Global / Soluble / Pellet / Supernatant             | 551  |              | COG1013 | C   | pfam00037<br>pfam02775<br>pfam10371                           | TIGR02176              | No  | No |
| 2005573088 | 2                     | Pyruvate ferredoxin/flavodoxin oxidoreductase [Termite Gut (version 3)]                                                       | Soluble                                             | 586  |              | COG1013 | C   | pfam00037<br>pfam02775<br>pfam10371                           | TIGR02176              | No  | No |
| 2005562807 | 2 / 4 / 5 / 3         | Pyruvate ferredoxin/flavodoxin oxidoreductase [Termite Gut (version 3)]                                                       | Global / Soluble / Pellet / Supernatant             | 476  |              | COG1013 | C   | pfam02775                                                     | TIGR02176              | No  | No |
| 2005568307 | 5 / 2                 | Pyruvate ferredoxin/flavodoxin oxidoreductase [Termite Gut (version 3)]                                                       | Soluble / Supernatant                               | 474  |              | COG1013 | C   | pfam02775                                                     | TIGR02176              | No  | No |
| 2005560510 | 2                     | Pyruvate ferredoxin/flavodoxin oxidoreductase [Termite Gut (version 3)]                                                       | supernatant                                         | 683  |              | COG1013 | C   | pfam00037<br>pfam01558<br>pfam02775<br>pfam10371              | TIGR02176<br>TIGR01435 | Yes | No |
| 2005589291 | 4 / 3 / 11 / 4        | Pyruvate ferredoxin/flavodoxin oxidoreductase [Termite Gut (version 3)]                                                       | Global / Insoluble / Pellet / Supernatant           | 422  |              | COG1014 | C   | pfam00037<br>pfam01558<br>pfam10371                           |                        | No  | No |
| 2005589290 | 2 / 2 / 8 / 3         | Pyruvate ferredoxin/flavodoxin oxidoreductase [Termite Gut (version 3)]                                                       | Global / Insoluble / Pellet / Supernatant           | 402  |              | COG1013 | C   | pfam00037<br>pfam02775                                        |                        | No  | No |
| 2005614434 | 2                     | Pyruvate ferredoxin/flavodoxin oxidoreductase [Termite Gut (version 3)]                                                       | Pellet                                              | 267  |              | COG1013 | C   | pfam00037<br>pfam10371                                        |                        | No  | No |
| 2005587076 | 2 / 2                 | Pyruvate ferredoxin/flavodoxin oxidoreductase [Termite Gut (version 3)]                                                       | Soluble / Supernatant                               | 291  |              | COG0674 | C   | pfam01558<br>pfam01855                                        |                        | No  | No |
| 2005571808 | 3                     | Pyruvate ferredoxin/flavodoxin oxidoreductase [Termite Gut (version 3)]                                                       | Pellet                                              | 296  |              | COG0674 | C   | pfam01855                                                     |                        | Yes | No |
| 2005592666 | 2 / 5 / 4             | Pyruvate ferredoxin/flavodoxin oxidoreductase [Termite Gut (version 3)]                                                       | Insoluble / Pellet / Supernatant                    | 246  |              | COG0674 | C   | pfam01855                                                     |                        | No  | No |
| 2005617012 | 2                     | Pyruvate ferredoxin/flavodoxin oxidoreductase [Termite Gut (version 3)]                                                       | Pellet                                              | 278  |              | COG0674 | C   | pfam01855                                                     |                        | No  | No |
| 2005569174 | 2 / 2                 | Pyruvate ferredoxin/flavodoxin oxidoreductase [Termite Gut (version 3)]                                                       | Pellet / Supernatant                                | 328  |              | COG1013 | C   | pfam02775                                                     |                        | No  | No |
| 2005601979 | 2                     | Pyruvate ferredoxin/flavodoxin oxidoreductase [Termite Gut (version 3)]                                                       | Pellet                                              | 209  |              | COG1013 | C   |                                                               |                        | No  | No |
| 2005568587 | 2 / 4 / 2 / 3         | Pyruvate kinase [Termite Gut (version 3)]                                                                                     | Global / Soluble / Pellet / Supernatant             | 605  | EC:2.7.1.40  | COG0469 | G   | pfam00224<br>pfam02887                                        | TIGR01064              | No  | No |
| 2005574037 | 2 / 2                 | Pyruvate kinase [Termite Gut (version 3)]                                                                                     | Soluble / Supernatant                               | 605  | EC:2.7.1.40  | COG0469 | G   | pfam00224<br>pfam02887                                        | TIGR01064              | No  | No |
| 2005576487 | 2                     | Pyruvate kinase [Termite Gut (version 3)]                                                                                     | Soluble                                             | 604  | EC:2.7.1.40  | COG0469 | G   | pfam00224<br>pfam02887                                        | TIGR01064              | No  | No |
| 2005632204 | 5                     | Pyruvate kinase [Termite Gut (version 3)]                                                                                     | Pellet                                              | 275  |              | COG0469 | G   | pfam00224                                                     | TIGR01064              | No  | No |
| 2005597621 | 2 / 3                 | Pyruvate kinase [Termite Gut (version 3)]                                                                                     | Soluble / Pellet                                    | 231  |              | COG0469 | G   | pfam00224                                                     |                        | No  | No |
| 2005625460 | 3                     | Pyruvate kinase [Termite Gut (version 3)]                                                                                     | Soluble                                             | 195  |              | COG0469 | G   | pfam00224                                                     |                        | No  | No |
| 2005580672 | 2                     | Pyruvate kinase [Termite Gut (version 3)]                                                                                     | Supernatant                                         | 355  |              | COG0469 | G   | pfam00224<br>pfam02887                                        |                        | No  | No |
| 2005610428 | 2                     | Pyruvate kinase [Termite Gut (version 3)]                                                                                     | Pellet                                              | 281  |              | COG0469 | G   | pfam00224<br>pfam02887                                        |                        | No  | No |
| 2005560155 | 3 / 4                 | Pyruvate/oxaloacetate carboxyltransferase [Termite Gut (version 3)]                                                           | Pellet / Supernatant                                | 520  | EC:4.1.1.3   | COG5016 | C   | pfam00364<br>pfam00682<br>pfam02436                           | TIGR01108              | No  | No |
| 2005566936 | 2                     | Pyruvate/oxaloacetate carboxyltransferase [Termite Gut (version 3)]                                                           | Pellet                                              | 614  | EC:4.1.1.3   | COG5016 | C   | pfam00364<br>pfam00682<br>pfam02436                           |                        | No  | No |
| 2005580671 | 2 / 2                 | Pyruvate/oxaloacetate carboxyltransferase [Termite Gut (version 3)]                                                           | Pellet / Supernatant                                | 604  | EC:4.1.1.3   | COG5016 | C   | pfam00364<br>pfam00682<br>pfam02436                           |                        | No  | No |
| 2005560896 | 2 / 3                 | Pyruvate/oxaloacetate carboxyltransferase [Termite Gut (version 3)]                                                           | Pellet / Supernatant                                | 378  |              | COG5016 | C   | pfam00364<br>pfam00682<br>pfam02436                           |                        | No  | No |
| 2005562101 | 6                     | Pyruvate/oxaloacetate carboxyltransferase [Termite Gut (version 3)]                                                           | Pellet                                              | 403  |              | COG5016 | C   | pfam00682                                                     |                        | No  | No |
| 2005581632 | 2                     | Pyruvate/oxaloacetate carboxyltransferase [Termite Gut (version 3)]                                                           | Pellet                                              | 404  |              | COG5016 | C   | pfam00682                                                     |                        | No  | No |
| 2005561277 | 4 / 2                 | Pyruvate/oxaloacetate carboxyltransferase [Termite Gut (version 3)]                                                           | Pellet / Supernatant                                | 246  |              | COG5016 | C   |                                                               |                        | No  | No |
| 2005579148 | 2                     | RecA/RadA recombinase [Termite Gut (version 3)]                                                                               | Pellet                                              | 368  | EC:3.4.21.88 | COG0468 | L   | pfam00154                                                     | TIGR02012              | No  | No |
| 2005567233 | 2 / 2                 | Response regulator containing a CheY-like receive r domain and an HD-GYP domain [Termite Gut (version 3)]                     | Soluble / Supernatant                               | 362  |              | COG3437 | K T | pfam00072<br>pfam01966                                        |                        | No  | No |
| 2005568500 | 2                     | Response regulators consisting of a CheY-like rec iver domain and a winged-helix DNA-binding domain [Termite Gut (version 3)] | Pellet                                              | 231  | EC:3.1.1.61  | COG0745 | T K | pfam00072<br>pfam00486                                        |                        | No  | No |
| 2005560787 | 2                     | Ribose 5-phosphate isomerase [Termite Gut (version 3)]                                                                        | Soluble                                             | 192  | EC:5.3.1.6   | COG0120 | G   | pfam06026                                                     | TIGR00021              | No  | No |
| 2005563230 | 2 / 3                 | Ribosomal protein L1 [Termite Gut (version 3)]                                                                                | Insoluble / Pellet                                  | 205  |              | COG0081 | J   | pfam00687                                                     | TIGR01169              | No  | No |
| 2005566549 | 2                     | Ribosomal protein L1 [Termite Gut (version 3)]                                                                                | Soluble                                             | 226  |              | COG0081 | J   | pfam00687                                                     | TIGR01169              | No  | No |
| 2005591601 | 2                     | Ribosomal protein L1 [Termite Gut (version 3)]                                                                                | Pellet                                              | 229  |              | COG0081 | J   | pfam00687                                                     | TIGR01169              | No  | No |
| 2005569711 | 2                     | Ribosomal protein L10 [Termite Gut (version 3)]                                                                               | Pellet                                              | 181  |              | COG0244 | J   | pfam00466                                                     |                        | No  | No |
| 2005591636 | 2                     | Ribosomal protein L10 [Termite Gut (version 3)]                                                                               | Pellet                                              | 176  |              | COG0244 | J   | pfam00466                                                     |                        | No  | No |

|            |                   |                                                                                            |                                                     |     |             |         |   |                                     |           |     |     |
|------------|-------------------|--------------------------------------------------------------------------------------------|-----------------------------------------------------|-----|-------------|---------|---|-------------------------------------|-----------|-----|-----|
| 2005580522 | 2                 | Ribosomal protein L11 [Termite Gut (version 3)]                                            | Pellet                                              | 140 |             | COG0080 | J | pfam00298<br>pfam03946              | TIGR01632 | No  | No  |
| 2005572445 | 2                 | Ribosomal protein L13 [Termite Gut (version 3)]                                            | Pellet                                              | 88  |             | COG0102 | J | pfam00572                           | TIGR01066 | No  | No  |
| 2005570327 | 2                 | Ribosomal protein L14 [Termite Gut (version 3)]                                            | Pellet                                              | 113 |             | COG0093 | J | pfam00238                           | TIGR01067 | No  | No  |
| 2005562943 | 2                 | Ribosomal protein L15 [Termite Gut (version 3)]                                            | Pellet                                              | 166 |             | COG0200 | J | pfam00256<br>pfam01305              | TIGR01071 | No  | No  |
| 2005565451 | 2                 | Ribosomal protein L15 [Termite Gut (version 3)]                                            | Pellet                                              | 169 |             | COG0200 | J | pfam00256<br>pfam01305              | TIGR01071 | No  | No  |
| 2005570331 | 2                 | Ribosomal protein L16/L10E [Termite Gut (version 3)]                                       | Pellet                                              | 137 |             | COG0197 | J | pfam00252                           | TIGR01164 | No  | No  |
| 2005562940 | 4                 | Ribosomal protein L18 [Termite Gut (version 3)]                                            | Pellet                                              | 120 |             | COG0256 | J | pfam00861                           | TIGR00060 | No  | No  |
| 2005572282 | 2                 | Ribosomal protein L18 [Termite Gut (version 3)]                                            | Pellet                                              | 120 |             | COG0256 | J | pfam00861                           | TIGR00060 | No  | No  |
| 2005582569 | 2                 | Ribosomal protein L19 [Termite Gut (version 3)]                                            | Pellet                                              | 141 |             | COG0335 | J | pfam01245                           | TIGR01024 | No  | No  |
| 2005570335 | 2                 | Ribosomal protein L2 [Termite Gut (version 3)]                                             | Pellet                                              | 278 |             | COG0090 | J | pfam00181<br>pfam03947              | TIGR01171 | No  | No  |
| 2005586208 | 2                 | Ribosomal protein L20 [Termite Gut (version 3)]                                            | Pellet                                              | 101 |             | COG0292 | J | pfam00453                           | TIGR01032 | No  | No  |
| 2005560128 | 2                 | Ribosomal protein L22 [Termite Gut (version 3)]                                            | Pellet                                              | 113 |             | COG0091 | J | pfam00237                           | TIGR01044 | Yes | No  |
| 2005570333 | 2                 | Ribosomal protein L22 [Termite Gut (version 3)]                                            | Pellet                                              | 140 |             | COG0091 | J | pfam00237                           | TIGR01044 | No  | No  |
| 2005581783 | 2                 | Ribosomal protein L23 [Termite Gut (version 3)]; Duplicate proteins: 2005588695,2005588699 | Pellet                                              | 95  |             | COG0089 | J | pfam00276                           |           | No  | No  |
| 2005590093 | 2                 | Ribosomal protein L25 (general stress protein Ctc ) [Termite Gut (version 3)]              | Pellet                                              | 206 |             | COG1825 | J |                                     | TIGR00731 | No  | No  |
| 2005611822 | 6                 | Ribosomal protein L25 (general stress protein Ctc ) [Termite Gut (version 3)]              | Pellet                                              | 186 |             |         |   |                                     | TIGR00731 | No  | No  |
| 2005571523 | 2                 | Ribosomal protein L27 [Termite Gut (version 3)]                                            | Pellet                                              | 91  |             | COG0211 | J | pfam01016                           | TIGR00062 | No  | No  |
| 2005573864 | 2                 | Ribosomal protein L3 [Termite Gut (version 3)]                                             | Supernatant                                         | 210 |             | COG0087 | J | pfam00297                           |           | No  | No  |
| 2005606679 | 2                 | Ribosomal protein L3 [Termite Gut (version 3)]                                             | Pellet                                              | 163 |             | COG0087 | J | pfam00297                           |           | No  | No  |
| 2005567188 | 2                 | Ribosomal protein L4 [Termite Gut (version 3)]                                             | Pellet                                              | 213 |             | COG0088 | J | pfam00573                           |           | No  | No  |
| 2005578011 | 4                 | Ribosomal protein L5 [Termite Gut (version 3)]                                             | Pellet                                              | 118 |             | COG0094 | J | pfam00281<br>pfam00673              |           | No  | No  |
| 2005585551 | 3                 | Ribosomal protein L5 [Termite Gut (version 3)]                                             | Pellet                                              | 194 |             | COG0094 | J | pfam00281<br>pfam00673              |           | No  | No  |
| 2005588291 | 2                 | Ribosomal protein L5 [Termite Gut (version 3)]                                             | Pellet                                              | 168 |             | COG0094 | J | pfam00281<br>pfam00673              |           | No  | No  |
| 2005566553 | 4 / 2 / 2         | Ribosomal protein L7/L12 [Termite Gut (version 3)]                                         | Soluble / Pellet / Supernatant                      | 128 |             | COG0222 | J | pfam00542                           | TIGR00855 | No  | No  |
| 2005569712 | 3 / 2             | Ribosomal protein L7/L12 [Termite Gut (version 3)]                                         | Soluble / Supernatant                               | 128 |             | COG0222 | J | pfam00542                           | TIGR00855 | No  | No  |
| 2005573265 | 2 / 2             | Ribosomal protein L7/L12 [Termite Gut (version 3)]                                         | Global / Pellet                                     | 128 |             | COG0222 | J | pfam00542                           | TIGR00855 | Yes | No  |
| 2005580526 | 3 / 4 / 2         | Ribosomal protein L7/L12 [Termite Gut (version 3)]                                         | Soluble / Pellet / Supernatant                      | 129 |             | COG0222 | J | pfam00542                           | TIGR00855 | Yes | No  |
| 2005586265 | 2                 | Ribosomal protein L7/L12 [Termite Gut (version 3)]                                         | Soluble                                             | 114 |             | COG0222 | J | pfam00542                           | TIGR00855 | Yes | No  |
| 2005591635 | 3                 | Ribosomal protein L7/L12 [Termite Gut (version 3)]                                         | Soluble                                             | 128 |             | COG0222 | J | pfam00542                           | TIGR00855 | No  | No  |
| 2005568597 | 2                 | Ribosomal protein L9 [Termite Gut (version 3)]                                             | Pellet                                              | 201 |             | COG0359 | J | pfam01281<br>pfam03948              | TIGR00158 | No  | No  |
| 2005607425 | 2                 | Ribosomal protein S1 [Termite Gut (version 3)]                                             | Global                                              | 285 |             | COG0539 | J | pfam00575                           | TIGR00717 | No  | No  |
| 2005578094 | 2                 | Ribosomal protein S1 [Termite Gut (version 3)]                                             | Pellet                                              | 168 |             | COG0539 | J | pfam00575                           |           | No  | No  |
| 2005561120 | 2 / 2             | Ribosomal protein S10 [Termite Gut (version 3)]                                            | Global / Pellet                                     | 84  |             | COG0051 | J | pfam00338                           | TIGR01049 | No  | No  |
| 2005567186 | 2                 | Ribosomal protein S10 [Termite Gut (version 3)]                                            | Global                                              | 96  |             | COG0051 | J | pfam00338                           | TIGR01049 | No  | No  |
| 2005578458 | 4                 | Ribosomal protein S11 [Termite Gut (version 3)]; Duplicate proteins: 2005578966            | Pellet                                              | 145 |             | COG0100 | J | pfam00411                           |           | No  | No  |
| 2005576251 | 3 / 2             | Ribosomal protein S15P/S13E [Termite Gut (version 3)]; Duplicate proteins: 2005593039      | Pellet / Supernatant                                | 89  |             | COG0184 | J | pfam00312                           | TIGR00952 | No  | No  |
| 2005560127 | 2 / 2             | Ribosomal protein S19 [Termite Gut (version 3)]                                            | Pellet / Supernatant                                | 94  |             | COG0185 | J | pfam00203                           | TIGR01050 | No  | No  |
| 2005567403 | 2                 | Ribosomal protein S2 [Termite Gut (version 3)]                                             | Pellet                                              | 291 |             | COG0052 | J | pfam00318                           | TIGR01011 | No  | No  |
| 2005572173 | 2                 | Ribosomal protein S2 [Termite Gut (version 3)]                                             | Supernatant                                         | 305 |             | COG0052 | J | pfam00318                           | TIGR01011 | No  | No  |
| 2005598229 | 2                 | Ribosomal protein S2 [Termite Gut (version 3)]                                             | Pellet                                              | 157 |             | COG0052 | J | pfam00318                           | TIGR01011 | No  | No  |
| 2005565738 | 2 / 2 / 2         | Ribosomal protein S2 [Termite Gut (version 3)]                                             | Global / Pellet / Supernatant                       | 148 |             | COG0052 | J | pfam00318                           |           | No  | No  |
| 2005620820 | 2                 | Ribosomal protein S21 [Termite Gut (version 3)]                                            | Pellet                                              | 67  |             |         |   | pfam01165                           | TIGR00030 | No  | No  |
| 2005560129 | 4                 | Ribosomal protein S3 [Termite Gut (version 3)]                                             | Pellet                                              | 223 |             | COG0092 | J | pfam00189<br>pfam00417<br>pfam07650 | TIGR01009 | Yes | No  |
| 2005560845 | 3                 | Ribosomal protein S3 [Termite Gut (version 3)]                                             | Pellet                                              | 244 |             | COG0092 | J | pfam00189<br>pfam00417<br>pfam07650 | TIGR01009 | No  | No  |
| 2005570332 | 4 / 3             | Ribosomal protein S3 [Termite Gut (version 3)]                                             | Pellet / Supernatant                                | 222 |             | COG0092 | J | pfam00189<br>pfam00417<br>pfam07650 | TIGR01009 | No  | No  |
| 2005578001 | 3                 | Ribosomal protein S3 [Termite Gut (version 3)]                                             | Pellet                                              | 236 |             | COG0092 | J | pfam00189<br>pfam00417<br>pfam07650 | TIGR01009 | No  | No  |
| 2005560677 | 3 / 2 / 3         | Ribosomal protein S4 and related proteins [Termite Gut (version 3)]                        | Global / Pellet / Supernatant                       | 192 |             | COG0522 | J | pfam00163<br>pfam01479              | TIGR01017 | No  | No  |
| 2005562942 | 3 / 2 / 4 / 2     | Ribosomal protein S5 [Termite Gut (version 3)]                                             | Global / Insoluble / Pellet / Supernatant           | 134 |             | COG0098 | J | pfam00333<br>pfam03719              | TIGR01021 | No  | No  |
| 2005565454 | 3 / 3 / 2         | Ribosomal protein S5 [Termite Gut (version 3)]                                             | Global / Pellet / Supernatant                       | 217 |             | COG0098 | J | pfam00333<br>pfam03719              | TIGR01021 | No  | No  |
| 2005566247 | 4                 | Ribosomal protein S7 [Termite Gut (version 3)]                                             | Pellet                                              | 156 |             | COG0049 | J | pfam00177                           | TIGR01029 | No  | No  |
| 2005598452 | 2                 | Ribosomal protein S8 [Termite Gut (version 3)]                                             | Pellet                                              | 119 |             | COG0096 | J | pfam00410                           |           | No  | No  |
| 2005595577 | 6 / 3 / 6 / 5 / 5 | RNA-binding proteins (RRM domain) [Termite Gut (version 3)]                                | Global / Insoluble / Soluble / Pellet / Supernatant | 93  |             | COG0724 | R | pfam00076                           |           | No  | No  |
| 2005620725 | 2 / 4             | RNA-binding proteins (RRM domain) [Termite Gut (version 3)]                                | Soluble / Pellet                                    | 82  |             | COG0724 | R | pfam00076                           |           | No  | No  |
| 2005578400 | 4 / 2 / 4 / 3 / 5 | Rubrythrin [Termite Gut (version 3)]                                                       | Global / Insoluble / Soluble / Pellet / Supernatant | 180 |             | COG1592 | C | pfam00301<br>pfam02915              |           | No  | No  |
| 2005564589 | 4 / 3             | Rubrythrin [Termite Gut (version 3)]                                                       | Soluble / Supernatant                               | 174 |             | COG1592 | C | pfam02915                           |           | No  | No  |
| 2005571543 | 2                 | Rubrythrin [Termite Gut (version 3)]                                                       | Soluble                                             | 191 |             | COG1592 | C | pfam02915                           |           | No  | No  |
| 2005584209 | 2 / 3 / 3         | Rubrythrin [Termite Gut (version 3)]                                                       | Soluble / Pellet / Supernatant                      | 102 |             | COG1592 | C | pfam02915                           |           | No  | No  |
| 2005599875 | 2                 | Rubrythrin [Termite Gut (version 3)]                                                       | Soluble                                             | 180 |             | COG1592 | C | pfam02915                           |           | No  | No  |
| 2005611516 | 2                 | Rubrythrin [Termite Gut (version 3)]                                                       | Soluble                                             | 90  |             | COG1592 | C | pfam02915                           |           | No  | No  |
| 2005584742 | 3 / 3             | S-adenosylhomocysteine hydrolase [Termite Gut (version 3)]                                 | Soluble / Supernatant                               | 382 | EC:3.3.1.1  | COG0499 | H | pfam02826<br>pfam05221              | TIGR00936 | No  | No  |
| 2005592642 | 3 / 3             | S-adenosylhomocysteine hydrolase [Termite Gut (version 3)]                                 | Pellet / Supernatant                                | 290 |             | COG0499 | H | pfam00670<br>pfam05221              | TIGR00936 | No  | No  |
| 2005628997 | 2                 | S-adenosylhomocysteine hydrolase [Termite Gut (version 3)]                                 | Pellet                                              | 237 |             | COG0499 | H | pfam00670<br>pfam05221              | TIGR00936 | No  | No  |
| 2005565301 | 2                 | S-adenosylhomocysteine hydrolase [Termite Gut (version 3)]                                 | Supernatant                                         | 164 |             | COG0499 | H | pfam05221                           | TIGR00936 | No  | No  |
| 2005586497 | 2                 | S-adenosylmethionine synthetase [Termite Gut (version 3)]                                  | Pellet                                              | 267 | EC:2.5.1.6  | COG0192 | H | pfam00438<br>pfam02772<br>pfam02773 | TIGR01034 | No  | No  |
| 2005560006 | 3 / 2 / 7 / 3     | S-adenosylmethionine synthetase [Termite Gut (version 3)]                                  | Global / Soluble / Pellet / Supernatant             | 262 |             | COG0192 | H | pfam02772<br>pfam02773              | TIGR01034 | No  | No  |
| 2005566710 | 4 / 2             | Selenocysteine lyase [Termite Gut (version 3)]                                             | Pellet / Supernatant                                | 468 | EC:4.4.1.16 | COG0520 | E | pfam00266                           | TIGR01979 | No  | No  |
| 2005574123 | 2                 | Signal transduction histidine kinase [Termite Gut (version 3)]                             | Pellet                                              | 535 |             | COG0642 | T | pfam00072<br>pfam00512<br>pfam02518 |           | No  | No  |
| 2005593940 | 2                 | Signal transduction histidine kinase [Termite Gut (version 3)]                             | Pellet                                              | 681 |             | COG0642 | T | pfam00072<br>pfam00512<br>pfam02518 |           | No  | Yes |
| 2005617005 | 2                 | Spermidine/putrescine-binding periplasmic protein [Termite Gut (version 3)]                | Pellet                                              | 198 |             | COG0687 | E |                                     |           | Yes | No  |
| 2005567955 | 2                 | Succinate dehydrogenase/fumarate reductase, Fe-S protein subunit [Termite Gut (version 3)] | Pellet                                              | 261 | EC:1.3.99.1 | COG0479 | C | pfam00037                           | TIGR00384 | No  | No  |

|            |               |                                                                                                                |                                            |     |             |         |   |                                                  |                        |     |    |
|------------|---------------|----------------------------------------------------------------------------------------------------------------|--------------------------------------------|-----|-------------|---------|---|--------------------------------------------------|------------------------|-----|----|
| 2005572723 | 6 / 9 / 5     | Succinate dehydrogenase/fumarate reductase, flavo protein subunit [Termite Gut (version 3)]                    | Global / Pellet / Supernatant              | 596 | EC:1.3.99.1 | COG1053 | C | pfam00890<br>pfam02910                           | TIGR01811              | No  | No |
| 2005567954 | 3             | Succinate dehydrogenase/fumarate reductase, flavo protein subunit [Termite Gut (version 3)]                    | Pellet                                     | 225 |             | COG1053 | C | pfam02910                                        |                        | No  | No |
| 2005561658 | 2             | Sugar (pentulose and hexulose) kinases [Termite Gut (version 3)]                                               | Pellet                                     | 504 | EC:2.7.1.17 | COG1070 | G | pfam00370<br>pfam02782                           | TIGR01312              | No  | No |
| 2005581846 | 2             | Sugar (pentulose and hexulose) kinases [Termite Gut (version 3)]                                               | Soluble                                    | 460 | EC:2.7.1.12 | COG1070 | G | pfam00370<br>pfam02782                           |                        | No  | No |
| 2005621236 | 2 / 2         | Sugar ABC transporter sugar-binding protein [Termite Gut (version 3)]                                          | Pellet / Supernatant                       | 249 |             | COG1653 | G | pfam01547                                        |                        | No  | No |
| 2005561458 | 2             | Sugar kinases, ribokinase family [Termite Gut (version 3)]                                                     | Soluble                                    | 370 | EC:2.7.1.45 | COG0524 | G | pfam00294                                        |                        | Yes | No |
| 2005566122 | 3             | Sugar kinases, ribokinase family [Termite Gut (version 3)]                                                     | Soluble                                    | 374 | EC:2.7.1.45 | COG0524 | G | pfam00294                                        |                        | Yes | No |
| 2005576977 | 4             | Tartrate dehydratase beta subunit/Fumarate hydratase class I, C-terminal domain [Termite Gut (version 3)]      | Pellet                                     | 311 |             | COG1838 | C | pfam05681<br>pfam05683                           | TIGR00723              | No  | No |
| 2005560068 | 2             | Threonyl-tRNA synthetase [Termite Gut (version 3)]                                                             | Pellet                                     | 524 | EC:6.1.1.3  | COG0441 | J | pfam00587<br>pfam03129<br>pfam07973              | TIGR00418              | No  | No |
| 2005576897 | 2             | Threonyl-tRNA synthetase [Termite Gut (version 3)]                                                             | Pellet                                     | 523 | EC:6.1.1.3  | COG0441 | J | pfam00587<br>pfam03129<br>pfam07973              | TIGR00418              | No  | No |
| 2005591643 | 2             | Transcription antiterminator [Termite Gut (version 3)]                                                         | Pellet                                     | 187 |             | COG0250 | K | pfam00467<br>pfam02357                           | TIGR00922              | No  | No |
| 2005573745 | 6             | Transcription antiterminator [Termite Gut (version 3)]                                                         | Pellet                                     | 187 |             | COG0250 | K | pfam02357                                        | TIGR00922              | No  | No |
| 2005592910 | 2             | Transcription elongation factor [Termite Gut (version 3)]                                                      | Pellet                                     | 325 |             | COG0782 | K | pfam01272<br>pfam03449                           | TIGR01462              | No  | No |
| 2005564344 | 2             | Transcription elongation factor [Termite Gut (version 3)]                                                      | Pellet                                     | 479 |             | COG0195 | K | pfam08529                                        | TIGR01953              | No  | No |
| 2005627729 | 2             | Transcription elongation factor [Termite Gut (version 3)]                                                      | Soluble                                    | 94  |             | COG0782 | K | pfam01272                                        |                        | No  | No |
| 2005603214 | 2             | Transcription elongation factor [Termite Gut (version 3)]                                                      | Pellet                                     | 114 |             |         |   | pfam08529                                        |                        | No  | No |
| 2005609881 | 3 / 4         | Transcription termination factor [Termite Gut (version 3)]                                                     | Pellet / Supernatant                       | 289 |             | COG1158 | K | pfam00006<br>pfam07497                           | TIGR00767              | No  | No |
| 2005585484 | 2 / 2         | Transcription termination factor [Termite Gut (version 3)]                                                     | Pellet / Supernatant                       | 155 |             | COG1158 | K | pfam00006                                        |                        | No  | No |
| 2005563695 | 3             | Transcriptional accessory protein [Termite Gut (version 3)]                                                    | Pellet                                     | 431 |             | COG2183 | K | pfam09371                                        |                        | No  | No |
| 2005570838 | 2             | Transketolase [Termite Gut (version 3)]                                                                        | Soluble                                    | 610 | EC:2.2.1.1  | COG0021 | G | pfam00456<br>pfam02779                           | TIGR00232              | No  | No |
| 2005560816 | 2 / 2         | Transketolase [Termite Gut (version 3)]                                                                        | Soluble / Supernatant                      | 641 | EC:2.2.1.1  | COG0021 | G | pfam00456<br>pfam02779<br>pfam02780              | TIGR00232              | No  | No |
| 2005563813 | 3             | Transketolase [Termite Gut (version 3)]                                                                        | Soluble                                    | 339 |             | COG0021 | G | pfam00456<br>pfam02779                           |                        | No  | No |
| 2005568628 | 2             | Transketolase [Termite Gut (version 3)]                                                                        | Soluble                                    | 126 |             | COG0021 | G | pfam02780                                        |                        | No  | No |
| 2005630400 | 2             | Translation elongation factors (GTPases) [Termite Gut (version 3)]                                             | Supernatant                                | 245 |             | COG0480 | J | pfam00009                                        | TIGR00231              | No  | No |
| 2005586159 | 2             | Translation elongation factors (GTPases) [Termite Gut (version 3)]                                             | Pellet                                     | 699 | EC:3.6.5.3  | COG0480 | J | pfam00009<br>pfam00679<br>pfam03144<br>pfam03764 | TIGR00231<br>TIGR00484 | Yes | No |
| 2005560580 | 8 / 2 / 6     | Translation elongation factors (GTPases) [Termite Gut (version 3)]                                             | Soluble / Pellet / Supernatant             | 659 | EC:3.6.5.3  | COG0480 | J | pfam00009<br>pfam00679<br>pfam03144<br>pfam03764 | TIGR00484              | No  | No |
| 2005564108 | 8 / 3 / 2     | Translation elongation factors (GTPases) [Termite Gut (version 3)]                                             | Soluble / Pellet / Supernatant             | 554 | EC:3.6.5.3  | COG0480 | J | pfam00009<br>pfam00679<br>pfam03144<br>pfam03764 | TIGR00484              | No  | No |
| 2005562092 | 2 / 3         | Translation elongation factors (GTPases) [Termite Gut (version 3)]                                             | Insoluble / Pellet                         | 444 |             | COG0480 | J | pfam00009<br>pfam00679<br>pfam03144<br>pfam03764 | TIGR00484              | No  | No |
| 2005571200 | 2             | Translation elongation factors (GTPases) [Termite Gut (version 3)]                                             | Soluble                                    | 286 |             | COG0480 | J | pfam00009                                        |                        | No  | No |
| 2005601556 | 2             | Translation elongation factors (GTPases) [Termite Gut (version 3)]                                             | Insoluble                                  | 261 |             | COG0480 | J | pfam00009                                        |                        | No  | No |
| 2005609194 | 2 / 2         | Translation elongation factors (GTPases) [Termite Gut (version 3)]                                             | Pellet / Supernatant                       | 288 |             | COG0480 | J | pfam00009<br>pfam03144                           |                        | No  | No |
| 2005572183 | 3             | Translation elongation factors (GTPases) [Termite Gut (version 3)]                                             | Pellet                                     | 393 |             | COG0480 | J | pfam00009<br>pfam03144<br>pfam03764              |                        | No  | No |
| 2005566039 | 3             | Translation elongation factors (GTPases) [Termite Gut (version 3)]                                             | Soluble                                    | 147 |             | COG0480 | J | pfam00679<br>pfam03764                           |                        | No  | No |
| 2005568064 | 2             | Translation elongation factors (GTPases) [Termite Gut (version 3)]                                             | Soluble                                    | 158 |             | COG0480 | J | pfam00679<br>pfam03764                           |                        | No  | No |
| 2005601230 | 2             | Translation elongation factors (GTPases) [Termite Gut (version 3)]                                             | Pellet                                     | 280 |             | COG0480 | J | pfam00679<br>pfam03764                           |                        | No  | No |
| 2005625690 | 2             | Translation elongation factors (GTPases) [Termite Gut (version 3)]                                             | Soluble                                    | 273 |             | COG0480 | J | pfam00679<br>pfam03764                           |                        | No  | No |
| 2005611118 | 2             | Translation initiation factor 1 (IF-1) [Termite Gut (version 3)]                                               | Pellet                                     | 74  |             | COG0361 | J | pfam01176                                        | TIGR00008              | No  | No |
| 2005560101 | 2             | Translation initiation factor 2 (IF-2; GTPase) [Termite Gut (version 3)]                                       | Pellet                                     | 691 |             | COG0532 | J | pfam00009<br>pfam03144<br>pfam04760              | TIGR00231<br>TIGR00487 | No  | No |
| 2005592036 | 2             | TRAP-type uncharacterized transport system, periplasmic component [Termite Gut (version 3)]                    | Soluble                                    | 140 |             | COG2358 | R |                                                  |                        | No  | No |
| 2005568700 | 3 / 3 / 4     | Triosephosphate isomerase [Termite Gut (version 3)]                                                            | Soluble / Pellet / Supernatant             | 230 | EC:5.3.1.1  | COG0149 | G | pfam00121                                        | TIGR00419              | No  | No |
| 2005572563 | 3 / 2         | Triosephosphate isomerase [Termite Gut (version 3)]                                                            | Soluble / Supernatant                      | 250 | EC:5.3.1.1  | COG0149 | G | pfam00121                                        | TIGR00419              | No  | No |
| 2005574181 | 4 / 2 / 3     | Triosephosphate isomerase [Termite Gut (version 3)]                                                            | Soluble / Pellet / Supernatant             | 250 | EC:5.3.1.1  | COG0149 | G | pfam00121                                        | TIGR00419              | No  | No |
| 2005632088 | 2             | Triosephosphate isomerase [Termite Gut (version 3)]                                                            | Soluble                                    | 166 |             | COG0149 | G | pfam00121                                        | TIGR00419              | No  | No |
| 2005603326 | 3             | Triosephosphate isomerase [Termite Gut (version 3)]                                                            | Soluble                                    | 64  |             | COG0149 | G | pfam00121                                        |                        | No  | No |
| 2005616848 | 2             | Triosephosphate isomerase [Termite Gut (version 3)]                                                            | Soluble                                    | 131 |             | COG0149 | G | pfam00121                                        |                        | No  | No |
| 2005622041 | 2 / 2         | Triosephosphate isomerase [Termite Gut (version 3)]                                                            | Pellet / Supernatant                       | 108 |             | COG0149 | G | pfam00121                                        |                        | No  | No |
| 2005633132 | 5 / 2 / 4     | Triosephosphate isomerase [Termite Gut (version 3)]                                                            | Soluble / Pellet / Supernatant             | 147 |             | COG0149 | G | pfam00121                                        |                        | No  | No |
| 2005615549 | 2             | Triosephosphate isomerase [Termite Gut (version 3)]                                                            | Pellet                                     | 295 |             | COG0126 | G | pfam00121<br>pfam00162                           |                        | No  | No |
| 2005574304 | 2             | Type IIA topoisomerase (DNA gyrase/topo II, topoisomerase IV), A subunit [Termite Gut (version 3)]             | Pellet                                     | 119 |             | COG0188 | L | pfam03989                                        |                        | No  | No |
| 2005586241 | 2             | UDP-3-O-acetyl-N-acetylglucosamine deacetylase [Termite Gut (version 3)]                                       | Pellet                                     | 444 | EC:3.5.1.-  | COG0774 | M | pfam03331<br>pfam07977                           | TIGR00325<br>TIGR01750 | No  | No |
| 2005561492 | 2 / 2 / 6 / 4 | Uncharacterized ABC-type transport system, periplasmic component/surface lipoprotein [Termite Gut (version 3)] | Insoluble / Soluble / Pellet / Supernatant | 298 |             | COG1744 | R | pfam02608                                        |                        | No  | No |
| 2005563865 | 3 / 4         | Uncharacterized ABC-type transport system, periplasmic component/surface lipoprotein [Termite Gut (version 3)] | Pellet / Supernatant                       | 325 |             | COG1744 | R | pfam02608                                        |                        | No  | No |
| 2005576018 | 5             | Uncharacterized ABC-type transport system, periplasmic component/surface lipoprotein [Termite Gut (version 3)] | Pellet                                     | 350 |             | COG1744 | R | pfam02608                                        |                        | Yes | No |
| 2005586456 | 2             | Uncharacterized ABC-type transport system, periplasmic component/surface lipoprotein [Termite Gut (version 3)] | Pellet                                     | 332 |             | COG1744 | R | pfam02608                                        |                        | No  | No |
| 2005560213 | 2             | Uncharacterized anaerobic dehydrogenase [Termite Gut (version 3)]                                              | Soluble                                    | 348 |             | COG3383 | R | pfam00037<br>pfam00111<br>pfam02906<br>pfam10588 |                        | No  | No |
| 2005584791 | 2             | Uncharacterized conserved protein [Termite Gut (version 3)]                                                    | Pellet                                     | 246 | EC:2.7.7.27 | COG0217 | S | pfam01709                                        | TIGR01033              | No  | No |
| 2005601583 | 2             | Uncharacterized conserved protein [Termite Gut (version 3)]                                                    | Pellet                                     | 70  |             | COG0217 | S | pfam01709                                        |                        | No  | No |
| 2005589391 | 2 / 2         | Uncharacterized conserved protein [Termite Gut (version 3)]                                                    | Soluble / Pellet                           | 178 |             | COG4198 | S | pfam06245                                        |                        | No  | No |
| 2005586727 | 6             | Uncharacterized conserved protein [Termite Gut (version 3)]                                                    | Soluble                                    | 392 |             | COG3287 | S | pfam08495<br>pfam10442                           |                        | No  | No |
| 2005578135 | 2 / 2         | Uncharacterized conserved protein [Termite Gut (version 3)]                                                    | Insoluble / Pellet                         | 121 |             | COG3874 | S | pfam09579                                        |                        | No  | No |

|            |                   |                                                                                                         |                                                     |     |            |         |   |                                                  |           |     |     |
|------------|-------------------|---------------------------------------------------------------------------------------------------------|-----------------------------------------------------|-----|------------|---------|---|--------------------------------------------------|-----------|-----|-----|
| 2005560643 | 2                 | Uncharacterized flavoproteins [Termite Gut (version 3)]                                                 | Soluble                                             | 616 |            | COG0426 | C | pfam00258<br>pfam00301<br>pfam00753<br>pfam01613 |           | No  | No  |
| 2005573735 | 2                 | Uncharacterized flavoproteins [Termite Gut (version 3)]                                                 | Soluble                                             | 521 |            | COG0426 | C | pfam00258<br>pfam00301<br>pfam01613              |           | No  | No  |
| 2005574485 | 4                 | Uncharacterized N-terminal domain of the transcription elongation factor GreA [Termite Gut (version 3)] | Pellet                                              | 756 |            | COG1747 | S |                                                  |           | No  | No  |
| 2005563564 | 2                 | Uncharacterized protein conserved in bacteria [Termite Gut (version 3)]                                 | Pellet                                              | 970 |            | COG4676 | S |                                                  | TIGR01352 | No  | No  |
| 2005565341 | 2                 | Uncharacterized protein conserved in bacteria [Termite Gut (version 3)]                                 | Pellet                                              | 327 |            | COG4864 | S | pfam01145                                        |           | Yes | Yes |
| 2005578857 | 2                 | Uncharacterized protein conserved in bacteria [Termite Gut (version 3)]                                 | Pellet                                              | 325 |            | COG4864 | S | pfam01145                                        |           | Yes | Yes |
| 2005569509 | 5                 | Uncharacterized protein conserved in bacteria [Termite Gut (version 3)]                                 | Pellet                                              | 455 |            | COG1322 | S | pfam02646                                        |           | No  | No  |
| 2005563281 | 2 / 6 / 6         | Uncharacterized protein related to glutamine synthetase [Termite Gut (version 3)]                       | Global / Pellet / Supernatant                       | 647 | EC:6.3.1.2 | COG3968 | R | pfam00120                                        |           | No  | No  |
| 2005567133 | 2 / 3 / 2         | Uncharacterized protein related to glutamine synthetase [Termite Gut (version 3)]                       | Global / Pellet / Supernatant                       | 396 |            | COG3968 | R | pfam00120                                        |           | No  | No  |
| 2005578915 | 2                 | Uncharacterized protein related to glutamine synthetase [Termite Gut (version 3)]                       | Pellet                                              | 473 |            | COG3968 | R | pfam00120                                        |           | No  | No  |
| 2005582982 | 2                 | Uncharacterized protein related to glutamine synthetase [Termite Gut (version 3)]                       | Supernatant                                         | 416 |            | COG3968 | R | pfam00120                                        |           | No  | No  |
| 2005585914 | 2 / 2             | Uncharacterized protein related to glutamine synthetase [Termite Gut (version 3)]                       | Pellet / Supernatant                                | 404 |            | COG3968 | R | pfam00120                                        |           | No  | No  |
| 2005600811 | 2 / 2             | Uncharacterized protein related to glutamine synthetase [Termite Gut (version 3)]                       | Pellet / Supernatant                                | 270 |            | COG3968 | R | pfam00120                                        |           | No  | No  |
| 2005563280 | 2 / 2 / 2 / 3 / 3 | Uncharacterized protein related to glutamine synthetase [Termite Gut (version 3)]                       | Global / Insoluble / Soluble / Pellet / Supernatant | 340 |            | COG3968 | R |                                                  |           | No  | No  |
| 2005604527 | 6 / 2             | Uncharacterized protein related to glutamine synthetase [Termite Gut (version 3)]                       | Pellet / Supernatant                                | 202 |            | COG3968 | R |                                                  |           | No  | No  |
| 2005595382 | 2 / 2             | Uncharacterized protein, involved in the regulation of septum location [Termite Gut (version 3)]        | Soluble / Pellet                                    | 93  |            | COG2088 | M | pfam04026                                        |           | No  | No  |
| 2005569302 | 2                 | Xylose isomerase [Termite Gut (version 3)]                                                              | Soluble                                             | 449 | EC:5.3.1.5 | COG2115 | G | pfam01261                                        | TIGR02630 | No  | No  |
| 2005563059 | 4 / 4 / 4 / 5     | Xylose isomerase [Termite Gut (version 3)]                                                              | Global / Soluble / Pellet / Supernatant             | 376 | EC:5.3.1.5 | COG2115 | G | pfam01261                                        | TIGR02630 | No  | No  |
| 2005563071 | 2 / 4 / 2         | Xylose isomerase [Termite Gut (version 3)]                                                              | Global / Soluble / Supernatant                      | 320 | EC:5.3.1.5 | COG2115 | G | pfam01261                                        | TIGR02630 | No  | No  |
| 2005564734 | 2                 | Xylose isomerase [Termite Gut (version 3)]                                                              | Pellet                                              | 449 | EC:5.3.1.5 | COG2115 | G | pfam01261                                        | TIGR02630 | No  | No  |
| 2005568482 | 2 / 4             | Xylose isomerase [Termite Gut (version 3)]                                                              | Global / Pellet                                     | 449 | EC:5.3.1.5 | COG2115 | G | pfam01261                                        | TIGR02630 | No  | No  |
| 2005560485 | 3 / 4 / 2         | Xylose isomerase [Termite Gut (version 3)]                                                              | Global / Pellet / Supernatant                       | 257 |            | COG2115 | G | pfam01261                                        | TIGR02630 | No  | No  |
| 2005568675 | 2 / 2 / 2         | Xylose isomerase [Termite Gut (version 3)]                                                              | Soluble / Pellet / Supernatant                      | 114 |            | COG2115 | G |                                                  |           | No  | No  |
| 2005626660 | 2                 | Zn-dependent hydrolases, including glyoxylases [Termite Gut (version 3)]                                | Soluble                                             | 256 |            | COG0491 | R | pfam00753                                        |           | No  | No  |
| 2005576754 | 2                 | Zn-ribbon protein, possibly nucleic acid-binding [Termite Gut (version 3)]                              | Pellet                                              | 148 |            | COG1579 | R |                                                  |           | No  | No  |

\*Description may not be accurate, the EC number or Pfam identification is more accurate

§ Not all TIGRfams listed passed the analysis cutoff

pfams colored in red are included in Table 1

# Supplemental Table 4. Complete List of Proteins Identified with One Peptide

| Fraction Identified Protein was Identified from | IMG Gene Object Identifier | Pfams                         | Product Name (inexact)                                                                        | AA Seq Length | Enzymes      | COGs    | COG Categories | TIGRFams                      | Signal Peptide | Transmembrane Helices |
|-------------------------------------------------|----------------------------|-------------------------------|-----------------------------------------------------------------------------------------------|---------------|--------------|---------|----------------|-------------------------------|----------------|-----------------------|
| Pellet / Soluble / Supernatant                  | 2005583861                 | pfam00698                     | (acyl-carrier-protein) S-malonyltransferase                                                   | 186           |              | COG0331 | I              |                               | No             | No                    |
| Soluble                                         | 2005590399                 | pfam00698                     | (acyl-carrier-protein) S-malonyltransferase                                                   | 193           |              | COG0331 | I              |                               | No             | No                    |
| Soluble                                         | 2005602211                 | pfam00069                     | 15 Serine/threonine protein kinase                                                            | 180           |              | COG0515 | T R K L        |                               | No             | No                    |
| Pellet                                          | 200560980                  | pfam01553                     | 1-acyl-sn-glycerol-3-phosphate acyltransferase                                                | 213           |              | COG0204 | I              | TIGR00530                     | Yes            | Yes                   |
| Soluble                                         | 2005591659                 |                               | 2,3-bisphosphoglycerate-independent phosphoglycerate mutase                                   | 82            |              |         |                |                               | No             | No                    |
| Soluble                                         | 2005579448                 | pfam02542                     | 2C-methyl-D-erythritol 2,4-cyclodiphosphate synthase                                          | 158           | EC:4.6.1.12  | COG0245 | I              | TIGR00151                     | No             | No                    |
| Pellet                                          | 2005606816                 | pfam01081                     | 2-keto-3-deoxy-6-phosphogluconate aldolase                                                    | 239           | EC:4.1.2.14  | COG0800 | G              | TIGR01182                     | No             | No                    |
| Soluble                                         | 2005596198                 | pfam01557                     | 2-keto-4-pentenoate hydratase/2-oxohepta-3-ene-1,7-dioic acid hydratase (catechol pathway)    | 209           |              | COG0179 | Q              |                               | No             | No                    |
| Pellet                                          | 2005581685                 | pfam00919 pfam04055           | 2-methylthioadenine synthetase                                                                | 200           |              | COG0621 | J              |                               | No             | No                    |
| Soluble                                         | 2005612765                 | pfam00793                     | 3-deoxy-D-arabino-heptulosonate 7-phosphate (DAHP) synthase                                   | 118           |              | COG2876 | E              |                               | No             | No                    |
| Soluble                                         | 2005618721                 |                               | 3-deoxy-D-arabino-heptulosonate 7-phosphate (DAHP) synthase                                   | 93            |              | COG2876 | E              |                               | No             | No                    |
| Soluble                                         | 2005573739                 | pfam03446                     | 3-hydroxyisobutyrate dehydrogenase and related beta-hydroxyacid dehydrogenases                | 293           | EC:1.1.1.60  | COG2084 | I              | TIGR01505                     | No             | No                    |
| Pellet                                          | 2005574727                 | pfam07977                     | 3-hydroxymyristoyl/3-hydroxydecanoyl-acyl carrier protein dehydratases                        | 139           | EC:4.2.1.-   | COG0764 | I              | TIGR01750                     | No             | No                    |
| Pellet                                          | 2005630279                 | pfam07977                     | 3-hydroxymyristoyl/3-hydroxydecanoyl-acyl carrier protein dehydratases                        | 97            |              | COG0764 | I              |                               | No             | No                    |
| Pellet / Soluble                                | 2005577675                 | pfam00330                     | 3-isopropylmalate dehydratase large subunit                                                   | 432           | EC:4.2.1.33  | COG0065 | E              | TIGR00170 TIGR01343 TIGR02086 | No             | No                    |
| Pellet                                          | 2005589334                 | pfam00109 pfam02801           | 3-oxoacyl-acyl-carrier-protein synthase                                                       | 342           | EC:2.3.1.41  | COG0304 | Q I            |                               | No             | No                    |
| Pellet                                          | 2005613511                 | pfam00109 pfam02801           | 3-oxoacyl-acyl-carrier-protein synthase                                                       | 234           |              | COG0304 | I Q            |                               | Yes            | No                    |
| Soluble / Supernatant                           | 2005583864                 | pfam00109 pfam02801           | 3-oxoacyl-acyl-carrier-protein synthase                                                       | 196           |              | COG0304 | Q I            |                               | No             | No                    |
| Supernatant                                     | 2005574726                 | pfam00109 pfam02801           | 3-oxoacyl-acyl-carrier-protein synthase                                                       | 232           |              | COG0304 | Q I            |                               | No             | No                    |
| Supernatant                                     | 2005626222                 | pfam00109                     | 3-oxoacyl-acyl-carrier-protein synthase                                                       | 108           |              | COG0304 | Q I            |                               | No             | No                    |
| Soluble                                         | 2005566942                 | pfam00364 pfam08541 pfam08545 | 3-oxoacyl-acyl-carrier-protein synthase III                                                   | 441           |              | COG0332 | I              | TIGR00747                     | Yes            | No                    |
| Soluble                                         | 2005615878                 | pfam08541 pfam08545           | 3-oxoacyl-acyl-carrier-protein synthase III                                                   | 283           | EC:2.3.1.41  | COG0332 | I              | TIGR00747                     | No             | No                    |
| Global                                          | 2005571290                 | pfam00162                     | 3-phosphoglycerate kinase                                                                     | 364           | EC:2.7.2.3   | COG0126 | G              |                               | No             | No                    |
| Global / Pellet                                 | 2005585093                 | pfam00162                     | 3-phosphoglycerate kinase                                                                     | 420           | EC:2.7.2.3   | COG0126 | G              |                               | No             | No                    |
| Pellet / Supernatant / Soluble / Global         | 200560306                  | pfam00162                     | 3-phosphoglycerate kinase                                                                     | 58            |              | COG0126 | G              |                               | No             | No                    |
| Supernatant                                     | 2005574478                 | pfam00162                     | 3-phosphoglycerate kinase                                                                     | 420           | EC:2.7.2.3   | COG0126 | G              |                               | No             | No                    |
| Supernatant                                     | 2005623977                 | pfam00162                     | 3-phosphoglycerate kinase                                                                     | 205           |              | COG0126 | G              |                               | No             | No                    |
| Supernatant                                     | 2005632664                 | pfam00162                     | 3-phosphoglycerate kinase                                                                     | 54            |              | COG0126 | G              |                               | No             | No                    |
| Global / Pellet                                 | 2005574465                 | pfam02446                     | 4-alpha-glucanotransferase                                                                    | 472           |              | COG1640 | G              |                               | No             | No                    |
| Pellet                                          | 2005596594                 | pfam02446                     | 4-alpha-glucanotransferase                                                                    | 252           |              | COG1640 | G              |                               | No             | No                    |
| Pellet / Supernatant                            | 2005560385                 | pfam02446                     | 4-alpha-glucanotransferase                                                                    | 524           |              | COG1640 | G              | TIGR00217                     | No             | No                    |
| Supernatant                                     | 2005593986                 | pfam00202                     | 4-aminobutyrate aminotransferase and related aminotransferases                                | 261           |              | COG0160 | E              |                               | No             | No                    |
| Soluble                                         | 2005579413                 | pfam00288 pfam08544           | 4-diphosphocytidyl-2C-methyl-D-erythritol 2-phosphate synthase                                | 276           | EC:2.7.1.148 | COG1947 | I              | TIGR00154                     | No             | No                    |
| Soluble                                         | 200563635                  | pfam00763 pfam02882           | 5,10-methylene-tetrahydrofolate dehydrogenase/Methenyl tetrahydrofolate cyclohydrolase        | 283           | EC:3.5.4.9   | COG0190 | H              |                               | No             | No                    |
| Supernatant / Global                            | 2005613289                 | pfam01367 pfam02739           | 5'-3' exonuclease (including N-terminal domain of PolI)                                       | 262           |              | COG0258 | L              |                               | Yes            | No                    |
| Soluble                                         | 200562437                  | pfam00275                     | 5-enolpyruvylshikimate-3-phosphate synthase                                                   | 424           | EC:2.5.1.19  | COG0128 | E              | TIGR01356                     | No             | No                    |
| Supernatant                                     | 2005586717                 | pfam02872                     | 5'-nucleotidase/2',3'-cyclic phosphodiesterase and related esterases                          | 299           |              | COG0737 | F              |                               | No             | No                    |
| Supernatant                                     | 2005595113                 | pfam02872                     | 5'-nucleotidase/2',3'-cyclic phosphodiesterase and related esterases                          | 264           |              | COG0737 | F              |                               | No             | No                    |
| Pellet                                          | 2005561838                 | pfam03063                     | 6Fe-6S prismatic cluster-containing protein                                                   | 572           | EC:1.2.99.2  | COG1151 | C              | TIGR01702                     | No             | No                    |
| Pellet                                          | 2005572919                 | pfam03063                     | 6Fe-6S prismatic cluster-containing protein                                                   | 646           | EC:1.2.99.2  | COG1151 | C              | TIGR01702                     | No             | No                    |
| Global                                          | 2005596479                 | pfam00365                     | 6-phosphofructokinase                                                                         | 244           |              | COG0205 | G              |                               | Yes            | No                    |
| Pellet                                          | 2005579734                 | pfam00365                     | 6-phosphofructokinase                                                                         | 428           | EC:2.7.1.90  | COG0205 | G              |                               | No             | No                    |
| Pellet                                          | 2005615868                 |                               | 6-phosphofructokinase                                                                         | 237           |              | COG0205 | G              | TIGR02477                     | No             | No                    |
| Pellet                                          | 2005618376                 | pfam00365                     | 6-phosphofructokinase                                                                         | 268           |              | COG0205 | G              |                               | No             | No                    |
| Pellet                                          | 2005620927                 | pfam00365                     | 6-phosphofructokinase                                                                         | 284           |              | COG0205 | G              | TIGR02477                     | No             | No                    |
| Pellet / Global                                 | 2005610679                 | pfam00365                     | 6-phosphofructokinase                                                                         | 266           |              | COG0205 | G              |                               | No             | No                    |
| Pellet / Soluble                                | 2005593692                 | pfam00365                     | 6-phosphofructokinase                                                                         | 365           | EC:2.7.1.11  | COG0205 | G              |                               | No             | No                    |
| Pellet / Soluble                                | 2005606324                 | pfam00365                     | 6-phosphofructokinase                                                                         | 268           |              | COG0205 | G              | TIGR02477                     | No             | No                    |
| Pellet / Soluble                                | 2005562722                 | pfam00365                     | 6-phosphofructokinase                                                                         | 288           | EC:2.7.1.11  | COG0205 | G              |                               | No             | No                    |
| Pellet / Soluble                                | 200564480                  |                               | 6-phosphofructokinase                                                                         | 356           |              | COG0205 | G              | TIGR02477                     | No             | No                    |
| Pellet / Supernatant                            | 2005570608                 | pfam00365                     | 6-phosphofructokinase                                                                         | 287           | EC:2.7.1.90  | COG0205 | G              | TIGR02477                     | No             | No                    |
| Soluble                                         | 2005573119                 |                               | 6-phosphofructokinase                                                                         | 271           |              | COG0205 | G              | TIGR02477                     | No             | No                    |
| Soluble                                         | 2005573469                 | pfam00365                     | 6-phosphofructokinase                                                                         | 361           | EC:2.7.1.11  | COG0205 | G              | TIGR02483                     | No             | No                    |
| Soluble                                         | 2005575678                 | pfam00365                     | 6-phosphofructokinase                                                                         | 405           |              | COG0205 | G              | TIGR02477                     | No             | No                    |
| Soluble                                         | 2005578488                 | pfam00365                     | 6-phosphofructokinase                                                                         | 441           | EC:2.7.1.90  | COG0205 | G              |                               | No             | No                    |
| Soluble                                         | 2005587879                 | pfam00365                     | 6-phosphofructokinase                                                                         | 361           | EC:2.7.1.11  | COG0205 | G              | TIGR02483                     | No             | No                    |
| Soluble / Global                                | 2005614899                 |                               | 6-phosphofructokinase                                                                         | 294           |              | COG0205 | G              | TIGR02477                     | No             | No                    |
| Soluble / Global                                | 2005628812                 | pfam00365                     | 6-phosphofructokinase                                                                         | 241           |              | COG0205 | G              |                               | No             | No                    |
| Supernatant                                     | 2005590386                 | pfam00365                     | 6-phosphofructokinase                                                                         | 243           |              | COG0205 | G              |                               | No             | No                    |
| Supernatant                                     | 2005604324                 |                               | 6-phosphofructokinase                                                                         | 138           |              | COG0205 | G              |                               | No             | No                    |
| Supernatant / Soluble                           | 2005566194                 |                               | 6-phosphofructokinase                                                                         | 117           |              | COG0205 | G              |                               | No             | No                    |
| Supernatant / Soluble                           | 2005629625                 | pfam00365                     | 6-phosphofructokinase                                                                         | 224           |              | COG0205 | G              |                               | No             | No                    |
| Supernatant / Soluble / Global                  | 2005563490                 | pfam00365                     | 6-phosphofructokinase                                                                         | 297           |              | COG0205 | G              |                               | No             | No                    |
| Soluble                                         | 2005560566                 | pfam00393 pfam03446           | 6-phosphogluconate dehydrogenase                                                              | 458           | EC:1.1.1.44  | COG0362 | G              | TIGR00873                     | No             | No                    |
| Soluble                                         | 2005563596                 | pfam00393 pfam03446           | 6-phosphogluconate dehydrogenase                                                              | 485           | EC:1.1.1.44  | COG0362 | G              | TIGR00873                     | No             | No                    |
| Soluble                                         | 2005583634                 | pfam00393 pfam03446           | 6-phosphogluconate dehydrogenase                                                              | 489           | EC:1.1.1.44  | COG0362 | G              | TIGR00873                     | No             | No                    |
| Soluble                                         | 2005578638                 | pfam01230                     | 7 Diadenosine tetraphosphate (Ap4A) hydrolase and other HIT family hydrolases                 | 114           | EC:2.7.11.13 | COG0537 | F G R          |                               | No             | No                    |
| Pellet                                          | 2005565338                 | pfam00892                     | 7 Permeases of the drug/metabolite transporter (DMT) superfamily                              | 250           |              |         |                |                               | Yes            | Yes                   |
| Supernatant                                     | 2005576349                 | pfam00083                     | 77 Permeases of the major facilitator superfamily                                             | 477           | EC:5.3.1.4   |         |                | TIGR00879                     | No             | Yes                   |
| Pellet                                          | 2005598919                 | pfam00106                     | 8 Dehydrogenases with different specificities (related to short-chain alcohol dehydrogenases) | 136           |              | COG1028 | Q I R          |                               | No             | No                    |
| Pellet                                          | 2005601001                 | pfam00106                     | 8 Dehydrogenases with different specificities (related to short-chain alcohol dehydrogenases) | 236           | EC:1.1.1.100 | COG1028 | R Q I          | TIGR01830                     | No             | No                    |
| Pellet                                          | 2005627752                 | pfam00106                     | 8 Dehydrogenases with different specificities (related to short-chain alcohol dehydrogenases) | 235           |              | COG0300 | R              |                               | No             | No                    |
| Pellet / Insoluble                              | 200563322                  | pfam00106                     | 8 Dehydrogenases with different specificities (related to short-chain alcohol dehydrogenases) | 245           | EC:1.1.1.100 | COG1028 | I R Q          | TIGR01830                     | No             | No                    |
| Pellet / Supernatant                            | 2005566632                 | pfam00005                     | ABC-type (unclassified) transport system, ATPase component                                    | 244           | EC:3.6.3.-   | COG1137 | R              |                               | No             | No                    |
| Pellet                                          | 2005575930                 | pfam00497                     | ABC-type amino acid transport/signal transduction systems, periplasmic component/domain       | 137           |              | COG0834 | E T            |                               | No             | No                    |
| Soluble                                         | 2005631081                 | pfam00497                     | ABC-type amino acid transport/signal transduction systems, periplasmic component/domain       | 174           |              | COG0834 | T E            |                               | No             | No                    |
| Pellet                                          | 2005564726                 | pfam00005                     | ABC-type antimicrobial peptide transport system, ATPase component                             | 241           | EC:3.6.3.25  | COG1136 | V              |                               | No             | No                    |
| Pellet                                          | 2005573053                 | pfam00005                     | ABC-type antimicrobial peptide transport system, ATPase component                             | 247           | EC:3.6.3.25  | COG1136 | V              |                               | No             | No                    |
| Pellet                                          | 2005617151                 | pfam02687                     | ABC-type antimicrobial peptide transport system, permease component                           | 282           |              | COG0577 | V              |                               | Yes            | Yes                   |
| Pellet                                          | 2005592407                 | pfam02653                     | ABC-type branched-chain amino acid transport system, permease component                       | 246           |              | COG4177 | E              |                               | Yes            | Yes                   |
| Pellet                                          | 2005580007                 | pfam00005                     | ABC-type branched-chain amino acid transport system, ATPase component                         | 243           | EC:3.6.3.27  | COG0410 | E              |                               | No             | No                    |
| Supernatant                                     | 2005572307                 | pfam00005                     | ABC-type branched-chain amino acid transport system, ATPase component                         | 233           | EC:3.6.3.-   | COG0410 | E              | TIGR03410                     | No             | No                    |
| Supernatant                                     | 2005580569                 | pfam00005                     | ABC-type branched-chain amino acid transport system, ATPase component                         | 208           | EC:3.6.3.27  | COG0410 | E              |                               | No             | No                    |

|                                                     |            |                     |                                                                               |     |             |         |     |           |     |     |
|-----------------------------------------------------|------------|---------------------|-------------------------------------------------------------------------------|-----|-------------|---------|-----|-----------|-----|-----|
| Global                                              | 2005596742 |                     | ABC-type branched-chain amino acid transport syst ems, periplasmic component  | 187 |             | COG0683 | E   |           | No  | No  |
| Global / Insoluble / Pellet / Soluble               | 2005592629 | pfam01094           | ABC-type branched-chain amino acid transport syst ems, periplasmic component  | 372 |             | COG0683 | E   |           | Yes | No  |
| Pellet                                              | 2005561042 | pfam01094           | ABC-type branched-chain amino acid transport syst ems, periplasmic component  | 219 |             | COG0683 | E   |           | No  | No  |
| Soluble                                             | 2005592409 | pfam01094           | ABC-type branched-chain amino acid transport syst ems, periplasmic component  | 355 |             | COG0683 | E   |           | No  | No  |
| Supernatant                                         | 2005580011 | pfam01094           | ABC-type branched-chain amino acid transport syst ems, periplasmic component  | 218 |             | COG0683 | E   |           | No  | No  |
| Soluble                                             | 2005578266 | pfam00005           | ABC-type cobalt transport system, ATPase componen t                           | 414 |             | COG1122 | P   |           | No  | No  |
| Global                                              | 2005577038 | pfam00496           | ABC-type dipeptide transport system, periplasmic component                    | 421 |             | COG0747 | E   |           | No  | No  |
| Global / Pellet                                     | 2005577431 | pfam00496           | ABC-type dipeptide transport system, periplasmic component                    | 284 |             | COG0747 | E   |           | No  | No  |
| Global / Pellet                                     | 2005605136 | pfam00496           | ABC-type dipeptide transport system, periplasmic component                    | 277 |             | COG0747 | E   |           | No  | No  |
| Insoluble                                           | 2005627328 | pfam00496           | ABC-type dipeptide transport system, periplasmic component                    | 262 |             | COG0747 | E   |           | No  | No  |
| Pellet                                              | 2005564850 | pfam00496           | ABC-type dipeptide transport system, periplasmic component                    | 327 |             | COG0747 | E   |           | Yes | Yes |
| Pellet                                              | 2005568793 | pfam00496           | ABC-type dipeptide transport system, periplasmic component                    | 373 |             | COG0747 | E   |           | No  | No  |
| Pellet                                              | 2005597097 | pfam00496           | ABC-type dipeptide transport system, periplasmic component                    | 277 |             | COG0747 | E   |           | No  | No  |
| Insoluble / Soluble                                 | 2005587057 | pfam00005 pfam08352 | ABC-type dipeptide/oligopeptide/nickel transport system, ATPase component     | 259 | EC:2.7.2.3  | COG0444 | P E |           | No  | No  |
| Pellet                                              | 2005595264 | pfam00005 pfam08352 | ABC-type dipeptide/oligopeptide/nickel transport system, ATPase component     | 213 |             | COG0444 | P E | TIGR01727 | No  | No  |
| Supernatant                                         | 2005588015 |                     | ABC-type dipeptide/oligopeptide/nickel transport system, ATPase component     | 114 |             | COG0444 | E P |           | No  | No  |
| Pellet                                              | 2005577039 | pfam00528           | ABC-type dipeptide/oligopeptide/nickel transport systems, permease components | 358 | EC:3.6.3.-  | COG0601 | P E |           | Yes | Yes |
| Supernatant                                         | 2005572382 |                     | ABC-type Fe3+ transport system, periplasmic compo nent                        | 176 |             | COG1840 | P   |           | No  | No  |
| Soluble                                             | 2005586207 | pfam01032           | ABC-type Fe3+-siderophore transport system, perme ase component               | 303 |             | COG0609 | P   |           | No  | Yes |
| Pellet                                              | 2005609793 | pfam01297           | ABC-type metal ion transport system, periplasmic component/surface adhesion   | 94  |             | COG0803 | P   |           | No  | No  |
| Supernatant                                         | 2005564605 | pfam03180           | ABC-type metal ion transport system, periplasmic component/surface antigen    | 131 |             | COG1464 | P   |           | Yes | No  |
| Pellet                                              | 2005561997 | pfam00005           | ABC-type multidrug transport system, ATPase compo nent                        | 305 | EC:3.6.3.30 | COG1131 | V   |           | No  | No  |
| Pellet                                              | 2005595438 | pfam01061           | ABC-type multidrug transport system, permease com ponent                      | 368 |             | COG0842 | V   |           | Yes | Yes |
| Pellet                                              | 2005561711 | pfam00005 pfam08352 | ABC-type oligopeptide transport system, ATPase co mponent                     | 343 | EC:3.6.3.30 | COG4608 | E   |           | No  | No  |
| Pellet                                              | 2005574185 | pfam00005           | ABC-type oligopeptide transport system, ATPase co mponent                     | 260 | EC:2.7.2.3  | COG4608 | E   |           | No  | No  |
| Supernatant                                         | 2005601746 | pfam00005           | ABC-type oligopeptide transport system, ATPase co mponent                     | 102 |             | COG4608 | E   |           | No  | No  |
| Pellet                                              | 2005579450 | pfam00496           | ABC-type oligopeptide transport system, periplasm ic component                | 281 |             | COG4166 | E   |           | Yes | No  |
| Pellet / Supernatant                                | 2005599861 | pfam00496           | ABC-type oligopeptide transport system, periplasm ic component                | 269 |             | COG4166 | E   |           | No  | No  |
| Supernatant                                         | 2005590732 |                     | ABC-type oligopeptide transport system, periplasm ic component                | 216 |             |         |     |           | No  | No  |
| Supernatant / Soluble                               | 2005610970 | pfam00496           | ABC-type oligopeptide transport system, periplasm ic component                | 277 |             | COG4166 | E   |           | No  | No  |
| Insoluble                                           | 2005566343 |                     | ABC-type phosphate transport system, periplasmic component                    | 192 |             | COG0226 | P   |           | No  | No  |
| Insoluble / Global                                  | 2005611541 |                     | ABC-type phosphate transport system, periplasmic component                    | 252 | EC:3.6.3.27 | COG0226 | P   | TIGR02136 | No  | No  |
| Pellet                                              | 2005589232 | pfam01547           | ABC-type phosphate transport system, periplasmic component                    | 275 | EC:3.6.3.27 | COG0226 | P   | TIGR02136 | Yes | Yes |
| Pellet                                              | 2005613287 |                     | ABC-type phosphate transport system, periplasmic component                    | 286 |             | COG0226 | P   |           | No  | No  |
| Pellet / Supernatant                                | 2005578034 |                     | ABC-type phosphate transport system, periplasmic component                    | 193 |             | COG0226 | P   |           | No  | No  |
| Soluble                                             | 2005615081 |                     | ABC-type phosphate transport system, periplasmic component                    | 236 | EC:3.6.3.27 | COG0226 | P   | TIGR02136 | No  | No  |
| Supernatant                                         | 2005580272 |                     | ABC-type phosphate transport system, periplasmic component                    | 257 |             | COG0226 | P   |           | No  | No  |
| Supernatant                                         | 2005594981 |                     | ABC-type phosphate transport system, periplasmic component                    | 123 |             | COG0226 | P   |           | No  | No  |
| Pellet / Supernatant                                | 2005578035 | pfam00528           | ABC-type phosphate transport system, permease com ponent                      | 299 |             | COG0573 | P   |           | Yes | Yes |
| Pellet                                              | 2005567169 | pfam00005           | ABC-type polar amino acid transport system, ATPas e component                 | 258 | EC:3.6.3.21 | COG1126 | E   |           | No  | No  |
| Supernatant                                         | 2005566420 | pfam00528           | ABC-type spermidine/putrescine transport system, permease component II        | 169 |             | COG1177 | E   |           | No  | Yes |
| Pellet                                              | 2005562047 | pfam08402           | ABC-type spermidine/putrescine transport systems, ATPase components           | 111 |             | COG3842 | E   |           | No  | No  |
| Pellet                                              | 2005569095 | pfam00005 pfam08402 | ABC-type spermidine/putrescine transport systems, ATPase components           | 364 | EC:3.6.3.30 | COG3842 | E   |           | No  | No  |
| Pellet / Supernatant / Insoluble / Global           | 2005560275 | pfam00005 pfam08402 | ABC-type spermidine/putrescine transport systems, ATPase components           | 344 | EC:3.6.3.31 | COG3842 | E   |           | No  | No  |
| Pellet                                              | 2005567825 | pfam00005           | ABC-type sugar transport system, ATPase component                             | 158 |             | COG1129 | G   |           | No  | No  |
| Pellet                                              | 2005587510 | pfam00005           | ABC-type sugar transport system, ATPase component                             | 176 |             | COG1129 | G   |           | No  | No  |
| Pellet                                              | 2005610324 | pfam00005           | ABC-type sugar transport system, ATPase component                             | 177 |             | COG1129 | G   |           | No  | No  |
| Pellet                                              | 2005616383 | pfam00005           | ABC-type sugar transport system, ATPase component                             | 209 |             | COG1129 | G   |           | No  | No  |
| Global                                              | 2005617961 |                     | ABC-type sugar transport system, periplasmic comp onent                       | 139 |             |         |     |           | No  | No  |
| Global                                              | 2005619660 |                     | ABC-type sugar transport system, periplasmic comp onent                       | 217 |             | COG1879 | G   |           | Yes | Yes |
| Global                                              | 2005621987 |                     | ABC-type sugar transport system, periplasmic comp onent                       | 139 |             |         |     |           | No  | No  |
| Global / Insoluble / Pellet / Soluble / Supernatant | 2005586682 | pfam01547           | ABC-type sugar transport system, periplasmic comp onent                       | 445 |             | COG1653 | G   |           | Yes | Yes |
| Global / Insoluble / Pellet / Supernatant           | 2005607413 |                     | ABC-type sugar transport system, periplasmic comp onent                       | 155 |             |         |     |           | No  | No  |
| Global / Insoluble / Soluble                        | 2005576822 |                     | ABC-type sugar transport system, periplasmic comp onent                       | 464 |             | COG1653 | G   |           | Yes | Yes |
| Global / Pellet                                     | 2005584134 |                     | ABC-type sugar transport system, periplasmic comp onent                       | 90  |             |         |     |           | No  | No  |
| Global / Supernatant                                | 2005580209 | pfam01547           | ABC-type sugar transport system, periplasmic comp onent                       | 306 |             | COG1653 | G   |           | No  | No  |
| Insoluble                                           | 2005572933 |                     | ABC-type sugar transport system, periplasmic comp onent                       | 265 |             | COG1879 | G   |           | No  | No  |
| Insoluble                                           | 2005577077 | pfam01547           | ABC-type sugar transport system, periplasmic comp onent                       | 526 |             | COG1653 | G   |           | Yes | Yes |
| Insoluble / Soluble                                 | 2005628720 |                     | ABC-type sugar transport system, periplasmic comp onent                       | 260 |             | COG1653 | G   |           | No  | No  |
| Insoluble / Soluble / Supernatant                   | 2005589326 |                     | ABC-type sugar transport system, periplasmic comp onent                       | 334 |             | COG1879 | G   |           | Yes | No  |
| Pellet                                              | 2005567044 | pfam01547           | ABC-type sugar transport system, periplasmic comp onent                       | 817 |             | COG1653 | G   |           | No  | No  |
| Pellet                                              | 2005569177 |                     | ABC-type sugar transport system, periplasmic comp onent                       | 418 |             | COG1653 | G   |           | No  | No  |
| Pellet                                              | 2005571362 |                     | ABC-type sugar transport system, periplasmic comp onent                       | 107 |             |         |     |           | Yes | Yes |
| Pellet                                              | 2005574399 |                     | ABC-type sugar transport system, periplasmic comp onent                       | 250 |             | COG1879 | G   |           | No  | No  |
| Pellet                                              | 2005584135 |                     | ABC-type sugar transport system, periplasmic comp onent                       | 298 |             | COG1653 | G   |           | No  | No  |
| Pellet                                              | 2005592637 | pfam01547           | ABC-type sugar transport system, periplasmic comp onent                       | 279 |             | COG1653 | G   |           | No  | No  |
| Pellet                                              | 2005606584 | pfam00532           | ABC-type sugar transport system, periplasmic comp onent                       | 242 |             | COG1879 | G   |           | No  | No  |
| Pellet                                              | 2005617713 |                     | ABC-type sugar transport system, periplasmic comp onent                       | 140 |             |         |     |           | No  | No  |
| Pellet                                              | 2005624050 | pfam01547           | ABC-type sugar transport system, periplasmic comp onent                       | 251 |             | COG1653 | G   |           | No  | No  |
| Pellet / Global                                     | 2005615151 | pfam01547           | ABC-type sugar transport system, periplasmic comp onent                       | 276 |             | COG1653 | G   |           | No  | No  |
| Pellet / Soluble / Supernatant                      | 2005579187 |                     | ABC-type sugar transport system, periplasmic comp onent                       | 466 |             | COG1653 | G   |           | Yes | Yes |
| Pellet / Supernatant                                | 2005573676 |                     | ABC-type sugar transport system, periplasmic comp onent                       | 217 |             |         |     |           | No  | No  |
| Pellet / Supernatant                                | 2005610354 | pfam01547           | ABC-type sugar transport system, periplasmic comp onent                       | 277 |             | COG1653 | G   |           | No  | No  |
| Pellet / Supernatant                                | 2005565603 | pfam01547           | ABC-type sugar transport system, periplasmic comp onent                       | 626 |             | COG1653 | G   |           | No  | No  |
| Pellet / Supernatant                                | 2005569921 |                     | ABC-type sugar transport system, periplasmic comp onent                       | 240 |             | COG1879 | G   |           | No  | No  |
| Pellet / Supernatant                                | 2005615531 |                     | ABC-type sugar transport system, periplasmic comp onent                       | 286 |             | COG1879 | G   |           | Yes | Yes |
| Pellet / Supernatant / Insoluble                    | 2005631313 |                     | ABC-type sugar transport system, periplasmic comp onent                       | 127 |             | COG1879 | G   |           | No  | No  |
| Pellet / Supernatant / Soluble                      | 2005610648 |                     | ABC-type sugar transport system, periplasmic comp onent                       | 278 |             | COG1653 | G   |           | No  | No  |
| Pellet / Supernatant / Soluble / Global             | 2005627924 |                     | ABC-type sugar transport system, periplasmic comp onent                       | 260 |             |         |     |           | No  | No  |
| Soluble                                             | 2005563831 |                     | ABC-type sugar transport system, periplasmic comp onent                       | 379 |             | COG1653 | G   |           | Yes | No  |
| Soluble                                             | 2005579429 |                     | ABC-type sugar transport system, periplasmic comp onent                       | 157 |             |         |     |           | No  | No  |
| Soluble                                             | 2005585055 |                     | ABC-type sugar transport system, periplasmic comp onent                       | 360 |             | COG1653 | G   |           | No  | No  |
| Soluble                                             | 2005610716 |                     | ABC-type sugar transport system, periplasmic comp onent                       | 261 |             | COG1653 | G   |           | No  | No  |
| Soluble                                             | 2005612047 | pfam01547           | ABC-type sugar transport system, periplasmic comp onent                       | 269 |             | COG1653 | G   |           | Yes | No  |
| Soluble                                             | 2005626749 |                     | ABC-type sugar transport system, periplasmic comp onent                       | 256 |             | COG1653 | G   |           | No  | No  |
| Soluble                                             | 2005628438 | pfam01547           | ABC-type sugar transport system, periplasmic comp onent                       | 274 |             | COG1653 | G   |           | Yes | Yes |
| Soluble                                             | 2005628816 | pfam01547           | ABC-type sugar transport system, periplasmic comp onent                       | 264 |             | COG1653 | G   |           | No  | No  |

|                                           |            |                               |                                                                                                        |      |             |         |     |           |     |     |
|-------------------------------------------|------------|-------------------------------|--------------------------------------------------------------------------------------------------------|------|-------------|---------|-----|-----------|-----|-----|
| Soluble                                   | 2005631996 |                               | ABC-type sugar transport system, periplasmic component                                                 | 92   |             |         |     |           | No  | No  |
| Soluble / Supernatant                     | 2005569751 |                               | ABC-type sugar transport system, periplasmic component                                                 | 339  |             | COG1653 | G   |           | No  | No  |
| Supernatant                               | 2005568031 | pfam01547                     | ABC-type sugar transport system, periplasmic component                                                 | 373  |             | COG1653 | G   |           | No  | No  |
| Supernatant                               | 2005570857 |                               | ABC-type sugar transport system, periplasmic component                                                 | 452  |             | COG1653 | G   |           | No  | No  |
| Supernatant                               | 2005572107 |                               | ABC-type sugar transport system, periplasmic component                                                 | 127  |             |         |     |           | No  | No  |
| Supernatant                               | 2005575414 |                               | ABC-type sugar transport system, periplasmic component                                                 | 255  |             | COG1879 | G   |           | No  | No  |
| Supernatant                               | 2005585050 |                               | ABC-type sugar transport system, periplasmic component                                                 | 208  |             |         |     |           | No  | No  |
| Supernatant                               | 2005589419 |                               | ABC-type sugar transport system, periplasmic component                                                 | 233  |             |         |     |           | No  | No  |
| Supernatant                               | 2005593416 | pfam01547                     | ABC-type sugar transport system, periplasmic component                                                 | 433  |             | COG1653 | G   |           | No  | No  |
| Supernatant                               | 2005600373 |                               | ABC-type sugar transport system, periplasmic component                                                 | 185  |             | COG1879 | G   |           | No  | No  |
| Supernatant / Soluble                     | 200560307  |                               | ABC-type sugar transport system, periplasmic component                                                 | 229  |             | COG1653 | G   |           | No  | No  |
| Supernatant / Soluble / Global            | 2005625525 |                               | ABC-type sugar transport system, periplasmic component                                                 | 263  |             | COG1653 | G   |           | No  | No  |
| Pellet                                    | 2005564524 | pfam00528                     | ABC-type sugar transport system, permease component                                                    | 280  |             | COG0395 | G   |           | Yes | Yes |
| Supernatant                               | 2005620062 | pfam00528                     | ABC-type sugar transport system, permease component                                                    | 268  |             | COG0395 | G   |           | Yes | Yes |
| Global                                    | 2005574879 | pfam00005 pfam08402           | ABC-type sugar transport systems, ATPase components                                                    | 278  | EC:3.6.3.20 | COG3839 | G   |           | No  | No  |
| Global / Supernatant                      | 2005600790 | pfam08402                     | ABC-type sugar transport systems, ATPase components                                                    | 195  |             | COG3839 | G   |           | No  | No  |
| Insoluble / Soluble                       | 2005573637 | pfam00005 pfam08402           | ABC-type sugar transport systems, ATPase components                                                    | 341  | EC:3.6.3.20 | COG3839 | G   |           | No  | No  |
| Insoluble / Soluble / Global              | 2005566593 | pfam03459                     | ABC-type sugar transport systems, ATPase components                                                    | 170  |             | COG3839 | G   |           | No  | No  |
| Insoluble / Soluble / Global              | 2005566965 | pfam03459                     | ABC-type sugar transport systems, ATPase components                                                    | 197  |             | COG3839 | G   |           | No  | No  |
| Pellet                                    | 2005633176 | pfam00005                     | ABC-type sugar transport systems, ATPase components                                                    | 199  |             | COG3839 | G   |           | No  | No  |
| Pellet / Supernatant                      | 2005587089 | pfam03459                     | ABC-type sugar transport systems, ATPase components                                                    | 170  |             | COG3839 | G   |           | No  | No  |
| Supernatant                               | 2005578322 | pfam00005 pfam03459           | ABC-type sugar transport systems, ATPase components                                                    | 270  |             | COG3839 | G   |           | No  | No  |
| Supernatant / Global                      | 2005615134 | pfam03459                     | ABC-type sugar transport systems, ATPase components                                                    | 170  |             | COG3839 | G   |           | No  | No  |
| Pellet                                    | 2005629869 | pfam00528                     | ABC-type sugar transport systems, permease components                                                  | 256  |             | COG1175 | G   |           | Yes | Yes |
| Pellet                                    | 2005631610 | pfam01547                     | ABC-type thiamine transport system, periplasmic component                                              | 209  |             | COG4143 | H   | TIGR01254 | No  | No  |
| Pellet                                    | 2005591701 | pfam00005                     | ABC-type transport system involved in cytochrome bd biosynthesis, fused ATPase and permease components | 426  | EC:3.6.3.27 | COG4987 | C O |           | No  | Yes |
| Global                                    | 2005608604 | pfam02687                     | ABC-type transport system, involved in lipoprotein release, permease component                         | 256  |             | COG4591 | M   |           | No  | Yes |
| Pellet                                    | 200562158  | pfam02687                     | ABC-type transport system, involved in lipoprotein release, permease component                         | 342  |             | COG4591 | M   |           | No  | Yes |
| Supernatant                               | 2005586550 | pfam02687                     | ABC-type transport system, involved in lipoprotein release, permease component                         | 338  |             | COG4591 | M   |           | Yes | Yes |
| Pellet                                    | 2005576873 | pfam09822                     | ABC-type uncharacterized transport system involved in gliding motility, auxiliary component            | 433  |             | COG3225 | N   |           | No  | Yes |
| Pellet                                    | 2005563826 | pfam02653                     | ABC-type uncharacterized transport system, permease component                                          | 183  |             | COG4603 | R   |           | Yes | Yes |
| Pellet                                    | 2005596832 | pfam00005                     | ABC-type uncharacterized transport systems, ATPase components                                          | 233  |             | COG3845 | R   |           | No  | No  |
| Global / Insoluble / Soluble              | 2005591618 |                               | ABC-type xylose transport system, periplasmic component                                                | 193  |             | COG4213 | G   |           | No  | No  |
| Global / Pellet / Soluble / Supernatant   | 2005608350 |                               | ABC-type xylose transport system, periplasmic component                                                | 259  |             | COG4213 | G   |           | No  | No  |
| Insoluble                                 | 2005581567 |                               | ABC-type xylose transport system, periplasmic component                                                | 224  |             | COG4213 | G   |           | Yes | No  |
| Insoluble                                 | 2005616382 |                               | ABC-type xylose transport system, periplasmic component                                                | 223  |             | COG4213 | G   |           | No  | No  |
| Insoluble / Pellet                        | 2005600889 |                               | ABC-type xylose transport system, periplasmic component                                                | 196  |             | COG4213 | G   |           | No  | No  |
| Pellet / Insoluble                        | 200564015  |                               | ABC-type xylose transport system, periplasmic component                                                | 373  |             | COG4213 | G   |           | Yes | No  |
| Soluble                                   | 2005617407 |                               | ABC-type xylose transport system, periplasmic component                                                | 98   |             | COG4213 | G   |           | No  | No  |
| Pellet                                    | 200567572  | pfam02653                     | ABC-type xylose transport system, permease component                                                   | 286  |             | COG4214 | G   |           | Yes | Yes |
| Global                                    | 2005596484 | pfam00871                     | Acetate kinase                                                                                         | 293  | EC:2.7.2.1  | COG0282 | C   | TIGR00016 | Yes | No  |
| Pellet                                    | 2005592136 | pfam00871                     | Acetate kinase                                                                                         | 285  |             | COG0282 | C   | TIGR00016 | No  | No  |
| Soluble                                   | 2005611605 |                               | Acetate kinase                                                                                         | 55   |             |         |     |           | No  | No  |
| Soluble                                   | 2005622598 | pfam00871                     | Acetate kinase                                                                                         | 98   |             | COG0282 | C   |           | No  | No  |
| Supernatant                               | 2005562626 | pfam00871                     | Acetate kinase                                                                                         | 418  | EC:2.7.2.1  | COG0282 | C   | TIGR00016 | No  | No  |
| Global                                    | 2005564693 | pfam03255                     | Acetyl-CoA carboxylase alpha subunit                                                                   | 266  | EC:6.4.1.2  | COG0825 | I   | TIGR00513 | No  | No  |
| Pellet                                    | 2005580396 | pfam03255                     | Acetyl-CoA carboxylase alpha subunit                                                                   | 268  | EC:6.4.1.2  | COG0825 | I   | TIGR00513 | No  | No  |
| Global / Pellet / Soluble / Supernatant   | 2005570702 | pfam01039                     | Acetyl-CoA carboxylase beta subunit                                                                    | 206  |             | COG0777 | I   | TIGR00515 | No  | No  |
| Soluble / Global                          | 2005567354 | pfam01039                     | Acetyl-CoA carboxylase beta subunit                                                                    | 254  | EC:6.4.1.2  | COG0777 | I   | TIGR00515 | No  | No  |
| Pellet                                    | 2005570097 | pfam01039                     | Acetyl-CoA carboxylase, carboxyltransferase component (subunits alpha and beta)                        | 243  |             | COG4799 | I   |           | No  | No  |
| Pellet                                    | 2005591168 | pfam01039                     | Acetyl-CoA carboxylase, carboxyltransferase component (subunits alpha and beta)                        | 514  | EC:6.4.1.3  | COG4799 | I   |           | No  | No  |
| Pellet                                    | 2005594585 | pfam01039                     | Acetyl-CoA carboxylase, carboxyltransferase component (subunits alpha and beta)                        | 519  | EC:6.4.1.3  | COG4799 | I   |           | No  | No  |
| Pellet / Soluble                          | 2005606658 | pfam01039                     | Acetyl-CoA carboxylase, carboxyltransferase component (subunits alpha and beta)                        | 166  |             | COG4799 | I   |           | No  | No  |
| Pellet / Soluble / Supernatant            | 2005573405 | pfam01039                     | Acetyl-CoA carboxylase, carboxyltransferase component (subunits alpha and beta)                        | 266  |             | COG4799 | I   |           | No  | No  |
| Soluble                                   | 2005587977 | pfam02550                     | Acetyl-CoA hydrolase                                                                                   | 322  |             | COG0427 | C   |           | No  | No  |
| Pellet                                    | 2005560515 | pfam01546                     | Acetylornithine deacetylase/Succinyl-diaminopimelate desuccinylase and related deacylases              | 415  | EC:3.5.1.18 | COG0624 | E   | TIGR03320 | No  | No  |
| Pellet                                    | 2005574228 | pfam01546                     | Acetylornithine deacetylase/Succinyl-diaminopimelate desuccinylase and related deacylases              | 401  | EC:3.5.1.18 | COG0624 | E   | TIGR03320 | No  | No  |
| Pellet                                    | 2005586332 | pfam01546                     | Acetylornithine deacetylase/Succinyl-diaminopimelate desuccinylase and related deacylases              | 410  | EC:3.5.1.18 | COG0624 | E   | TIGR01910 | No  | No  |
| Soluble                                   | 2005567616 | pfam01546                     | Acetylornithine deacetylase/Succinyl-diaminopimelate desuccinylase and related deacylases              | 139  |             | COG0624 | E   |           | No  | No  |
| Supernatant                               | 2005585965 | pfam07687                     | Acetylornithine deacetylase/Succinyl-diaminopimelate desuccinylase and related deacylases              | 234  |             | COG0624 | E   |           | No  | No  |
| Pellet / Soluble                          | 2005583120 | pfam00330                     | Aconitase A                                                                                            | 657  | EC:4.2.1.3  | COG1048 | C   |           | No  | No  |
| Soluble                                   | 2005570823 |                               | Aconitase A                                                                                            | 369  |             | COG1048 | C   |           | No  | No  |
| Soluble                                   | 2005597259 | pfam01842                     | ACT domain-containing protein                                                                          | 138  | EC:2.2.1.6  | COG4747 | R   |           | No  | No  |
| Soluble / Global                          | 2005561007 | pfam01842                     | ACT domain-containing protein                                                                          | 138  | EC:2.2.1.6  | COG4747 | R   |           | No  | No  |
| Soluble / Supernatant                     | 2005568472 | pfam01842                     | ACT domain-containing protein                                                                          | 138  | EC:2.2.1.6  | COG4747 | R   |           | No  | No  |
| Soluble / Supernatant                     | 2005579473 | pfam01842                     | ACT domain-containing protein                                                                          | 138  | EC:2.2.1.6  | COG4747 | R   |           | No  | No  |
| Soluble / Supernatant                     | 2005592391 | pfam01842                     | ACT domain-containing protein                                                                          | 139  | EC:2.2.1.6  | COG4747 | R   |           | No  | No  |
| Global                                    | 2005562837 | pfam06723                     | Actin-like ATPase involved in cell morphogenesis                                                       | 263  | EC:3.6.1.-  | COG1077 | D   | TIGR00904 | No  | No  |
| Insoluble / Supernatant                   | 2005571976 | pfam06723                     | Actin-like ATPase involved in cell morphogenesis                                                       | 299  | EC:3.6.1.-  | COG1077 | D   | TIGR00904 | No  | No  |
| Pellet                                    | 2005568132 | pfam06723                     | Actin-like ATPase involved in cell morphogenesis                                                       | 138  |             | COG1077 | D   | TIGR00904 | No  | No  |
| Pellet                                    | 2005568134 | pfam06723                     | Actin-like ATPase involved in cell morphogenesis                                                       | 246  |             | COG1077 | D   | TIGR00904 | No  | No  |
| Pellet                                    | 2005620149 | pfam06723                     | Actin-like ATPase involved in cell morphogenesis                                                       | 189  |             | COG1077 | D   | TIGR00904 | No  | No  |
| Pellet / Supernatant / Insoluble / Global | 2005632672 | pfam06723                     | Actin-like ATPase involved in cell morphogenesis                                                       | 44   |             | COG1077 | D   |           | No  | No  |
| Pellet                                    | 2005581487 | pfam01869 pfam09989           | Activator of 2-hydroxyglutaryl-CoA dehydratase (HSP70-class ATPase domain)                             | 1241 |             | COG1924 | I   | TIGR00241 | Yes | No  |
| Pellet                                    | 2005583435 | pfam01869 pfam09989           | Activator of 2-hydroxyglutaryl-CoA dehydratase (HSP70-class ATPase domain)                             | 962  |             | COG3580 | S   |           | No  | No  |
| Pellet                                    | 2005587582 | pfam01869                     | Activator of 2-hydroxyglutaryl-CoA dehydratase (HSP70-class ATPase domain)                             | 396  |             | COG1924 | I   | TIGR00241 | No  | No  |
| Pellet                                    | 2005632019 | pfam01869                     | Activator of 2-hydroxyglutaryl-CoA dehydratase (HSP70-class ATPase domain)                             | 261  |             | COG1924 | I   |           | No  | No  |
| Soluble                                   | 2005582518 | pfam00550                     | Acyl carrier protein                                                                                   | 78   |             | COG0236 | Q I | TIGR00517 | No  | No  |
| Supernatant                               | 2005563323 | pfam00550                     | Acyl carrier protein                                                                                   | 78   |             | COG0236 | Q I | TIGR00517 | No  | No  |
| Supernatant                               | 2005581888 | pfam00550                     | Acyl carrier protein                                                                                   | 78   |             | COG0236 | I Q | TIGR00517 | No  | No  |
| Soluble                                   | 200567752  | pfam01144                     | Acyl CoA                                                                                               | 224  | EC:2.8.3.9  | COG1788 | I   | TIGR02429 | No  | No  |
| Pellet / Insoluble                        | 2005563859 | pfam00441                     | Acyl-CoA dehydrogenases                                                                                | 329  |             | COG1960 | I   |           | No  | No  |
| Soluble                                   | 2005560446 | pfam00441 pfam02770 pfam02771 | Acyl-CoA dehydrogenases                                                                                | 577  | EC:1.3.99.- | COG1960 | I   |           | No  | No  |
| Soluble                                   | 2005570116 | pfam00441 pfam02770 pfam02771 | Acyl-CoA dehydrogenases                                                                                | 505  | EC:1.3.99.- | COG1960 | I   |           | No  | No  |
| Supernatant                               | 2005563326 | pfam02771                     | Acyl-CoA dehydrogenases                                                                                | 87   |             | COG1960 | I   |           | No  | No  |
| Supernatant / Soluble / Global            | 200567739  | pfam00441 pfam02770 pfam02771 | Acyl-CoA dehydrogenases                                                                                | 573  | EC:1.3.99.- | COG1960 | I   |           | No  | No  |
| Soluble                                   | 2005561926 | pfam00501                     | Acyl-CoA synthetases (AMP-forming)/AMP-acid ligases II                                                 | 342  |             | COG0318 | I Q |           | No  | Yes |



|                                         |            |                     |                                                                                        |      |                        |         |     |           |     |     |
|-----------------------------------------|------------|---------------------|----------------------------------------------------------------------------------------|------|------------------------|---------|-----|-----------|-----|-----|
| Global                                  | 2005615499 | pfam00501           | Acyl-coenzyme A synthetases/AMP-(fatty) acid liga ses                                  | 277  |                        | COG0365 | I   |           | No  | No  |
| Pellet                                  | 2005568220 | pfam00501           | Acyl-coenzyme A synthetases/AMP-(fatty) acid liga ses                                  | 255  |                        | COG0365 | I   |           | No  | No  |
| Soluble                                 | 200560153  | pfam00501           | Acyl-coenzyme A synthetases/AMP-(fatty) acid liga ses                                  | 514  | EC:6.2.1.1             | COG0365 | I   |           | No  | No  |
| Soluble                                 | 2005571610 | pfam00501           | Acyl-coenzyme A synthetases/AMP-(fatty) acid liga ses                                  | 336  |                        | COG0365 | I   |           | No  | No  |
| Supernatant                             | 2005574362 | pfam00501           | Acyl-coenzyme A synthetases/AMP-(fatty) acid liga ses                                  | 528  | EC:6.2.1.1             | COG0365 | I   |           | No  | No  |
| Supernatant                             | 2005592363 | pfam00501           | Acyl-coenzyme A synthetases/AMP-(fatty) acid liga ses                                  | 201  |                        | COG0365 | I   |           | No  | No  |
| Soluble                                 | 2005607139 |                     | Adenine-specific DNA methylase                                                         | 249  |                        | COG4646 | L K |           | No  | No  |
| Insoluble                               | 2005620536 |                     | Adenine-specific DNA methylase containing a Zn-ri bbon                                 | 266  |                        | COG1743 | L   |           | No  | No  |
| Pellet                                  | 2005564662 | pfam00211 pfam00672 | Adenylate cyclase, family 3 (some proteins contai n HAMP domain)                       | 473  |                        | COG2114 | T   |           | No  | Yes |
| Pellet / Supernatant                    | 2005584510 | pfam00211 pfam07719 | Adenylate cyclase, family 3 (some proteins contai n HAMP domain)                       | 523  |                        | COG2114 | T   |           | Yes | Yes |
| Soluble                                 | 2005565023 | pfam00211           | Adenylate cyclase, family 3 (some proteins contai n HAMP domain)                       | 540  |                        | COG2114 | T   |           | Yes | Yes |
| Insoluble                               | 2005571109 | pfam00406           | Adenylate kinase and related kinases                                                   | 225  | EC:2.7.4.3             | COG0563 | F   | TIGR01351 | No  | No  |
| Pellet                                  | 2005569816 | pfam00406           | Adenylate kinase and related kinases                                                   | 195  | EC:2.7.4.3             | COG0563 | F   |           | Yes | No  |
| Pellet / Soluble / Supernatant          | 2005572866 | pfam00406 pfam05191 | Adenylate kinase and related kinases                                                   | 156  | EC:2.7.4.3             | COG0563 | F   |           | No  | No  |
| Pellet                                  | 2005564770 | pfam00206 pfam10397 | Adenylosuccinate lyase                                                                 | 478  | EC:4.3.2.2             | COG0015 | F   | TIGR00928 | No  | No  |
| Pellet                                  | 2005569083 | pfam00709           | Adenylosuccinate synthase                                                              | 307  |                        | COG0104 | F   | TIGR00184 | No  | No  |
| Pellet / Supernatant / Soluble          | 2005566426 | pfam00709           | Adenylosuccinate synthase                                                              | 313  |                        | COG0104 | F   | TIGR00184 | No  | No  |
| Soluble                                 | 2005566748 | pfam00709           | Adenylosuccinate synthase                                                              | 328  | EC:6.3.4.4             | COG0104 | F   | TIGR00184 | No  | No  |
| Soluble                                 | 2005603128 | pfam00709           | Adenylosuccinate synthase                                                              | 127  |                        | COG0104 | F   | TIGR00184 | No  | No  |
| Global                                  | 2005563943 | pfam00483           | ADP-glucose pyrophosphorylase                                                          | 424  | EC:2.7.7.27            | COG0448 | G   | TIGR02091 | No  | No  |
| Insoluble / Soluble                     | 2005585246 |                     | ADP-glucose pyrophosphorylase                                                          | 98   |                        | COG0448 | G   |           | No  | No  |
| Pellet / Supernatant                    | 2005568055 | pfam00483           | ADP-glucose pyrophosphorylase                                                          | 323  | EC:2.7.7.27            | COG0448 | G   | TIGR02091 | No  | No  |
| Soluble                                 | 2005563945 | pfam00483           | ADP-glucose pyrophosphorylase                                                          | 295  |                        | COG0448 | G   |           | Yes | No  |
| Soluble                                 | 2005576712 | pfam00483           | ADP-glucose pyrophosphorylase                                                          | 324  | EC:2.7.7.27            | COG0448 | G   |           | No  | No  |
| Soluble                                 | 2005621403 | pfam00483           | ADP-glucose pyrophosphorylase                                                          | 139  |                        | COG0448 | G   |           | No  | No  |
| Supernatant                             | 2005572816 | pfam00483           | ADP-glucose pyrophosphorylase                                                          | 206  |                        | COG0448 | G   |           | No  | No  |
| Supernatant                             | 2005607563 | pfam00483           | ADP-glucose pyrophosphorylase                                                          | 301  |                        | COG0448 | G   |           | No  | No  |
| Insoluble                               | 2005621021 | pfam03747           | ADP-ribosylglycohydrolase                                                              | 149  |                        | COG1397 | O   |           | Yes | No  |
| Pellet                                  | 2005611215 | pfam03747           | ADP-ribosylglycohydrolase                                                              | 259  |                        | COG1397 | O   |           | No  | No  |
| Pellet / Supernatant                    | 2005578096 | pfam00515 pfam07719 | Adventurous gliding motility protein U precursor                                       | 674  |                        |         |     |           | No  | No  |
| Global                                  | 2005563808 | pfam02738           | Aerobic-type carbon monoxide dehydrogenase, large subunit CoxL/CutL homologs           | 340  |                        | COG1529 | C   |           | No  | No  |
| Pellet / Soluble / Supernatant          | 2005581042 | pfam02738           | Aerobic-type carbon monoxide dehydrogenase, large subunit CoxL/CutL homologs           | 292  |                        | COG1529 | C   |           | No  | No  |
| Soluble                                 | 2005600166 | pfam02738           | Aerobic-type carbon monoxide dehydrogenase, large subunit CoxL/CutL homologs           | 255  |                        | COG1529 | C   |           | No  | No  |
| Soluble                                 | 2005616054 | pfam01315 pfam02738 | Aerobic-type carbon monoxide dehydrogenase, large subunit CoxL/CutL homologs           | 271  |                        | COG1529 | C   |           | Yes | No  |
| Supernatant                             | 2005580893 | pfam01315 pfam02738 | Aerobic-type carbon monoxide dehydrogenase, large subunit CoxL/CutL homologs           | 430  |                        | COG1529 | C   |           | No  | No  |
| Global / Pellet / Soluble / Supernatant | 2005570251 | pfam01808           | AICAR transformylase/IMP cyclohydrolase PurH (onl y IMP cyclohydrolase domain in AfuI) | 210  |                        | COG0138 | F   |           | No  | No  |
| Pellet                                  | 2005564573 | pfam01808 pfam02142 | AICAR transformylase/IMP cyclohydrolase PurH (onl y IMP cyclohydrolase domain in AfuI) | 434  | EC:2.1.2.3             | COG0138 | F   |           | No  | No  |
| Pellet / Supernatant                    | 2005580556 | pfam01808 pfam02142 | AICAR transformylase/IMP cyclohydrolase PurH (onl y IMP cyclohydrolase domain in AfuI) | 548  | EC:2.1.2.3             | COG0138 | F   | TIGR00355 | No  | No  |
| Soluble                                 | 2005595036 | pfam01808           | AICAR transformylase/IMP cyclohydrolase PurH (onl y IMP cyclohydrolase domain in AfuI) | 235  |                        | COG0138 | F   |           | No  | No  |
| Soluble                                 | 2005618876 | pfam01808 pfam02142 | AICAR transformylase/IMP cyclohydrolase PurH (onl y IMP cyclohydrolase domain in AfuI) | 261  |                        | COG0138 | F   |           | No  | No  |
| Soluble                                 | 2005621724 |                     | AICAR transformylase/IMP cyclohydrolase PurH (onl y IMP cyclohydrolase domain in AfuI) | 101  |                        | COG0138 | F   |           | Yes | No  |
| Supernatant                             | 2005567890 | pfam01808 pfam02142 | AICAR transformylase/IMP cyclohydrolase PurH (onl y IMP cyclohydrolase domain in AfuI) | 275  |                        | COG0138 | F   |           | No  | No  |
| Supernatant                             | 2005567891 | pfam01808           | AICAR transformylase/IMP cyclohydrolase PurH (onl y IMP cyclohydrolase domain in AfuI) | 325  |                        | COG0138 | F   |           | No  | No  |
| Global                                  | 2005569547 | pfam01262 pfam05222 | Alanine dehydrogenase                                                                  | 286  | EC:1.4.1.1             | COG0686 | E   | TIGR00518 | No  | No  |
| Pellet / Soluble / Supernatant          | 2005573731 | pfam01262 pfam05222 | Alanine dehydrogenase                                                                  | 286  | EC:1.4.1.1             | COG0686 | E   | TIGR00518 | No  | No  |
| Soluble                                 | 2005597645 | pfam01262           | Alanine dehydrogenase                                                                  | 200  |                        | COG0686 | E   |           | No  | No  |
| Supernatant                             | 2005597916 | pfam01262 pfam05222 | Alanine dehydrogenase                                                                  | 226  |                        | COG0686 | E   |           | No  | No  |
| Global / Supernatant                    | 2005585136 | pfam01411           | Alanyl-tRNA synthetase                                                                 | 522  | EC:6.1.1.7             | COG0013 | J   | TIGR00344 | No  | No  |
| Pellet                                  | 2005563657 | pfam01411           | Alanyl-tRNA synthetase                                                                 | 554  | EC:6.1.1.7             | COG0013 | J   | TIGR00344 | No  | No  |
| Pellet                                  | 2005562667 | pfam00465           | Alcohol dehydrogenase, class IV                                                        | 375  | EC:1.1.1.202           | COG1454 | C   |           | No  | No  |
| Pellet                                  | 2005597357 | pfam00465           | Alcohol dehydrogenase, class IV                                                        | 242  |                        | COG1454 | C   |           | No  | No  |
| Pellet / Supernatant / Global           | 2005566810 | pfam00465           | Alcohol dehydrogenase, class IV                                                        | 507  | EC:1.1.1.1             | COG1454 | C   |           | No  | No  |
| Soluble / Global                        | 2005565070 | pfam00465           | Alcohol dehydrogenase, class IV                                                        | 803  | EC:1.1.1.1 EC:1.2.1.10 | COG1454 | C   |           | No  | No  |
| Supernatant                             | 2005562032 | pfam00465           | Alcohol dehydrogenase, class IV                                                        | 713  | EC:1.1.1.1 EC:1.2.1.10 | COG1454 | C   |           | No  | No  |
| Supernatant                             | 2005571069 | pfam00465           | Alcohol dehydrogenase, class IV                                                        | 783  | EC:1.1.1.1 EC:1.2.1.10 | COG1454 | C   |           | No  | No  |
| Soluble                                 | 2005607112 | pfam01314 pfam02730 | Aldehyde                                                                               | 256  |                        | COG2414 | C   |           | No  | No  |
| Pellet                                  | 2005561539 | pfam00245           | Alkaline phosphatase                                                                   | 230  |                        | COG1785 | P   |           | Yes | No  |
| Pellet                                  | 2005573967 | pfam00245           | Alkaline phosphatase                                                                   | 422  | EC:3.1.3.1             | COG1785 | P   |           | Yes | No  |
| Global                                  | 2005587064 | pfam00561           | Alpha/beta hydrolase superfamily                                                       | 282  |                        | COG0596 | R   |           | No  | No  |
| Pellet                                  | 2005568694 | pfam00128           | Alpha-amylase family protein                                                           | 749  |                        | COG0366 | G   |           | Yes | No  |
| Pellet                                  | 2005576576 | pfam00128           | Alpha-amylase family protein                                                           | 1029 |                        | COG0366 | G   |           | No  | No  |
| Pellet / Supernatant                    | 2005563255 | pfam00128           | Alpha-amylase family protein                                                           | 817  |                        | COG0366 | G   |           | No  | No  |
| Soluble                                 | 2005617570 |                     | Alpha-amylase/alpha-mannosidase                                                        | 277  |                        |         |     |           | No  | No  |
| Soluble                                 | 2005572223 | pfam02056           | Alpha-galactosidases/6-phospho-beta-glucosidases, family 4 of glycosyl hydrolases      | 440  | EC:3.2.1.22            | COG1486 | G   |           | Yes | No  |
| Pellet                                  | 2005584142 |                     | Alpha-L-arabinofuranosidase                                                            | 354  |                        | COG3534 | G   |           | No  | No  |
| Supernatant                             | 2005565132 | pfam03425           | Alpha-L-arabinofuranosidase                                                            | 687  |                        | COG3534 | G   |           | No  | No  |
| Global                                  | 2005629843 |                     | Alpha-tubulin suppressor and related RCC1 domain- containing proteins                  | 285  |                        | COG5184 | Z D |           | No  | No  |
| Pellet                                  | 2005579984 |                     | Alpha-tubulin suppressor and related RCC1 domain- containing proteins                  | 435  |                        | COG5184 | D Z |           | No  | No  |
| Pellet                                  | 2005615736 | pfam00415           | Alpha-tubulin suppressor and related RCC1 domain- containing proteins                  | 253  |                        | COG5184 | Z D |           | Yes | Yes |
| Global / Pellet                         | 2005585913 | pfam00543 pfam00909 | Ammonia permease                                                                       | 550  |                        | COG0004 | P   | TIGR00836 | Yes | Yes |
| Insoluble / Pellet / Supernatant        | 2005593254 | pfam00543 pfam00909 | Ammonia permease                                                                       | 376  |                        | COG0004 | P   |           | Yes | Yes |
| Pellet                                  | 2005564587 | pfam00543 pfam00909 | Ammonia permease                                                                       | 307  |                        | COG0004 | P   |           | No  | Yes |
| Pellet                                  | 2005611987 | pfam00909           | Ammonia permease                                                                       | 281  |                        | COG0004 | P   | TIGR00836 | Yes | Yes |
| Supernatant                             | 2005574431 | pfam00543 pfam00909 | Ammonia permease                                                                       | 305  |                        | COG0004 | P   |           | No  | Yes |
| Supernatant                             | 2005579402 | pfam00543 pfam00909 | Ammonia permease                                                                       | 446  |                        | COG0004 | P   | TIGR00836 | Yes | Yes |
| Pellet                                  | 2005628681 | pfam00384           | Anaerobic dehydrogenases, typically selenocystein e-containing                         | 64   |                        | COG3383 | R   |           | No  | No  |
| Pellet                                  | 2005590758 |                     | annotation not available                                                               | 227  |                        |         |     |           | No  | No  |
| Soluble                                 | 2005560196 | pfam00425 pfam04715 | Anthranilate/para-aminobenzoate synthases compone nt I                                 | 355  |                        | COG0147 | E H |           | No  | No  |
| Supernatant / Soluble                   | 2005562900 | pfam00425 pfam04715 | Anthranilate/para-aminobenzoate synthases compone nt I                                 | 493  | EC:4.1.3.27            | COG0147 | H E | TIGR00564 | No  | No  |
| Supernatant                             | 2005615250 | pfam01740           | Anti-anti-sigma regulatory factor (antagonist of anti-sigma factor)                    | 94   |                        | COG1366 | T   | TIGR00377 | No  | No  |
| Pellet / Soluble                        | 2005574221 | pfam05262           | Antigen, P83/100                                                                       | 301  |                        |         |     |           | No  | No  |
| Supernatant / Soluble                   | 2005562223 | pfam05262           | Antigen, P83/100                                                                       | 288  |                        |         |     |           | No  | No  |
| Pellet                                  | 2005591888 | pfam05262           | Antigen, putative                                                                      | 192  |                        |         |     |           | Yes | Yes |
| Soluble                                 | 2005574725 | pfam05262           | Antigen, putative                                                                      | 299  |                        |         |     |           | Yes | Yes |
| Soluble                                 | 2005608526 | pfam05262           | Antigen, putative                                                                      | 247  |                        |         |     |           | No  | No  |
| Soluble                                 | 2005567654 | pfam00795           | Apolipoprotein N-acyltransferase                                                       | 464  | EC:2.3.1.-             | COG0815 | M   | TIGR00546 | Yes | Yes |
| Soluble                                 | 2005586274 |                     | Apolipoprotein N-acyltransferase                                                       | 433  |                        | COG0815 | M   | TIGR00546 | Yes | Yes |

|                                         |            |                               |                                                                      |     |             |         |   |                     |     |     |
|-----------------------------------------|------------|-------------------------------|----------------------------------------------------------------------|-----|-------------|---------|---|---------------------|-----|-----|
| Global                                  | 2005562312 | pfam00006                     | Archaeal/vacuolar-type H <sup>+</sup> -ATPase subunit A              | 382 |             | COG1155 | C |                     | No  | No  |
| Global                                  | 2005587865 | pfam00006 pfam02874           | Archaeal/vacuolar-type H <sup>+</sup> -ATPase subunit A              | 589 | EC:3.6.3.14 | COG1155 | C |                     | No  | No  |
| Global                                  | 2005591211 | pfam00006 pfam02874           | Archaeal/vacuolar-type H <sup>+</sup> -ATPase subunit A              | 294 |             | COG1155 | C |                     | No  | No  |
| Global / Pellet                         | 2005568029 | pfam02874                     | Archaeal/vacuolar-type H <sup>+</sup> -ATPase subunit A              | 132 |             | COG1155 | C |                     | No  | No  |
| Global / Supernatant                    | 2005585163 | pfam00006 pfam02874           | Archaeal/vacuolar-type H <sup>+</sup> -ATPase subunit A              | 561 | EC:3.6.3.14 | COG1155 | C |                     | No  | No  |
| Insoluble                               | 200560545  |                               | Archaeal/vacuolar-type H <sup>+</sup> -ATPase subunit A              | 174 |             | COG1155 | C |                     | No  | No  |
| Pellet                                  | 2005573960 | pfam00006 pfam02874           | Archaeal/vacuolar-type H <sup>+</sup> -ATPase subunit A              | 306 |             | COG1155 | C |                     | No  | No  |
| Pellet                                  | 2005574772 | pfam00006 pfam02874           | Archaeal/vacuolar-type H <sup>+</sup> -ATPase subunit A              | 486 | EC:3.6.3.14 | COG1155 | C |                     | No  | No  |
| Pellet                                  | 2005580242 | pfam00006                     | Archaeal/vacuolar-type H <sup>+</sup> -ATPase subunit A              | 231 |             | COG1155 | C |                     | No  | No  |
| Pellet                                  | 2005587429 | pfam00006                     | Archaeal/vacuolar-type H <sup>+</sup> -ATPase subunit A              | 350 |             | COG1155 | C |                     | No  | No  |
| Pellet                                  | 2005591410 | pfam02874                     | Archaeal/vacuolar-type H <sup>+</sup> -ATPase subunit A              | 142 |             | COG1155 | C |                     | No  | No  |
| Pellet                                  | 2005611004 | pfam00006 pfam02874           | Archaeal/vacuolar-type H <sup>+</sup> -ATPase subunit A              | 287 |             | COG1155 | C |                     | No  | No  |
| Pellet / Supernatant                    | 2005573133 | pfam02874                     | Archaeal/vacuolar-type H <sup>+</sup> -ATPase subunit A              | 142 |             | COG1155 | C |                     | No  | No  |
| Soluble                                 | 2005566786 | pfam00006 pfam00306 pfam02874 | Archaeal/vacuolar-type H <sup>+</sup> -ATPase subunit A              | 600 | EC:3.6.3.14 | COG1155 | C |                     | No  | No  |
| Soluble                                 | 2005568030 | pfam00006                     | Archaeal/vacuolar-type H <sup>+</sup> -ATPase subunit A              | 448 | EC:3.6.3.14 | COG1155 | C |                     | No  | No  |
| Soluble                                 | 2005573132 | pfam00006                     | Archaeal/vacuolar-type H <sup>+</sup> -ATPase subunit A              | 342 |             | COG1155 | C |                     | No  | No  |
| Soluble                                 | 2005574380 | pfam00006 pfam02874           | Archaeal/vacuolar-type H <sup>+</sup> -ATPase subunit A              | 592 | EC:3.6.3.14 | COG1155 | C |                     | No  | No  |
| Soluble                                 | 2005582823 | pfam00006 pfam02874           | Archaeal/vacuolar-type H <sup>+</sup> -ATPase subunit A              | 586 | EC:3.6.3.14 | COG1155 | C |                     | No  | No  |
| Soluble                                 | 2005610913 |                               | Archaeal/vacuolar-type H <sup>+</sup> -ATPase subunit A              | 120 |             | COG1155 | C |                     | No  | No  |
| Supernatant                             | 2005568320 | pfam00006 pfam02874           | Archaeal/vacuolar-type H <sup>+</sup> -ATPase subunit A              | 441 |             | COG1155 | C |                     | No  | No  |
| Supernatant                             | 2005571183 |                               | Archaeal/vacuolar-type H <sup>+</sup> -ATPase subunit A              | 121 |             | COG1155 | C |                     | No  | No  |
| Supernatant                             | 2005571256 | pfam00006                     | Archaeal/vacuolar-type H <sup>+</sup> -ATPase subunit A              | 468 | EC:3.6.3.14 | COG1155 | C |                     | No  | No  |
| Supernatant                             | 2005613816 | pfam00006                     | Archaeal/vacuolar-type H <sup>+</sup> -ATPase subunit A              | 274 |             | COG1155 | C |                     | No  | No  |
| Global                                  | 2005571257 | pfam00006 pfam02874           | Archaeal/vacuolar-type H <sup>+</sup> -ATPase subunit B              | 377 | EC:3.6.3.14 | COG1156 | C |                     | No  | No  |
| Global                                  | 2005573750 | pfam00006 pfam02874           | Archaeal/vacuolar-type H <sup>+</sup> -ATPase subunit B              | 201 |             | COG1156 | C |                     | No  | No  |
| Global / Insoluble                      | 2005583604 | pfam00006 pfam02874           | Archaeal/vacuolar-type H <sup>+</sup> -ATPase subunit B              | 390 | EC:3.6.3.15 | COG1156 | C |                     | No  | No  |
| Global / Pellet / Soluble / Supernatant | 2005574379 | pfam00006 pfam02874           | Archaeal/vacuolar-type H <sup>+</sup> -ATPase subunit B              | 345 | EC:3.6.3.14 | COG1156 | C |                     | No  | No  |
| Global / Pellet / Supernatant           | 2005574285 | pfam00006                     | Archaeal/vacuolar-type H <sup>+</sup> -ATPase subunit B              | 236 |             | COG1156 | C |                     | No  | No  |
| Global / Soluble                        | 2005580241 | pfam00006 pfam02874           | Archaeal/vacuolar-type H <sup>+</sup> -ATPase subunit B              | 237 |             | COG1156 | C |                     | No  | No  |
| Insoluble                               | 2005570309 | pfam00006 pfam02874           | Archaeal/vacuolar-type H <sup>+</sup> -ATPase subunit B              | 423 | EC:3.6.3.14 | COG1156 | C |                     | No  | No  |
| Pellet                                  | 2005560977 | pfam00006 pfam00306 pfam02874 | Archaeal/vacuolar-type H <sup>+</sup> -ATPase subunit B              | 435 | EC:3.6.3.14 | COG1156 | C | TIGR00309           | No  | No  |
| Pellet                                  | 2005563297 | pfam00006 pfam09378           | Archaeal/vacuolar-type H <sup>+</sup> -ATPase subunit B              | 403 | EC:3.6.3.14 | COG1156 | C |                     | No  | No  |
| Pellet                                  | 2005580239 | pfam00006 pfam02874           | Archaeal/vacuolar-type H <sup>+</sup> -ATPase subunit B              | 432 | EC:3.6.3.14 | COG1156 | C |                     | No  | No  |
| Pellet                                  | 2005585162 | pfam00006 pfam02874           | Archaeal/vacuolar-type H <sup>+</sup> -ATPase subunit B              | 432 | EC:3.6.3.14 | COG1156 | C |                     | No  | No  |
| Pellet / Soluble                        | 2005561837 | pfam00006 pfam02874           | Archaeal/vacuolar-type H <sup>+</sup> -ATPase subunit B              | 416 | EC:3.6.3.14 | COG1156 | C |                     | No  | No  |
| Pellet / Supernatant / Soluble / Global | 2005562311 | pfam02874                     | Archaeal/vacuolar-type H <sup>+</sup> -ATPase subunit B              | 134 |             | COG1156 | C |                     | No  | No  |
| Soluble / Supernatant                   | 2005583606 | pfam00006 pfam02874           | Archaeal/vacuolar-type H <sup>+</sup> -ATPase subunit B              | 441 | EC:3.6.3.15 | COG1156 | C |                     | No  | No  |
| Pellet                                  | 2005560543 | pfam01813                     | Archaeal/vacuolar-type H <sup>+</sup> -ATPase subunit D              | 201 | EC:3.6.3.14 | COG1394 | C | TIGR00309           | No  | No  |
| Pellet                                  | 2005573751 | pfam01813                     | Archaeal/vacuolar-type H <sup>+</sup> -ATPase subunit D              | 200 | EC:3.6.3.14 | COG1394 | C | TIGR00309           | No  | No  |
| Pellet                                  | 2005631722 | pfam01813                     | Archaeal/vacuolar-type H <sup>+</sup> -ATPase subunit D              | 186 | EC:3.6.3.14 | COG1394 | C | TIGR00309           | No  | No  |
| Global / Pellet                         | 2005588619 |                               | Archaeal/vacuolar-type H <sup>+</sup> -ATPase subunit E              | 169 | EC:3.6.3.14 |         |   |                     | No  | No  |
| Global / Pellet                         | 2005607393 |                               | Archaeal/vacuolar-type H <sup>+</sup> -ATPase subunit E              | 173 |             |         |   |                     | No  | No  |
| Global / Soluble / Supernatant          | 2005574774 |                               | Archaeal/vacuolar-type H <sup>+</sup> -ATPase subunit E              | 187 |             |         |   |                     | No  | No  |
| Pellet                                  | 2005586946 |                               | Archaeal/vacuolar-type H <sup>+</sup> -ATPase subunit E              | 204 | EC:3.6.3.14 |         |   |                     | No  | No  |
| Soluble                                 | 2005577269 |                               | Archaeal/vacuolar-type H <sup>+</sup> -ATPase subunit E              | 165 | EC:3.6.3.14 |         |   |                     | No  | No  |
| Soluble                                 | 2005592809 |                               | Archaeal/vacuolar-type H <sup>+</sup> -ATPase subunit E              | 196 | EC:3.6.3.14 | COG1390 | C |                     | No  | No  |
| Soluble / Global                        | 2005628180 |                               | Archaeal/vacuolar-type H <sup>+</sup> -ATPase subunit E              | 169 |             |         |   |                     | No  | No  |
| Supernatant                             | 2005561834 |                               | Archaeal/vacuolar-type H <sup>+</sup> -ATPase subunit E              | 186 | EC:3.6.3.14 | COG1390 | C |                     | No  | No  |
| Pellet                                  | 2005563934 |                               | Archaeal/vacuolar-type H <sup>+</sup> -ATPase subunit I              | 348 |             | COG1269 | C |                     | No  | No  |
| Pellet                                  | 2005572467 |                               | Archaeal/vacuolar-type H <sup>+</sup> -ATPase subunit I              | 316 |             | COG1269 | C |                     | No  | No  |
| Pellet                                  | 2005612194 |                               | Archaeal/vacuolar-type H <sup>+</sup> -ATPase subunit I              | 281 |             | COG1269 | C |                     | No  | No  |
| Supernatant                             | 2005576344 | pfam00206                     | Argininosuccinate lyase                                              | 458 | EC:4.3.2.1  | COG0165 | E | TIGR00838           | No  | No  |
| Pellet                                  | 2005572279 | pfam00764                     | Argininosuccinate synthase                                           | 420 | EC:6.3.4.5  | COG0137 | E | TIGR00032           | No  | No  |
| Pellet                                  | 2005588733 | pfam00764                     | Argininosuccinate synthase                                           | 252 |             | COG0137 | E | TIGR00032           | No  | No  |
| Pellet / Supernatant                    | 2005563150 | pfam00764                     | Argininosuccinate synthase                                           | 370 | EC:6.3.4.5  | COG0137 | E | TIGR00032           | No  | No  |
| Supernatant / Insoluble / Soluble       | 2005561472 | pfam00764                     | Argininosuccinate synthase                                           | 405 | EC:6.3.4.5  | COG0137 | E | TIGR00032           | No  | No  |
| Pellet                                  | 2005567676 | pfam00185 pfam02729           | Aspartate carbamoyltransferase, catalytic chain                      | 308 | EC:2.1.3.2  | COG0540 | F | TIGR00670           | No  | No  |
| Pellet                                  | 2005583567 | pfam00155                     | Aspartate/tyrosine/aromatic aminotransferase                         | 122 |             | COG0436 | E |                     | No  | No  |
| Pellet                                  | 2005585739 | pfam00155                     | Aspartate/tyrosine/aromatic aminotransferase                         | 398 | EC:2.6.1.1  | COG0436 | E |                     | No  | No  |
| Pellet                                  | 2005593613 | pfam00155                     | Aspartate/tyrosine/aromatic aminotransferase                         | 411 | EC:2.6.1.1  | COG0436 | E |                     | No  | Yes |
| Pellet                                  | 2005608974 | pfam00155                     | Aspartate/tyrosine/aromatic aminotransferase                         | 265 |             | COG0436 | E |                     | No  | No  |
| Pellet                                  | 2005613867 | pfam00155                     | Aspartate/tyrosine/aromatic aminotransferase                         | 287 |             | COG0436 | E |                     | No  | No  |
| Pellet / Soluble                        | 2005576315 | pfam00155                     | Aspartate/tyrosine/aromatic aminotransferase                         | 405 | EC:2.6.1.1  | COG0436 | E |                     | No  | No  |
| Soluble                                 | 2005568002 | pfam00155                     | Aspartate/tyrosine/aromatic aminotransferase                         | 444 | EC:2.6.1.1  | COG0436 | E |                     | No  | No  |
| Soluble                                 | 2005600039 | pfam00155                     | Aspartate/tyrosine/aromatic aminotransferase                         | 280 |             | COG0436 | E |                     | No  | No  |
| Soluble                                 | 2005614673 |                               | Aspartate/tyrosine/aromatic aminotransferase                         | 151 |             | COG0436 | E |                     | No  | No  |
| Supernatant                             | 2005568021 | pfam00155                     | Aspartate/tyrosine/aromatic aminotransferase                         | 388 | EC:2.6.1.-  | COG0436 | E |                     | No  | No  |
| Supernatant                             | 2005595851 | pfam00155                     | Aspartate/tyrosine/aromatic aminotransferase                         | 200 |             | COG0436 | E |                     | Yes | No  |
| Global                                  | 2005560746 | pfam02774                     | Aspartate-semialdehyde dehydrogenase                                 | 220 |             | COG0136 | E |                     | No  | No  |
| Pellet                                  | 2005566580 | pfam02774                     | Aspartate-semialdehyde dehydrogenase                                 | 95  |             | COG0136 | E |                     | No  | No  |
| Pellet                                  | 2005585961 | pfam01118 pfam02774           | Aspartate-semialdehyde dehydrogenase                                 | 288 | EC:1.2.1.11 | COG0136 | E | TIGR01296           | No  | No  |
| Pellet                                  | 2005604913 | pfam02774                     | Aspartate-semialdehyde dehydrogenase                                 | 178 |             | COG0136 | E |                     | No  | No  |
| Pellet / Supernatant                    | 2005576396 | pfam02774                     | Aspartate-semialdehyde dehydrogenase                                 | 182 |             | COG0136 | E |                     | No  | No  |
| Pellet / Supernatant                    | 2005578749 | pfam02774                     | Aspartate-semialdehyde dehydrogenase                                 | 223 |             | COG0136 | E |                     | No  | No  |
| Soluble                                 | 2005577888 | pfam01118 pfam02774           | Aspartate-semialdehyde dehydrogenase                                 | 300 | EC:1.2.1.11 | COG0136 | E | TIGR00978           | No  | No  |
| Pellet                                  | 2005572590 | pfam00696 pfam01842           | Aspartokinases                                                       | 450 |             | COG0527 | E | TIGR00656 TIGR00657 | No  | No  |
| Pellet                                  | 2005579689 | pfam00696                     | Aspartokinases                                                       | 310 |             | COG0527 | E | TIGR00657           | No  | No  |
| Pellet                                  | 2005573844 | pfam02127                     | Aspartyl aminopeptidase                                              | 383 | EC:3.4.11.- | COG1362 | E |                     | No  | No  |
| Pellet                                  | 2005584396 | pfam00152                     | Aspartyl-tRNA synthetase                                             | 291 |             | COG0173 | J |                     | No  | No  |
| Pellet                                  | 2005603637 | pfam00152                     | Aspartyl-tRNA synthetase                                             | 112 |             | COG0173 | J |                     | No  | No  |
| Pellet / Soluble                        | 2005563625 | pfam00152                     | Aspartyl-tRNA synthetase                                             | 251 |             | COG0173 | J |                     | No  | No  |
| Soluble                                 | 2005564562 | pfam00152 pfam01336           | Aspartyl-tRNA synthetase                                             | 592 | EC:6.1.1.12 | COG0173 | J | TIGR00459           | No  | No  |
| Soluble                                 | 2005575085 | pfam00152 pfam01336           | Aspartyl-tRNA synthetase                                             | 590 | EC:6.1.1.12 | COG0173 | J | TIGR00459           | No  | No  |
| Pellet / Soluble                        | 2005595233 | pfam01634 pfam08029           | ATP phosphoribosyltransferase                                        | 285 | EC:2.4.2.17 | COG0040 | E | TIGR00070 TIGR03455 | No  | No  |
| Soluble                                 | 2005560320 | pfam01634 pfam08029           | ATP phosphoribosyltransferase                                        | 149 |             | COG0040 | E | TIGR03455           | No  | No  |
| Soluble                                 | 2005618251 | pfam01634 pfam08029           | ATP phosphoribosyltransferase                                        | 269 | EC:2.4.2.17 | COG0040 | E | TIGR00070 TIGR03455 | No  | No  |
| Pellet / Supernatant                    | 2005588000 | pfam00005                     | ATPase components of ABC transporters with duplicated ATPase domains | 102 |             | COG0488 | R |                     | No  | No  |

|                                  |            |                                                             |                                                                                                            |      |              |         |     |                     |     |     |
|----------------------------------|------------|-------------------------------------------------------------|------------------------------------------------------------------------------------------------------------|------|--------------|---------|-----|---------------------|-----|-----|
| Supernatant                      | 2005560049 | pfam00005                                                   | ATPase components of ABC transporters with duplicated ATPase domains                                       | 287  |              | COG0488 | R   |                     | No  | No  |
| Supernatant                      | 2005569333 |                                                             | ATPase components of ABC transporters with duplicated ATPase domains                                       | 186  |              | COG0488 | R   |                     | No  | No  |
| Pellet                           | 2005561103 | pfam00005                                                   | ATPase components of various ABC-type transport systems, contain duplicated ATPase                         | 200  |              | COG4608 | E   |                     | No  | No  |
| Pellet                           | 2005630457 |                                                             | ATPase involved in DNA repair                                                                              | 238  |              | COG0497 | L   |                     | Yes | No  |
| Pellet                           | 2005610018 | pfam00308                                                   | ATPase involved in DNA replication initiation                                                              | 258  |              | COG0593 | L   |                     | No  | No  |
| Global                           | 2005590581 | pfam00004                                                   | ATPase related to the helicase subunit of the Holliday junction resolvase                                  | 384  | EC:2.7.7.7   | COG2256 | L   |                     | No  | No  |
| Global                           | 2005615782 |                                                             | ATPase related to the helicase subunit of the Holliday junction resolvase                                  | 284  |              | COG2256 | L   |                     | No  | No  |
| Global                           | 2005629298 |                                                             | ATPases involved in chromosome partitioning                                                                | 286  |              | COG0455 | D   |                     | No  | No  |
| Pellet                           | 2005563976 |                                                             | ATPases involved in chromosome partitioning                                                                | 359  |              | COG0455 | D   |                     | No  | Yes |
| Pellet                           | 2005584359 | pfam01656                                                   | ATPases involved in chromosome partitioning                                                                | 320  |              | COG0455 | D   |                     | No  | No  |
| Pellet                           | 2005570027 | pfam00004                                                   | ATPases of the AAA+ class                                                                                  | 310  |              | COG0464 | O   |                     | No  | No  |
| Soluble                          | 2005597458 | pfam00004                                                   | ATPases of the AAA+ class                                                                                  | 258  |              | COG0464 | O   |                     | No  | No  |
| Global                           | 2005586903 | pfam00004 pfam02861                                         | ATPases with chaperone activity, ATP-binding subunit                                                       | 315  |              | COG0542 | O   |                     | No  | No  |
| Global                           | 2005592943 | pfam00004 pfam07724 pfam10431                               | ATPases with chaperone activity, ATP-binding subunit                                                       | 872  |              | COG0542 | O   | TIGR03346           | No  | No  |
| Pellet                           | 2005573530 | pfam00004 pfam02151 pfam02861 pfam07724 pfam10431           | ATPases with chaperone activity, ATP-binding subunit                                                       | 760  | EC:3.4.21.-  | COG0542 | O   |                     | No  | No  |
| Pellet                           | 2005574014 | pfam07724 pfam10431                                         | ATPases with chaperone activity, ATP-binding subunit                                                       | 602  |              | COG0542 | O   |                     | No  | No  |
| Pellet                           | 2005574373 | pfam00004 pfam02861                                         | ATPases with chaperone activity, ATP-binding subunit                                                       | 355  |              | COG0542 | O   |                     | No  | No  |
| Supernatant                      | 2005602800 | pfam00004 pfam02151                                         | ATPases with chaperone activity, ATP-binding subunit                                                       | 259  |              | COG0542 | O   |                     | No  | No  |
| Soluble                          | 2005630637 |                                                             | ATP-dependent exonuclease (exonuclease V) beta subunit (contains helicase and exonuclease domains)         | 150  |              | COG1074 | L   |                     | No  | No  |
| Pellet                           | 2005625661 |                                                             | ATP-dependent helicase II                                                                                  | 278  |              |         |     |                     | No  | No  |
| Global                           | 2005578790 | pfam00004 pfam02190 pfam05362                               | ATP-dependent Lon protease, bacterial type                                                                 | 837  | EC:3.4.21.53 | COG0466 | O   | TIGR00763           | No  | No  |
| Pellet                           | 2005586346 | pfam00004 pfam05362                                         | ATP-dependent Lon protease, bacterial type                                                                 | 535  |              | COG0466 | O   | TIGR00763           | No  | No  |
| Pellet                           | 2005565994 | pfam06689 pfam07724 pfam10431                               | ATP-dependent protease Clp, ATPase subunit                                                                 | 412  | EC:3.4.21.92 | COG1219 | O   | TIGR00382           | No  | No  |
| Pellet                           | 2005586924 | pfam07724 pfam10431                                         | ATP-dependent protease Clp, ATPase subunit                                                                 | 282  |              | COG1219 | O   | TIGR00382           | Yes | No  |
| Supernatant / Insoluble          | 2005560314 | pfam06689 pfam07724 pfam10431                               | ATP-dependent protease Clp, ATPase subunit                                                                 | 417  | EC:3.4.21.92 | COG1219 | O   | TIGR00382           | No  | No  |
| Global / Insoluble / Supernatant | 2005580749 | pfam07724 pfam10431                                         | ATP-dependent protease HslVU (ClpYQ), ATPase subunit                                                       | 411  |              | COG1220 | O   | TIGR00390           | No  | No  |
| Pellet                           | 2005574140 | pfam07724                                                   | ATP-dependent protease HslVU (ClpYQ), ATPase subunit                                                       | 177  |              | COG1220 | O   | TIGR00390           | No  | No  |
| Pellet                           | 2005588062 | pfam07724                                                   | ATP-dependent protease HslVU (ClpYQ), ATPase subunit                                                       | 260  |              | COG1220 | O   |                     | No  | No  |
| Pellet                           | 2005593855 | pfam07724                                                   | ATP-dependent protease HslVU (ClpYQ), ATPase subunit                                                       | 395  |              | COG1220 | O   | TIGR00390           | No  | No  |
| Pellet                           | 2005560927 | pfam00004 pfam01434 pfam06480                               | ATP-dependent Zn proteases                                                                                 | 554  | EC:3.4.24.-  | COG0465 | O   | TIGR01241           | No  | Yes |
| Pellet                           | 2005571464 | pfam00004 pfam01434 pfam06480                               | ATP-dependent Zn proteases                                                                                 | 457  |              | COG0465 | O   | TIGR01241           | No  | Yes |
| Pellet / Supernatant             | 2005570436 | pfam00004 pfam01434                                         | ATP-dependent Zn proteases                                                                                 | 346  |              | COG0465 | O   | TIGR01241           | No  | No  |
| Supernatant                      | 2005612794 | pfam00004 pfam01434                                         | ATP-dependent Zn proteases                                                                                 | 286  |              | COG0465 | O   | TIGR01241           | No  | No  |
| Pellet                           | 2005617076 | pfam00216                                                   | Bacterial nucleoid DNA-binding protein                                                                     | 107  |              | COG0776 | L   |                     | No  | No  |
| Global                           | 2005620707 | pfam02368 pfam09471                                         | Bacterial surface proteins containing Ig-like domains                                                      | 266  |              | COG5492 | N   |                     | Yes | No  |
| Pellet                           | 2005586526 | pfam02368                                                   | Bacterial surface proteins containing Ig-like domains                                                      | 302  |              | COG5492 | N   |                     | Yes | Yes |
| Pellet                           | 2005628594 | pfam02368                                                   | Bacterial surface proteins containing Ig-like domains                                                      | 284  |              | COG5492 | N   |                     | No  | No  |
| Pellet                           | 2005596971 |                                                             | BatD, conserved hypothetical protein                                                                       | 267  |              |         |     |                     | No  | Yes |
| Soluble                          | 2005582945 | pfam00331                                                   | Beta-1,4-xylanase                                                                                          | 389  |              | COG3693 | G   |                     | No  | No  |
| Soluble                          | 2005625401 | pfam00232                                                   | Beta-glucosidase/6-phospho-beta-glucosidase/beta-galactosidase                                             | 93   |              | COG2723 | G   |                     | No  | No  |
| Pellet                           | 2005582010 | pfam00933 pfam01915                                         | Beta-glucosidase-related glycosidases                                                                      | 669  | EC:3.2.1.21  | COG1472 | G   |                     | Yes | No  |
| Soluble                          | 2005567174 | pfam00933                                                   | Beta-glucosidase-related glycosidases                                                                      | 244  |              | COG1472 | G   |                     | No  | No  |
| Soluble / Supernatant            | 2005584512 | pfam00933 pfam01915                                         | Beta-glucosidase-related glycosidases                                                                      | 427  |              | COG1472 | G   |                     | No  | No  |
| Global                           | 2005589623 | pfam04616                                                   | Beta-xylosidase                                                                                            | 529  | EC:3.2.1.55  | COG3507 | G   |                     | No  | No  |
| Global                           | 2005618691 | pfam01618                                                   | Biopolymer transport proteins                                                                              | 187  |              | COG0811 | U   |                     | Yes | Yes |
| Pellet                           | 2005603800 | pfam01618                                                   | Biopolymer transport proteins                                                                              | 178  |              | COG0811 | U   |                     | Yes | Yes |
| Pellet                           | 2005611290 | pfam00364 pfam02436                                         | Biotin carboxyl carrier protein                                                                            | 283  |              | COG1038 | C   |                     | No  | No  |
| Pellet                           | 2005589036 | pfam02785                                                   | Biotin carboxylase                                                                                         | 204  |              | COG4770 | I   |                     | No  | No  |
| Pellet                           | 2005614879 | pfam02786                                                   | Biotin carboxylase                                                                                         | 259  |              | COG4770 | I   |                     | No  | No  |
| Pellet                           | 2005572969 | pfam03099                                                   | Biotin-(acetyl-CoA carboxylase) ligase                                                                     | 147  |              | COG0340 | H   |                     | No  | No  |
| Global                           | 2005599120 |                                                             | BNR domain protein                                                                                         | 297  |              |         |     |                     | No  | No  |
| Pellet                           | 2005579774 |                                                             | BNR domain protein                                                                                         | 463  |              |         |     |                     | No  | No  |
| Pellet                           | 2005583815 |                                                             | BNR domain protein                                                                                         | 264  |              |         |     |                     | No  | No  |
| Pellet                           | 2005585175 |                                                             | BNR domain protein                                                                                         | 429  |              |         |     |                     | No  | No  |
| Pellet                           | 2005600208 |                                                             | BNR domain protein                                                                                         | 273  |              |         |     |                     | No  | No  |
| Pellet                           | 2005600548 |                                                             | BNR domain protein                                                                                         | 277  |              |         |     |                     | Yes | No  |
| Pellet                           | 2005604615 |                                                             | BNR domain protein                                                                                         | 280  |              |         |     |                     | No  | No  |
| Pellet                           | 2005607343 |                                                             | BNR domain protein                                                                                         | 312  |              |         |     |                     | No  | No  |
| Pellet                           | 2005565687 |                                                             | BNR repeat domain protein                                                                                  | 231  |              |         |     |                     | No  | No  |
| Pellet / Soluble                 | 2005567944 | pfam01063                                                   | Branched-chain amino acid aminotransferase/4-amin o-4-deoxychorismate lyase                                | 103  |              | COG0115 | E H |                     | No  | No  |
| Soluble / Supernatant            | 2005571701 | pfam01063                                                   | Branched-chain amino acid aminotransferase/4-amin o-4-deoxychorismate lyase                                | 323  | EC:2.6.1.42  | COG0115 | E H | TIGR01123           | No  | No  |
| Global                           | 2005587917 | pfam00871                                                   | Butyrate kinase                                                                                            | 80   |              | COG3426 | C   |                     | No  | No  |
| Pellet                           | 2005561424 | pfam00027                                                   | cAMP-binding proteins - catabolite gene activator and regulatory subunit of cAMP-dependent protein kinases | 215  |              | COG0664 | T   |                     | No  | No  |
| Pellet                           | 2005586273 | pfam00027                                                   | cAMP-binding proteins - catabolite gene activator and regulatory subunit of cAMP-dependent protein kinases | 307  |              | COG0664 | T   |                     | No  | No  |
| Pellet                           | 2005598329 | pfam00027 pfam00990                                         | cAMP-binding proteins - catabolite gene activator and regulatory subunit of cAMP-dependent protein kinases | 202  |              | COG0664 | T   |                     | No  | No  |
| Pellet                           | 2005618260 | pfam00027                                                   | cAMP-binding proteins - catabolite gene activator and regulatory subunit of cAMP-dependent protein kinases | 214  |              | COG0664 | T   |                     | No  | No  |
| Soluble                          | 2005574231 | pfam00696                                                   | Carbamate kinase                                                                                           | 314  | EC:2.7.2.2   | COG0549 | E   | TIGR00746           | No  | No  |
| Pellet                           | 2005561400 | pfam00289 pfam02786                                         | Carbamoylphosphate synthase large subunit (split gene in MJ)                                               | 312  |              | COG0458 | E F |                     | Yes | No  |
| Pellet                           | 2005566846 | pfam00289 pfam01678 pfam02142 pfam02655 pfam02786 pfam02787 | Carbamoylphosphate synthase large subunit (split gene in MJ)                                               | 1150 | EC:6.3.5.5   | COG0458 | E F | TIGR00652 TIGR01369 | No  | No  |
| Soluble                          | 2005580417 | pfam00289 pfam01678 pfam02142 pfam02655 pfam02786 pfam02787 | Carbamoylphosphate synthase large subunit (split gene in MJ)                                               | 1212 | EC:6.3.5.5   | COG0458 | E F | TIGR00652 TIGR01369 | No  | No  |
| Supernatant                      | 2005562339 | pfam02142 pfam02786                                         | Carbamoylphosphate synthase large subunit (split gene in MJ)                                               | 338  |              | COG0458 | E F |                     | No  | No  |
| Supernatant                      | 2005573612 | pfam00117 pfam00988                                         | Carbamoylphosphate synthase small subunit                                                                  | 359  | EC:6.3.5.5   | COG0505 | F E | TIGR01368           | No  | No  |
| Supernatant                      | 2005619813 | pfam00936                                                   | Carbon dioxide concentrating mechanism/carboxysome shell protein                                           | 78   |              | COG4577 | Q C |                     | No  | No  |
| Global / Soluble                 | 2005571760 | pfam00484                                                   | Carbonic anhydrase                                                                                         | 190  | EC:4.2.1.1   | COG0288 | P   |                     | No  | No  |
| Pellet / Supernatant / Global    | 2005615145 | pfam00484                                                   | Carbonic anhydrase                                                                                         | 165  |              | COG0288 | P   |                     | No  | No  |
| Soluble                          | 2005571762 | pfam00484                                                   | Carbonic anhydrase                                                                                         | 104  |              | COG0288 | P   |                     | No  | No  |
| Pellet                           | 2005561654 | pfam00702                                                   | Cation transport ATPase                                                                                    | 285  |              | COG0474 | P   | TIGR01494           | No  | Yes |
| Pellet                           | 2005568718 | pfam00689 pfam00702                                         | Cation transport ATPase                                                                                    | 471  |              | COG0474 | P   | TIGR01494 TIGR01524 | No  | Yes |
| Supernatant                      | 2005586808 | pfam00122 pfam00702                                         | Cation transport ATPase                                                                                    | 450  |              | COG2217 | P   | TIGR01494 TIGR01525 | No  | Yes |
| Pellet                           | 2005564757 | pfam00873                                                   | Cation/multidrug efflux pump                                                                               | 441  |              | COG0841 | V   |                     | No  | Yes |
| Pellet                           | 2005625821 | pfam00873                                                   | Cation/multidrug efflux pump                                                                               | 257  |              | COG0841 | V   |                     | No  | No  |
| Soluble                          | 2005623189 | pfam00873                                                   | Cation/multidrug efflux pump                                                                               | 214  |              | COG0841 | V   |                     | No  | No  |
| Supernatant                      | 2005612802 | pfam00873                                                   | Cation/multidrug efflux pump                                                                               | 276  |              | COG0841 | V   |                     | No  | Yes |
| Insoluble                        | 2005611395 | pfam00091 pfam03953                                         | Cell division GTPase                                                                                       | 293  |              | COG0206 | D   | TIGR00065           | No  | No  |
| Pellet                           | 2005599554 | pfam00091                                                   | Cell division GTPase                                                                                       | 171  |              | COG0206 | D   | TIGR00065           | No  | No  |
| Pellet                           | 2005623346 | pfam00091 pfam03953                                         | Cell division GTPase                                                                                       | 234  |              | COG0206 | D   | TIGR00065           | No  | No  |
| Global                           | 2005621535 |                                                             | Cell division initiation protein                                                                           | 143  |              |         |     |                     | No  | No  |

|                                         |            |                                         |                                                                                                       |     |              |         |     |           |    |    |
|-----------------------------------------|------------|-----------------------------------------|-------------------------------------------------------------------------------------------------------|-----|--------------|---------|-----|-----------|----|----|
| Supernatant                             | 2005632943 | pfam00905 pfam03717                     | Cell division protein FtsI/penicillin-binding protein 2                                               | 258 |              | COG0768 | M   |           | No | No |
| Global                                  | 2005602443 |                                         | Cellobiose phosphorylase                                                                              | 168 |              | COG3459 | G   |           | No | No |
| Insoluble / Pellet / Supernatant        | 2005570888 |                                         | Cellobiose phosphorylase                                                                              | 354 |              | COG3459 | G   |           | No | No |
| Pellet                                  | 2005564195 | pfam06205                               | Cellobiose phosphorylase                                                                              | 587 |              | COG3459 | G   |           | No | No |
| Pellet / Soluble                        | 2005562106 | pfam06165 pfam06204 pfam06205           | Cellobiose phosphorylase                                                                              | 563 |              | COG3459 | G   |           | No | No |
| Pellet / Supernatant                    | 2005560107 | pfam06165 pfam06204 pfam06205           | Cellobiose phosphorylase                                                                              | 818 | EC:2.4.1.-   | COG3459 | G   |           | No | No |
| Soluble                                 | 2005561891 |                                         | Cellobiose phosphorylase                                                                              | 257 |              | COG3459 | G   |           | No | No |
| Soluble                                 | 2005571113 | pfam06165 pfam06204 pfam06205           | Cellobiose phosphorylase                                                                              | 821 | EC:2.4.1.-   | COG3459 | G   |           | No | No |
| Soluble                                 | 2005572117 | pfam06165 pfam06204 pfam06205           | Cellobiose phosphorylase                                                                              | 821 | EC:2.4.1.-   | COG3459 | G   |           | No | No |
| Soluble                                 | 2005579786 |                                         | Cellobiose phosphorylase                                                                              | 522 |              | COG3459 | G   |           | No | No |
| Soluble                                 | 2005588918 | pfam06165 pfam06204 pfam06205           | Cellobiose phosphorylase                                                                              | 729 | EC:2.4.1.-   | COG3459 | G   |           | No | No |
| Soluble                                 | 2005590144 | pfam06165 pfam06204 pfam06205           | Cellobiose phosphorylase                                                                              | 801 | EC:2.4.1.-   | COG3459 | G   |           | No | No |
| Supernatant                             | 2005560111 | pfam06165 pfam06204 pfam06205           | Cellobiose phosphorylase                                                                              | 797 | EC:2.4.1.-   | COG3459 | G   |           | No | No |
| Supernatant                             | 2005569916 |                                         | Cellobiose phosphorylase                                                                              | 409 |              | COG3459 | G   |           | No | No |
| Supernatant / Soluble                   | 2005561892 | pfam06165 pfam06204 pfam06205           | Cellobiose phosphorylase                                                                              | 456 |              | COG3459 | G   |           | No | No |
| Pellet                                  | 2005593893 | pfam00759                               | Cellulase                                                                                             | 490 | EC:3.2.1.4   |         |     |           | No | No |
| Global / Soluble                        | 2005570599 | pfam00118                               | Chaperonin GroEL (HSP60 family)                                                                       | 288 |              | COG0459 | O   | TIGR02348 | No | No |
| Global / Soluble                        | 2005597867 | pfam00118                               | Chaperonin GroEL (HSP60 family)                                                                       | 265 |              | COG0459 | O   | TIGR02348 | No | No |
| Global / Supernatant                    | 2005586832 | pfam00118                               | Chaperonin GroEL (HSP60 family)                                                                       | 337 |              | COG0459 | O   | TIGR02348 | No | No |
| Insoluble                               | 2005580425 | pfam00118                               | Chaperonin GroEL (HSP60 family)                                                                       | 471 | EC:1.3.1.-   | COG0459 | O   | TIGR02348 | No | No |
| Pellet                                  | 2005587255 | pfam00118                               | Chaperonin GroEL (HSP60 family)                                                                       | 241 |              | COG0459 | O   | TIGR02348 | No | No |
| Pellet                                  | 2005593235 | pfam00118                               | Chaperonin GroEL (HSP60 family)                                                                       | 241 |              | COG0459 | O   | TIGR02348 | No | No |
| Pellet                                  | 2005597996 | pfam00118                               | Chaperonin GroEL (HSP60 family)                                                                       | 276 |              | COG0459 | O   | TIGR02348 | No | No |
| Pellet                                  | 2005624591 | pfam00118                               | Chaperonin GroEL (HSP60 family)                                                                       | 256 |              | COG0459 | O   | TIGR02348 | No | No |
| Pellet                                  | 2005629014 | pfam00118                               | Chaperonin GroEL (HSP60 family)                                                                       | 246 |              | COG0459 | O   | TIGR02348 | No | No |
| Supernatant                             | 2005581236 | pfam00118                               | Chaperonin GroEL (HSP60 family)                                                                       | 402 |              | COG0459 | O   | TIGR02348 | No | No |
| Supernatant                             | 2005632001 | pfam00118                               | Chaperonin GroEL (HSP60 family)                                                                       | 170 |              | COG0459 | O   |           | No | No |
| Soluble                                 | 2005567086 |                                         | Chemotaxis protein CheX, putative                                                                     | 162 |              | COG1406 | N   |           | No | No |
| Global / Supernatant                    | 2005575506 | pfam01627                               | Chemotaxis protein histidine kinase and related kinases                                               | 170 |              | COG0643 | N T |           | No | No |
| Insoluble                               | 2005575505 | pfam01584                               | Chemotaxis protein histidine kinase and related kinases                                               | 221 |              | COG0643 | N T |           | No | No |
| Insoluble / Soluble                     | 2005575320 | pfam01584 pfam02518                     | Chemotaxis protein histidine kinase and related kinases                                               | 394 |              | COG0643 | T N |           | No | No |
| Insoluble / Supernatant                 | 2005575321 | pfam01627 pfam07194                     | Chemotaxis protein histidine kinase and related kinases                                               | 315 |              | COG0643 | T N |           | No | No |
| Pellet                                  | 200565597  | pfam00072 pfam01584 pfam01627 pfam02518 | Chemotaxis protein histidine kinase and related kinases                                               | 723 | EC:2.7.3.-   | COG0643 | T N |           | No | No |
| Pellet                                  | 2005567778 | pfam02518                               | Chemotaxis protein histidine kinase and related kinases                                               | 290 |              | COG0643 | N T |           | No | No |
| Pellet                                  | 2005578218 | pfam02518                               | Chemotaxis protein histidine kinase and related kinases                                               | 175 |              | COG0643 | T N |           | No | No |
| Pellet                                  | 2005586011 | pfam02895 pfam07194                     | Chemotaxis protein histidine kinase and related kinases                                               | 457 |              | COG0643 | T N | Yes       | No | No |
| Pellet                                  | 2005587818 | pfam01584                               | Chemotaxis protein histidine kinase and related kinases                                               | 120 |              | COG0643 | N T | Yes       | No | No |
| Pellet                                  | 2005625427 | pfam02895                               | Chemotaxis protein histidine kinase and related kinases                                               | 235 |              | COG0643 | N T | No        | No | No |
| Pellet                                  | 2005627444 | pfam02895                               | Chemotaxis protein histidine kinase and related kinases                                               | 276 |              | COG0643 | N T | Yes       | No | No |
| Pellet / Soluble                        | 2005613451 | pfam02518 pfam02895                     | Chemotaxis protein histidine kinase and related kinases                                               | 240 |              | COG0643 | N T | No        | No | No |
| Pellet / Supernatant                    | 2005605879 | pfam02518 pfam02895                     | Chemotaxis protein histidine kinase and related kinases                                               | 292 |              | COG0643 | N T | Yes       | No | No |
| Soluble                                 | 2005586319 | pfam01627 pfam02895                     | Chemotaxis protein histidine kinase and related kinases                                               | 294 |              | COG0643 | N T | No        | No | No |
| Supernatant                             | 2005626143 | pfam07194                               | Chemotaxis protein histidine kinase and related kinases                                               | 213 |              | COG0643 | N T | No        | No | No |
| Supernatant / Global                    | 2005623277 | pfam01584 pfam02518                     | Chemotaxis protein histidine kinase and related kinases                                               | 240 |              | COG0643 | N T | No        | No | No |
| Pellet                                  | 2005569654 | pfam03975                               | Chemotaxis protein; stimulates methylation of MCP proteins                                            | 160 |              | COG1871 | T N |           | No | No |
| Global / Pellet                         | 2005583078 | pfam00072 pfam01339                     | Chemotaxis response regulator containing a CheY-I like receiver domain and a methyltransferase domain | 378 | EC:3.1.1.61  | COG2201 | T N |           | No | No |
| Pellet                                  | 2005561469 | pfam01339                               | Chemotaxis response regulator containing a CheY-I like receiver domain and a methyltransferase domain | 303 | EC:3.1.1.61  | COG2201 | N T | Yes       | No | No |
| Pellet / Insoluble                      | 2005618650 | pfam01339                               | Chemotaxis response regulator containing a CheY-I like receiver domain and a methyltransferase domain | 77  |              | COG2201 | N T | No        | No | No |
| Pellet / Supernatant                    | 2005568844 | pfam00072                               | Chemotaxis response regulator containing a CheY-I like receiver domain and a methyltransferase domain | 185 |              | COG2201 | N T | No        | No | No |
| Pellet / Supernatant                    | 2005625096 | pfam01339                               | Chemotaxis response regulator containing a CheY-I like receiver domain and a methyltransferase domain | 229 |              | COG2201 | N T | Yes       | No | No |
| Supernatant                             | 2005589029 | pfam00072 pfam01339                     | Chemotaxis response regulator containing a CheY-I like receiver domain and a methyltransferase domain | 380 | EC:3.1.1.61  | COG2201 | N T | No        | No | No |
| Supernatant / Global                    | 2005563536 | pfam00072 pfam01339                     | Chemotaxis response regulator containing a CheY-I like receiver domain and a methyltransferase domain | 381 | EC:3.1.1.61  | COG2201 | T N | No        | No | No |
| Supernatant / Insoluble / Soluble       | 2005626356 | pfam00072 pfam01339                     | Chemotaxis response regulator containing a CheY-I like receiver domain and a methyltransferase domain | 246 |              | COG2201 | N T | No        | No | No |
| Supernatant / Soluble                   | 2005623903 | pfam01339                               | Chemotaxis response regulator containing a CheY-I like receiver domain and a methyltransferase domain | 275 | EC:3.1.1.61  | COG2201 | T N | No        | No | No |
| Global / Insoluble                      | 2005575319 | pfam01584                               | Chemotaxis signal transduction protein                                                                | 91  |              | COG0835 | T N | No        | No | No |
| Global / Insoluble / Pellet / Soluble   | 2005597559 | pfam01584                               | Chemotaxis signal transduction protein                                                                | 77  |              | COG0835 | T N | No        | No | No |
| Insoluble                               | 2005564901 | pfam01584                               | Chemotaxis signal transduction protein                                                                | 164 |              | COG0835 | N T | No        | No | No |
| Pellet                                  | 2005605311 | pfam01584                               | Chemotaxis signal transduction protein                                                                | 256 |              | COG0835 | T N | No        | No | No |
| Pellet                                  | 2005625428 | pfam01584                               | Chemotaxis signal transduction protein                                                                | 230 |              | COG0835 | N T | No        | No | No |
| Pellet / Soluble                        | 2005587817 | pfam01584                               | Chemotaxis signal transduction protein                                                                | 225 |              | COG0835 | N T | No        | No | No |
| Pellet / Soluble / Supernatant          | 2005596564 | pfam01584                               | Chemotaxis signal transduction protein                                                                | 135 |              | COG0835 | N T | No        | No | No |
| Pellet / Supernatant                    | 2005586010 | pfam01584                               | Chemotaxis signal transduction protein                                                                | 285 |              | COG0835 | N T | No        | No | No |
| Pellet / Supernatant                    | 2005602388 | pfam01584                               | Chemotaxis signal transduction protein                                                                | 228 |              | COG0835 | N T | No        | No | No |
| Pellet / Supernatant / Global           | 2005613578 | pfam01584                               | Chemotaxis signal transduction protein                                                                | 135 |              | COG0835 | N T | No        | No | No |
| Soluble                                 | 2005568115 | pfam01584                               | Chemotaxis signal transduction protein                                                                | 114 |              | COG0835 | N T | No        | No | No |
| Soluble                                 | 2005570083 | pfam01584                               | Chemotaxis signal transduction protein                                                                | 317 |              | COG0835 | N T | No        | No | No |
| Soluble                                 | 2005576086 | pfam01584 pfam01739                     | Chemotaxis signal transduction protein                                                                | 411 |              | COG0835 | N T | No        | No | No |
| Soluble                                 | 2005587989 | pfam01584                               | Chemotaxis signal transduction protein                                                                | 115 |              | COG0835 | N T | No        | No | No |
| Soluble                                 | 2005603112 | pfam01584                               | Chemotaxis signal transduction protein                                                                | 169 | EC:2.7.3.-   | COG0835 | N T | No        | No | No |
| Soluble / Supernatant                   | 2005594840 | pfam01584                               | Chemotaxis signal transduction protein                                                                | 156 |              | COG0835 | N T | No        | No | No |
| Supernatant                             | 2005562208 | pfam01584                               | Chemotaxis signal transduction protein                                                                | 173 |              | COG0835 | T N | No        | No | No |
| Supernatant                             | 2005568117 | pfam01584                               | Chemotaxis signal transduction protein                                                                | 262 |              | COG0835 | T N | No        | No | No |
| Pellet                                  | 2005589013 | pfam01270                               | Chitinase                                                                                             | 280 |              |         |     |           | No | No |
| Pellet                                  | 2005561326 |                                         | Chromosome segregation ATPases                                                                        | 273 |              | COG1196 | D   |           | No | No |
| Pellet                                  | 2005576489 | pfam02463                               | Chromosome segregation ATPases                                                                        | 994 | EC:3.6.4.1   | COG1196 | D   | TIGR02168 | No | No |
| Pellet                                  | 2005564725 | pfam00285                               | Citrate synthase                                                                                      | 435 | EC:2.3.3.1   | COG0372 | C   | TIGR01798 | No | No |
| Pellet / Soluble                        | 2005568772 | pfam00285                               | Citrate synthase                                                                                      | 435 | EC:2.3.3.1   | COG0372 | C   | TIGR01798 | No | No |
| Pellet                                  | 2005568983 | pfam03598                               | CO dehydrogenase/acetyl-CoA synthase beta subunit                                                     | 520 |              | COG1614 | C   | TIGR00316 | No | No |
| Pellet                                  | 2005572920 | pfam03598 pfam03599                     | CO dehydrogenase/acetyl-CoA synthase beta subunit                                                     | 989 | EC:2.3.1.169 | COG1614 | C   | TIGR00316 | No | No |
| Soluble                                 | 2005620458 | pfam03599                               | CO dehydrogenase/acetyl-CoA synthase complex subunit gamma (EC 1.2.99.2)                              | 59  |              | COG1456 | C   |           | No | No |
| Soluble / Global                        | 2005612798 |                                         | CO dehydrogenase/acetyl-CoA synthase delta subunit (corrinoid Fe-S protein)                           | 106 |              | COG2069 | C   |           | No | No |
| Supernatant / Insoluble                 | 2005611752 | pfam03599                               | CO dehydrogenase/acetyl-CoA synthase gamma subunit (corrinoid Fe-S protein)                           | 282 |              | COG1456 | C   |           | No | No |
| Pellet                                  | 2005573093 | pfam00166                               | Co-chaperonin GroES (HSP10)                                                                           | 90  |              | COG0234 | O   | No        | No | No |
| Pellet                                  | 2005593237 | pfam00166                               | Co-chaperonin GroES (HSP10)                                                                           | 94  | EC:1.3.1.-   | COG0234 | O   | No        | No | No |
| Pellet                                  | 2005632179 | pfam00166                               | Co-chaperonin GroES (HSP10)                                                                           | 87  |              | COG0234 | O   | No        | No | No |
| Pellet / Supernatant / Soluble / Global | 2005613205 | pfam00166                               | Co-chaperonin GroES (HSP10)                                                                           | 90  |              | COG0234 | O   | No        | No | No |
| Pellet                                  | 2005568548 | pfam00501                               | Coenzyme F390 synthetase                                                                              | 406 | EC:6.2.1.30  | COG1541 | H   |           | No | No |

|                               |            |                               |                                                                                                     |     |                         |         |    |                     |     |     |
|-------------------------------|------------|-------------------------------|-----------------------------------------------------------------------------------------------------|-----|-------------------------|---------|----|---------------------|-----|-----|
| Pellet / Soluble              | 2005568475 | pfam00501                     | Coenzyme F390 synthetase                                                                            | 424 | EC:6.2.1.30             | COG1541 | H  |                     | No  | No  |
| Pellet / Soluble / Global     | 2005561008 | pfam00501                     | Coenzyme F390 synthetase                                                                            | 423 | EC:6.2.1.30             | COG1541 | H  |                     | No  | No  |
| Soluble                       | 2005560203 | pfam00501                     | Coenzyme F390 synthetase                                                                            | 437 | EC:6.2.1.30             | COG1541 | H  |                     | No  | No  |
| Soluble                       | 2005562528 | pfam00501                     | Coenzyme F390 synthetase                                                                            | 216 |                         | COG1541 | H  |                     | No  | No  |
| Soluble                       | 2005563699 | pfam00501                     | Coenzyme F390 synthetase                                                                            | 373 | EC:6.2.1.30             | COG1541 | H  |                     | No  | No  |
| Soluble                       | 2005568473 | pfam00501                     | Coenzyme F390 synthetase                                                                            | 433 | EC:6.2.1.30             | COG1541 | H  |                     | No  | No  |
| Supernatant                   | 2005593594 |                               | Coenzyme F390 synthetase                                                                            | 144 |                         | COG1541 | H  |                     | No  | No  |
| Supernatant                   | 2005582347 | pfam00313                     | Cold shock proteins                                                                                 | 67  |                         | COG1278 | K  |                     | No  | No  |
| Global                        | 2005627154 |                               | Conserved domain protein                                                                            | 174 |                         |         |    |                     | No  | No  |
| Insoluble                     | 2005568909 | pfam04055                     | Conserved domain protein                                                                            | 522 |                         | COG1861 | M  |                     | No  | No  |
| Pellet                        | 2005607477 |                               | Conserved domain protein                                                                            | 280 |                         |         |    |                     | No  | No  |
| Pellet / Soluble              | 2005567885 |                               | Conserved domain protein                                                                            | 117 |                         |         |    |                     | No  | No  |
| Soluble                       | 2005565337 |                               | Conserved domain protein                                                                            | 257 |                         |         |    |                     | No  | No  |
| Pellet                        | 2005573219 | pfam08757                     | Conserved hypothetical protein                                                                      | 455 |                         |         |    |                     | No  | No  |
| Soluble                       | 2005588651 | pfam02591                     | Conserved hypothetical protein                                                                      | 240 |                         | COG1579 | R  |                     | No  | No  |
| Supernatant                   | 2005606969 |                               | Conserved hypothetical protein                                                                      | 215 |                         |         |    |                     | No  | No  |
| Global                        | 2005582764 | pfam09820                     | Conserved hypothetical protein with a conserved domain                                              | 280 |                         |         |    |                     | No  | No  |
| Global                        | 2005608858 |                               | Conserved protein                                                                                   | 263 |                         |         |    |                     | No  | No  |
| Supernatant                   | 2005569963 |                               | Conserved protein                                                                                   | 297 |                         |         |    |                     | No  | No  |
| Soluble                       | 2005573501 | pfam01613                     | Conserved protein/domain typically associated with flavoprotein oxygenases, DIM6/NTAB family        | 190 |                         | COG1853 | R  |                     | No  | No  |
| Supernatant                   | 2005571547 | pfam00301 pfam01613           | Conserved protein/domain typically associated with flavoprotein oxygenases, DIM6/NTAB family        | 321 |                         | COG1853 | R  |                     | Yes | No  |
| Supernatant                   | 2005626701 | pfam04055                     | Coproporphyrinogen III oxidase and related Fe-S oxidoreductases                                     | 151 |                         | COG0635 | H  |                     | No  | No  |
| Global                        | 2005606904 | pfam01128                     | CTP                                                                                                 | 142 |                         | COG1213 | M  |                     | No  | No  |
| Pellet                        | 2005565867 | pfam00117 pfam06418           | CTP synthase (UTP-ammonia lyase)                                                                    | 300 |                         | COG0504 | F  | TIGR00337           | No  | No  |
| Pellet                        | 2005565869 | pfam00117 pfam06418           | CTP synthase (UTP-ammonia lyase)                                                                    | 531 | EC:6.3.4.2              | COG0504 | F  | TIGR00337           | No  | No  |
| Supernatant                   | 2005585373 | pfam06418                     | CTP synthase (UTP-ammonia lyase)                                                                    | 238 |                         | COG0504 | F  | TIGR00337           | Yes | No  |
| Soluble                       | 2005566712 | pfam01053                     | Cystathionine beta-lyases/cystathionine gamma-synthases                                             | 374 | EC:2.5.1.48             | COG0626 | E  |                     | Yes | No  |
| Soluble                       | 2005574929 | pfam00266                     | Cysteine sulfinate desulfurase/cysteine desulfurase and related enzymes                             | 282 |                         | COG1104 | E  |                     | No  | No  |
| Global / Pellet / Supernatant | 2005586715 | pfam00291                     | Cysteine synthase                                                                                   | 216 |                         | COG0031 | E  |                     | No  | No  |
| Pellet                        | 2005622575 |                               | Cysteine synthase                                                                                   | 273 |                         | COG0031 | E  |                     | No  | No  |
| Pellet / Soluble              | 2005566708 | pfam00291                     | Cysteine synthase                                                                                   | 186 |                         | COG0031 | E  |                     | No  | No  |
| Soluble                       | 2005563791 | pfam00291                     | Cysteine synthase                                                                                   | 266 | EC:2.5.1.47             | COG0031 | E  |                     | No  | No  |
| Soluble                       | 2005568331 | pfam00291                     | Cysteine synthase                                                                                   | 118 |                         | COG0031 | E  |                     | No  | No  |
| Soluble                       | 2005568431 | pfam00291                     | Cysteine synthase                                                                                   | 296 | EC:2.5.1.47             | COG0031 | E  |                     | No  | No  |
| Soluble                       | 2005578864 |                               | Cysteine synthase                                                                                   | 333 |                         | COG0031 | E  |                     | No  | No  |
| Soluble                       | 2005579973 | pfam00291                     | Cysteine synthase                                                                                   | 261 | EC:2.5.1.47             | COG0031 | E  | TIGR01139 TIGR01136 | No  | No  |
| Soluble                       | 2005593358 | pfam00291                     | Cysteine synthase                                                                                   | 309 | EC:2.5.1.47             | COG0031 | E  |                     | No  | No  |
| Soluble                       | 2005624929 | pfam00291                     | Cysteine synthase                                                                                   | 103 |                         | COG0031 | E  |                     | No  | No  |
| Soluble / Supernatant         | 2005571959 | pfam00291                     | Cysteine synthase                                                                                   | 188 |                         | COG0031 | E  |                     | No  | No  |
| Soluble / Supernatant         | 2005607318 | pfam00291                     | Cysteine synthase                                                                                   | 159 |                         | COG0031 | E  |                     | No  | No  |
| Supernatant                   | 2005577608 | pfam00291                     | Cysteine synthase                                                                                   | 285 | EC:2.5.1.47 EC:4.2.99.8 | COG0031 | E  | TIGR01139 TIGR01136 | No  | No  |
| Supernatant                   | 2005584088 | pfam00291                     | Cysteine synthase                                                                                   | 298 | EC:2.5.1.47             | COG0031 | E  | TIGR01136 TIGR01138 | No  | No  |
| Supernatant                   | 2005631863 | pfam00291                     | Cysteine synthase                                                                                   | 288 | EC:2.5.1.47             | COG0031 | E  |                     | No  | No  |
| Pellet                        | 2005632054 |                               | Cysteinyl-tRNA synthetase                                                                           | 97  |                         | COG0215 | J  |                     | No  | No  |
| Soluble                       | 2005610211 |                               | Cytidylate kinase                                                                                   | 112 |                         | COG1102 | F  |                     | No  | No  |
| Supernatant                   | 2005617984 | pfam02224                     | Cytidylate kinase                                                                                   | 102 |                         | COG1102 | F  |                     | No  | No  |
| Pellet                        | 2005564973 | pfam01467                     | Cytidylyltransferase                                                                                | 169 |                         | COG0615 | IM | TIGR00125           | No  | No  |
| Pellet                        | 2005598954 |                               | Cytidylyltransferase domain protein                                                                 | 205 |                         |         |    |                     | No  | No  |
| Supernatant                   | 2005628167 |                               | Cytidylyltransferase domain protein                                                                 | 125 |                         | COG3980 | M  |                     | No  | No  |
| Pellet                        | 2005616255 | pfam02683                     | Cytochrome c biogenesis protein                                                                     | 104 |                         | COG0785 | O  |                     | Yes | Yes |
| Global                        | 2005593532 |                               | Cytoplasmic filament protein A                                                                      | 435 |                         |         |    |                     | No  | No  |
| Global                        | 2005603812 |                               | Cytoplasmic filament protein A                                                                      | 283 |                         |         |    |                     | No  | No  |
| Global / Insoluble            | 2005587649 |                               | Cytoplasmic filament protein A                                                                      | 533 |                         |         |    |                     | No  | No  |
| Insoluble                     | 2005569154 |                               | Cytoplasmic filament protein A                                                                      | 446 |                         |         |    |                     | No  | No  |
| Insoluble / Pellet            | 2005581095 |                               | Cytoplasmic filament protein A                                                                      | 444 |                         |         |    |                     | No  | No  |
| Supernatant                   | 2005576406 |                               | Cytoplasmic filament protein A                                                                      | 577 |                         |         |    |                     | No  | No  |
| Supernatant                   | 2005590478 |                               | Cytoplasmic filament protein A                                                                      | 458 |                         |         |    |                     | No  | No  |
| Supernatant                   | 2005565589 | pfam01979                     | Cytosine deaminase and related metal-dependent hydrolases                                           | 300 |                         | COG0402 | FR | TIGR03314           | No  | No  |
| Pellet                        | 2005579670 | pfam01820 pfam07478           | D-alanine-D-alanine ligase and related ATP-grasp enzymes                                            | 269 | EC:6.3.2.4              | COG1181 | M  | TIGR01205           | No  | No  |
| Global                        | 2005601072 | pfam02779                     | Deoxyxylulose-5-phosphate synthase                                                                  | 246 |                         | COG1154 | IH |                     | No  | No  |
| Supernatant                   | 2005570676 | pfam01791                     | Dhna-type fructose-1,6-bisphosphate aldolase and related enzymes                                    | 294 | EC:4.2.1.-              | COG1830 | G  |                     | No  | No  |
| Soluble                       | 2005566581 | pfam02784                     | Diaminopimelate decarboxylase                                                                       | 174 |                         | COG0019 | E  |                     | No  | No  |
| Soluble                       | 2005584225 | pfam00278 pfam02784           | Diaminopimelate decarboxylase                                                                       | 305 | EC:4.1.1.17             | COG0019 | E  |                     | No  | No  |
| Soluble                       | 2005599700 | pfam00278 pfam02784           | Diaminopimelate decarboxylase                                                                       | 261 |                         | COG0019 | E  |                     | No  | No  |
| Pellet / Soluble              | 2005563622 | pfam00701                     | Dihydrodipicolinate synthase/N-acetylneuraminate lyase                                              | 300 | EC:4.2.1.52             | COG0329 | EM | TIGR00674           | No  | No  |
| Soluble / Supernatant         | 2005587346 | pfam00701                     | Dihydrodipicolinate synthase/N-acetylneuraminate lyase                                              | 292 | EC:4.2.1.52             | COG0329 | EM | TIGR00674 TIGR00683 | No  | No  |
| Global                        | 2005567679 | pfam01979                     | Dihydroorotase and related cyclic amidohydrolases                                                   | 209 |                         | COG0044 | F  |                     | No  | No  |
| Global                        | 2005591929 | pfam00920                     | Dihydroxyacid dehydratase/phosphogluconate dehydratase                                              | 453 | EC:4.2.1.9              | COG0129 | GE | TIGR00110           | No  | No  |
| Soluble                       | 2005561390 | pfam00920                     | Dihydroxyacid dehydratase/phosphogluconate dehydratase                                              | 284 |                         | COG0129 | EG |                     | No  | No  |
| Insoluble                     | 2005565275 | pfam00899 pfam05237           | Dimicelle-utilizing enzymes involved in molybdenum cofactor and thiamine biosynthesis family 2      | 280 |                         | COG0476 | H  |                     | No  | No  |
| Pellet                        | 2005592803 | pfam00899 pfam05237           | Dimicelle-utilizing enzymes involved in molybdenum cofactor and thiamine biosynthesis family 2      | 324 | EC:6.3.2.19             | COG0476 | H  |                     | No  | No  |
| Supernatant                   | 2005602993 | pfam09369                     | Distinct helicase family with a unique C-terminal domain including a metal-binding cysteine cluster | 225 |                         | COG1205 | R  |                     | No  | No  |
| Soluble                       | 2005588739 | pfam01555                     | DNA modification methylase                                                                          | 214 | EC:2.1.1.72             | COG0863 | L  |                     | No  | No  |
| Supernatant                   | 2005605366 | pfam04851                     | DNA or RNA helicases of superfamily II                                                              | 275 |                         | COG1061 | KL |                     | Yes | No  |
| Insoluble                     | 2005563468 | pfam00476                     | DNA polymerase I - 3'-5' exonuclease and polymerase domains                                         | 424 |                         | COG0749 | L  | TIGR00593           | No  | No  |
| Soluble                       | 2005598678 | pfam01612                     | DNA polymerase I - 3'-5' exonuclease and polymerase domains                                         | 243 |                         | COG0749 | L  |                     | No  | No  |
| Supernatant                   | 2005601699 | pfam01336                     | DNA polymerase III, alpha subunit                                                                   | 274 |                         | COG0587 | L  |                     | No  | No  |
| Pellet                        | 2005613278 | pfam00929                     | DNA polymerase III, epsilon subunit and related 3'-5' exonucleases                                  | 180 |                         | COG0847 | L  |                     | No  | No  |
| Supernatant                   | 2005563293 | pfam00712 pfam02767 pfam02768 | DNA polymerase sliding clamp subunit (PCNA homolog)                                                 | 316 | EC:2.7.7.7              | COG0592 | L  | TIGR00663           | No  | No  |
| Soluble                       | 2005588094 | pfam01807                     | DNA primase (bacterial type)                                                                        | 120 |                         | COG0358 | L  |                     | No  | No  |
| Supernatant                   | 2005624157 |                               | DNA repair proteins                                                                                 | 139 |                         | COG2003 | L  |                     | No  | No  |
| Supernatant                   | 2005576567 | pfam01695 pfam08483           | DNA replication protein                                                                             | 246 |                         | COG1484 | L  |                     | No  | No  |
| Pellet                        | 2005633018 | pfam04539 pfam04542           | DNA-directed RNA polymerase specialized sigma subunit                                               | 134 |                         | COG1191 | K  |                     | No  | No  |
| Insoluble                     | 2005578965 | pfam01000                     | DNA-directed RNA polymerase, alpha subunit/40 kD subunit                                            | 201 | EC:2.7.7.6              | COG0202 | K  | TIGR02027           | No  | No  |
| Pellet                        | 2005560676 | pfam01000 pfam03118           | DNA-directed RNA polymerase, alpha subunit/40 kD subunit                                            | 283 | EC:2.7.7.6              | COG0202 | K  | TIGR02027           | No  | No  |
| Pellet                        | 2005579759 | pfam01000                     | DNA-directed RNA polymerase, alpha subunit/40 kD subunit                                            | 192 |                         | COG0202 | K  | TIGR02027           | No  | No  |
| Pellet                        | 2005585659 | pfam01193 pfam03118           | DNA-directed RNA polymerase, alpha subunit/40 kD subunit                                            | 145 |                         | COG0202 | K  | TIGR02027           | No  | No  |

|                                         |            |                                                   |                                                                                        |      |             |         |     |                     |     |    |
|-----------------------------------------|------------|---------------------------------------------------|----------------------------------------------------------------------------------------|------|-------------|---------|-----|---------------------|-----|----|
| Pellet                                  | 2005590280 | pfam01000 pfam01193 pfam03118                     | DNA-directed RNA polymerase, alpha subunit/40 kD subunit                               | 268  |             | COG0202 | K   | TIGR02027           | No  | No |
| Pellet / Global                         | 2005625529 | pfam01000 pfam01193 pfam03118                     | DNA-directed RNA polymerase, alpha subunit/40 kD subunit                               | 259  |             | COG0202 | K   | TIGR02027           | No  | No |
| Pellet / Soluble                        | 2005585291 | pfam01000 pfam03118                               | DNA-directed RNA polymerase, alpha subunit/40 kD subunit                               | 351  | EC:2.7.7.6  | COG0202 | K   | TIGR02027           | No  | No |
| Pellet / Soluble / Supernatant          | 2005578459 | pfam01000                                         | DNA-directed RNA polymerase, alpha subunit/40 kD subunit                               | 188  | EC:2.7.7.6  | COG0202 | K   | TIGR02027           | No  | No |
| Global                                  | 2005567200 | pfam00562 pfam04560 pfam10385                     | DNA-directed RNA polymerase, beta subunit/140 kD subunit                               | 648  |             | COG0085 | K   | TIGR02013           | No  | No |
| Global / Pellet                         | 2005603954 | pfam04561 pfam04565                               | DNA-directed RNA polymerase, beta subunit/140 kD subunit                               | 265  |             | COG0085 | K   |                     | No  | No |
| Insoluble                               | 2005595682 | pfam00562                                         | DNA-directed RNA polymerase, beta subunit/140 kD subunit                               | 384  |             | COG0085 | K   |                     | No  | No |
| Pellet                                  | 2005564577 | pfam04565 pfam10385                               | DNA-directed RNA polymerase, beta subunit/140 kD subunit                               | 236  |             | COG0085 | K   |                     | No  | No |
| Pellet                                  | 2005574874 | pfam00562 pfam04560                               | DNA-directed RNA polymerase, beta subunit/140 kD subunit                               | 549  | EC:2.7.7.6  | COG0085 | K   | TIGR02013           | No  | No |
| Pellet                                  | 2005577949 | pfam00562 pfam04560                               | DNA-directed RNA polymerase, beta subunit/140 kD subunit                               | 371  | EC:2.7.7.6  | COG0085 | K   |                     | No  | No |
| Pellet                                  | 2005582000 | pfam00562 pfam04565 pfam10385                     | DNA-directed RNA polymerase, beta subunit/140 kD subunit                               | 400  |             | COG0085 | K   |                     | No  | No |
| Pellet                                  | 2005583946 | pfam00562 pfam04561 pfam04565 pfam10385           | DNA-directed RNA polymerase, beta subunit/140 kD subunit                               | 862  |             | COG0085 | K   | TIGR02013           | No  | No |
| Pellet                                  | 2005586613 | pfam04561 pfam04563                               | DNA-directed RNA polymerase, beta subunit/140 kD subunit                               | 218  |             | COG0085 | K   |                     | No  | No |
| Pellet                                  | 2005613897 | pfam04561 pfam04565                               | DNA-directed RNA polymerase, beta subunit/140 kD subunit                               | 282  |             | COG0085 | K   |                     | No  | No |
| Pellet / Supernatant                    | 2005580527 | pfam04563                                         | DNA-directed RNA polymerase, beta subunit/140 kD subunit                               | 197  |             | COG0085 | K   |                     | No  | No |
| Soluble                                 | 2005564576 | pfam00562 pfam04560                               | DNA-directed RNA polymerase, beta subunit/140 kD subunit                               | 380  | EC:2.7.7.6  | COG0085 | K   |                     | No  | No |
| Supernatant                             | 2005565086 | pfam00562 pfam04561 pfam04565 pfam10385           | DNA-directed RNA polymerase, beta subunit/140 kD subunit                               | 1072 | EC:2.7.7.6  | COG0085 | K   | TIGR02013           | No  | No |
| Supernatant                             | 2005565919 | pfam00562 pfam04560                               | DNA-directed RNA polymerase, beta subunit/140 kD subunit                               | 493  | EC:2.7.7.6  | COG0085 | K   | TIGR02013           | No  | No |
| Supernatant / Insoluble / Global        | 2005563864 | pfam00562 pfam04560                               | DNA-directed RNA polymerase, beta subunit/140 kD subunit                               | 659  |             | COG0085 | K   | TIGR02013           | No  | No |
| Supernatant / Soluble                   | 2005563610 | pfam00562 pfam04560                               | DNA-directed RNA polymerase, beta subunit/140 kD subunit                               | 122  |             | COG0085 | K   |                     | No  | No |
| Insoluble                               | 2005567475 | pfam04998                                         | DNA-directed RNA polymerase, beta' subunit/160 kD subunit                              | 289  |             |         |     |                     | No  | No |
| Insoluble                               | 2005593476 | pfam00623 pfam04983 pfam04997 pfam04998 pfam05000 | DNA-directed RNA polymerase, beta' subunit/160 kD subunit                              | 1343 | EC:2.7.7.6  | COG0086 | K   | TIGR02386           | No  | No |
| Insoluble / Pellet                      | 2005570574 | pfam00623 pfam04983 pfam04998 pfam05000           | DNA-directed RNA polymerase, beta' subunit/160 kD subunit                              | 814  |             | COG0086 | K   |                     | No  | No |
| Pellet                                  | 2005563611 | pfam04997                                         | DNA-directed RNA polymerase, beta' subunit/160 kD subunit                              | 137  | EC:2.7.7.6  | COG0086 | K   |                     | No  | No |
| Pellet                                  | 2005564036 | pfam04983 pfam04998 pfam05000                     | DNA-directed RNA polymerase, beta' subunit/160 kD subunit                              | 556  |             | COG0086 | K   |                     | No  | No |
| Pellet                                  | 2005567474 | pfam04998                                         | DNA-directed RNA polymerase, beta' subunit/160 kD subunit                              | 387  |             |         |     |                     | No  | No |
| Pellet                                  | 2005570170 | pfam00623 pfam04983 pfam04997 pfam04998 pfam05000 | DNA-directed RNA polymerase, beta' subunit/160 kD subunit                              | 1444 | EC:2.7.7.6  | COG0086 | K   | TIGR02386           | No  | No |
| Pellet                                  | 2005579004 | pfam00623 pfam04983 pfam04997                     | DNA-directed RNA polymerase, beta' subunit/160 kD subunit                              | 666  |             | COG0086 | K   | TIGR02386           | No  | No |
| Pellet                                  | 2005579755 | pfam00623 pfam04983 pfam04997 pfam04998 pfam05000 | DNA-directed RNA polymerase, beta' subunit/160 kD subunit                              | 1296 | EC:2.7.7.6  | COG0086 | K   | TIGR02386           | No  | No |
| Pellet                                  | 2005583948 | pfam00623 pfam04997                               | DNA-directed RNA polymerase, beta' subunit/160 kD subunit                              | 456  |             | COG0086 | K   |                     | No  | No |
| Pellet                                  | 2005589301 | pfam04998                                         | DNA-directed RNA polymerase, beta' subunit/160 kD subunit                              | 472  |             |         |     |                     | No  | No |
| Pellet                                  | 2005621825 | pfam04983 pfam05000                               | DNA-directed RNA polymerase, beta' subunit/160 kD subunit                              | 234  |             | COG0086 | K   |                     | No  | No |
| Pellet                                  | 2005632044 | pfam00623 pfam04997                               | DNA-directed RNA polymerase, beta' subunit/160 kD subunit                              | 246  |             | COG0086 | K   |                     | No  | No |
| Pellet / Global                         | 2005567476 | pfam00623 pfam04983 pfam04997                     | DNA-directed RNA polymerase, beta' subunit/160 kD subunit                              | 563  |             | COG0086 | K   |                     | No  | No |
| Pellet / Supernatant                    | 2005581206 | pfam00623 pfam04983 pfam04997 pfam04998 pfam05000 | DNA-directed RNA polymerase, beta' subunit/160 kD subunit                              | 931  |             | COG0086 | K   | TIGR02386           | No  | No |
| Supernatant                             | 2005563863 | pfam00623 pfam04983 pfam04997                     | DNA-directed RNA polymerase, beta' subunit/160 kD subunit                              | 512  |             | COG0086 | K   |                     | No  | No |
| Supernatant                             | 2005568403 | pfam00623 pfam04983 pfam04997                     | DNA-directed RNA polymerase, beta' subunit/160 kD subunit                              | 691  |             | COG0086 | K   | TIGR02386           | No  | No |
| Supernatant                             | 2005579097 | pfam00623 pfam04983 pfam04997 pfam04998 pfam05000 | DNA-directed RNA polymerase, beta' subunit/160 kD subunit                              | 1055 |             | COG0086 | K   | TIGR02386           | No  | No |
| Supernatant                             | 2005592702 | pfam04998                                         | DNA-directed RNA polymerase, beta' subunit/160 kD subunit                              | 704  |             | COG0086 | K   |                     | No  | No |
| Supernatant                             | 2005629949 | pfam04998                                         | DNA-directed RNA polymerase, beta' subunit/160 kD subunit                              | 264  |             | COG0086 | K   |                     | No  | No |
| Supernatant / Global                    | 2005562612 | pfam04983 pfam04998 pfam05000                     | DNA-directed RNA polymerase, beta' subunit/160 kD subunit                              | 382  |             | COG0086 | K   |                     | No  | No |
| Supernatant / Insoluble / Soluble       | 2005563612 | pfam00623 pfam04983 pfam04998 pfam05000           | DNA-directed RNA polymerase, beta' subunit/160 kD subunit                              | 508  |             | COG0086 | K   |                     | No  | No |
| Supernatant / Soluble                   | 2005562987 | pfam04998                                         | DNA-directed RNA polymerase, beta' subunit/160 kD subunit                              | 457  |             |         |     |                     | No  | No |
| Pellet                                  | 2005562514 | pfam00140 pfam04539 pfam04542                     | DNA-directed RNA polymerase, sigma subunit (sigma 70/sigma32)                          | 451  |             | COG0568 | K   | TIGR02937           | No  | No |
| Pellet                                  | 2005608646 | pfam04539 pfam04545                               | DNA-directed RNA polymerase, sigma subunit (sigma 70/sigma32)                          | 160  |             | COG0568 | K   |                     | No  | No |
| Pellet                                  | 2005562063 |                                                   | DNA-directed RNA polymerase, subunit K/omega                                           | 71   |             |         |     |                     | No  | No |
| Pellet                                  | 2005592683 |                                                   | EF hand domain/PKD domain protein                                                      | 551  |             |         |     |                     | Yes | No |
| Pellet                                  | 2005569442 | pfam00766 pfam01012                               | Electron transfer flavoprotein, alpha subunit                                          | 337  |             | COG2025 | C   |                     | No  | No |
| Soluble                                 | 2005567730 | pfam00766                                         | Electron transfer flavoprotein, alpha subunit                                          | 130  |             | COG2025 | C   |                     | No  | No |
| Soluble                                 | 2005567736 | pfam00766 pfam01012                               | Electron transfer flavoprotein, alpha subunit                                          | 337  |             | COG2025 | C   |                     | No  | No |
| Pellet                                  | 2005584058 | pfam01012                                         | Electron transfer flavoprotein, beta subunit                                           | 273  |             | COG2086 | C   |                     | No  | No |
| Pellet / Insoluble                      | 2005560444 | pfam01012                                         | Electron transfer flavoprotein, beta subunit                                           | 264  |             | COG2086 | C   |                     | No  | No |
| Soluble                                 | 2005567731 | pfam01012                                         | Electron transfer flavoprotein, beta subunit                                           | 264  |             | COG2086 | C   |                     | No  | No |
| Supernatant                             | 2005593821 | pfam01012                                         | Electron transfer flavoprotein, beta subunit                                           | 235  |             | COG2086 | C   |                     | No  | No |
| Supernatant / Soluble                   | 2005566947 | pfam00150                                         | Endoglucanase                                                                          | 355  | EC:3.2.1.4  | COG2730 | G   |                     | No  | No |
| Global / Pellet / Soluble / Supernatant | 2005591060 | pfam00113 pfam03952                               | Enolase                                                                                | 316  | EC:4.2.1.11 | COG0148 | G   | TIGR01060           | No  | No |
| Global / Supernatant                    | 2005578806 | pfam00113                                         | Enolase                                                                                | 38   |             | COG0148 | G   |                     | No  | No |
| Insoluble                               | 2005568651 | pfam00113 pfam03952                               | Enolase                                                                                | 338  | EC:4.2.1.11 | COG0148 | G   | TIGR01060           | Yes | No |
| Insoluble                               | 2005578941 | pfam00113 pfam03952                               | Enolase                                                                                | 433  | EC:4.2.1.11 | COG0148 | G   | TIGR01060           | No  | No |
| Pellet                                  | 2005588664 | pfam00113 pfam03952                               | Enolase                                                                                | 345  | EC:4.2.1.11 | COG0148 | G   | TIGR01060           | Yes | No |
| Pellet                                  | 2005628837 | pfam00113 pfam03952                               | Enolase                                                                                | 261  |             | COG0148 | G   | TIGR01060           | Yes | No |
| Pellet / Soluble                        | 2005622641 | pfam00113                                         | Enolase                                                                                | 265  |             | COG0148 | G   | TIGR01060           | No  | No |
| Soluble                                 | 2005578060 |                                                   | Enoyl-[acyl-carrier-protein] reductase (NADH)                                          | 245  | EC:1.3.1.9  | COG0623 | I   |                     | No  | No |
| Global                                  | 2005577295 |                                                   | Enterochelin esterase and related enzymes                                              | 167  |             | COG2382 | P   |                     | No  | No |
| Supernatant                             | 2005593234 | pfam04551                                         | Enzyme involved in the deoxyxylulose pathway of isoprenoid biosynthesis                | 157  |             | COG0821 | I   | TIGR00612           | No  | No |
| Global                                  | 2005562006 |                                                   | Esterase/lipase                                                                        | 269  |             | COG0657 | I   |                     | Yes | No |
| Pellet / Soluble                        | 2005620547 | pfam06751                                         | Ethanolamine ammonia-lyase, large subunit                                              | 189  |             | COG4303 | E   |                     | No  | No |
| Pellet                                  | 2005591307 | pfam05985                                         | Ethanolamine ammonia-lyase, small subunit                                              | 78   |             | COG4302 | E   |                     | No  | No |
| Pellet                                  | 2005617886 | pfam05899                                         | Ethanolamine utilization protein                                                       | 153  |             | COG4766 | E   |                     | No  | No |
| Pellet                                  | 2005605559 | pfam06277                                         | Ethanolamine utilization protein, possible chaperonin protecting lyase from inhibition | 281  |             | COG4819 | E   |                     | No  | No |
| Pellet                                  | 2005618465 |                                                   | Exonuclease ATPase subunit                                                             | 275  |             | COG0178 | L   |                     | No  | No |
| Pellet                                  | 2005632576 | pfam03372                                         | Exonuclease III                                                                        | 196  | EC:3.1.11.2 | COG0708 | L   | TIGR00195 TIGR00633 | No  | No |
| Supernatant / Soluble                   | 2005613253 | pfam03372                                         | Exonuclease III                                                                        | 91   |             | COG0708 | L   |                     | No  | No |
| Global                                  | 2005610325 | pfam07523                                         | Exopolysaccharide lyase (EC 4.2.2.9)                                                   | 292  |             |         |     |                     | Yes | No |
| Supernatant                             | 2005614195 | pfam01966                                         | Exopolyphosphatase                                                                     | 233  |             | COG0248 | F P |                     | Yes | No |
| Soluble                                 | 2005584291 |                                                   | Exopolyphosphatase-related proteins                                                    | 196  |             | COG0618 | R   |                     | No  | No |
| Soluble                                 | 2005589106 |                                                   | Exopolyphosphatase-related proteins                                                    | 146  |             |         |     |                     | Yes | No |
| Soluble                                 | 2005619232 |                                                   | Exopolyphosphatase-related proteins                                                    | 232  |             | COG0618 | R   |                     | No  | No |
| Soluble / Supernatant                   | 2005605884 |                                                   | Exopolyphosphatase-related proteins                                                    | 81   |             | COG0618 | R   |                     | No  | No |
| Supernatant                             | 2005583227 | pfam01368 pfam02272                               | Exopolyphosphatase-related proteins                                                    | 332  |             | COG0618 | R   |                     | No  | No |
| Pellet                                  | 2005567655 | pfam00773                                         | Exoribonuclease R                                                                      | 509  | EC:3.1.13.1 | COG0557 | K   |                     | No  | No |
| Pellet / Soluble / Supernatant          | 200557713  | pfam00006 pfam09378                               | FOF1-type ATP synthase, alpha subunit                                                  | 293  |             | COG0056 | C   | TIGR00962           | No  | No |
| Pellet                                  | 2005571745 | pfam00006 pfam0306 pfam02874                      | FOF1-type ATP synthase, beta subunit                                                   | 465  | EC:3.6.3.14 | COG0055 | C   | TIGR01039           | No  | No |
| Pellet / Soluble                        | 2005577711 | pfam02874                                         | FOF1-type ATP synthase, beta subunit                                                   | 89   |             | COG0055 | C   |                     | No  | No |
| Pellet / Soluble                        | 2005561807 | pfam00006 pfam0306 pfam02874                      | FOF1-type ATP synthase, beta subunit                                                   | 460  | EC:3.6.3.15 | COG0055 | C   | TIGR01039           | No  | No |
| Pellet / Soluble                        | 2005629164 | pfam00006 pfam02874                               | FOF1-type ATP synthase, beta subunit                                                   | 265  |             | COG0055 | C   | TIGR01039           | No  | No |
| Soluble                                 | 2005560916 | pfam00006 pfam0306                                | FOF1-type ATP synthase, beta subunit                                                   | 302  |             | COG0055 | C   | TIGR01039           | No  | No |

|                                           |            |                               |                                                                   |     |             |         |     |           |     |     |
|-------------------------------------------|------------|-------------------------------|-------------------------------------------------------------------|-----|-------------|---------|-----|-----------|-----|-----|
| Soluble                                   | 2005564922 | pfam00006 pfam00306 pfam02874 | FOF1-type ATP synthase, beta subunit                              | 439 | EC:3.6.3.14 | COG0055 | C   | TIGR01039 | No  | No  |
| Pellet                                    | 2005563047 | pfam06574                     | FAD synthase                                                      | 194 |             | COG0196 | H   |           | No  | No  |
| Pellet                                    | 2005579118 | pfam01687 pfam06574           | FAD synthase                                                      | 288 | EC:2.7.1.26 | COG0196 | H   | TIGR00083 | No  | No  |
| Pellet                                    | 2005568111 |                               | Ferredoxin                                                        | 131 | EC:1.6.5.3  | COG3411 | C   |           | No  | No  |
| Pellet                                    | 2005585062 |                               | Ferredoxin                                                        | 131 | EC:1.6.5.3  | COG3411 | C   |           | No  | No  |
| Pellet / Soluble                          | 2005560273 |                               | Ferredoxin                                                        | 124 | EC:1.6.5.3  | COG3411 | C   |           | No  | No  |
| Pellet                                    | 2005610071 |                               | Ferredoxin 2                                                      | 282 |             | COG4624 | R   |           | No  | No  |
| Global                                    | 2005579708 | pfam10105                     | Fe-S oxidoreductase                                               | 269 |             | COG5011 | S   |           | No  | No  |
| Pellet                                    | 2005560777 | pfam08497                     | Fe-S oxidoreductase                                               | 180 |             | COG1032 | C   |           | No  | No  |
| Soluble                                   | 2005582220 | pfam04055 pfam10105           | Fe-S oxidoreductase                                               | 814 |             | COG1032 | C   |           | No  | No  |
| Soluble                                   | 2005585337 |                               | Fe-S oxidoreductase                                               | 217 |             | COG0635 | H   |           | No  | No  |
| Soluble                                   | 2005602873 | pfam04055                     | Fe-S oxidoreductase                                               | 277 |             | COG1032 | C   |           | Yes | No  |
| Pellet                                    | 2005562551 | pfam03748                     | Flagellar basal body-associated protein                           | 188 |             | COG1580 | N   |           | No  | Yes |
| Pellet                                    | 2005599636 | pfam03748                     | Flagellar basal body-associated protein                           | 163 |             | COG1580 | N   |           | No  | Yes |
| Soluble                                   | 2005611129 | pfam00771                     | Flagellar biosynthesis pathway, component FliA                    | 246 |             | COG1298 | U N |           | Yes | Yes |
| Supernatant                               | 2005619402 | pfam00771                     | Flagellar biosynthesis pathway, component FliA                    | 115 |             | COG1298 | N U |           | No  | Yes |
| Global                                    | 2005583126 | pfam01312                     | Flagellar biosynthesis pathway, component FliB                    | 238 |             | COG1377 | U N |           | No  | Yes |
| Pellet                                    | 2005602571 | pfam00006                     | Flagellar biosynthesis/type III secretory pathway ATPase          | 288 |             | COG1157 | U N | TIGR01026 | No  | No  |
| Pellet                                    | 2005583945 | pfam01514                     | Flagellar biosynthesis/type III secretory pathway lipoprotein     | 166 |             | COG1766 | U N |           | Yes | Yes |
| Pellet                                    | 2005595537 | pfam08345                     | Flagellar biosynthesis/type III secretory pathway lipoprotein     | 164 |             | COG1766 | N U |           | No  | Yes |
| Supernatant                               | 2005584740 | pfam01514                     | Flagellar biosynthesis/type III secretory pathway lipoprotein     | 377 |             | COG1766 | U N |           | Yes | Yes |
| Supernatant                               | 2005599439 | pfam01514                     | Flagellar biosynthesis/type III secretory pathway lipoprotein     | 236 |             | COG1766 | N U |           | Yes | No  |
| Global                                    | 2005582866 | pfam02108                     | Flagellar biosynthesis/type III secretory pathway protein         | 322 |             | COG1317 | U N |           | No  | No  |
| Pellet                                    | 2005607295 | pfam02108                     | Flagellar biosynthesis/type III secretory pathway protein         | 257 |             | COG1317 | U N |           | No  | No  |
| Pellet                                    | 2005583620 | pfam07195                     | Flagellar capping protein                                         | 508 |             | COG1345 | N   |           | No  | No  |
| Global                                    | 2005608029 | pfam04620                     | Flagellar filament outer layer protein                            | 265 |             |         |     |           | No  | No  |
| Soluble                                   | 2005599953 | pfam04620                     | Flagellar filament outer layer protein                            | 171 |             |         |     |           | No  | No  |
| Soluble                                   | 2005604073 | pfam04620                     | Flagellar filament outer layer protein                            | 220 |             |         |     |           | No  | No  |
| Global                                    | 2005565256 | pfam04620                     | Flagellar filament outer layer protein FlaA, putative             | 229 |             |         |     |           | No  | No  |
| Insoluble / Pellet                        | 2005574030 | pfam04620                     | Flagellar filament outer layer protein precursor (Sheath protein) | 126 |             |         |     |           | No  | No  |
| Soluble                                   | 2005599720 | pfam04620                     | Flagellar filament outer layer protein precursor (Sheath protein) | 283 |             |         |     |           | Yes | No  |
| Supernatant                               | 2005628888 | pfam04620                     | Flagellar filament outer layer protein precursor (Sheath protein) | 127 |             |         |     |           | No  | No  |
| Global / Insoluble / Pellet / Supernatant | 2005577291 | pfam00460 pfam07559           | Flagellar hook protein FlgE                                       | 398 |             | COG1749 | N   |           | No  | No  |
| Pellet                                    | 2005567159 | pfam00460                     | Flagellar hook protein FlgE                                       | 55  |             | COG1749 | N   |           | No  | No  |
| Pellet                                    | 2005574847 | pfam00460                     | Flagellar hook protein FlgE                                       | 470 |             | COG1749 | N   |           | No  | No  |
| Pellet                                    | 2005579616 | pfam06429 pfam07559           | Flagellar hook protein FlgE                                       | 202 |             | COG1749 | N   |           | Yes | No  |
| Pellet / Supernatant                      | 2005582006 | pfam00460                     | Flagellar hook protein FlgE                                       | 127 |             | COG1749 | N   |           | No  | No  |
| Pellet / Supernatant / Global             | 2005566082 | pfam06429                     | Flagellar hook protein FlgE                                       | 176 |             | COG1749 | N   |           | No  | No  |
| Pellet / Supernatant / Global             | 2005623258 | pfam06429 pfam07559           | Flagellar hook protein FlgE                                       | 217 |             | COG1749 | N   |           | No  | No  |
| Supernatant                               | 2005586340 | pfam00460 pfam07559           | Flagellar hook protein FlgE                                       | 357 |             | COG1749 | N   |           | No  | No  |
| Supernatant                               | 2005588010 | pfam06429 pfam07559           | Flagellar hook protein FlgE                                       | 273 |             | COG1749 | N   |           | No  | No  |
| Global                                    | 2005588008 | pfam01618                     | Flagellar motor component                                         | 260 |             | COG1291 | N   |           | Yes | Yes |
| Global                                    | 2005561349 | pfam01706                     | Flagellar motor switch protein                                    | 270 |             | COG1536 | N   | TIGR00207 | No  | No  |
| Global / Soluble                          | 2005582865 | pfam01706                     | Flagellar motor switch protein                                    | 355 |             | COG1536 | N   | TIGR00207 | No  | No  |
| Pellet                                    | 2005566215 | pfam01052 pfam02154           | Flagellar motor switch protein                                    | 202 |             | COG1868 | N   |           | No  | No  |
| Pellet                                    | 2005577183 | pfam02154                     | Flagellar motor switch protein                                    | 89  |             | COG1868 | N   |           | No  | No  |
| Pellet / Soluble                          | 2005562554 | pfam01052 pfam02154           | Flagellar motor switch protein                                    | 342 |             | COG1868 | N   | TIGR01397 | No  | No  |
| Soluble                                   | 2005594278 | pfam02154                     | Flagellar motor switch protein                                    | 147 |             | COG1868 | N   |           | No  | No  |
| Global                                    | 2005561971 | pfam01052                     | Flagellar motor switch/type III secretory pathway protein         | 255 |             | COG1886 | N U | TIGR02480 | No  | No  |
| Pellet / Soluble                          | 2005575269 | pfam01052                     | Flagellar motor switch/type III secretory pathway protein         | 134 |             | COG1886 | N U | TIGR02480 | Yes | No  |
| Global                                    | 2005569120 | pfam00669                     | Flagellin and related hook-associated proteins                    | 119 |             | COG1344 | N   |           | No  | No  |
| Global                                    | 2005571410 | pfam00669                     | Flagellin and related hook-associated proteins                    | 264 |             | COG1344 | N   |           | No  | No  |
| Global                                    | 2005577451 | pfam00700                     | Flagellin and related hook-associated proteins                    | 341 |             | COG1344 | N   |           | No  | No  |
| Global                                    | 2005579387 | pfam00700                     | Flagellin and related hook-associated proteins                    | 349 |             | COG1344 | N   |           | No  | No  |
| Global                                    | 2005581836 | pfam00700                     | Flagellin and related hook-associated proteins                    | 249 |             | COG1344 | N   |           | No  | No  |
| Global                                    | 2005582897 | pfam00669 pfam00700           | Flagellin and related hook-associated proteins                    | 258 |             | COG1344 | N   |           | No  | No  |
| Global                                    | 2005583767 | pfam00669                     | Flagellin and related hook-associated proteins                    | 199 |             | COG1344 | N   |           | No  | No  |
| Global                                    | 2005592455 | pfam00669                     | Flagellin and related hook-associated proteins                    | 178 |             | COG1344 | N   |           | No  | No  |
| Global                                    | 2005594217 | pfam00669 pfam00700           | Flagellin and related hook-associated proteins                    | 235 |             | COG1344 | N   |           | No  | No  |
| Global                                    | 2005611453 | pfam00669                     | Flagellin and related hook-associated proteins                    | 106 |             | COG1344 | N   |           | No  | No  |
| Global                                    | 2005631434 | pfam00669                     | Flagellin and related hook-associated proteins                    | 217 |             | COG1344 | N   |           | No  | No  |
| Global / Insoluble                        | 2005572009 | pfam00700                     | Flagellin and related hook-associated proteins                    | 250 |             | COG1344 | N   |           | No  | No  |
| Global / Insoluble                        | 2005590502 | pfam00669 pfam00700           | Flagellin and related hook-associated proteins                    | 216 |             | COG1344 | N   |           | No  | No  |
| Global / Insoluble / Pellet / Supernatant | 2005580359 | pfam00669                     | Flagellin and related hook-associated proteins                    | 202 |             | COG1344 | N   |           | No  | No  |
| Global / Insoluble / Soluble              | 2005577109 | pfam00669 pfam00700           | Flagellin and related hook-associated proteins                    | 270 |             | COG1344 | N   |           | No  | No  |
| Global / Pellet                           | 2005583080 | pfam00700                     | Flagellin and related hook-associated proteins                    | 99  |             | COG1344 | N   |           | No  | No  |
| Global / Pellet / Supernatant             | 2005569110 | pfam00669                     | Flagellin and related hook-associated proteins                    | 358 |             | COG1344 | N   |           | No  | No  |
| Global / Pellet / Supernatant             | 2005585736 | pfam00669 pfam00700           | Flagellin and related hook-associated proteins                    | 243 |             | COG1344 | N   |           | No  | No  |
| Global / Pellet / Supernatant             | 2005598263 | pfam00669                     | Flagellin and related hook-associated proteins                    | 118 |             | COG1344 | N   |           | No  | No  |
| Insoluble                                 | 2005570913 | pfam00669 pfam00700           | Flagellin and related hook-associated proteins                    | 290 |             | COG1344 | N   |           | No  | No  |
| Insoluble                                 | 2005574801 | pfam00669 pfam00700           | Flagellin and related hook-associated proteins                    | 285 |             | COG1344 | N   |           | No  | No  |
| Insoluble                                 | 2005586646 | pfam00669 pfam00700           | Flagellin and related hook-associated proteins                    | 286 |             | COG1344 | N   |           | No  | No  |
| Insoluble                                 | 2005615296 | pfam00669                     | Flagellin and related hook-associated proteins                    | 156 |             | COG1344 | N   |           | No  | No  |
| Insoluble                                 | 2005615783 | pfam00669                     | Flagellin and related hook-associated proteins                    | 127 |             | COG1344 | N   |           | No  | No  |
| Insoluble                                 | 2005616676 | pfam00700                     | Flagellin and related hook-associated proteins                    | 242 |             | COG1344 | N   |           | No  | No  |
| Insoluble / Global                        | 2005624996 | pfam00669                     | Flagellin and related hook-associated proteins                    | 136 |             | COG1344 | N   |           | No  | No  |
| Insoluble / Soluble                       | 2005574802 | pfam00669 pfam00700           | Flagellin and related hook-associated proteins                    | 255 |             | COG1344 | N   |           | No  | No  |
| Insoluble / Soluble                       | 2005580358 | pfam00669 pfam00700           | Flagellin and related hook-associated proteins                    | 280 |             | COG1344 | N   |           | No  | No  |
| Insoluble / Soluble                       | 2005595675 | pfam00669                     | Flagellin and related hook-associated proteins                    | 139 |             | COG1344 | N   |           | No  | No  |
| Insoluble / Soluble                       | 2005564339 | pfam00669 pfam00700           | Flagellin and related hook-associated proteins                    | 751 |             | COG1344 | N   |           | No  | No  |
| Insoluble / Soluble                       | 2005631695 | pfam00669                     | Flagellin and related hook-associated proteins                    | 213 |             | COG1344 | N   |           | No  | No  |
| Pellet                                    | 2005570099 | pfam00669                     | Flagellin and related hook-associated proteins                    | 120 |             | COG1344 | N   |           | No  | No  |
| Pellet                                    | 2005571732 | pfam00669 pfam00700           | Flagellin and related hook-associated proteins                    | 286 |             | COG1344 | N   |           | No  | No  |
| Pellet                                    | 2005586393 | pfam00669 pfam00700           | Flagellin and related hook-associated proteins                    | 179 |             | COG1344 | N   |           | No  | No  |
| Pellet                                    | 2005602492 | pfam00669 pfam00700           | Flagellin and related hook-associated proteins                    | 260 |             | COG1344 | N   |           | No  | No  |
| Pellet                                    | 2005605528 | pfam00669                     | Flagellin and related hook-associated proteins                    | 191 |             | COG1344 | N   |           | No  | No  |
| Pellet                                    | 2005618492 | pfam00700                     | Flagellin and related hook-associated proteins                    | 221 |             | COG1344 | N   |           | No  | No  |

|                                                     |            |                     |                                                |     |              |         |     |                     |     |     |
|-----------------------------------------------------|------------|---------------------|------------------------------------------------|-----|--------------|---------|-----|---------------------|-----|-----|
| Pellet                                              | 2005619477 | pfam00669           | Flagellin and related hook-associated proteins | 173 |              | COG1344 | N   |                     | No  | No  |
| Pellet                                              | 2005623826 | pfam00669           | Flagellin and related hook-associated proteins | 272 |              | COG1344 | N   |                     | No  | No  |
| Pellet                                              | 2005626569 | pfam00669 pfam00700 | Flagellin and related hook-associated proteins | 246 |              | COG1344 | N   |                     | No  | No  |
| Pellet / Insoluble                                  | 2005656574 | pfam00669 pfam00700 | Flagellin and related hook-associated proteins | 573 |              | COG1344 | N   |                     | No  | No  |
| Pellet / Soluble                                    | 2005598482 | pfam00669           | Flagellin and related hook-associated proteins | 140 |              | COG1344 | N   |                     | No  | No  |
| Pellet / Supernatant                                | 2005580184 | pfam00700           | Flagellin and related hook-associated proteins | 356 |              | COG1344 | N   |                     | No  | No  |
| Pellet / Supernatant                                | 2005581933 | pfam00669 pfam00700 | Flagellin and related hook-associated proteins | 776 |              | COG1344 | N   |                     | No  | No  |
| Pellet / Supernatant                                | 2005589149 | pfam00700           | Flagellin and related hook-associated proteins | 62  |              | COG1344 | N   |                     | No  | No  |
| Pellet / Supernatant                                | 2005603288 | pfam00669           | Flagellin and related hook-associated proteins | 111 |              | COG1344 | N   |                     | No  | No  |
| Pellet / Supernatant                                | 2005611422 | pfam00700           | Flagellin and related hook-associated proteins | 49  |              | COG1344 | N   |                     | No  | No  |
| Pellet / Supernatant / Global                       | 2005615537 | pfam00669           | Flagellin and related hook-associated proteins | 133 |              | COG1344 | N   |                     | No  | No  |
| Pellet / Supernatant / Global                       | 2005623632 | pfam00700           | Flagellin and related hook-associated proteins | 55  |              | COG1344 | N   |                     | No  | No  |
| Pellet / Supernatant / Global                       | 2005629363 | pfam00669 pfam00700 | Flagellin and related hook-associated proteins | 217 |              | COG1344 | N   |                     | No  | No  |
| Soluble                                             | 2005571456 | pfam00669 pfam00700 | Flagellin and related hook-associated proteins | 286 |              | COG1344 | N   |                     | No  | No  |
| Soluble                                             | 2005578776 | pfam00669           | Flagellin and related hook-associated proteins | 407 |              | COG1344 | N   |                     | No  | No  |
| Soluble                                             | 2005591933 | pfam00669 pfam00700 | Flagellin and related hook-associated proteins | 284 |              | COG1344 | N   |                     | No  | No  |
| Soluble / Global                                    | 2005623226 | pfam00669           | Flagellin and related hook-associated proteins | 138 |              | COG1344 | N   |                     | No  | No  |
| Supernatant                                         | 2005560496 | pfam00700           | Flagellin and related hook-associated proteins | 296 |              | COG1344 | N   |                     | No  | No  |
| Supernatant                                         | 2005589722 | pfam00669 pfam00700 | Flagellin and related hook-associated proteins | 206 |              | COG1344 | N   |                     | No  | No  |
| Supernatant                                         | 2005611420 | pfam00669 pfam00700 | Flagellin and related hook-associated proteins | 277 |              | COG1344 | N   |                     | No  | No  |
| Supernatant / Global                                | 2005565784 | pfam00669 pfam00700 | Flagellin and related hook-associated proteins | 284 |              | COG1344 | N   |                     | No  | No  |
| Global                                              | 2005623479 | pfam00437           | FliP pilus assembly protein, ATPase CpaF       | 220 |              | COG4962 | U   |                     | No  | No  |
| Global                                              | 2005567243 | pfam00563 pfam00990 | FOG                                            | 419 |              | COG2200 | T   | TIGR00254           | No  | No  |
| Global                                              | 2005621737 | pfam00072           | FOG                                            | 264 |              | COG0784 | T   |                     | No  | No  |
| Insoluble                                           | 2005605819 |                     | FOG                                            | 177 |              |         |     |                     | No  | No  |
| Insoluble                                           | 2005609775 |                     | FOG                                            | 256 |              | COG1413 | C   |                     | No  | No  |
| Insoluble / Supernatant                             | 2005577635 | pfam00072           | FOG                                            | 144 |              | COG4753 | T   |                     | No  | No  |
| Pellet                                              | 2005561426 |                     | FOG                                            | 654 |              |         |     |                     | No  | No  |
| Pellet                                              | 2005565228 | pfam00515           | FOG                                            | 499 |              | COG3063 | U N |                     | No  | No  |
| Pellet                                              | 2005569167 | pfam00072           | FOG                                            | 122 | EC:3.1.1.61  | COG2204 | T   |                     | No  | No  |
| Pellet                                              | 2005569863 |                     | FOG                                            | 261 |              |         |     |                     | No  | No  |
| Pellet                                              | 2005573193 | pfam00023           | FOG                                            | 810 |              | COG0666 | R   | TIGR01435           | No  | No  |
| Pellet                                              | 2005576171 | pfam00072           | FOG                                            | 128 |              | COG2204 | T   |                     | No  | No  |
| Pellet                                              | 2005581440 | pfam00478           | FOG                                            | 290 | EC:1.1.1.205 | COG0516 | F   | TIGR01302           | No  | No  |
| Pellet                                              | 2005587504 |                     | FOG                                            | 233 |              |         |     |                     | Yes | Yes |
| Pellet                                              | 2005591268 | pfam00515 pfam07719 | FOG                                            | 336 |              | COG3063 | N U |                     | No  | No  |
| Pellet                                              | 2005592114 | pfam00515 pfam07719 | FOG                                            | 515 |              | COG2956 | G   |                     | No  | No  |
| Pellet                                              | 2005594638 | pfam00072 pfam02518 | FOG                                            | 263 |              | COG0784 | T   |                     | No  | No  |
| Pellet                                              | 2005610827 | pfam00023           | FOG                                            | 156 |              | COG0666 | R   |                     | No  | No  |
| Pellet / Supernatant                                | 2005567085 | pfam00072           | FOG                                            | 121 |              | COG2204 | T   |                     | No  | No  |
| Soluble                                             | 2005569474 |                     | FOG                                            | 556 |              |         |     |                     | Yes | No  |
| Soluble                                             | 2005569653 | pfam00072           | FOG                                            | 128 |              | COG2204 | T   |                     | No  | No  |
| Soluble                                             | 2005584632 | pfam01609           | FOG                                            | 370 |              |         |     |                     | No  | No  |
| Soluble                                             | 2005587003 |                     | FOG                                            | 233 |              |         |     |                     | No  | No  |
| Soluble                                             | 2005592660 | pfam00072           | FOG                                            | 300 |              | COG3706 | T   |                     | No  | No  |
| Soluble                                             | 2005629285 | pfam00515 pfam07719 | FOG                                            | 237 |              | COG3063 | N U |                     | No  | No  |
| Supernatant                                         | 2005567671 | pfam00990           | FOG                                            | 430 |              | COG3706 | T   | TIGR00254           | No  | Yes |
| Supernatant                                         | 2005573668 | pfam00072           | FOG                                            | 118 | EC:3.1.1.61  | COG0745 | K T |                     | No  | No  |
| Supernatant                                         | 2005580655 | pfam00990 pfam01590 | FOG                                            | 662 |              | COG3706 | T   | TIGR00229 TIGR00254 | No  | No  |
| Supernatant                                         | 2005591458 | pfam00563 pfam10388 | FOG                                            | 400 |              | COG2200 | T   |                     | No  | No  |
| Supernatant                                         | 2005595933 | pfam00072           | FOG                                            | 63  |              | COG4753 | T   |                     | No  | No  |
| Supernatant                                         | 2005600689 |                     | FOG                                            | 209 |              |         |     |                     | No  | No  |
| Supernatant                                         | 2005623793 | pfam09479           | FOG                                            | 260 |              |         |     | TIGR02543           | No  | No  |
| Supernatant                                         | 2005625242 | pfam08238           | FOG                                            | 103 |              | COG0790 | R   |                     | No  | No  |
| Supernatant / Soluble                               | 2005567782 | pfam08238           | FOG                                            | 234 |              | COG0790 | R   |                     | No  | No  |
| Pellet                                              | 2005628630 | pfam02875 pfam08245 | Folypolyglutamate synthase                     | 262 |              | COG0285 | H   | TIGR01499           | Yes | No  |
| Supernatant                                         | 2005561280 | pfam02875 pfam08245 | Folypolyglutamate synthase                     | 423 | EC:6.3.2.17  | COG0285 | H   | TIGR01499           | No  | No  |
| Global / Insoluble / Pellet / Soluble / Supernatant | 2005581342 | pfam01268           | Formyltetrahydrofolate synthetase              | 276 |              | COG2759 | F   |                     | No  | No  |
| Pellet                                              | 2005561832 | pfam01268           | Formyltetrahydrofolate synthetase              | 375 |              | COG2759 | F   |                     | No  | No  |
| Soluble                                             | 2005572584 | pfam01268           | Formyltetrahydrofolate synthetase              | 514 | EC:6.3.4.3   | COG2759 | F   |                     | No  | No  |
| Soluble                                             | 2005581893 | pfam01268           | Formyltetrahydrofolate synthetase              | 359 |              | COG2759 | F   |                     | No  | No  |
| Supernatant                                         | 2005582940 | pfam01268           | Formyltetrahydrofolate synthetase              | 572 | EC:6.3.4.3   | COG2759 | F   |                     | No  | No  |
| Global                                              | 2005617512 | pfam01116           | Fructose/tagatose biphosphate aldolase         | 101 |              | COG0191 | G   |                     | No  | No  |
| Global                                              | 2005622255 | pfam01116           | Fructose/tagatose biphosphate aldolase         | 183 |              | COG0191 | G   |                     | No  | No  |
| Global / Insoluble                                  | 2005585661 | pfam01116           | Fructose/tagatose biphosphate aldolase         | 102 |              | COG0191 | G   |                     | No  | No  |
| Global / Soluble                                    | 2005608363 | pfam01116           | Fructose/tagatose biphosphate aldolase         | 278 | EC:4.1.2.13  | COG0191 | G   | TIGR00167 TIGR01859 | No  | No  |
| Insoluble                                           | 2005562835 | pfam01116           | Fructose/tagatose biphosphate aldolase         | 332 | EC:4.1.2.13  | COG0191 | G   | TIGR00167 TIGR01859 | No  | No  |
| Pellet                                              | 2005621129 | pfam01116           | Fructose/tagatose biphosphate aldolase         | 208 |              | COG0191 | G   |                     | No  | No  |
| Pellet                                              | 2005627089 | pfam01116           | Fructose/tagatose biphosphate aldolase         | 189 |              | COG0191 | G   |                     | No  | No  |
| Pellet / Soluble                                    | 2005622273 | pfam01116           | Fructose/tagatose biphosphate aldolase         | 206 |              | COG0191 | G   | TIGR01520           | No  | No  |
| Pellet / Soluble                                    | 2005591009 |                     | Gamma-glutamyl phosphate reductase             | 402 | EC:1.2.1.41  | COG0014 | E   | TIGR00407           | No  | No  |
| Supernatant                                         | 2005571629 |                     | Gamma-glutamyl phosphate reductase             | 402 | EC:1.2.1.41  | COG0014 | E   | TIGR00407           | No  | No  |
| Pellet                                              | 2005572560 | pfam04952           | GH3978 protein                                 | 314 |              | COG3608 | R   |                     | No  | No  |
| Global                                              | 2005568461 | pfam00343           | Glucan phosphorylase                           | 696 | EC:2.4.1.1   | COG0058 | G   | TIGR02094           | No  | No  |
| Global                                              | 2005590718 | pfam00343           | Glucan phosphorylase                           | 474 |              | COG0058 | G   | TIGR02093           | No  | No  |
| Global / Soluble                                    | 2005569444 | pfam00343           | Glucan phosphorylase                           | 492 |              | COG0058 | G   | TIGR02094           | No  | No  |
| Insoluble                                           | 2005571490 | pfam00343           | Glucan phosphorylase                           | 788 | EC:2.4.1.1   | COG0058 | G   | TIGR02094           | No  | No  |
| Pellet                                              | 2005570245 |                     | Glucan phosphorylase                           | 282 |              | COG0058 | G   | TIGR02094           | No  | No  |
| Pellet                                              | 2005571446 | pfam00343           | Glucan phosphorylase                           | 576 |              | COG0058 | G   | TIGR02094           | No  | No  |
| Pellet                                              | 2005577445 | pfam00343           | Glucan phosphorylase                           | 788 | EC:2.4.1.1   | COG0058 | G   | TIGR02094           | No  | No  |
| Pellet                                              | 2005579314 |                     | Glucan phosphorylase                           | 153 |              |         |     |                     | No  | No  |
| Pellet                                              | 2005608263 |                     | Glucan phosphorylase                           | 272 |              | COG0058 | G   | TIGR02094           | No  | No  |
| Pellet / Soluble                                    | 2005565446 |                     | Glucan phosphorylase                           | 486 |              | COG0058 | G   | TIGR02094           | No  | No  |
| Pellet / Supernatant                                | 2005580113 | pfam00343           | Glucan phosphorylase                           | 500 |              | COG0058 | G   | TIGR02093           | No  | No  |
| Pellet / Supernatant                                | 2005580915 |                     | Glucan phosphorylase                           | 463 |              | COG0058 | G   | TIGR02094           | No  | No  |
| Pellet / Supernatant                                | 2005566092 |                     | Glucan phosphorylase                           | 486 |              | COG0058 | G   | TIGR02094           | No  | No  |
| Soluble                                             | 2005561253 | pfam00343           | Glucan phosphorylase                           | 421 |              | COG0058 | G   | TIGR02094           | No  | No  |



|                                |            |                               |                                                                               |     |             |         |   |                               |     |     |
|--------------------------------|------------|-------------------------------|-------------------------------------------------------------------------------|-----|-------------|---------|---|-------------------------------|-----|-----|
| Soluble                        | 2005621754 |                               | Glucan phosphorylase                                                          | 211 |             | COG0058 | G | TIGR02094                     | No  | No  |
| Supernatant                    | 2005569504 |                               | Glucan phosphorylase                                                          | 447 |             | COG0058 | G | TIGR02094                     | No  | No  |
| Supernatant                    | 2005616356 |                               | Glucan phosphorylase                                                          | 268 |             | COG0058 | G | TIGR02094                     | No  | No  |
| Supernatant                    | 2005632564 |                               | Glucan phosphorylase                                                          | 260 |             | COG0058 | G | TIGR02094                     | No  | No  |
| Supernatant / Global           | 2005565929 | pfam00343                     | Glucan phosphorylase                                                          | 615 |             | COG0058 | G | TIGR02094                     | No  | No  |
| Soluble                        | 2005560401 | pfam02685                     | Glucokinase                                                                   | 151 |             | COG0837 | G |                               | No  | No  |
| Global / Insoluble             | 2005581307 | pfam00342                     | Glucose-6-phosphate isomerase                                                 | 487 | EC:5.3.1.9  | COG0166 | G |                               | No  | No  |
| Global / Soluble / Supernatant | 2005593505 | pfam00342                     | Glucose-6-phosphate isomerase                                                 | 235 |             | COG0166 | G |                               | No  | No  |
| Pellet / Soluble               | 2005566406 | pfam00342                     | Glucose-6-phosphate isomerase                                                 | 375 |             | COG0166 | G |                               | No  | No  |
| Pellet / Soluble / Supernatant | 2005585789 | pfam00342                     | Glucose-6-phosphate isomerase                                                 | 265 |             | COG0166 | G |                               | No  | No  |
| Pellet / Supernatant           | 2005591804 | pfam00342                     | Glucose-6-phosphate isomerase                                                 | 527 | EC:5.3.1.9  | COG0166 | G |                               | No  | No  |
| Pellet / Supernatant / Soluble | 2005633278 | pfam00342                     | Glucose-6-phosphate isomerase                                                 | 255 |             | COG0166 | G |                               | No  | No  |
| Soluble                        | 2005566256 | pfam00342                     | Glucose-6-phosphate isomerase                                                 | 524 | EC:5.3.1.9  | COG0166 | G |                               | No  | No  |
| Soluble / Supernatant          | 2005603395 | pfam00342                     | Glucose-6-phosphate isomerase                                                 | 235 |             | COG0166 | G |                               | No  | No  |
| Soluble / Supernatant          | 2005607957 | pfam00342                     | Glucose-6-phosphate isomerase                                                 | 239 |             | COG0166 | G |                               | No  | No  |
| Supernatant                    | 2005561632 | pfam00342                     | Glucose-6-phosphate isomerase                                                 | 80  |             | COG0166 | G |                               | No  | No  |
| Supernatant                    | 2005564519 | pfam00342                     | Glucose-6-phosphate isomerase                                                 | 451 | EC:5.3.1.9  | COG0166 | G |                               | No  | No  |
| Supernatant                    | 2005581483 | pfam00342                     | Glucose-6-phosphate isomerase                                                 | 420 | EC:5.3.1.9  | COG0166 | G |                               | No  | No  |
| Supernatant                    | 2005601920 | pfam00342                     | Glucose-6-phosphate isomerase                                                 | 280 |             | COG0166 | G |                               | No  | No  |
| Supernatant                    | 2005630734 | pfam00342                     | Glucose-6-phosphate isomerase                                                 | 254 |             | COG0166 | G |                               | No  | No  |
| Supernatant / Global           | 2005561633 | pfam00342                     | Glucose-6-phosphate isomerase                                                 | 282 |             | COG0166 | G |                               | Yes | No  |
| Supernatant / Soluble          | 2005560821 | pfam00342                     | Glucose-6-phosphate isomerase                                                 | 248 |             | COG0166 | G |                               | No  | No  |
| Pellet                         | 2005561197 | pfam07470                     | Glucuronyl hydrolase, putative                                                | 169 |             |         |   |                               | No  | No  |
| Pellet                         | 2005604189 | pfam00696                     | Glutamate 5-kinase                                                            | 238 | EC:2.7.2.11 | COG0263 | E | TIGR01027                     | No  | No  |
| Global                         | 2005565685 | pfam00208 pfam02812           | Glutamate dehydrogenase/leucine dehydrogenase                                 | 338 | EC:1.4.1.4  | COG0334 | E |                               | No  | No  |
| Global                         | 2005586512 | pfam00208 pfam02812           | Glutamate dehydrogenase/leucine dehydrogenase                                 | 443 | EC:1.4.1.4  | COG0334 | E |                               | No  | No  |
| Global / Insoluble             | 2005569706 | pfam00208 pfam02812           | Glutamate dehydrogenase/leucine dehydrogenase                                 | 389 | EC:1.4.1.4  | COG0334 | E |                               | No  | No  |
| Global / Soluble               | 2005595490 | pfam00208 pfam02812           | Glutamate dehydrogenase/leucine dehydrogenase                                 | 443 | EC:1.4.1.4  | COG0334 | E |                               | No  | No  |
| Pellet                         | 2005567704 | pfam00208                     | Glutamate dehydrogenase/leucine dehydrogenase                                 | 128 |             | COG0334 | E |                               | No  | No  |
| Pellet                         | 2005586731 | pfam00208 pfam02812           | Glutamate dehydrogenase/leucine dehydrogenase                                 | 306 | EC:1.4.1.2  | COG0334 | E |                               | No  | No  |
| Soluble                        | 2005618300 | pfam00208 pfam02812           | Glutamate dehydrogenase/leucine dehydrogenase                                 | 257 |             | COG0334 | E |                               | No  | No  |
| Supernatant / Soluble          | 2005630732 | pfam00208                     | Glutamate dehydrogenase/leucine dehydrogenase                                 | 92  |             | COG0334 | E |                               | No  | No  |
| Soluble                        | 2005569559 | pfam01177                     | Glutamate racemase                                                            | 257 | EC:5.1.1.3  | COG0796 | M | TIGR00067                     | No  | No  |
| Supernatant                    | 2005570776 | pfam01177                     | Glutamate racemase                                                            | 269 | EC:5.1.1.3  | COG0796 | M | TIGR00067                     | No  | No  |
| Pellet                         | 2005561800 | pfam00310                     | Glutamate synthase domain 1                                                   | 285 | EC:1.4.1.13 | COG0067 | E |                               | No  | Yes |
| Pellet                         | 2005564469 | pfam00310                     | Glutamate synthase domain 1                                                   | 376 | EC:1.4.1.13 | COG0067 | E |                               | No  | No  |
| Pellet                         | 2005631832 |                               | Glutamate synthase domain 1                                                   | 276 |             | COG0067 | E |                               | No  | No  |
| Global                         | 2005587228 | pfam01645                     | Glutamate synthase domain 2                                                   | 530 | EC:1.4.1.13 | COG0069 | E |                               | No  | No  |
| Global / Soluble               | 2005577193 |                               | Glutamate synthase domain 2                                                   | 255 |             | COG0069 | E |                               | No  | No  |
| Pellet                         | 2005570735 | pfam01645                     | Glutamate synthase domain 2                                                   | 143 |             | COG0069 | E |                               | No  | No  |
| Pellet                         | 2005581279 | pfam00037 pfam01645           | Glutamate synthase domain 2                                                   | 501 | EC:1.4.1.13 | COG0069 | E |                               | No  | No  |
| Soluble                        | 2005619315 |                               | Glutamate synthase domain 2                                                   | 190 |             | COG0069 | E |                               | No  | No  |
| Supernatant                    | 2005577468 | pfam00037 pfam01645           | Glutamate synthase domain 2                                                   | 376 |             | COG0069 | E |                               | No  | No  |
| Supernatant / Soluble          | 2005560894 | pfam00037 pfam01645           | Glutamate synthase domain 2                                                   | 501 | EC:1.4.1.13 | COG0069 | E |                               | No  | No  |
| Supernatant / Soluble / Global | 2005561262 | pfam01645                     | Glutamate synthase domain 2                                                   | 335 |             | COG0069 | E |                               | No  | No  |
| Soluble                        | 2005609164 | pfam00117                     | Glutamine amidotransferase                                                    | 143 |             | COG0118 | E | TIGR01855                     | No  | No  |
| Soluble                        | 2005571403 | pfam00156 pfam00310           | Glutamine phosphoribosylpyrophosphate amidotransf erase                       | 406 | EC:2.4.2.14 | COG0034 | F | TIGR01134                     | No  | No  |
| Insoluble                      | 2005589589 | pfam00749 pfam03950           | Glutamyl- and glutaminyl-tRNA synthetases                                     | 274 |             | COG0008 | J |                               | No  | No  |
| Soluble                        | 2005567148 | pfam00749                     | Glutamyl- and glutaminyl-tRNA synthetases                                     | 441 | EC:6.1.1.17 | COG0008 | J | TIGR00464                     | No  | No  |
| Soluble                        | 2005568643 | pfam00749 pfam03950           | Glutamyl- and glutaminyl-tRNA synthetases                                     | 576 | EC:6.1.1.18 | COG0008 | J | TIGR00440                     | No  | No  |
| Soluble                        | 2005592378 | pfam00749                     | Glutamyl- and glutaminyl-tRNA synthetases                                     | 299 |             | COG0008 | J | TIGR00464                     | No  | No  |
| Supernatant                    | 2005568645 | pfam00749                     | Glutamyl- and glutaminyl-tRNA synthetases                                     | 329 |             | COG0008 | J | TIGR00464                     | No  | No  |
| Supernatant                    | 2005629012 | pfam00749                     | Glutamyl- and glutaminyl-tRNA synthetases                                     | 264 |             | COG0008 | J |                               | Yes | No  |
| Global / Insoluble / Soluble   | 2005596791 | pfam02800                     | Glyceraldehyde-3-phosphate dehydrogenase/erythros e-4-phosphate dehydrogenase | 177 |             | COG0057 | G | TIGR01534                     | No  | No  |
| Insoluble                      | 2005586540 | pfam00044 pfam02800           | Glyceraldehyde-3-phosphate dehydrogenase/erythros e-4-phosphate dehydrogenase | 270 | EC:1.2.1.12 | COG0057 | G | TIGR01534                     | No  | No  |
| Pellet / Supernatant           | 2005574479 | pfam00044 pfam02800           | Glyceraldehyde-3-phosphate dehydrogenase/erythros e-4-phosphate dehydrogenase | 265 | EC:1.2.1.12 | COG0057 | G | TIGR01534                     | No  | No  |
| Supernatant / Insoluble        | 2005567814 | pfam00044 pfam02800           | Glyceraldehyde-3-phosphate dehydrogenase/erythros e-4-phosphate dehydrogenase | 207 |             | COG0057 | G | TIGR01534                     | No  | No  |
| Soluble                        | 2005597044 | pfam00370                     | Glycerol kinase                                                               | 74  |             | COG0554 | C |                               | No  | No  |
| Global                         | 2005575758 | pfam01210 pfam07479           | Glycerol-3-phosphate dehydrogenase                                            | 290 | EC:1.1.1.94 | COG0240 | C |                               | No  | No  |
| Pellet                         | 2005566278 | pfam01210 pfam07479           | Glycerol-3-phosphate dehydrogenase                                            | 374 | EC:1.1.1.94 | COG0240 | C |                               | No  | No  |
| Soluble                        | 2005596764 | pfam01597                     | Glycine cleavage system H protein (lipoate-bindin g)                          | 49  |             | COG0509 | E |                               | No  | No  |
| Supernatant                    | 2005596335 | pfam01597                     | Glycine cleavage system H protein (lipoate-bindin g)                          | 122 | EC:1.4.4.2  | COG0509 | E | TIGR00527                     | No  | No  |
| Soluble                        | 2005565077 | pfam01571 pfam08669           | Glycine cleavage system T protein (aminomethyltra nsferase)                   | 262 |             | COG0404 | E | TIGR00528                     | No  | No  |
| Global / Soluble               | 2005587054 | pfam00464                     | Glycine/serine hydroxymethyltransferase                                       | 254 |             | COG0112 | E |                               | No  | No  |
| Pellet                         | 2005574422 | pfam00464                     | Glycine/serine hydroxymethyltransferase                                       | 145 |             | COG0112 | E |                               | No  | No  |
| Soluble                        | 2005568784 | pfam00464                     | Glycine/serine hydroxymethyltransferase                                       | 269 |             | COG0112 | E |                               | No  | No  |
| Soluble                        | 2005569677 | pfam00464                     | Glycine/serine hydroxymethyltransferase                                       | 283 |             | COG0112 | E |                               | No  | No  |
| Soluble                        | 2005574194 | pfam00464                     | Glycine/serine hydroxymethyltransferase                                       | 188 |             | COG0112 | E |                               | No  | No  |
| Soluble                        | 2005578391 | pfam00464                     | Glycine/serine hydroxymethyltransferase                                       | 333 | EC:2.1.2.1  | COG0112 | E |                               | No  | No  |
| Soluble / Supernatant          | 2005569334 | pfam00464                     | Glycine/serine hydroxymethyltransferase                                       | 262 |             | COG0112 | E |                               | Yes | No  |
| Soluble / Supernatant          | 2005573887 | pfam00464                     | Glycine/serine hydroxymethyltransferase                                       | 247 |             | COG0112 | E |                               | No  | No  |
| Supernatant                    | 2005565835 | pfam00464                     | Glycine/serine hydroxymethyltransferase                                       | 297 |             | COG0112 | E |                               | No  | No  |
| Supernatant                    | 2005569044 | pfam00464                     | Glycine/serine hydroxymethyltransferase                                       | 135 |             | COG0112 | E |                               | No  | No  |
| Pellet                         | 2005602325 | pfam00534 pfam08323           | Glycogen synthase                                                             | 283 |             | COG0297 | G | TIGR02095                     | No  | No  |
| Pellet                         | 2005605694 | pfam00534                     | Glycogen synthase                                                             | 202 |             | COG0297 | G |                               | No  | No  |
| Pellet / Supernatant           | 2005595015 | pfam00128                     | Glycosidases                                                                  | 286 |             | COG0366 | G |                               | No  | No  |
| Global                         | 2005568107 | pfam00534                     | Glycosyltransferase                                                           | 367 |             | COG0438 | M |                               | No  | No  |
| Pellet / Soluble               | 2005604053 | pfam00534                     | Glycosyltransferase                                                           | 200 |             | COG0438 | M |                               | No  | No  |
| Global                         | 2005593906 | pfam00535                     | Glycosyltransferases, probably involved in cell w all biogenesis              | 236 |             | COG1215 | M |                               | No  | No  |
| Global                         | 2005560140 | pfam00587 pfam03129           | Glycyl-tRNA synthetase (class II)                                             | 458 | EC:6.1.1.14 | COG0423 | J | TIGR00389                     | No  | No  |
| Global / Soluble / Supernatant | 2005589375 | pfam00587                     | Glycyl-tRNA synthetase (class II)                                             | 280 |             | COG0423 | J | TIGR00389                     | No  | No  |
| Pellet / Soluble               | 2005566677 | pfam00587 pfam03129           | Glycyl-tRNA synthetase (class II)                                             | 334 |             | COG0423 | J | TIGR00389                     | No  | No  |
| Soluble                        | 2005562039 | pfam00587 pfam03129           | Glycyl-tRNA synthetase (class II)                                             | 456 | EC:6.1.1.14 | COG0423 | J | TIGR00389                     | No  | No  |
| Soluble                        | 2005561114 | pfam00205 pfam02776           | Glyoxylate carboligase                                                        | 286 |             | COG3960 | R |                               | No  | No  |
| Global                         | 2005572419 |                               | Growth inhibitor                                                              | 113 |             | COG2337 | T |                               | No  | No  |
| Supernatant                    | 2005567647 | pfam01926                     | GTPases                                                                       | 374 | EC:3.1.5.-  | COG2262 | R | TIGR00231 TIGR03156 TIGR00650 | No  | No  |
| Global                         | 2005581788 | pfam00009 pfam03143 pfam03144 | GTPases - translation elongation factors                                      | 396 | EC:3.6.5.3  | COG0050 | J | TIGR00485 TIGR00231           | No  | No  |

|                                            |            |                               |                                                                                      |      |             |         |     |                     |     |     |
|--------------------------------------------|------------|-------------------------------|--------------------------------------------------------------------------------------|------|-------------|---------|-----|---------------------|-----|-----|
| Global                                     | 2005626517 | pfam00009                     | GTPases - translation elongation factors                                             | 164  |             | COG0050 | J   | TIGR00231 TIGR00485 | No  | No  |
| Insoluble                                  | 2005563237 | pfam00009 pfam03143 pfam03144 | GTPases - translation elongation factors                                             | 296  | EC:3.6.5.3  | COG0050 | J   | TIGR00485           | No  | No  |
| Insoluble / Pellet / Soluble / Supernatant | 2005597781 | pfam00009                     | GTPases - translation elongation factors                                             | 160  |             | COG0050 | J   | TIGR00231 TIGR00485 | Yes | No  |
| Pellet                                     | 2005599227 | pfam00009 pfam03144           | GTPases - translation elongation factors                                             | 258  |             | COG0050 | J   | TIGR00231 TIGR00485 | No  | No  |
| Pellet                                     | 2005604349 | pfam03143 pfam03144           | GTPases - translation elongation factors                                             | 127  |             | COG0050 | J   |                     | No  | No  |
| Pellet                                     | 2005618592 | pfam00009                     | GTPases - translation elongation factors                                             | 221  |             | COG0050 | J   | TIGR00231 TIGR00485 | No  | No  |
| Pellet / Soluble                           | 2005589254 | pfam03143 pfam03144           | GTPases - translation elongation factors                                             | 134  |             | COG0050 | J   |                     | No  | No  |
| Pellet / Supernatant / Soluble             | 2005626671 | pfam00009 pfam03144           | GTPases - translation elongation factors                                             | 228  |             | COG0050 | J   | TIGR00485           | No  | No  |
| Soluble                                    | 2005599446 | pfam00009                     | GTPases - translation elongation factors                                             | 115  |             | COG0050 | J   |                     | No  | No  |
| Supernatant / Global                       | 2005613118 | pfam00009                     | GTPases - translation elongation factors                                             | 210  |             | COG0050 | J   | TIGR00485 TIGR00231 | No  | No  |
| Supernatant / Soluble                      | 2005615797 | pfam03143 pfam03144           | GTPases - translation elongation factors                                             | 182  |             | COG0050 | J   | TIGR00485           | No  | No  |
| Global                                     | 2005609990 |                               | Guanosine polyphosphate pyrophosphohydrolases/syn thetases                           | 271  |             | COG0317 | K T |                     | No  | No  |
| Pellet                                     | 2005560582 | pfam01966                     | HD-GYP domain                                                                        | 397  |             | COG2206 | T   |                     | No  | No  |
| Pellet                                     | 2005565851 | pfam01966                     | HD-GYP domain                                                                        | 163  |             | COG2206 | T   |                     | No  | No  |
| Pellet                                     | 2005588658 | pfam01966                     | HD-GYP domain                                                                        | 317  |             | COG3437 | T K |                     | No  | No  |
| Supernatant                                | 2005623365 | pfam01814                     | Hemerythrin                                                                          | 161  |             | COG2703 | P   | TIGR02481           | No  | No  |
| Soluble                                    | 2005603332 | pfam07244                     | Hemolysin activation/secretion protein                                               | 276  |             | COG2831 | U   |                     | No  | No  |
| Supernatant                                | 2005594468 | pfam00571                     | Hemolysins and related proteins containing CBS do mains                              | 293  |             | COG1253 | R   |                     | No  | Yes |
| Insoluble                                  | 2005620096 | pfam00037                     | Heterodisulfide reductase, subunit A and related polyferredoxins                     | 215  |             | COG1148 | C   |                     | No  | No  |
| Supernatant / Soluble                      | 2005565549 | pfam00349 pfam03727           | Hexokinase                                                                           | 469  | EC:2.7.1.1  | COG5026 | G   |                     | No  | No  |
| Pellet                                     | 2005614929 | pfam00221                     | Histidine ammonia-lyase                                                              | 280  |             | COG2986 | E   |                     | No  | No  |
| Pellet                                     | 2005590721 | pfam00815                     | Histidinol dehydrogenase                                                             | 324  | EC:1.1.1.23 | COG0141 | E   | TIGR00069           | No  | No  |
| Pellet                                     | 2005615437 | pfam00815                     | Histidinol dehydrogenase                                                             | 296  |             | COG0141 | E   | TIGR00069           | No  | No  |
| Supernatant                                | 2005566135 | pfam00815                     | Histidinol dehydrogenase                                                             | 376  | EC:1.1.1.23 | COG0141 | E   | TIGR00069           | No  | No  |
| Pellet                                     | 2005604781 | pfam02811                     | Histidinol phosphatase and related hydrolases of the PHP family                      | 238  | EC:3.1.3.15 | COG1387 | R E | TIGR01856           | No  | No  |
| Pellet / Soluble                           | 200565485  | pfam00587 pfam03129           | Histidyl-tRNA synthetase                                                             | 438  | EC:6.1.1.21 | COG0124 | J   | TIGR00442           | No  | No  |
| Soluble                                    | 2005569039 | pfam00587                     | Histidyl-tRNA synthetase                                                             | 450  | EC:6.1.1.21 | COG0124 | J   | TIGR00442           | No  | No  |
| Global                                     | 2005602507 | pfam02075                     | Holliday junction resolvosome, endonuclease subun it                                 | 140  |             | COG0817 | L   | TIGR00228           | No  | No  |
| Pellet                                     | 2005596276 | pfam02075                     | Holliday junction resolvosome, endonuclease subun it                                 | 164  | EC:3.1.22.4 | COG0817 | L   | TIGR00228           | No  | No  |
| Pellet                                     | 2005561685 | pfam00004 pfam05491           | Holliday junction resolvosome, helicase subunit                                      | 293  | EC:3.6.1.-  | COG2255 | L   | TIGR00635           | No  | No  |
| Soluble                                    | 2005562179 | pfam00742 pfam03447           | Homoserine dehydrogenase                                                             | 296  |             | COG0460 | E   |                     | No  | No  |
| Soluble                                    | 2005600181 | pfam00368                     | Hydroxymethylglutaryl-CoA reductase                                                  | 199  |             | COG1257 | I   |                     | No  | No  |
| Pellet                                     | 2005601971 | pfam10544                     | Hypothetical adenine-specific methylase MPN198 (E C 2.1.1.72) (M.MpnIP) (GT9_or319V) | 280  |             |         |     |                     | No  | No  |
| Global / Soluble                           | 2005573068 |                               | Hypothetical lipoprotein FN1590                                                      | 358  |             |         |     |                     | No  | No  |
| Insoluble / Supernatant                    | 2005585359 |                               | Hypothetical lipoprotein FN1590                                                      | 316  |             |         |     |                     | No  | No  |
| Global / Insoluble / Soluble               | 2005592594 |                               | Hypothetical lipoprotein FN1899                                                      | 386  |             |         |     |                     | No  | No  |
| Insoluble                                  | 2005580631 |                               | Hypothetical lipoprotein FN1899                                                      | 408  |             |         |     |                     | Yes | No  |
| Global                                     | 2005567473 |                               | Hypothetical protein                                                                 | 287  |             |         |     |                     | Yes | No  |
| Global                                     | 2005573550 |                               | Hypothetical protein                                                                 | 426  |             |         |     |                     | No  | No  |
| Global                                     | 2005582442 |                               | Hypothetical protein                                                                 | 127  |             |         |     |                     | No  | No  |
| Global                                     | 2005615937 |                               | Hypothetical protein                                                                 | 113  |             |         |     | TIGR01784           | No  | No  |
| Global / Pellet                            | 2005569824 |                               | Hypothetical protein                                                                 | 361  |             |         |     |                     | No  | No  |
| Global / Pellet                            | 2005576746 | pfam00639                     | Hypothetical protein                                                                 | 287  |             |         |     |                     | No  | No  |
| Pellet                                     | 2005563333 | pfam03993                     | Hypothetical protein                                                                 | 309  |             |         |     |                     | No  | No  |
| Pellet                                     | 2005564388 |                               | Hypothetical protein                                                                 | 190  |             |         |     |                     | No  | No  |
| Pellet                                     | 2005565158 |                               | Hypothetical protein                                                                 | 1332 |             |         |     |                     | No  | No  |
| Pellet                                     | 2005567874 |                               | Hypothetical protein                                                                 | 109  |             |         |     |                     | No  | No  |
| Pellet                                     | 2005568028 |                               | Hypothetical protein                                                                 | 101  |             |         |     |                     | No  | No  |
| Pellet                                     | 2005583087 |                               | Hypothetical protein                                                                 | 151  |             |         |     |                     | No  | No  |
| Pellet                                     | 2005588982 |                               | Hypothetical protein                                                                 | 447  |             |         |     |                     | No  | No  |
| Pellet                                     | 2005597408 |                               | Hypothetical protein                                                                 | 278  |             |         |     |                     | Yes | No  |
| Pellet                                     | 2005598128 |                               | Hypothetical protein                                                                 | 178  |             |         |     |                     | Yes | No  |
| Pellet                                     | 2005609263 |                               | Hypothetical protein                                                                 | 266  |             |         |     |                     | No  | No  |
| Pellet                                     | 2005612599 |                               | Hypothetical protein                                                                 | 93   |             |         |     |                     | No  | No  |
| Pellet                                     | 2005613590 | pfam00441 pfam01756           | Hypothetical protein                                                                 | 275  |             |         |     |                     | No  | No  |
| Pellet                                     | 2005616077 | pfam07949                     | Hypothetical protein                                                                 | 181  |             |         |     |                     | No  | No  |
| Pellet                                     | 2005618719 |                               | Hypothetical protein                                                                 | 293  |             |         |     |                     | No  | No  |
| Pellet                                     | 2005621857 |                               | Hypothetical protein                                                                 | 150  |             |         |     |                     | No  | No  |
| Pellet                                     | 2005631078 |                               | Hypothetical protein                                                                 | 217  |             |         |     |                     | No  | No  |
| Pellet / Supernatant                       | 2005610317 |                               | Hypothetical protein                                                                 | 294  |             | COG0265 | O   |                     | No  | No  |
| Soluble                                    | 2005561541 | pfam01522                     | Hypothetical protein                                                                 | 190  |             | COG0726 | G   |                     | No  | No  |
| Soluble                                    | 2005579737 |                               | Hypothetical protein                                                                 | 446  |             | COG1196 | D   |                     | No  | No  |
| Soluble                                    | 2005586435 |                               | Hypothetical protein                                                                 | 426  |             |         |     |                     | No  | No  |
| Soluble                                    | 2005610455 |                               | Hypothetical protein                                                                 | 200  |             |         |     |                     | No  | No  |
| Soluble                                    | 2005613435 |                               | Hypothetical protein                                                                 | 251  |             |         |     |                     | No  | No  |
| Soluble                                    | 2005615184 |                               | Hypothetical protein                                                                 | 288  |             |         |     |                     | No  | No  |
| Supernatant                                | 2005586848 | pfam02604                     | Hypothetical protein                                                                 | 90   |             |         |     | TIGR01552           | No  | No  |
| Supernatant                                | 2005598006 |                               | Hypothetical protein                                                                 | 222  |             |         |     |                     | No  | No  |
| Supernatant                                | 2005598979 |                               | Hypothetical protein                                                                 | 206  |             | COG0731 | C   |                     | No  | No  |
| Supernatant                                | 2005603687 |                               | Hypothetical protein                                                                 | 259  |             |         |     |                     | Yes | No  |
| Supernatant                                | 2005603780 |                               | Hypothetical protein                                                                 | 143  |             | COG1406 | N   |                     | No  | No  |
| Supernatant                                | 2005618573 |                               | Hypothetical protein                                                                 | 201  |             |         |     |                     | Yes | Yes |
| Supernatant / Insoluble                    | 2005563533 |                               | Hypothetical protein                                                                 | 199  |             |         |     |                     | Yes | Yes |
| Supernatant / Insoluble / Soluble          | 2005588401 |                               | Hypothetical protein                                                                 | 210  |             |         |     |                     | Yes | Yes |
| Pellet / Supernatant                       | 2005562909 |                               | Hypothetical protein AII0967                                                         | 488  |             |         |     |                     | No  | No  |
| Supernatant                                | 2005562536 |                               | Hypothetical protein BBG10                                                           | 256  |             |         |     | TIGR02675           | No  | No  |
| Pellet                                     | 2005570639 | pfam01636                     | Hypothetical protein BH0326                                                          | 252  |             | COG3173 | R   |                     | No  | No  |
| Pellet                                     | 2005573251 | pfam01636                     | Hypothetical protein BH0326                                                          | 252  |             | COG3173 | R   |                     | No  | No  |
| Supernatant                                | 2005565071 | pfam01636                     | Hypothetical protein BH0326                                                          | 181  |             | COG0510 | M   |                     | No  | No  |
| Pellet                                     | 2005572088 | pfam07754                     | Hypothetical protein BH1806                                                          | 336  |             |         |     |                     | No  | Yes |
| Global                                     | 2005562852 |                               | Hypothetical protein CAC2564                                                         | 332  |             |         |     |                     | No  | No  |
| Soluble                                    | 2005598568 |                               | Hypothetical protein CPE0111                                                         | 80   |             |         |     |                     | No  | No  |
| Global                                     | 2005617800 | pfam04199                     | Hypothetical protein CT2269                                                          | 150  |             | COG1878 | R   |                     | No  | No  |
| Soluble                                    | 2005611501 | pfam06245                     | Hypothetical protein MM2930                                                          | 193  |             |         |     |                     | No  | No  |
| Pellet                                     | 2005579425 |                               | Hypothetical protein NMA1852                                                         | 475  |             |         |     | TIGR01630           | No  | No  |
| Global / Pellet                            | 2005571643 |                               | Hypothetical protein precursor                                                       | 108  |             |         |     |                     | No  | No  |
| Pellet                                     | 2005602147 |                               | Hypothetical protein TP0412                                                          | 209  |             |         |     |                     | No  | No  |

|                                  |            |                                                   |                                                                     |      |             |         |     |           |     |     |
|----------------------------------|------------|---------------------------------------------------|---------------------------------------------------------------------|------|-------------|---------|-----|-----------|-----|-----|
| Pellet                           | 2005564896 |                                                   | Hypothetical protein TP0443                                         | 270  |             |         |     |           | No  | No  |
| Pellet                           | 2005580798 |                                                   | Hypothetical protein TP0584                                         | 136  |             |         |     |           | No  | No  |
| Supernatant                      | 2005574924 |                                                   | Hypothetical protein TP0608                                         | 210  |             |         |     |           | No  | No  |
| Global                           | 2005565767 |                                                   | Hypothetical protein TP0747                                         | 281  |             |         |     |           | No  | No  |
| Pellet                           | 2005575526 |                                                   | Hypothetical protein TP0747                                         | 270  |             |         |     |           | No  | No  |
| Pellet                           | 2005587648 |                                                   | Hypothetical protein TP0747                                         | 373  |             |         |     |           | No  | No  |
| Pellet                           | 2005614742 |                                                   | Hypothetical protein TP0747                                         | 206  |             |         |     |           | No  | No  |
| Pellet                           | 2005625832 |                                                   | Hypothetical protein TP0747                                         | 300  |             |         |     |           | No  | No  |
| Pellet / Supernatant             | 2005581094 |                                                   | Hypothetical protein TP0747                                         | 304  |             |         |     |           | Yes | No  |
| Supernatant                      | 2005570713 |                                                   | Hypothetical protein TP0747                                         | 340  |             |         |     |           | No  | No  |
| Pellet                           | 2005607982 |                                                   | Hypothetical protein TP0851                                         | 135  |             |         |     |           | No  | No  |
| Supernatant                      | 2005595070 |                                                   | Hypothetical protein TP1001                                         | 253  |             |         |     |           | Yes | Yes |
| Pellet                           | 2005569981 | pfam03880                                         | Hypothetical protein TP1029                                         | 177  |             |         |     |           | No  | No  |
| Pellet                           | 2005579896 | pfam08780                                         | Hypothetical protein TTE1987                                        | 140  |             |         |     | TIGR01987 | No  | No  |
| Pellet                           | 2005563746 |                                                   | Hypothetical protein TTE2422                                        | 624  |             |         |     |           | No  | No  |
| Soluble                          | 2005627134 |                                                   | Hypothetical protein TTE2422                                        | 234  |             |         |     |           | No  | No  |
| Supernatant                      | 2005580822 |                                                   | Hypothetical protein XAC4194                                        | 290  |             |         |     |           | No  | No  |
| Soluble                          | 2005612277 | pfam06545                                         | Hypothetical protein yahG                                           | 270  |             |         |     |           | No  | No  |
| Soluble                          | 2005563691 | pfam00475                                         | Imidazoleglycerol-phosphate dehydratase                             | 214  | EC:4.2.1.19 | COG0131 | E   |           | No  | No  |
| Pellet / Supernatant             | 2005589415 |                                                   | Imidazolonepropionase and related amidohydrolases                   | 175  |             | COG1228 | Q   |           | No  | No  |
| Pellet                           | 2005568344 | pfam00218 pfam00697                               | Indole-3-glycerol phosphate synthase                                | 378  |             | COG0134 | E   |           | No  | No  |
| Pellet                           | 2005561311 | pfam01855 pfam02775                               | Indolepyruvate ferredoxin oxidoreductase, alpha and beta subunits   | 542  | EC:1.2.7.8  | COG4231 | C   | TIGR03336 | No  | No  |
| Pellet                           | 2005576886 | pfam02775                                         | Indolepyruvate ferredoxin oxidoreductase, alpha and beta subunits   | 534  | EC:1.2.7.8  | COG4231 | C   | TIGR03336 | No  | No  |
| Soluble                          | 2005561313 | pfam02775                                         | Indolepyruvate ferredoxin oxidoreductase, alpha and beta subunits   | 541  | EC:1.2.7.8  | COG4231 | C   | TIGR03336 | No  | No  |
| Soluble                          | 2005589896 | pfam01855 pfam02775                               | Indolepyruvate ferredoxin oxidoreductase, alpha and beta subunits   | 552  | EC:1.2.7.8  | COG4231 | C   | TIGR03336 | No  | No  |
| Supernatant / Soluble            | 2005626260 | pfam00406 pfam06123                               | Inner membrane protein involved in colicin E2 resistance            | 264  |             | COG4452 | V   |           | No  | Yes |
| Global / Insoluble / Supernatant | 2005592515 | pfam03030                                         | Inorganic pyrophosphatase                                           | 731  | EC:3.6.1.1  | COG3808 | C   | TIGR01104 | Yes | Yes |
| Pellet                           | 2005570081 | pfam03030                                         | Inorganic pyrophosphatase                                           | 576  | EC:3.6.1.1  | COG3808 | C   | TIGR01104 | Yes | Yes |
| Pellet                           | 2005583378 | pfam03030                                         | Inorganic pyrophosphatase                                           | 766  | EC:3.6.1.1  | COG3808 | C   | TIGR01104 | Yes | Yes |
| Pellet                           | 2005606195 | pfam02833                                         | Inorganic pyrophosphatase/exopolyphosphatase                        | 255  | EC:3.6.1.1  | COG1227 | C   |           | No  | No  |
| Soluble                          | 2005606651 | pfam06738                                         | Integral membrane protein                                           | 195  |             | COG2966 | S   |           | No  | No  |
| Global / Soluble / Supernatant   | 2005610637 | pfam04519                                         | Integral membrane protein CcmA involved in cell shape determination | 99   |             | COG1664 | M   |           | No  | No  |
| Global / Pellet / Soluble        | 2005573956 | pfam02899                                         | Integrase                                                           | 176  |             |         |     |           | No  | No  |
| Supernatant                      | 2005621204 | pfam00589                                         | Integrase                                                           | 99   |             |         |     |           | Yes | No  |
| Supernatant                      | 2005578552 | pfam00665                                         | Integrase domain protein                                            | 375  |             |         |     |           | No  | No  |
| Supernatant                      | 2005592226 | pfam00665                                         | Integrase domain protein                                            | 415  |             |         |     |           | No  | No  |
| Global                           | 2005562460 | pfam00037 pfam00111 pfam02906 pfam10588           | Iron only hydrogenase large subunit, C-terminal domain              | 560  | EC:1.6.5.3  | COG4624 | R   | TIGR02512 | No  | No  |
| Global                           | 2005586899 | pfam00037 pfam02256 pfam02906 pfam10588           | Iron only hydrogenase large subunit, C-terminal domain              | 532  | EC:1.6.5.3  | COG4624 | R   | TIGR02512 | No  | No  |
| Global / Pellet                  | 2005576126 | pfam00037 pfam02256 pfam02906 pfam10588           | Iron only hydrogenase large subunit, C-terminal domain              | 535  | EC:1.6.5.3  | COG4624 | R   | TIGR02512 | No  | No  |
| Global / Supernatant             | 2005568632 | pfam00037 pfam00111 pfam02256 pfam02906 pfam10588 | Iron only hydrogenase large subunit, C-terminal domain              | 583  | EC:1.6.5.3  | COG4624 | R   | TIGR02512 | No  | No  |
| Pellet                           | 2005569347 | pfam00037 pfam00111 pfam02906 pfam10588           | Iron only hydrogenase large subunit, C-terminal domain              | 460  | EC:1.6.5.3  | COG4624 | R   | TIGR02512 | No  | No  |
| Pellet                           | 2005570641 | pfam00037                                         | Iron only hydrogenase large subunit, C-terminal domain              | 378  |             | COG4624 | R   |           | No  | No  |
| Pellet                           | 2005575053 | pfam00037 pfam02256 pfam02906                     | Iron only hydrogenase large subunit, C-terminal domain              | 473  | EC:1.6.5.3  | COG4624 | R   | TIGR02512 | No  | No  |
| Pellet                           | 2005593060 | pfam02256 pfam02906                               | Iron only hydrogenase large subunit, C-terminal domain              | 289  |             | COG4624 | R   |           | No  | No  |
| Pellet                           | 2005599188 | pfam02256 pfam02906                               | Iron only hydrogenase large subunit, C-terminal domain              | 253  |             | COG4624 | R   |           | No  | No  |
| Pellet / Insoluble               | 2005561691 | pfam00037                                         | Iron only hydrogenase large subunit, C-terminal domain              | 438  |             | COG4624 | R   |           | No  | No  |
| Pellet / Soluble                 | 2005586165 | pfam00037 pfam02256 pfam02906                     | Iron only hydrogenase large subunit, C-terminal domain              | 418  |             | COG4624 | R   | TIGR02512 | No  | No  |
| Pellet / Soluble                 | 2005591380 | pfam02256 pfam02906                               | Iron only hydrogenase large subunit, C-terminal domain              | 232  |             | COG4624 | R   |           | No  | No  |
| Pellet / Supernatant             | 2005573143 | pfam00037 pfam00111 pfam02906 pfam10588           | Iron only hydrogenase large subunit, C-terminal domain              | 389  |             | COG3383 | R   |           | No  | No  |
| Soluble                          | 2005572091 | pfam00037 pfam00111 pfam02906 pfam10588           | Iron only hydrogenase large subunit, C-terminal domain              | 426  |             | COG4624 | R   | TIGR02512 | No  | No  |
| Soluble                          | 2005576125 | pfam00037 pfam00111 pfam02256 pfam02906 pfam10588 | Iron only hydrogenase large subunit, C-terminal domain              | 584  | EC:1.6.5.3  | COG4624 | R   | TIGR02512 | No  | No  |
| Soluble                          | 2005603070 | pfam02256 pfam02906                               | Iron only hydrogenase large subunit, C-terminal domain              | 230  |             | COG4624 | R   |           | No  | No  |
| Supernatant                      | 2005605266 |                                                   | Iron only hydrogenase large subunit, C-terminal domain              | 221  |             | COG4624 | R   |           | No  | No  |
| Soluble                          | 2005591548 | pfam00180                                         | Isocitrate dehydrogenases                                           | 254  |             | COG0538 | C   | TIGR00127 | No  | No  |
| Soluble                          | 2005592190 | pfam00180                                         | Isocitrate dehydrogenases                                           | 395  | EC:1.1.1.42 | COG0538 | C   | TIGR00127 | No  | No  |
| Soluble                          | 2005599842 | pfam00180                                         | Isocitrate dehydrogenases                                           | 203  |             | COG0538 | C   | TIGR00127 | No  | No  |
| Supernatant                      | 2005582200 |                                                   | Isocitrate dehydrogenases                                           | 91   |             | COG0538 | C   | TIGR00127 | No  | No  |
| Pellet                           | 2005577994 | pfam00180                                         | Isocitrate/isopropylmalate dehydrogenase                            | 145  |             | COG0473 | C E |           | No  | No  |
| Global                           | 2005580162 | pfam00133 pfam08264                               | Isoleucyl-tRNA synthetase                                           | 431  |             | COG0060 | J   |           | No  | No  |
| Pellet                           | 2005608955 |                                                   | Isoleucyl-tRNA synthetase                                           | 92   |             |         |     |           | No  | No  |
| Soluble                          | 2005563369 | pfam00133 pfam08264                               | Isoleucyl-tRNA synthetase                                           | 975  | EC:6.1.1.5  | COG0060 | J   | TIGR00392 | No  | No  |
| Pellet                           | 2005560688 | pfam00682 pfam08502                               | Isopropylmalate/homocitrate/citramalate synthases                   | 332  |             | COG0119 | E   |           | No  | No  |
| Pellet                           | 2005562376 | pfam00682 pfam08502                               | Isopropylmalate/homocitrate/citramalate synthases                   | 513  | EC:2.3.3.13 | COG0119 | E   | TIGR00973 | No  | No  |
| Pellet                           | 2005563988 | pfam00682 pfam08502                               | Isopropylmalate/homocitrate/citramalate synthases                   | 267  |             | COG0119 | E   |           | No  | No  |
| Pellet                           | 2005572779 | pfam00682                                         | Isopropylmalate/homocitrate/citramalate synthases                   | 183  |             | COG0119 | E   |           | No  | No  |
| Pellet                           | 2005576217 | pfam00682 pfam08502                               | Isopropylmalate/homocitrate/citramalate synthases                   | 545  | EC:2.3.3.13 | COG0119 | E   | TIGR00977 | No  | No  |
| Soluble                          | 2005561703 | pfam00682 pfam08502                               | Isopropylmalate/homocitrate/citramalate synthases                   | 539  | EC:2.3.3.13 | COG0119 | E   | TIGR00977 | No  | No  |
| Insoluble                        | 2005577992 | pfam01450 pfam07991                               | Ketol-acid reductoisomerase                                         | 367  | EC:1.1.1.86 | COG0059 | E H | TIGR00465 | No  | No  |
| Pellet                           | 2005582393 | pfam01450 pfam07991                               | Ketol-acid reductoisomerase                                         | 489  | EC:1.1.1.86 | COG0059 | H E | TIGR00465 | No  | No  |
| Pellet / Supernatant / Global    | 2005561702 | pfam01450 pfam07991                               | Ketol-acid reductoisomerase                                         | 308  | EC:1.1.1.86 | COG0059 | E H | TIGR00465 | No  | No  |
| Soluble                          | 2005631299 | pfam01450 pfam07991                               | Ketol-acid reductoisomerase                                         | 251  | EC:1.1.1.86 | COG0059 | H E | TIGR00465 | No  | No  |
| Soluble / Global                 | 2005565220 | pfam01450 pfam07991                               | Ketol-acid reductoisomerase                                         | 334  | EC:1.1.1.86 | COG0059 | H E | TIGR00465 | Yes | No  |
| Soluble / Supernatant            | 2005578224 | pfam01450 pfam07991                               | Ketol-acid reductoisomerase                                         | 334  | EC:1.1.1.86 | COG0059 | H E | TIGR00465 | No  | No  |
| Soluble / Supernatant            | 2005586381 | pfam01450 pfam07991                               | Ketol-acid reductoisomerase                                         | 232  |             | COG0059 | H E | TIGR00465 | No  | No  |
| Supernatant                      | 2005564443 | pfam01450 pfam03807                               | Ketol-acid reductoisomerase                                         | 331  | EC:1.1.1.86 | COG0059 | E H | TIGR00465 | Yes | No  |
| Pellet / Soluble                 | 2005606657 | pfam00903                                         | Lactoylglutathione lyase and related lyases                         | 93   |             |         |     | TIGR03081 | No  | No  |
| Pellet / Soluble / Supernatant   | 2005594584 |                                                   | Lactoylglutathione lyase and related lyases                         | 58   |             |         |     |           | No  | No  |
| Pellet                           | 2005563361 | pfam02610                                         | L-arabinose isomerase                                               | 409  | EC:5.3.1.4  | COG2160 | G   |           | No  | No  |
| Soluble                          | 2005560351 | pfam02610                                         | L-arabinose isomerase                                               | 491  | EC:5.3.1.4  | COG2160 | G   |           | No  | No  |
| Soluble                          | 2005570305 | pfam02610                                         | L-arabinose isomerase                                               | 342  |             | COG2160 | G   |           | No  | No  |
| Pellet                           | 2005572555 | pfam07703                                         | Large extracellular alpha-helical protein                           | 582  |             | COG2373 | R   |           | No  | No  |
| Pellet                           | 2005584895 | pfam01835 pfam07703                               | Large extracellular alpha-helical protein                           | 1524 |             | COG2373 | R   |           | No  | No  |
| Pellet                           | 2005560198 |                                                   | Leucine-rich repeat (LRR) protein                                   | 206  |             |         |     |           | Yes | No  |
| Pellet                           | 2005576842 | pfam09479                                         | Leucine-rich repeat (LRR) protein                                   | 1210 |             |         |     | TIGR02543 | No  | No  |
| Pellet                           | 2005621974 | pfam00883 pfam02789                               | Leucyl aminopeptidase                                               | 195  |             | COG0260 | E   |           | No  | No  |
| Soluble                          | 2005563267 |                                                   | Leucyl aminopeptidase (aminopeptidase T)                            | 379  | EC:3.4.11.- | COG2309 | E   |           | No  | No  |
| Soluble                          | 2005563299 |                                                   | Leucyl aminopeptidase (aminopeptidase T)                            | 309  |             | COG2309 | E   |           | No  | No  |

|                                   |            |                                         |                                                                       |     |             |         |     |                     |     |     |
|-----------------------------------|------------|-----------------------------------------|-----------------------------------------------------------------------|-----|-------------|---------|-----|---------------------|-----|-----|
| Supernatant                       | 2005588422 | pfam00133                               | Leucyl-tRNA synthetase                                                | 379 |             | COG0495 | J   |                     | No  | No  |
| Insoluble / Pellet                | 2005574459 | pfam02952 pfam07881 pfam07882           | L-fucose isomerase and related proteins                               | 428 | EC:5.3.1.25 | COG2407 | G   | TIGR01089           | No  | No  |
| Soluble                           | 2005590062 | pfam07881 pfam07882                     | L-fucose isomerase and related proteins                               | 337 |             | COG2407 | G   | TIGR01089           | No  | No  |
| Global / Supernatant              | 2005590546 |                                         | Lipoprotein, putative                                                 | 166 |             | COG3889 | R   |                     | No  | No  |
| Soluble                           | 2005574607 | pfam00501                               | Long-chain acyl-CoA synthetases (AMP-forming)                         | 242 |             | COG1022 | I   |                     | No  | No  |
| Supernatant                       | 2005578903 | pfam00501                               | Long-chain acyl-CoA synthetases (AMP-forming)                         | 553 |             | COG1022 | I   |                     | No  | No  |
| Soluble                           | 2005577333 | pfam06134                               | L-rhamnose isomerase                                                  | 280 |             | COG4806 | G   | TIGR01748           | No  | No  |
| Pellet / Supernatant              | 2005560802 | pfam02664                               | LuxS protein involved in autoinducer AI2 synthesis                    | 158 | EC:4.4.1.21 | COG1854 | T   |                     | No  | No  |
| Supernatant / Soluble             | 2005628689 | pfam02664                               | LuxS protein involved in autoinducer AI2 synthesis                    | 161 | EC:4.4.1.21 | COG1854 | T   |                     | No  | No  |
| Supernatant                       | 2005594551 |                                         | Lysine 2,3-aminomutase                                                | 144 |             | COG1509 | E   |                     | No  | No  |
| Pellet                            | 2005603293 |                                         | Lysophospholipase                                                     | 113 |             | COG2267 | I   |                     | No  | No  |
| Soluble                           | 2005610118 | pfam00561                               | Lysophospholipase                                                     | 257 | EC:3.1.1.5  | COG2267 | I   |                     | No  | No  |
| Pellet                            | 2005585271 |                                         | M23/M37 peptidase domain protein                                      | 214 |             |         |     |                     | Yes | Yes |
| Pellet                            | 2005568332 |                                         | Major membrane protein I                                              | 280 |             |         |     |                     | No  | No  |
| Pellet                            | 2005578326 |                                         | Major membrane protein I                                              | 266 |             |         |     |                     | No  | No  |
| Pellet / Insoluble                | 2005567328 |                                         | Major membrane protein I                                              | 315 |             |         |     |                     | No  | No  |
| Soluble                           | 2005566709 |                                         | Major membrane protein I                                              | 315 |             |         |     |                     | No  | No  |
| Insoluble                         | 2005598431 | pfam00056                               | Malate/lactate dehydrogenases                                         | 170 |             | COG0039 | C   |                     | Yes | No  |
| Pellet                            | 2005630421 | pfam02866                               | Malate/lactate dehydrogenases                                         | 66  |             | COG0039 | C   |                     | No  | No  |
| Soluble                           | 2005564665 | pfam02615                               | Malate/L-lactate dehydrogenases                                       | 71  |             | COG2055 | C   |                     | No  | No  |
| Soluble                           | 2005630875 | pfam02615                               | Malate/L-lactate dehydrogenases                                       | 271 |             | COG2055 | C   |                     | No  | No  |
| Soluble                           | 2005567780 | pfam00390 pfam03949                     | Malic enzyme                                                          | 411 | EC:1.1.1.38 | COG0281 | C   |                     | No  | No  |
| Soluble                           | 2005579739 | pfam00390 pfam03949                     | Malic enzyme                                                          | 391 | EC:1.1.1.38 | COG0281 | C   |                     | No  | No  |
| Insoluble / Pellet / Supernatant  | 2005601395 | pfam01547                               | Maltose-binding periplasmic proteins/domains                          | 282 |             | COG2182 | G   |                     | No  | No  |
| Pellet / Insoluble                | 2005630275 | pfam01547                               | Maltose-binding periplasmic proteins/domains                          | 287 |             | COG2182 | G   |                     | No  | No  |
| Soluble                           | 2005592104 | pfam00912                               | Membrane carboxypeptidase/penicillin-binding protein                  | 209 |             | COG5009 | M   |                     | No  | No  |
| Supernatant                       | 2005610741 |                                         | Membrane carboxypeptidase/penicillin-binding protein                  | 248 |             | COG5009 | M   |                     | No  | No  |
| Soluble                           | 2005595932 | pfam00679 pfam06421                     | Membrane GTPase LepA                                                  | 247 |             | COG0481 | M   | TIGR01393           | No  | No  |
| Insoluble / Soluble / Supernatant | 2005581870 | pfam02608                               | Membrane lipoprotein TmpC, putative                                   | 119 |             | COG1744 | R   |                     | No  | No  |
| Global                            | 2005572738 | pfam01145                               | Membrane protease subunits, stomatin/prohibitin homologs              | 304 |             | COG0330 | O   |                     | Yes | Yes |
| Global                            | 2005577156 | pfam01145                               | Membrane protease subunits, stomatin/prohibitin homologs              | 215 |             | COG0330 | O   |                     | No  | No  |
| Pellet                            | 2005569222 | pfam01145                               | Membrane protease subunits, stomatin/prohibitin homologs              | 325 |             | COG0330 | O   | TIGR01932           | Yes | Yes |
| Pellet                            | 2005574279 | pfam01145                               | Membrane protease subunits, stomatin/prohibitin homologs              | 325 |             | COG0330 | O   | TIGR01932           | Yes | Yes |
| Pellet                            | 2005622061 | pfam01145                               | Membrane protease subunits, stomatin/prohibitin homologs              | 215 |             | COG0330 | O   |                     | No  | No  |
| Supernatant                       | 2005562935 | pfam01145                               | Membrane protease subunits, stomatin/prohibitin homologs              | 198 |             | COG0330 | O   | TIGR01933           | No  | No  |
| Supernatant                       | 2005562936 | pfam01145                               | Membrane protease subunits, stomatin/prohibitin homologs              | 324 |             | COG0330 | O   | TIGR01932           | Yes | Yes |
| Supernatant                       | 2005598485 | pfam03741                               | Membrane protein TerC, possibly involved in tellurium resistance      | 272 |             | COG0861 | P   |                     | Yes | Yes |
| Pellet                            | 2005562247 | pfam07556                               | Membrane spanning protein                                             | 388 |             |         |     |                     | Yes | Yes |
| Pellet                            | 2005585490 | pfam07556                               | Membrane spanning protein                                             | 663 |             |         |     |                     | No  | Yes |
| Global                            | 2005590000 |                                         | Membrane-fusion protein                                               | 346 |             | COG0845 | M   | TIGR01730           | No  | No  |
| Pellet                            | 2005583883 | pfam00529                               | Membrane-fusion protein                                               | 380 |             | COG0845 | M   | TIGR01730           | No  | No  |
| Pellet                            | 2005585305 |                                         | Membrane-fusion protein                                               | 279 |             | COG0845 | M   | TIGR01730           | No  | No  |
| Supernatant                       | 2005575219 |                                         | Membrane-fusion protein                                               | 190 |             | COG0845 | M   |                     | No  | No  |
| Pellet                            | 2005585637 | pfam01546                               | Metal-dependent amidase/aminocyclase/carboxypeptidase                 | 291 |             | COG1473 | R   | TIGR01891           | No  | No  |
| Global / Soluble / Supernatant    | 2005592366 |                                         | Methanol                                                              | 404 |             |         |     |                     | No  | No  |
| Soluble                           | 2005565849 |                                         | Methanol                                                              | 250 |             |         |     |                     | No  | No  |
| Soluble                           | 2005576456 |                                         | Methanol                                                              | 142 |             |         |     |                     | No  | No  |
| Pellet                            | 2005626638 | pfam02574                               | Methionine synthase I (cobalamin-dependent), methyltransferase domain | 270 |             | COG0646 | E   |                     | No  | No  |
| Soluble                           | 2005584830 | pfam02574                               | Methionine synthase I (cobalamin-dependent), methyltransferase domain | 264 |             | COG0646 | E   |                     | No  | No  |
| Soluble                           | 2005566479 |                                         | Methionine synthase I, cobalamin-binding domain                       | 202 |             | COG1410 | E   |                     | No  | No  |
| Soluble                           | 2005604928 | pfam00809                               | Methionine synthase I, cobalamin-binding domain                       | 206 |             | COG1410 | E   |                     | No  | No  |
| Supernatant                       | 2005570317 | pfam00809 pfam02574 pfam02607           | Methionine synthase I, cobalamin-binding domain                       | 737 |             | COG1410 | E   | TIGR02082           | No  | No  |
| Pellet / Supernatant              | 2005574956 | pfam09334                               | Methionyl-tRNA synthetase                                             | 212 |             | COG0143 | J   |                     | No  | No  |
| Soluble                           | 2005587836 | pfam01588 pfam09334                     | Methionyl-tRNA synthetase                                             | 761 | EC:6.1.1.10 | COG0143 | J   | TIGR00398 TIGR00399 | No  | No  |
| Soluble                           | 2005614469 | pfam09334                               | Methionyl-tRNA synthetase                                             | 275 |             | COG0143 | J   |                     | No  | No  |
| Global                            | 2005571214 | pfam00015 pfam04060                     | Methyl-accepting chemotaxis protein                                   | 406 |             | COG0840 | T N |                     | Yes | No  |
| Global                            | 2005582228 | pfam00015 pfam00672                     | Methyl-accepting chemotaxis protein                                   | 412 |             | COG0840 | N T |                     | Yes | Yes |
| Global                            | 2005587442 | pfam00015 pfam00672                     | Methyl-accepting chemotaxis protein                                   | 691 |             | COG0840 | N T |                     | Yes | Yes |
| Global                            | 2005597275 |                                         | Methyl-accepting chemotaxis protein                                   | 296 |             |         |     |                     | No  | No  |
| Global                            | 2005618790 | pfam00672                               | Methyl-accepting chemotaxis protein                                   | 265 |             |         |     |                     | Yes | Yes |
| Global / Insoluble                | 2005574283 | pfam00015 pfam00672                     | Methyl-accepting chemotaxis protein                                   | 427 |             | COG0840 | N T |                     | Yes | Yes |
| Global / Insoluble / Pellet       | 2005577262 | pfam00015 pfam00672                     | Methyl-accepting chemotaxis protein                                   | 731 |             | COG0840 | N T |                     | Yes | Yes |
| Global / Pellet                   | 2005579753 | pfam00015                               | Methyl-accepting chemotaxis protein                                   | 337 |             | COG0840 | T N |                     | No  | No  |
| Global / Pellet                   | 2005594558 | pfam00015 pfam00672                     | Methyl-accepting chemotaxis protein                                   | 446 |             | COG0840 | N T |                     | No  | Yes |
| Global / Pellet                   | 2005595256 | pfam00015                               | Methyl-accepting chemotaxis protein                                   | 323 |             | COG0840 | N T |                     | No  | No  |
| Global / Soluble                  | 2005606501 | pfam00015                               | Methyl-accepting chemotaxis protein                                   | 267 |             | COG0840 | T N |                     | No  | No  |
| Global / Supernatant              | 2005571457 |                                         | Methyl-accepting chemotaxis protein                                   | 143 |             |         |     |                     | No  | No  |
| Global / Supernatant              | 2005575629 | pfam00015                               | Methyl-accepting chemotaxis protein                                   | 405 |             | COG0840 | N T |                     | No  | Yes |
| Global / Supernatant              | 2005581986 | pfam00015 pfam00672                     | Methyl-accepting chemotaxis protein                                   | 596 |             | COG0840 | N T |                     | No  | Yes |
| Global / Supernatant              | 2005584206 | pfam00015 pfam00672                     | Methyl-accepting chemotaxis protein                                   | 447 |             | COG0840 | T N |                     | No  | Yes |
| Insoluble                         | 2005560133 | pfam00015                               | Methyl-accepting chemotaxis protein                                   | 308 |             | COG0840 | N T |                     | Yes | Yes |
| Insoluble                         | 2005565053 | pfam00015 pfam00672                     | Methyl-accepting chemotaxis protein                                   | 614 |             | COG0840 | T N |                     | Yes | Yes |
| Insoluble                         | 2005571439 | pfam00015 pfam00672                     | Methyl-accepting chemotaxis protein                                   | 387 |             | COG0840 | T N |                     | No  | Yes |
| Insoluble                         | 2005587810 | pfam00015 pfam00672                     | Methyl-accepting chemotaxis protein                                   | 560 |             | COG0840 | N T |                     | Yes | Yes |
| Insoluble / Global                | 2005561990 | pfam00015 pfam00672 pfam02743           | Methyl-accepting chemotaxis protein                                   | 433 |             | COG0840 | N T |                     | No  | Yes |
| Insoluble / Pellet                | 2005588846 | pfam00015 pfam00672                     | Methyl-accepting chemotaxis protein                                   | 620 |             | COG0840 | N T |                     | No  | Yes |
| Insoluble / Pellet / Supernatant  | 2005572815 | pfam00015 pfam00672                     | Methyl-accepting chemotaxis protein                                   | 480 |             | COG0840 | T N |                     | No  | Yes |
| Insoluble / Soluble               | 2005571631 | pfam00015 pfam00672                     | Methyl-accepting chemotaxis protein                                   | 607 |             | COG0840 | N T |                     | Yes | Yes |
| Insoluble / Soluble               | 2005576582 | pfam00015 pfam00672                     | Methyl-accepting chemotaxis protein                                   | 485 |             | COG0840 | N T |                     | Yes | Yes |
| Insoluble / Supernatant           | 2005596041 | pfam00015                               | Methyl-accepting chemotaxis protein                                   | 254 |             | COG0840 | N T |                     | No  | No  |
| Pellet                            | 2005560371 | pfam00015 pfam00072 pfam00672 pfam02743 | Methyl-accepting chemotaxis protein                                   | 825 |             | COG0840 | T N |                     | Yes | Yes |
| Pellet                            | 2005560963 | pfam00015                               | Methyl-accepting chemotaxis protein                                   | 297 |             | COG0840 | N T |                     | No  | No  |
| Pellet                            | 2005561099 |                                         | Methyl-accepting chemotaxis protein                                   | 280 |             |         |     |                     | No  | No  |
| Pellet                            | 2005561143 | pfam00015                               | Methyl-accepting chemotaxis protein                                   | 307 |             | COG0840 | N T |                     | No  | No  |
| Pellet                            | 2005561615 | pfam00015 pfam00072                     | Methyl-accepting chemotaxis protein                                   | 422 |             | COG0840 | T N |                     | No  | No  |
| Pellet                            | 2005561724 | pfam00015                               | Methyl-accepting chemotaxis protein                                   | 387 |             | COG0840 | T N |                     | No  | No  |
| Pellet                            | 2005562127 | pfam00015                               | Methyl-accepting chemotaxis protein                                   | 304 |             | COG0840 | T N |                     | Yes | No  |

|                                            |            |                                         |                                                                         |     |             |         |     |                     |     |     |
|--------------------------------------------|------------|-----------------------------------------|-------------------------------------------------------------------------|-----|-------------|---------|-----|---------------------|-----|-----|
| Pellet                                     | 2005563121 | pfam00015                               | Methyl-accepting chemotaxis protein                                     | 222 |             | COG0840 | N T |                     | No  | No  |
| Pellet                                     | 2005565708 | pfam00015 pfam00672                     | Methyl-accepting chemotaxis protein                                     | 679 |             | COG0840 | T N |                     | No  | Yes |
| Pellet                                     | 2005566073 | pfam00015                               | Methyl-accepting chemotaxis protein                                     | 258 |             | COG0840 | N T |                     | Yes | No  |
| Pellet                                     | 2005567897 | pfam00015 pfam00037                     | Methyl-accepting chemotaxis protein                                     | 691 |             | COG0840 | N T |                     | No  | No  |
| Pellet                                     | 2005570213 | pfam00672 pfam02743                     | Methyl-accepting chemotaxis protein                                     | 423 |             | COG0840 | N T |                     | No  | Yes |
| Pellet                                     | 2005570669 | pfam00015 pfam00037 pfam00072           | Methyl-accepting chemotaxis protein                                     | 809 |             | COG0840 | N T |                     | No  | No  |
| Pellet                                     | 2005574281 | pfam00015 pfam00672                     | Methyl-accepting chemotaxis protein                                     | 485 |             | COG0840 | T N |                     | No  | Yes |
| Pellet                                     | 2005575915 | pfam00015 pfam00672                     | Methyl-accepting chemotaxis protein                                     | 722 |             | COG0840 | N T |                     | Yes | Yes |
| Pellet                                     | 2005579374 | pfam00015 pfam00072 pfam00672           | Methyl-accepting chemotaxis protein                                     | 828 |             | COG0840 | T N |                     | Yes | Yes |
| Pellet                                     | 2005580743 | pfam00015 pfam00672                     | Methyl-accepting chemotaxis protein                                     | 531 |             | COG0840 | N T |                     | Yes | Yes |
| Pellet                                     | 2005580950 | pfam00672                               | Methyl-accepting chemotaxis protein                                     | 464 |             | COG0840 | T N |                     | No  | Yes |
| Pellet                                     | 2005582206 | pfam00015                               | Methyl-accepting chemotaxis protein                                     | 384 |             | COG0840 | T N |                     | No  | No  |
| Pellet                                     | 2005583682 | pfam00015 pfam00672                     | Methyl-accepting chemotaxis protein                                     | 656 |             | COG0840 | T N |                     | Yes | Yes |
| Pellet                                     | 2005584511 | pfam00015 pfam00672                     | Methyl-accepting chemotaxis protein                                     | 562 |             | COG0840 | N T | TIGR03057           | No  | Yes |
| Pellet                                     | 2005584838 | pfam00015 pfam00672                     | Methyl-accepting chemotaxis protein                                     | 535 |             | COG0840 | T N |                     | Yes | Yes |
| Pellet                                     | 2005585890 | pfam00015                               | Methyl-accepting chemotaxis protein                                     | 412 |             | COG0840 | N T |                     | Yes | Yes |
| Pellet                                     | 2005586305 | pfam00015                               | Methyl-accepting chemotaxis protein                                     | 281 |             | COG0840 | T N |                     | No  | No  |
| Pellet                                     | 2005587806 | pfam00015 pfam00672                     | Methyl-accepting chemotaxis protein                                     | 590 |             | COG0840 | T N |                     | No  | Yes |
| Pellet                                     | 2005587812 | pfam00672                               | Methyl-accepting chemotaxis protein                                     | 323 |             |         |     |                     | Yes | Yes |
| Pellet                                     | 2005588296 | pfam00015 pfam00672                     | Methyl-accepting chemotaxis protein                                     | 376 |             | COG0840 | T N |                     | No  | Yes |
| Pellet                                     | 2005589091 | pfam00015                               | Methyl-accepting chemotaxis protein                                     | 206 |             | COG0840 | N T |                     | No  | No  |
| Pellet                                     | 2005590276 | pfam00015 pfam00072                     | Methyl-accepting chemotaxis protein                                     | 424 |             | COG0840 | T N |                     | No  | No  |
| Pellet                                     | 2005590638 | pfam00015 pfam04060                     | Methyl-accepting chemotaxis protein                                     | 356 |             | COG0840 | T N |                     | No  | No  |
| Pellet                                     | 2005592093 | pfam00015 pfam00672 pfam02743           | Methyl-accepting chemotaxis protein                                     | 638 |             | COG0840 | N T |                     | No  | Yes |
| Pellet                                     | 2005592569 | pfam00015 pfam00072 pfam00672           | Methyl-accepting chemotaxis protein                                     | 675 |             | COG0840 | N T |                     | No  | Yes |
| Pellet                                     | 2005594656 | pfam00015                               | Methyl-accepting chemotaxis protein                                     | 237 |             | COG0840 | N T |                     | No  | No  |
| Pellet                                     | 2005601303 | pfam00672                               | Methyl-accepting chemotaxis protein                                     | 268 |             | COG5002 | T   |                     | No  | Yes |
| Pellet                                     | 2005605897 | pfam00015                               | Methyl-accepting chemotaxis protein                                     | 278 |             | COG0840 | T N |                     | Yes | No  |
| Pellet                                     | 2005606112 | pfam00672                               | Methyl-accepting chemotaxis protein                                     | 230 |             | COG0840 | T N |                     | Yes | Yes |
| Pellet                                     | 2005610901 | pfam00015 pfam00672                     | Methyl-accepting chemotaxis protein                                     | 263 |             | COG0840 | N T |                     | Yes | Yes |
| Pellet                                     | 2005619951 | pfam00015                               | Methyl-accepting chemotaxis protein                                     | 281 |             | COG0840 | T N |                     | No  | No  |
| Pellet                                     | 2005623740 | pfam00015                               | Methyl-accepting chemotaxis protein                                     | 263 |             | COG0840 | T N |                     | No  | No  |
| Pellet                                     | 2005624662 | pfam00672                               | Methyl-accepting chemotaxis protein                                     | 264 |             | COG0840 | N T |                     | No  | Yes |
| Pellet                                     | 2005629022 | pfam00015                               | Methyl-accepting chemotaxis protein                                     | 251 |             | COG0840 | T N |                     | No  | No  |
| Pellet / Global                            | 2005627950 | pfam00672                               | Methyl-accepting chemotaxis protein                                     | 256 |             | COG0840 | T N |                     | No  | Yes |
| Pellet / Soluble / Supernatant             | 2005577086 | pfam00015                               | Methyl-accepting chemotaxis protein                                     | 226 |             | COG0840 | T N |                     | No  | No  |
| Pellet / Supernatant                       | 2005572697 | pfam00015 pfam00672                     | Methyl-accepting chemotaxis protein                                     | 540 |             | COG0840 | N T |                     | No  | Yes |
| Pellet / Supernatant                       | 2005583853 | pfam00015 pfam00672                     | Methyl-accepting chemotaxis protein                                     | 719 |             | COG0840 | T N |                     | Yes | Yes |
| Pellet / Supernatant                       | 2005588783 | pfam00015                               | Methyl-accepting chemotaxis protein                                     | 361 |             | COG0840 | T N |                     | No  | No  |
| Pellet / Supernatant                       | 2005588793 | pfam00015 pfam00672                     | Methyl-accepting chemotaxis protein                                     | 427 |             | COG0840 | T N |                     | No  | Yes |
| Pellet / Supernatant                       | 2005590232 | pfam00015 pfam00672                     | Methyl-accepting chemotaxis protein                                     | 749 |             | COG0840 | T N |                     | Yes | Yes |
| Pellet / Supernatant                       | 2005560171 | pfam00015 pfam00672                     | Methyl-accepting chemotaxis protein                                     | 293 |             | COG0840 | N T |                     | No  | No  |
| Pellet / Supernatant                       | 2005563704 | pfam00015 pfam00672                     | Methyl-accepting chemotaxis protein                                     | 479 |             | COG0840 | N T |                     | Yes | Yes |
| Pellet / Supernatant                       | 2005563812 | pfam00015 pfam00672                     | Methyl-accepting chemotaxis protein                                     | 312 |             | COG0840 | T N |                     | No  | Yes |
| Pellet / Supernatant                       | 2005564280 | pfam00015                               | Methyl-accepting chemotaxis protein                                     | 248 |             | COG0840 | T N |                     | No  | No  |
| Pellet / Supernatant                       | 2005627262 | pfam00015                               | Methyl-accepting chemotaxis protein                                     | 278 |             | COG0840 | N T |                     | No  | No  |
| Soluble                                    | 2005560154 | pfam00015 pfam00672                     | Methyl-accepting chemotaxis protein                                     | 447 |             | COG0840 | N T |                     | No  | Yes |
| Soluble                                    | 2005560556 | pfam00015                               | Methyl-accepting chemotaxis protein                                     | 279 |             | COG0840 | T N |                     | No  | No  |
| Soluble                                    | 2005577001 | pfam00015 pfam00672                     | Methyl-accepting chemotaxis protein                                     | 436 |             | COG0840 | N T |                     | Yes | Yes |
| Soluble                                    | 2005589214 | pfam00015 pfam00672                     | Methyl-accepting chemotaxis protein                                     | 520 |             | COG0840 | N T |                     | No  | Yes |
| Soluble                                    | 2005606081 | pfam00015                               | Methyl-accepting chemotaxis protein                                     | 226 |             | COG0840 | T N |                     | No  | No  |
| Supernatant                                | 2005562786 | pfam00015 pfam00672                     | Methyl-accepting chemotaxis protein                                     | 446 |             | COG0840 | N T |                     | No  | Yes |
| Supernatant                                | 2005563366 | pfam00015 pfam00072 pfam00672           | Methyl-accepting chemotaxis protein                                     | 672 |             | COG0840 | N T |                     | No  | Yes |
| Supernatant                                | 2005563995 | pfam00015 pfam00672                     | Methyl-accepting chemotaxis protein                                     | 484 |             | COG0840 | N T |                     | No  | Yes |
| Supernatant                                | 2005571253 | pfam00015 pfam00672                     | Methyl-accepting chemotaxis protein                                     | 536 |             | COG0840 | T N |                     | No  | Yes |
| Supernatant                                | 2005572700 | pfam00015 pfam00672                     | Methyl-accepting chemotaxis protein                                     | 520 |             | COG0840 | N T |                     | No  | Yes |
| Supernatant                                | 2005575195 | pfam00015                               | Methyl-accepting chemotaxis protein                                     | 618 |             | COG0840 | T N |                     | No  | Yes |
| Supernatant                                | 2005583703 | pfam00015 pfam00072 pfam00672 pfam02743 | Methyl-accepting chemotaxis protein                                     | 857 |             | COG0840 | T N |                     | Yes | Yes |
| Supernatant                                | 2005590464 | pfam00015 pfam00672                     | Methyl-accepting chemotaxis protein                                     | 478 |             | COG0840 | T N |                     | No  | Yes |
| Supernatant                                | 2005610793 | pfam00672                               | Methyl-accepting chemotaxis protein                                     | 267 |             | COG0840 | T N |                     | No  | Yes |
| Supernatant / Global                       | 2005624787 | pfam00015                               | Methyl-accepting chemotaxis protein                                     | 244 |             | COG0840 | N T |                     | No  | No  |
| Supernatant / Soluble / Global             | 2005563682 | pfam00015                               | Methyl-accepting chemotaxis protein                                     | 435 |             | COG0840 | N T |                     | No  | No  |
| Pellet                                     | 2005569655 | pfam03705 pfam08242                     | Methylase of chemotaxis methyl-accepting proteins                       | 270 | EC:2.1.1.80 | COG1352 | N T |                     | No  | No  |
| Supernatant                                | 2005568843 | pfam01739                               | Methylase of chemotaxis methyl-accepting proteins                       | 89  |             | COG1352 | N T |                     | No  | No  |
| Supernatant                                | 2005595088 | pfam01739                               | Methylase of chemotaxis methyl-accepting proteins                       | 244 | EC:2.1.1.80 | COG1352 | N T |                     | No  | No  |
| Supernatant / Insoluble                    | 2005561468 | pfam03705 pfam08242                     | Methylase of chemotaxis methyl-accepting proteins                       | 316 | EC:2.1.1.80 | COG1352 | T N |                     | No  | No  |
| Global                                     | 2005604865 |                                         | Methylase of polypeptide chain release factors                          | 101 |             | COG2890 | J   |                     | No  | No  |
| Soluble                                    | 2005611765 | pfam02310                               | Methylmalonyl-CoA mutase, C-terminal domain/subunit (cobalamin-binding) | 168 |             | COG2185 | I   | TIGR00640           | No  | No  |
| Pellet                                     | 2005629174 | pfam01642                               | Methylmalonyl-CoA mutase, N-terminal domain/subunit                     | 282 |             | COG1884 | I   |                     | Yes | No  |
| Pellet / Soluble / Supernatant             | 2005608831 | pfam01642                               | Methylmalonyl-CoA mutase, N-terminal domain/subunit                     | 283 |             | COG1884 | I   | TIGR00641           | No  | No  |
| Soluble                                    | 2005561637 | pfam01642                               | Methylmalonyl-CoA mutase, N-terminal domain/subunit                     | 248 |             | COG1884 | I   |                     | No  | No  |
| Supernatant                                | 2005583506 | pfam01642                               | Methylmalonyl-CoA mutase, N-terminal domain/subunit                     | 360 |             | COG1884 | I   | TIGR00641           | Yes | No  |
| Pellet                                     | 2005588590 | pfam00571 pfam01769 pfam03448           | Mg/Co/Ni transporter MgtE (contains CBS domain)                         | 363 |             | COG2239 | P   | TIGR00400           | No  | Yes |
| Global                                     | 2005566086 | pfam01026                               | Mg-dependent DNase                                                      | 258 | EC:3.1.21.- | COG0084 | L   | TIGR00010           | No  | No  |
| Pellet / Supernatant                       | 2005567198 | pfam01026                               | Mg-dependent DNase                                                      | 232 | EC:3.1.21.- | COG0084 | L   | TIGR00010           | No  | No  |
| Pellet                                     | 2005571491 | pfam00488 pfam05190                     | Mismatch repair ATPase (MutS family)                                    | 543 |             | COG0249 | L   | TIGR01070           | No  | No  |
| Global                                     | 2005563129 | pfam00012                               | Molecular chaperone                                                     | 437 |             | COG0443 | O   | TIGR02350           | No  | No  |
| Global / Pellet / Soluble / Supernatant    | 2005570573 | pfam00012                               | Molecular chaperone                                                     | 425 |             | COG0443 | O   |                     | No  | No  |
| Insoluble / Pellet / Soluble / Supernatant | 2005597830 | pfam00012                               | Molecular chaperone                                                     | 202 |             | COG0443 | O   |                     | No  | No  |
| Insoluble / Supernatant                    | 2005608796 | pfam00012                               | Molecular chaperone                                                     | 190 |             | COG0443 | O   |                     | No  | No  |
| Pellet                                     | 2005565494 | pfam00012                               | Molecular chaperone                                                     | 383 |             | COG0443 | O   |                     | No  | No  |
| Pellet                                     | 2005573201 | pfam00012                               | Molecular chaperone                                                     | 397 |             | COG0443 | O   |                     | No  | No  |
| Pellet                                     | 2005588763 | pfam00012                               | Molecular chaperone                                                     | 535 | EC:3.6.1.-  | COG0443 | O   |                     | No  | No  |
| Pellet / Supernatant                       | 2005565901 | pfam00012                               | Molecular chaperone                                                     | 250 |             | COG0443 | O   |                     | No  | No  |
| Soluble                                    | 2005584076 | pfam00012                               | Molecular chaperone                                                     | 396 |             | COG0443 | O   |                     | Yes | No  |
| Soluble                                    | 2005584942 | pfam00012                               | Molecular chaperone                                                     | 638 | EC:3.6.1.-  | COG0443 | O   | TIGR02350 TIGR01435 | No  | No  |
| Soluble / Supernatant                      | 2005587423 | pfam00012                               | Molecular chaperone                                                     | 645 | EC:3.6.1.-  | COG0443 | O   | TIGR02350           | No  | No  |

|                                  |            |                                         |                                                                             |     |                        |         |   |           |     |     |
|----------------------------------|------------|-----------------------------------------|-----------------------------------------------------------------------------|-----|------------------------|---------|---|-----------|-----|-----|
| Supernatant                      | 2005588859 | pfam00012                               | Molecular chaperone                                                         | 347 |                        | COG0443 | O |           | No  | No  |
| Supernatant / Soluble            | 2005565902 | pfam00012                               | Molecular chaperone                                                         | 335 |                        | COG0443 | O |           | No  | No  |
| Supernatant / Soluble            | 2005567281 | pfam00012                               | Molecular chaperone                                                         | 254 |                        | COG0443 | O |           | No  | No  |
| Pellet                           | 2005562960 | pfam00183 pfam02518                     | Molecular chaperone, HSP90 family                                           | 501 | EC:3.6.4.9             | COG0326 | O |           | No  | No  |
| Pellet                           | 2005570978 | pfam00183 pfam02518                     | Molecular chaperone, HSP90 family                                           | 439 |                        | COG0326 | O |           | No  | No  |
| Pellet / Supernatant             | 2005583923 | pfam00183                               | Molecular chaperone, HSP90 family                                           | 459 |                        | COG0326 | O |           | No  | No  |
| Global                           | 2005565106 | pfam07726                               | MoxR-like ATPases                                                           | 274 | EC:3.6.3.-             | COG0714 | R |           | No  | No  |
| Pellet                           | 2005561737 | pfam07726                               | MoxR-like ATPases                                                           | 322 | EC:3.6.3.-             | COG0714 | R |           | No  | No  |
| Pellet                           | 2005566904 | pfam07726                               | MoxR-like ATPases                                                           | 328 | EC:3.6.3.-             | COG0714 | R |           | No  | No  |
| Pellet                           | 2005570897 | pfam07726                               | MoxR-like ATPases                                                           | 315 | EC:3.6.3.-             | COG0714 | R |           | No  | No  |
| Pellet                           | 2005577071 | pfam07726                               | MoxR-like ATPases                                                           | 334 | EC:3.6.3.-             | COG0714 | R |           | No  | No  |
| Pellet                           | 2005626503 | pfam07726                               | MoxR-like ATPases                                                           | 246 |                        | COG0714 | R |           | No  | No  |
| Soluble                          | 2005570159 | pfam07726                               | MoxR-like ATPases                                                           | 255 |                        | COG0714 | R |           | No  | No  |
| Supernatant                      | 2005588512 | pfam07726                               | MoxR-like ATPases                                                           | 379 | EC:3.6.3.-             | COG0714 | R |           | No  | No  |
| Supernatant                      | 2005613598 | pfam07726                               | MoxR-like ATPases                                                           | 234 |                        | COG0714 | R | Yes       | No  | No  |
| Soluble                          | 2005560403 |                                         | Mu-like prophage Flumu protein gp28                                         | 267 |                        | COG4373 | R |           | No  | No  |
| Pellet / Global                  | 2005560602 | pfam06274                               | Mu-like prophage tail sheath protein gpL                                    | 312 |                        | COG4386 | R |           | No  | No  |
| Soluble                          | 2005579084 | pfam03358                               | Multimeric flavodoxin WrhA                                                  | 212 |                        | COG0655 | R | Yes       | No  | No  |
| Pellet / Supernatant / Global    | 2005567943 | pfam01235                               | Na+/alanine symporter                                                       | 470 | EC:4.1.1.65            | COG1115 | E | TIGR00835 | No  | Yes |
| Supernatant                      | 2005623555 | pfam07690                               | Na+/melibiose symporter and related transporters                            | 283 |                        | COG2211 | G |           | No  | Yes |
| Global                           | 2005563167 | pfam01895 pfam02690                     | Na+/phosphate symporter                                                     | 574 |                        | COG1283 | P | TIGR00704 | Yes | Yes |
| Pellet                           | 2005561173 | pfam01554                               | Na+-driven multidrug efflux pump                                            | 162 |                        | COG0534 | V |           | No  | Yes |
| Pellet / Supernatant             | 2005562244 | pfam03977                               | Na+-transporting methylmalonyl-CoA/oxaloacetate d carboxylase, beta subunit | 460 | EC:4.1.1.3             | COG1883 | C | TIGR01109 | Yes | Yes |
| Soluble                          | 2005630210 | pfam01520                               | N-acetylmuramoyl-L-alanine amidase                                          | 285 | EC:3.5.1.28            | COG0860 | M |           | No  | No  |
| Supernatant                      | 2005598270 | pfam02540                               | NAD synthase                                                                | 185 |                        | COG0171 | H | TIGR00552 | No  | No  |
| Supernatant                      | 2005570729 | pfam01134                               | NAD/FAD-utilizing enzyme apparently involved in c ell division              | 602 |                        | COG0445 | D | TIGR00136 | No  | No  |
| Global                           | 2005577261 | pfam00171 pfam00465                     | NAD-dependent aldehyde dehydrogenases                                       | 855 | EC:1.1.1.1 EC:1.2.1.10 | COG1454 | C |           | Yes | No  |
| Global / Pellet                  | 2005570640 | pfam00171 pfam00465                     | NAD-dependent aldehyde dehydrogenases                                       | 867 | EC:1.1.1.1 EC:1.2.1.10 | COG1454 | C |           | No  | No  |
| Global / Pellet / Supernatant    | 2005573383 | pfam00465                               | NAD-dependent aldehyde dehydrogenases                                       | 815 | EC:1.1.1.1 EC:1.2.1.10 | COG1454 | C |           | No  | No  |
| Pellet                           | 2005577363 | pfam00171 pfam00465                     | NAD-dependent aldehyde dehydrogenases                                       | 863 | EC:1.1.1.1 EC:1.2.1.10 | COG1454 | C |           | No  | No  |
| Pellet                           | 2005582621 | pfam00465                               | NAD-dependent aldehyde dehydrogenases                                       | 647 | EC:1.2.1.10            | COG1454 | C |           | No  | No  |
| Pellet                           | 2005586726 | pfam00171                               | NAD-dependent aldehyde dehydrogenases                                       | 382 | EC:1.2.1.16            | COG1012 | C |           | No  | No  |
| Pellet                           | 2005593836 | pfam00171 pfam00465                     | NAD-dependent aldehyde dehydrogenases                                       | 867 | EC:1.1.1.1 EC:1.2.1.10 | COG1454 | C |           | No  | No  |
| Pellet / Supernatant             | 2005581299 |                                         | NAD-dependent aldehyde dehydrogenases                                       | 353 |                        | COG1012 | C |           | No  | No  |
| Pellet / Supernatant / Global    | 2005565069 |                                         | NAD-dependent aldehyde dehydrogenases                                       | 265 |                        | COG1012 | C |           | No  | No  |
| Supernatant / Soluble / Global   | 2005561303 | pfam00465                               | NAD-dependent aldehyde dehydrogenases                                       | 488 |                        | COG1012 | C | Yes       | No  | No  |
| Supernatant                      | 2005572775 | pfam00533 pfam01653 pfam03119 pfam03120 | NAD-dependent DNA ligase (contains BRCT domain ty pe II)                    | 569 | EC:6.5.1.2             | COG0272 | L | TIGR00575 | No  | No  |
| Supernatant                      | 2005586739 | pfam02146                               | NAD-dependent protein deacetylases, SIR2 family                             | 245 | EC:3.5.1.-             | COG0846 | K |           | No  | No  |
| Global                           | 2005575055 | pfam00037 pfam10531 pfam10589           | NADH                                                                        | 269 |                        | COG1894 | C |           | No  | No  |
| Global                           | 2005620597 |                                         | NADH                                                                        | 190 |                        | COG1894 | C |           | No  | No  |
| Global / Insoluble / Soluble     | 2005594378 | pfam01512 pfam10531 pfam10589           | NADH                                                                        | 604 | EC:1.6.5.3             | COG1894 | C |           | No  | No  |
| Global / Insoluble / Supernatant | 2005576124 | pfam01512 pfam10531 pfam10589           | NADH                                                                        | 532 | EC:1.6.5.3 EC:1.6.99.5 | COG1894 | C |           | No  | No  |
| Global / Soluble / Supernatant   | 2005569582 | pfam01512 pfam10531 pfam10589           | NADH                                                                        | 480 | EC:1.6.5.3 EC:1.6.99.5 | COG1894 | C |           | No  | No  |
| Insoluble / Pellet / Soluble     | 2005580430 | pfam01512 pfam10531 pfam10589           | NADH                                                                        | 402 | EC:1.6.99.5            | COG1894 | C |           | No  | No  |
| Pellet                           | 2005573141 | pfam01512 pfam10531 pfam10589           | NADH                                                                        | 521 | EC:1.6.5.3 EC:1.6.99.5 | COG1894 | C |           | No  | No  |
| Pellet                           | 2005573142 | pfam10589                               | NADH                                                                        | 225 |                        | COG1894 | C |           | No  | No  |
| Pellet                           | 2005576012 | pfam00037 pfam01512 pfam10531 pfam10589 | NADH                                                                        | 587 | EC:1.6.5.3 EC:1.6.99.5 | COG1894 | C |           | No  | No  |
| Pellet                           | 2005576133 | pfam00037 pfam01512 pfam10531 pfam10589 | NADH                                                                        | 604 | EC:1.6.5.3             | COG1894 | C |           | No  | No  |
| Pellet                           | 2005580124 | pfam01512 pfam10531 pfam10589           | NADH                                                                        | 595 | EC:1.6.5.3             | COG1894 | C |           | No  | No  |
| Pellet                           | 2005592590 | pfam01512 pfam10531                     | NADH                                                                        | 378 |                        | COG1894 | C |           | No  | No  |
| Pellet / Supernatant             | 2005612246 | pfam01257                               | NADH                                                                        | 174 | EC:1.6.5.3             | COG1905 | C |           | No  | No  |
| Pellet / Supernatant / Soluble   | 2005615063 | pfam01512 pfam10531                     | NADH                                                                        | 286 |                        | COG1894 | C |           | No  | No  |
| Soluble                          | 2005580122 | pfam01512 pfam10531 pfam10589           | NADH                                                                        | 505 | EC:1.6.5.3 EC:1.6.99.5 | COG1894 | C |           | No  | No  |
| Soluble                          | 2005583600 | pfam01512 pfam10531                     | NADH                                                                        | 228 |                        | COG1894 | C |           | No  | No  |
| Supernatant                      | 2005560274 | pfam01512                               | NADH                                                                        | 320 |                        | COG1894 | C |           | No  | No  |
| Supernatant                      | 2005587541 | pfam10589                               | NADH                                                                        | 154 |                        | COG1894 | C |           | No  | No  |
| Supernatant                      | 2005593567 | pfam01257                               | NADH                                                                        | 165 | EC:1.6.5.3             | COG1905 | C |           | No  | No  |
| Soluble                          | 2005583380 | pfam00111 pfam10588                     | NADH dehydrogenase/NADH                                                     | 197 |                        | COG1034 | C |           | No  | No  |
| Soluble / Supernatant            | 2005609100 | pfam00037 pfam02906 pfam10588           | NADH dehydrogenase/NADH                                                     | 268 |                        | COG3383 | R |           | No  | No  |
| Soluble                          | 2005596471 |                                         | Nicotinic acid phosphoribosyltransferase                                    | 280 |                        | COG1488 | H | TIGR01513 | No  | No  |
| Pellet                           | 2005583183 | pfam01592 pfam04324                     | NiFU homolog involved in Fe-S cluster formation                             | 92  |                        | COG1251 | C |           | No  | No  |
| Pellet / Insoluble               | 2005562851 |                                         | NiFU homolog involved in Fe-S cluster formation                             | 134 |                        |         |   |           | No  | No  |
| Global                           | 2005565551 | pfam00543                               | Nitrogen regulatory protein PII                                             | 114 |                        | COG0347 | E |           | No  | No  |
| Global / Insoluble / Soluble     | 2005591093 | pfam00543                               | Nitrogen regulatory protein PII                                             | 134 |                        | COG0347 | E |           | No  | No  |
| Global / Pellet                  | 2005593253 | pfam00543                               | Nitrogen regulatory protein PII                                             | 165 |                        | COG0347 | E |           | No  | No  |
| Insoluble / Pellet               | 2005573268 | pfam00543                               | Nitrogen regulatory protein PII                                             | 70  |                        | COG0347 | E |           | No  | No  |
| Insoluble / Soluble / Global     | 2005560223 | pfam00543                               | Nitrogen regulatory protein PII                                             | 108 |                        | COG0347 | E |           | No  | No  |
| Pellet                           | 2005567102 | pfam00543                               | Nitrogen regulatory protein PII                                             | 150 |                        | COG0347 | E |           | No  | No  |
| Pellet                           | 2005574077 | pfam00543                               | Nitrogen regulatory protein PII                                             | 131 |                        | COG0347 | E |           | No  | No  |
| Pellet                           | 2005591091 | pfam00543                               | Nitrogen regulatory protein PII                                             | 66  |                        | COG0347 | E |           | No  | No  |
| Pellet                           | 2005627066 | pfam00543                               | Nitrogen regulatory protein PII                                             | 111 |                        | COG0347 | E |           | No  | No  |
| Pellet / Soluble                 | 2005582410 | pfam00543                               | Nitrogen regulatory protein PII                                             | 114 |                        | COG0347 | E |           | No  | No  |
| Pellet / Soluble / Supernatant   | 2005574074 | pfam00543                               | Nitrogen regulatory protein PII                                             | 108 |                        | COG0347 | E |           | No  | No  |
| Pellet / Soluble / Supernatant   | 2005591090 | pfam00543                               | Nitrogen regulatory protein PII                                             | 133 |                        | COG0347 | E |           | No  | No  |
| Soluble                          | 2005617073 | pfam00543                               | Nitrogen regulatory protein PII                                             | 107 |                        | COG0347 | E |           | No  | No  |
| Soluble                          | 2005628534 | pfam00543                               | Nitrogen regulatory protein PII                                             | 131 |                        | COG0347 | E |           | No  | No  |
| Soluble / Supernatant            | 2005590496 | pfam00543                               | Nitrogen regulatory protein PII                                             | 107 |                        | COG0347 | E |           | No  | No  |
| Supernatant / Insoluble          | 2005615906 | pfam00543 pfam00909                     | Nitrogen regulatory protein PII                                             | 216 |                        | COG0347 | E | Yes       | Yes | Yes |
| Pellet                           | 2005560226 | pfam00148                               | Nitrogenase molybdenum-iron protein, alpha and beta chains                  | 372 | EC:1.18.6.1            | COG2710 | C |           | No  | No  |
| Pellet                           | 2005562919 | pfam00148                               | Nitrogenase molybdenum-iron protein, alpha and beta chains                  | 328 |                        | COG2710 | C |           | No  | No  |
| Pellet                           | 2005591089 | pfam00148                               | Nitrogenase molybdenum-iron protein, alpha and beta chains                  | 351 |                        | COG2710 | C | TIGR01862 | No  | No  |
| Pellet / Soluble                 | 2005566209 | pfam00148                               | Nitrogenase molybdenum-iron protein, alpha and beta chains                  | 247 |                        | COG2710 | C |           | No  | No  |
| Supernatant                      | 2005573271 | pfam00148                               | Nitrogenase molybdenum-iron protein, alpha and beta chains                  | 281 |                        | COG2710 | C |           | No  | No  |
| Global                           | 2005590497 | pfam00142                               | Nitrogenase subunit NiH (ATPase)                                            | 191 |                        | COG1348 | P | TIGR01287 | No  | No  |
| Insoluble                        | 2005574073 | pfam00142                               | Nitrogenase subunit NiH (ATPase)                                            | 272 | EC:1.18.6.1            | COG1348 | P | TIGR01287 | No  | No  |
| Pellet                           | 2005617074 | pfam00142                               | Nitrogenase subunit NiH (ATPase)                                            | 93  |                        | COG1348 | P |           | No  | No  |
| Supernatant                      | 2005602390 | pfam00142                               | Nitrogenase subunit NiH (ATPase)                                            | 272 | EC:1.18.6.1            | COG1348 | P | TIGR01287 | No  | No  |

|                                |            |                               |                                                                                 |  |     |                        |         |   |                     |     |     |
|--------------------------------|------------|-------------------------------|---------------------------------------------------------------------------------|--|-----|------------------------|---------|---|---------------------|-----|-----|
| Soluble / Supernatant          | 2005595363 | pfam00881                     | Nitroreductase                                                                  |  | 214 |                        | COG0778 | C |                     | No  | No  |
| Pellet                         | 2005616231 | pfam00293 pfam09297           | NTP pyrophosphohydrolases containing a Zn-finger, probably nucleic-acid-binding |  | 246 | EC:3.6.1.-             | COG2816 | L |                     | No  | No  |
| Soluble                        | 2005590583 | pfam00334                     | Nucleoside diphosphate kinase                                                   |  | 150 | EC:2.7.4.6             | COG0105 | F |                     | No  | No  |
| Soluble / Supernatant          | 2005587460 | pfam00334                     | Nucleoside diphosphate kinase                                                   |  | 150 | EC:2.7.4.6             | COG0105 | F |                     | No  | No  |
| Supernatant                    | 2005571806 | pfam00334                     | Nucleoside diphosphate kinase                                                   |  | 150 | EC:2.7.4.6             | COG0105 | F |                     | Yes | No  |
| Soluble                        | 2005609750 | pfam01048                     | Nucleoside phosphorylase                                                        |  | 218 | EC:3.2.2.16 EC:3.2.2.9 | COG0775 | F | TIGR01704           | No  | No  |
| Global                         | 2005565048 | pfam01053                     | O-acetylhomoserine sulfhydrylase                                                |  | 395 | EC:1.4.1.1 EC:2.5.1.49 | COG2873 | E | TIGR01326           | No  | No  |
| Global                         | 2005591832 | pfam01053                     | O-acetylhomoserine sulfhydrylase                                                |  | 411 | EC:1.4.1.1 EC:2.5.1.49 | COG2873 | E | TIGR01326           | Yes | No  |
| Pellet                         | 2005582619 | pfam01053                     | O-acetylhomoserine sulfhydrylase                                                |  | 210 |                        | COG2873 | E |                     | No  | No  |
| Pellet / Soluble               | 2005566788 | pfam01053                     | O-acetylhomoserine sulfhydrylase                                                |  | 364 | EC:2.5.1.49            | COG2873 | E | TIGR01326           | Yes | No  |
| Pellet / Supernatant / Soluble | 2005617895 | pfam01053                     | O-acetylhomoserine sulfhydrylase                                                |  | 244 |                        | COG2873 | E |                     | No  | No  |
| Soluble                        | 2005576037 | pfam01053                     | O-acetylhomoserine sulfhydrylase                                                |  | 330 | EC:1.4.1.1 EC:2.5.1.49 | COG2873 | E | TIGR01326           | No  | No  |
| Supernatant                    | 2005596057 | pfam01053                     | O-acetylhomoserine sulfhydrylase                                                |  | 129 |                        | COG2873 | E |                     | No  | No  |
| Supernatant / Soluble          | 2005626526 | pfam01053                     | O-acetylhomoserine sulfhydrylase                                                |  | 253 |                        | COG2873 | E |                     | No  | No  |
| Pellet                         | 2005612537 |                               | O-Glycosyl hydrolase                                                            |  | 280 |                        | COG5520 | M |                     | No  | No  |
| Pellet / Supernatant           | 2005598345 |                               | O-Glycosyl hydrolase                                                            |  | 269 |                        | COG5520 | M |                     | No  | No  |
| Pellet / Supernatant           | 2005622885 |                               | O-Glycosyl hydrolase                                                            |  | 213 |                        | COG5520 | M |                     | Yes | No  |
| Soluble                        | 2005582253 | pfam01432                     | Oligoendopeptidase F                                                            |  | 287 |                        | COG1164 | E | TIGR02289           | No  | No  |
| Soluble                        | 2005587668 | pfam01432                     | Oligoendopeptidase F                                                            |  | 394 |                        | COG1164 | E | TIGR00181           | No  | No  |
| Soluble                        | 2005628700 | pfam01432 pfam08439           | Oligoendopeptidase F                                                            |  | 237 |                        | COG1164 | E |                     | No  | No  |
| Global                         | 2005612433 |                               | OmpA family protein                                                             |  | 264 |                        |         |   |                     | No  | No  |
| Pellet                         | 2005569836 |                               | OmpA family protein                                                             |  | 731 |                        |         |   |                     | No  | No  |
| Pellet                         | 2005612505 | pfam02369 pfam07715           | OmpA-related protein                                                            |  | 241 |                        |         |   |                     | Yes | No  |
| Pellet                         | 2005560513 | pfam00185 pfam02729           | Ornithine carbamoyltransferase                                                  |  | 338 | EC:2.1.3.3             | COG0078 | E | TIGR03316           | No  | No  |
| Soluble                        | 2005574229 | pfam02729                     | Ornithine carbamoyltransferase                                                  |  | 123 |                        | COG0078 | E |                     | No  | No  |
| Soluble                        | 2005574230 |                               | Ornithine carbamoyltransferase                                                  |  | 165 |                        | COG0078 | E |                     | No  | No  |
| Soluble                        | 2005584813 | pfam00185 pfam02729           | Ornithine carbamoyltransferase                                                  |  | 339 | EC:2.1.3.3             | COG0078 | E | TIGR03316           | No  | No  |
| Soluble / Supernatant          | 2005586062 | pfam00185 pfam02729           | Ornithine carbamoyltransferase                                                  |  | 308 | EC:2.1.3.3             | COG0078 | E | TIGR00658           | No  | No  |
| Soluble                        | 2005601073 | pfam00202                     | Ornithine/acetylornithine aminotransferase                                      |  | 257 |                        | COG4992 | E |                     | No  | No  |
| Soluble                        | 2005613422 | pfam00202                     | Ornithine/acetylornithine aminotransferase                                      |  | 225 |                        | COG4992 | E |                     | No  | No  |
| Supernatant                    | 2005569309 | pfam00202                     | Ornithine/acetylornithine aminotransferase                                      |  | 397 | EC:2.6.1.11            | COG4992 | E | TIGR00707           | No  | No  |
| Supernatant / Soluble          | 2005564708 | pfam00156                     | Orotate phosphoribosyltransferase                                               |  | 194 | EC:2.4.2.10            | COG0461 | F | TIGR00336 TIGR01367 | No  | No  |
| Pellet                         | 2005567017 |                               | Outer membrane assembly protein                                                 |  | 487 |                        |         |   |                     | Yes | No  |
| Pellet                         | 2005602173 |                               | Outer membrane assembly protein                                                 |  | 270 |                        |         |   |                     | No  | No  |
| Soluble                        | 2005572185 | pfam03938                     | Outer membrane protein                                                          |  | 175 |                        | COG2825 | M |                     | Yes | No  |
| Pellet                         | 2005569187 | pfam00691                     | Outer membrane protein and related peptidoglycan-associated (lipo)proteins      |  | 286 |                        | COG2885 | M |                     | No  | No  |
| Pellet                         | 2005627866 | pfam00691                     | Outer membrane protein and related peptidoglycan-associated (lipo)proteins      |  | 218 |                        | COG2885 | M |                     | No  | No  |
| Pellet / Soluble / Supernatant | 2005595026 | pfam00691                     | Outer membrane protein and related peptidoglycan-associated (lipo)proteins      |  | 313 |                        | COG2885 | M |                     | Yes | No  |
| Soluble                        | 2005586362 | pfam00691                     | Outer membrane protein and related peptidoglycan-associated (lipo)proteins      |  | 179 |                        | COG2885 | M | TIGR02802           | Yes | No  |
| Supernatant                    | 2005607130 | pfam00691                     | Outer membrane protein and related peptidoglycan-associated (lipo)proteins      |  | 164 |                        | COG2885 | M |                     | No  | No  |
| Supernatant                    | 2005632230 | pfam00691                     | Outer membrane protein and related peptidoglycan-associated (lipo)proteins      |  | 197 |                        | COG2885 | M |                     | No  | No  |
| Soluble / Supernatant          | 2005594451 |                               | Oxidoreductase, Gfo/Ith/MocA family                                             |  | 319 |                        | COG0673 | R |                     | Yes | No  |
| Pellet                         | 2005600531 |                               | Parvulin-like peptidyl-prolyl isomerase                                         |  | 256 |                        |         |   |                     | No  | No  |
| Soluble                        | 2005600170 |                               | Parvulin-like peptidyl-prolyl isomerase                                         |  | 236 |                        |         |   |                     | No  | No  |
| Soluble                        | 2005614797 | pfam00639                     | Parvulin-like peptidyl-prolyl isomerase                                         |  | 287 |                        |         |   |                     | No  | No  |
| Pellet                         | 2005586060 | pfam00544                     | Pectate lyase                                                                   |  | 403 |                        | COG3866 | G |                     | No  | No  |
| Soluble                        | 2005621641 | pfam00544                     | Pectate lyase                                                                   |  | 266 |                        | COG3866 | G |                     | Yes | No  |
| Soluble                        | 2005623549 | pfam00160 pfam00254           | Peptidyl-prolyl cis-trans isomerase (rotamase) - cyclophilin family             |  | 275 |                        | COG0652 | O |                     | No  | No  |
| Supernatant                    | 2005589716 | pfam00160 pfam00254           | Peptidyl-prolyl cis-trans isomerase (rotamase) - cyclophilin family             |  | 317 |                        | COG0652 | O |                     | No  | No  |
| Pellet                         | 2005567638 | pfam01195                     | Peptidyl-tRNA hydrolase                                                         |  | 153 |                        | COG0193 | J | TIGR00447           | No  | No  |
| Pellet                         | 2005605127 | pfam00595 pfam03572           | Periplasmic protease                                                            |  | 263 |                        | COG0793 | M | TIGR00225           | No  | No  |
| Soluble                        | 2005564303 | pfam03572                     | Periplasmic protease                                                            |  | 271 |                        | COG0793 | M |                     | No  | No  |
| Pellet                         | 2005561564 |                               | Phenylalanyl-tRNA synthetase beta subunit                                       |  | 242 |                        | COG0072 | J |                     | No  | No  |
| Pellet                         | 2005630407 | pfam03483 pfam03484           | Phenylalanyl-tRNA synthetase beta subunit                                       |  | 243 |                        | COG0072 | J |                     | No  | No  |
| Global / Pellet / Supernatant  | 2005568501 | pfam01895                     | Phosphate uptake regulator                                                      |  | 217 |                        | COG0704 | P | TIGR02135           | No  | No  |
| Pellet                         | 2005562506 | pfam01895                     | Phosphate uptake regulator                                                      |  | 154 |                        | COG0704 | P |                     | No  | No  |
| Pellet                         | 2005568349 | pfam01895                     | Phosphate uptake regulator                                                      |  | 201 |                        | COG0704 | P | TIGR02135           | No  | No  |
| Soluble                        | 2005627637 | pfam01895                     | Phosphate uptake regulator                                                      |  | 225 |                        | COG0704 | P | TIGR02135           | No  | No  |
| Soluble                        | 2005575672 | pfam02493                     | Phosphatidylinositol-4-phosphate 5-kinase isolog, 89655-95590                   |  | 75  |                        | COG4642 | S |                     | No  | No  |
| Pellet                         | 2005615525 | pfam02666                     | Phosphatidylserine decarboxylase                                                |  | 215 | EC:4.1.1.65            | COG0688 | I | TIGR00164           | Yes | Yes |
| Pellet                         | 2005629430 | pfam02666                     | Phosphatidylserine decarboxylase                                                |  | 233 | EC:4.1.1.65            | COG0688 | I |                     | No  | No  |
| Global                         | 2005574631 | pfam00821                     | Phosphoenolpyruvate carboxykinase (GTP)                                         |  | 155 |                        | COG1274 | C |                     | Yes | No  |
| Global                         | 2005614675 | pfam00821                     | Phosphoenolpyruvate carboxykinase (GTP)                                         |  | 278 |                        | COG1274 | C |                     | No  | No  |
| Global / Insoluble             | 2005574630 | pfam00821                     | Phosphoenolpyruvate carboxykinase (GTP)                                         |  | 235 |                        | COG1274 | C |                     | No  | No  |
| Global / Pellet / Supernatant  | 2005596347 | pfam00821                     | Phosphoenolpyruvate carboxykinase (GTP)                                         |  | 267 |                        | COG1274 | C |                     | No  | No  |
| Global / Soluble               | 2005593944 | pfam00821                     | Phosphoenolpyruvate carboxykinase (GTP)                                         |  | 449 | EC:4.1.1.32            | COG1274 | C |                     | No  | No  |
| Global / Supernatant           | 2005608577 | pfam00821                     | Phosphoenolpyruvate carboxykinase (GTP)                                         |  | 310 |                        | COG1274 | C |                     | No  | No  |
| Pellet                         | 2005564687 | pfam00821                     | Phosphoenolpyruvate carboxykinase (GTP)                                         |  | 98  |                        | COG1274 | C |                     | No  | No  |
| Pellet                         | 2005589420 | pfam00821                     | Phosphoenolpyruvate carboxykinase (GTP)                                         |  | 417 |                        | COG1274 | C |                     | No  | No  |
| Pellet                         | 2005609978 | pfam00821                     | Phosphoenolpyruvate carboxykinase (GTP)                                         |  | 249 |                        | COG1274 | C |                     | Yes | No  |
| Pellet                         | 2005629230 | pfam00821                     | Phosphoenolpyruvate carboxykinase (GTP)                                         |  | 256 |                        | COG1274 | C |                     | No  | No  |
| Pellet / Supernatant           | 2005604204 | pfam00821                     | Phosphoenolpyruvate carboxykinase (GTP)                                         |  | 267 |                        | COG1274 | C |                     | No  | No  |
| Soluble / Supernatant          | 2005598987 | pfam00821                     | Phosphoenolpyruvate carboxykinase (GTP)                                         |  | 260 |                        | COG1274 | C |                     | No  | No  |
| Supernatant                    | 2005581220 | pfam00821                     | Phosphoenolpyruvate carboxykinase (GTP)                                         |  | 276 |                        | COG1274 | C |                     | No  | No  |
| Supernatant                    | 2005627748 | pfam00821                     | Phosphoenolpyruvate carboxykinase (GTP)                                         |  | 275 |                        | COG1274 | C |                     | No  | No  |
| Global                         | 2005565379 | pfam02896                     | Phosphoenolpyruvate synthase/pyruvate phosphate dikinase                        |  | 212 |                        | COG0574 | G |                     | No  | No  |
| Global / Pellet                | 2005590477 | pfam00391 pfam01326 pfam02896 | Phosphoenolpyruvate synthase/pyruvate phosphate dikinase                        |  | 701 |                        | COG0574 | G | TIGR01828           | No  | No  |
| Global / Pellet / Supernatant  | 2005587662 | pfam02896                     | Phosphoenolpyruvate synthase/pyruvate phosphate dikinase                        |  | 294 |                        | COG0574 | G |                     | No  | No  |
| Global / Supernatant           | 2005572679 | pfam00391 pfam01326           | Phosphoenolpyruvate synthase/pyruvate phosphate dikinase                        |  | 509 |                        | COG0574 | G | TIGR01828           | No  | No  |
| Insoluble                      | 2005563106 | pfam00391 pfam01326           | Phosphoenolpyruvate synthase/pyruvate phosphate dikinase                        |  | 391 |                        | COG0574 | G | TIGR01828           | No  | No  |
| Insoluble                      | 2005587645 | pfam02896                     | Phosphoenolpyruvate synthase/pyruvate phosphate dikinase                        |  | 376 |                        | COG0574 | G | TIGR01828           | No  | No  |
| Insoluble / Global             | 2005562387 | pfam00391 pfam02896           | Phosphoenolpyruvate synthase/pyruvate phosphate dikinase                        |  | 451 |                        | COG0574 | G | TIGR01828           | No  | No  |
| Insoluble / Pellet             | 2005570714 | pfam00391 pfam01326 pfam02896 | Phosphoenolpyruvate synthase/pyruvate phosphate dikinase                        |  | 896 | EC:2.7.9.1             | COG0574 | G | TIGR01828           | No  | No  |
| Insoluble / Soluble            | 2005577393 | pfam00391 pfam02896           | Phosphoenolpyruvate synthase/pyruvate phosphate dikinase                        |  | 512 |                        | COG0574 | G | TIGR01828           | No  | No  |
| Pellet                         | 2005561201 | pfam00391 pfam01326 pfam02896 | Phosphoenolpyruvate synthase/pyruvate phosphate dikinase                        |  | 836 | EC:2.7.9.1             | COG0574 | G | TIGR01828           | No  | No  |
| Pellet                         | 2005561999 | pfam01326                     | Phosphoenolpyruvate synthase/pyruvate phosphate dikinase                        |  | 300 |                        | COG0574 | G |                     | No  | No  |
| Pellet                         | 2005566286 | pfam01326                     | Phosphoenolpyruvate synthase/pyruvate phosphate dikinase                        |  | 438 |                        | COG0574 | G |                     | No  | No  |

|                                           |            |                                                   |                                                                                                      |     |              |         |       |                     |     |     |
|-------------------------------------------|------------|---------------------------------------------------|------------------------------------------------------------------------------------------------------|-----|--------------|---------|-------|---------------------|-----|-----|
| Pellet                                    | 2005569228 | pfam01326                                         | Phosphoenolpyruvate synthase/pyruvate phosphate d ikinase                                            | 300 |              |         |       |                     | No  | No  |
| Pellet                                    | 2005576408 | pfam01326                                         | Phosphoenolpyruvate synthase/pyruvate phosphate d ikinase                                            | 230 |              |         |       |                     | No  | No  |
| Pellet / Global                           | 2005625137 | pfam00391 pfam01326                               | Phosphoenolpyruvate synthase/pyruvate phosphate d ikinase                                            | 268 |              | COG0574 | G     |                     | No  | No  |
| Pellet / Supernatant                      | 2005581086 | pfam00391 pfam01326 pfam02896                     | Phosphoenolpyruvate synthase/pyruvate phosphate d ikinase                                            | 474 |              | COG0574 | G     |                     | No  | No  |
| Pellet / Supernatant                      | 2005591330 | pfam02896                                         | Phosphoenolpyruvate synthase/pyruvate phosphate d ikinase                                            | 434 |              | COG0574 | G     | TIGR01828           | No  | No  |
| Pellet / Supernatant                      | 2005631546 | pfam02896                                         | Phosphoenolpyruvate synthase/pyruvate phosphate d ikinase                                            | 269 |              | COG0574 | G     |                     | No  | No  |
| Pellet / Supernatant / Global             | 2005562000 | pfam02896                                         | Phosphoenolpyruvate synthase/pyruvate phosphate d ikinase                                            | 191 |              | COG0574 | G     |                     | No  | No  |
| Pellet / Supernatant / Insoluble          | 2005630794 | pfam01326                                         | Phosphoenolpyruvate synthase/pyruvate phosphate d ikinase                                            | 259 |              | COG0574 | G     |                     | No  | No  |
| Pellet / Supernatant / Insoluble / Global | 2005561152 | pfam02896                                         | Phosphoenolpyruvate synthase/pyruvate phosphate d ikinase                                            | 215 |              | COG0574 | G     |                     | No  | No  |
| Soluble                                   | 2005576674 | pfam00391 pfam01326 pfam02896                     | Phosphoenolpyruvate synthase/pyruvate phosphate d ikinase                                            | 618 |              | COG0574 | G     | TIGR01828           | No  | No  |
| Soluble                                   | 2005585875 | pfam02896                                         | Phosphoenolpyruvate synthase/pyruvate phosphate d ikinase                                            | 210 |              | COG0574 | G     |                     | No  | No  |
| Supernatant                               | 2005569156 | pfam00391 pfam01326                               | Phosphoenolpyruvate synthase/pyruvate phosphate d ikinase                                            | 412 |              | COG0574 | G     |                     | No  | No  |
| Supernatant                               | 2005615741 | pfam02896                                         | Phosphoenolpyruvate synthase/pyruvate phosphate d ikinase                                            | 268 |              | COG0574 | G     |                     | No  | No  |
| Insoluble                                 | 2005565255 | pfam00391 pfam05524                               | Phosphoenolpyruvate-protein kinase (PTS system EI component in bacteria)                             | 263 |              | COG1080 | G     |                     | No  | No  |
| Pellet                                    | 2005565254 | pfam00391 pfam02896                               | Phosphoenolpyruvate-protein kinase (PTS system EI component in bacteria)                             | 509 | EC:2.7.3.9   | COG1080 | G     | TIGR01417           | No  | No  |
| Pellet                                    | 2005582725 | pfam00391 pfam02896 pfam05524                     | Phosphoenolpyruvate-protein kinase (PTS system EI component in bacteria)                             | 585 | EC:2.7.3.9   | COG1080 | G     | TIGR01417           | No  | No  |
| Pellet                                    | 2005632671 | pfam02896                                         | Phosphoenolpyruvate-protein kinase (PTS system EI component in bacteria)                             | 152 |              | COG1080 | G     |                     | No  | No  |
| Global                                    | 2005568819 | pfam02826                                         | Phosphoglycerate dehydrogenase and related dehydr ogenases                                           | 306 | EC:1.1.1.95  | COG0111 | E H   |                     | No  | No  |
| Global                                    | 2005590349 | pfam02826                                         | Phosphoglycerate dehydrogenase and related dehydr ogenases                                           | 273 |              | COG0111 | H E   |                     | No  | No  |
| Insoluble / Supernatant                   | 2005575139 | pfam02826                                         | Phosphoglycerate dehydrogenase and related dehydr ogenases                                           | 322 | EC:1.1.1.95  | COG0111 | H E   |                     | No  | No  |
| Pellet                                    | 2005580371 | pfam02826                                         | Phosphoglycerate dehydrogenase and related dehydr ogenases                                           | 211 |              | COG0111 | E H   |                     | No  | No  |
| Pellet                                    | 2005631684 | pfam0389 pfam02826                                | Phosphoglycerate dehydrogenase and related dehydr ogenases                                           | 205 |              | COG1052 | C H R |                     | No  | No  |
| Pellet / Supernatant                      | 2005590130 | pfam02826                                         | Phosphoglycerate dehydrogenase and related dehydr ogenases                                           | 390 | EC:1.1.1.95  | COG0111 | H E   |                     | No  | No  |
| Soluble                                   | 200568468  | pfam02826                                         | Phosphoglycerate dehydrogenase and related dehydr ogenases                                           | 191 |              | COG0111 | H E   |                     | No  | No  |
| Soluble                                   | 2005588550 | pfam02826                                         | Phosphoglycerate dehydrogenase and related dehydr ogenases                                           | 350 | EC:1.1.1.95  | COG0111 | H E   |                     | No  | No  |
| Global / Pellet / Supernatant             | 2005573878 | pfam01676 pfam06415                               | Phosphoglyceromutase                                                                                 | 409 |              | COG0696 | G     | TIGR01307           | No  | No  |
| Pellet                                    | 2005578803 | pfam01676 pfam06415                               | Phosphoglyceromutase                                                                                 | 560 | EC:5.4.2.1   | COG0696 | G     | TIGR01307           | No  | No  |
| Pellet / Soluble                          | 2005561582 | pfam01676 pfam06415                               | Phosphoglyceromutase                                                                                 | 507 | EC:5.4.2.1   | COG0696 | G     | TIGR01307           | No  | No  |
| Pellet / Supernatant                      | 2005609579 | pfam06415                                         | Phosphoglyceromutase                                                                                 | 278 |              | COG0696 | G     | TIGR01307           | No  | No  |
| Supernatant                               | 2005569106 | pfam01676 pfam06415                               | Phosphoglyceromutase                                                                                 | 213 |              | COG0696 | G     | TIGR01307           | No  | No  |
| Supernatant                               | 2005612711 | pfam01676 pfam06415                               | Phosphoglyceromutase                                                                                 | 296 |              | COG0696 | G     | TIGR01307           | No  | No  |
| Supernatant / Soluble                     | 2005623550 | pfam06415                                         | Phosphoglyceromutase                                                                                 | 232 |              | COG0696 | G     | TIGR01307           | No  | No  |
| Pellet                                    | 2005572883 | pfam00408 pfam01704 pfam02879 pfam02880           | Phosphomannomutase                                                                                   | 635 |              | COG4284 | G     |                     | No  | No  |
| Pellet / Supernatant                      | 2005591977 | pfam02879 pfam02880                               | Phosphomannomutase                                                                                   | 347 |              | COG1109 | G     |                     | No  | No  |
| Pellet / Supernatant                      | 2005600423 | pfam02879                                         | Phosphomannomutase                                                                                   | 269 |              | COG1109 | G     |                     | Yes | No  |
| Pellet / Supernatant                      | 2005561893 | pfam02878                                         | Phosphomannomutase                                                                                   | 282 |              | COG1109 | G     |                     | No  | No  |
| Pellet / Supernatant / Soluble            | 2005562434 | pfam02879                                         | Phosphomannomutase                                                                                   | 356 |              | COG1109 | G     |                     | No  | No  |
| Soluble                                   | 2005603154 | pfam02878                                         | Phosphomannomutase                                                                                   | 120 |              | COG1109 | G     |                     | No  | No  |
| Soluble                                   | 2005609144 | pfam00408                                         | Phosphomannomutase                                                                                   | 228 |              | COG1109 | G     |                     | No  | No  |
| Soluble                                   | 2005612498 | pfam02878                                         | Phosphomannomutase                                                                                   | 271 |              | COG1109 | G     |                     | No  | No  |
| Supernatant                               | 2005587130 | pfam02878 pfam02879 pfam02880                     | Phosphomannomutase                                                                                   | 578 | EC:5.4.2.8   | COG1109 | G     |                     | No  | No  |
| Pellet                                    | 2005560414 | pfam01071 pfam02843 pfam02844                     | Phosphoribosylamine-glycine ligase                                                                   | 387 | EC:6.3.4.13  | COG0151 | F     | TIGR00877           | No  | No  |
| Pellet                                    | 2005570525 | pfam00586 pfam02769                               | Phosphoribosylaminoimidazole (AIR) synthetase                                                        | 347 | EC:6.3.3.1   | COG0150 | F     | TIGR00878           | No  | No  |
| Soluble                                   | 2005585658 | pfam02222                                         | Phosphoribosylaminoimidazole carboxylase (NCAIR s synthetase)                                        | 330 | EC:4.1.1.21  | COG0026 | F     | TIGR01161           | Yes | No  |
| Soluble                                   | 2005573422 | pfam01259                                         | Phosphoribosylaminoimidazolesuccinocarboxamide (S AICAR) synthase                                    | 192 |              | COG0152 | F     | TIGR00081           | No  | No  |
| Soluble                                   | 2005575621 | pfam01259                                         | Phosphoribosylaminoimidazolesuccinocarboxamide (S AICAR) synthase                                    | 289 | EC:6.3.2.6   | COG0152 | F     | TIGR00081           | No  | No  |
| Soluble                                   | 200582414  | pfam01259                                         | Phosphoribosylaminoimidazolesuccinocarboxamide (S AICAR) synthase                                    | 280 | EC:6.3.2.6   | COG0152 | F     | TIGR00081           | No  | No  |
| Soluble                                   | 2005591732 | pfam00697                                         | Phosphoribosylanthranilate isomerase                                                                 | 193 | EC:5.3.1.24  | COG0135 | E     |                     | No  | No  |
| Soluble                                   | 2005560322 | pfam00977 pfam01502 pfam01503                     | Phosphoribosylformimino-5-aminoimidazole carboxam ide ribonucleotide (ProFAR) isomerase              | 429 | EC:4.1.3.-   | COG0106 | E     | TIGR03188 TIGR03456 | No  | No  |
| Pellet / Supernatant                      | 2005561034 |                                                   | Phosphoribosylpyrophosphate synthetase                                                               | 290 |              | COG0462 | E F   | TIGR01251           | No  | No  |
| Soluble                                   | 2005574699 | pfam00156                                         | Phosphoribosylpyrophosphate synthetase                                                               | 151 |              | COG0462 | E F   |                     | No  | No  |
| Pellet                                    | 2005582017 | pfam00266                                         | Phosphoserine aminotransferase                                                                       | 360 | EC:2.6.1.52  | COG1932 | H E   | TIGR01364           | Yes | No  |
| Pellet / Soluble                          | 2005567203 | pfam00266                                         | Phosphoserine aminotransferase                                                                       | 221 |              | COG1932 | E H   | TIGR01364           | No  | No  |
| Pellet / Supernatant / Soluble / Global   | 2005622695 | pfam00266                                         | Phosphoserine aminotransferase                                                                       | 57  |              | COG1932 | H E   |                     | Yes | No  |
| Soluble                                   | 2005611008 | pfam00266                                         | Phosphoserine aminotransferase                                                                       | 154 |              | COG1932 | E H   | TIGR01364           | Yes | No  |
| Soluble                                   | 2005630221 | pfam00266                                         | Phosphoserine aminotransferase                                                                       | 220 |              | COG1932 | H E   | TIGR01364           | No  | No  |
| Supernatant / Soluble                     | 2005629938 | pfam00266                                         | Phosphoserine aminotransferase                                                                       | 256 | EC:2.6.1.52  | COG1932 | H E   | TIGR01364           | No  | No  |
| Soluble                                   | 2005609577 |                                                   | Phosphoserine phosphatase                                                                            | 123 |              | COG0560 | E     | TIGR02137           | No  | No  |
| Pellet                                    | 2005564215 | pfam01515                                         | Phosphotransacetylase                                                                                | 107 |              | COG0280 | C     |                     | No  | No  |
| Pellet                                    | 2005624339 | pfam01515                                         | Phosphotransacetylase                                                                                | 177 |              | COG0280 | C     | TIGR00651           | No  | No  |
| Soluble / Global                          | 2005564217 | pfam01515                                         | Phosphotransacetylase                                                                                | 317 | EC:2.3.1.8   | COG0280 | C     | TIGR00651           | No  | No  |
| Supernatant / Global                      | 2005566988 | pfam01515                                         | Phosphotransacetylase                                                                                | 176 |              | COG0280 | C     | TIGR00651           | No  | No  |
| Supernatant                               | 2005566811 | pfam01636                                         | Phosphotransferase enzyme family protein, putativ e                                                  | 169 |              |         |       |                     | No  | No  |
| Global                                    | 2005593031 | pfam00359                                         | Phosphotransferase system manitol/fructose-speci fic IIA domain (Ntr-type)                           | 133 | EC:2.7.1.69  | COG1762 | T G   |                     | Yes | No  |
| Pellet / Soluble                          | 2005582013 | pfam00359                                         | Phosphotransferase system manitol/fructose-speci fic IIA domain (Ntr-type)                           | 148 | EC:2.7.1.69  | COG1762 | G T   |                     | No  | No  |
| Pellet / Supernatant / Soluble / Global   | 2005567432 | pfam00359                                         | Phosphotransferase system manitol/fructose-speci fic IIA domain (Ntr-type)                           | 104 |              | COG1762 | T G   |                     | No  | No  |
| Global                                    | 2005560479 | pfam00013 pfam00575 pfam01138 pfam03725 pfam03726 | Polyribonucleotide nucleotidyltransferase (polynu cleotide phosphorylase)                            | 587 | EC:2.7.7.8   | COG1185 | J     |                     | No  | No  |
| Insoluble                                 | 2005595534 | pfam00013 pfam01138 pfam03725 pfam03726           | Polyribonucleotide nucleotidyltransferase (polynu cleotide phosphorylase)                            | 378 |              | COG1185 | J     |                     | No  | No  |
| Insoluble                                 | 2005608541 | pfam01138 pfam03726                               | Polyribonucleotide nucleotidyltransferase (polynu cleotide phosphorylase)                            | 282 |              | COG1185 | J     |                     | No  | No  |
| Pellet                                    | 2005622813 | pfam00013 pfam00575                               | Polyribonucleotide nucleotidyltransferase (polynu cleotide phosphorylase)                            | 183 |              | COG1185 | J     |                     | No  | No  |
| Pellet / Supernatant                      | 2005596232 | pfam00013 pfam00575 pfam03725                     | Polyribonucleotide nucleotidyltransferase (polynu cleotide phosphorylase)                            | 217 |              | COG1185 | J     |                     | No  | No  |
| Soluble                                   | 2005564352 | pfam00013 pfam00575 pfam01138 pfam03725 pfam03726 | Polyribonucleotide nucleotidyltransferase (polynu cleotide phosphorylase)                            | 605 | EC:2.7.7.8   | COG1185 | J     |                     | No  | No  |
| Soluble                                   | 2005594157 | pfam00013 pfam01138 pfam03725 pfam03726           | Polyribonucleotide nucleotidyltransferase (polynu cleotide phosphorylase)                            | 618 | EC:2.7.7.8   | COG1185 | J     |                     | No  | No  |
| Supernatant                               | 2005560475 | pfam00575                                         | Polyribonucleotide nucleotidyltransferase (polynu cleotide phosphorylase)                            | 105 |              | COG1185 | J     |                     | No  | No  |
| Supernatant                               | 2005564353 | pfam00013 pfam01138 pfam03725 pfam03726           | Polyribonucleotide nucleotidyltransferase (polynu cleotide phosphorylase)                            | 586 | EC:2.7.7.8   | COG1185 | J     |                     | No  | No  |
| Supernatant                               | 2005575101 | pfam00013 pfam01138 pfam03725 pfam03726           | Polyribonucleotide nucleotidyltransferase (polynu cleotide phosphorylase)                            | 375 |              | COG1185 | J     |                     | No  | No  |
| Supernatant / Global                      | 2005560507 | pfam01138 pfam03725 pfam03726                     | Polyribonucleotide nucleotidyltransferase (polynu cleotide phosphorylase)                            | 443 |              | COG1185 | J     |                     | No  | No  |
| Supernatant / Global                      | 2005567867 | pfam00013 pfam00575 pfam01138 pfam03725 pfam03726 | Polyribonucleotide nucleotidyltransferase (polynu cleotide phosphorylase)                            | 647 | EC:2.7.7.8   | COG1185 | J     |                     | No  | No  |
| Supernatant                               | 2005573809 |                                                   | Possible glycosyl hydrolase precursor                                                                | 393 |              | COG3693 | G     |                     | No  | No  |
| Pellet                                    | 2005560635 | pfam03422 pfam04616                               | Possible xylan degradation enzyme (Glycosyl hydro lase family 43-like domain, cellulose-bindi [...]) | 505 |              | COG3507 | G     |                     | No  | No  |
| Pellet                                    | 2005621794 | pfam00590                                         | Precorin-4 methylase                                                                                 | 197 | EC:2.1.1.133 | COG2875 | H     | TIGR01465           | Yes | No  |
| Pellet                                    | 2005564944 | pfam00583                                         | Predicted acetyltransferase                                                                          | 292 |              | COG3393 | R     |                     | No  | No  |
| Soluble                                   | 2005619390 | pfam02515                                         | Predicted acyl-CoA transferases/carnitine dehydra tase                                               | 289 |              | COG1804 | C     |                     | No  | No  |
| Pellet                                    | 2005626337 | pfam00291                                         | Predicted alternative tryptophan synthase beta-su bunit (paralog of TrpB)                            | 247 |              | COG1350 | R     | TIGR01415           | No  | No  |
| Supernatant / Global                      | 2005613242 | pfam00291                                         | Predicted alternative tryptophan synthase beta-su bunit (paralog of TrpB)                            | 136 |              | COG1350 | R     |                     | No  | No  |
| Supernatant / Soluble                     | 2005625712 | pfam00291                                         | Predicted alternative tryptophan synthase beta-su bunit (paralog of TrpB)                            | 254 |              | COG1350 | R     | TIGR01415           | Yes | Yes |
| Pellet                                    | 2005613843 |                                                   | Predicted amidophosphoribosyltransferases                                                            | 184 |              | COG1040 | R     |                     | No  | No  |



|                                |            |                     |                                                                                                                                       |     |             |         |   |                     |     |     |
|--------------------------------|------------|---------------------|---------------------------------------------------------------------------------------------------------------------------------------|-----|-------------|---------|---|---------------------|-----|-----|
| Supernatant                    | 2005620456 | pfam10023           | Predicted aminopeptidase                                                                                                              | 296 |             | COG4324 | R |                     | No  | No  |
| Pellet                         | 2005563097 | pfam05872           | Predicted ATPase                                                                                                                      | 128 |             | COG0433 | R |                     | No  | No  |
| Pellet                         | 2005587849 | pfam05872           | Predicted ATPase                                                                                                                      | 423 |             | COG0433 | R |                     | No  | No  |
| Pellet / Insoluble             | 2005623439 | pfam08706           | Predicted ATPase                                                                                                                      | 198 |             | COG3378 | R |                     | No  | No  |
| Soluble                        | 2005599336 |                     | Predicted ATPase (AAA+ superfamily)                                                                                                   | 259 |             | COG1373 | R |                     | No  | No  |
| Supernatant                    | 2005588148 |                     | Predicted ATPase (AAA+ superfamily)                                                                                                   | 182 |             | COG1373 | R |                     | Yes | No  |
| Global                         | 2005568377 | pfam01171           | Predicted ATPase of the PP-loop superfamily implicated in cell cycle control                                                          | 222 |             | COG0037 | D | TIGR02432           | No  | No  |
| Pellet                         | 2005570297 | pfam04685           | Predicted bile acid beta-glucosidase                                                                                                  | 449 |             | COG4354 | G |                     | No  | No  |
| Pellet                         | 2005606359 | pfam02310           | Predicted cobalamin binding protein                                                                                                   | 118 |             | COG5012 | R |                     | No  | No  |
| Pellet / Soluble / Supernatant | 2005586302 | pfam02310 pfam02607 | Predicted cobalamin binding protein                                                                                                   | 163 | EC:2.1.1.13 | COG5012 | R |                     | No  | No  |
| Soluble                        | 2005587288 | pfam02310 pfam02607 | Predicted cobalamin binding protein                                                                                                   | 210 | EC:2.1.1.13 | COG5012 | R |                     | No  | No  |
| Soluble                        | 2005589521 | pfam02310 pfam02607 | Predicted cobalamin binding protein                                                                                                   | 214 | EC:2.1.1.13 | COG5012 | R | TIGR02370           | No  | No  |
| Supernatant                    | 2005565848 | pfam02310 pfam02607 | Predicted cobalamin binding protein                                                                                                   | 210 | EC:2.1.1.13 | COG5012 | R | TIGR02370           | No  | No  |
| Supernatant                    | 2005576233 | pfam02310 pfam02607 | Predicted cobalamin binding protein                                                                                                   | 210 | EC:2.1.1.13 | COG5012 | R |                     | No  | No  |
| Supernatant                    | 2005632845 | pfam02310 pfam02607 | Predicted cobalamin binding protein                                                                                                   | 197 | EC:2.1.1.13 | COG5012 | R | TIGR02370           | No  | No  |
| Soluble / Supernatant          | 2005569028 | pfam04952           | Predicted deacylase                                                                                                                   | 316 |             | COG3608 | R |                     | No  | No  |
| Global / Supernatant           | 2005602293 | pfam01408           | Predicted dehydrogenases and related proteins                                                                                         | 159 |             | COG0673 | R |                     | Yes | No  |
| Pellet                         | 2005563670 | pfam02894           | Predicted dehydrogenases and related proteins                                                                                         | 248 |             | COG0673 | R |                     | No  | No  |
| Soluble                        | 2005575308 | pfam01408 pfam02894 | Predicted dehydrogenases and related proteins                                                                                         | 362 | EC:1.1.1.-  | COG0673 | R |                     | No  | No  |
| Supernatant / Soluble          | 2005566583 | pfam01408 pfam02894 | Predicted dehydrogenases and related proteins                                                                                         | 279 |             | COG0673 | R |                     | No  | No  |
| Global                         | 2005567183 |                     | Predicted DNA-binding protein with the Helix-hair pin-helix motif                                                                     | 295 |             | COG4277 | R |                     | No  | No  |
| Pellet                         | 2005567369 | pfam02021           | Predicted endonuclease distantly related to archaeal Holliday junction resolvase                                                      | 119 |             | COG0792 | L | TIGR00252           | No  | No  |
| Pellet                         | 2005629290 | pfam01734           | Predicted esterase of the alpha-beta hydrolase superfamily                                                                            | 146 |             | COG4667 | R |                     | No  | No  |
| Pellet                         | 2005560887 |                     | Predicted exporters of the RND superfamily                                                                                            | 236 |             |         |   |                     | No  | No  |
| Supernatant                    | 2005608841 | pfam04055           | Predicted Fe-S oxidoreductase                                                                                                         | 191 |             | COG1242 | R | TIGR01212           | No  | No  |
| Pellet / Supernatant           | 2005594882 | pfam04041           | Predicted glycosylase                                                                                                                 | 330 |             | COG2152 | G |                     | No  | No  |
| Soluble                        | 2005562061 | pfam04041           | Predicted glycosylase                                                                                                                 | 329 |             | COG2152 | G | TIGR03304           | No  | No  |
| Soluble                        | 2005562042 | pfam00535           | Predicted glycosyltransferases                                                                                                        | 305 | EC:2.4.1.-  | COG1216 | R |                     | No  | No  |
| Pellet                         | 2005579572 | pfam01926           | Predicted GTPase, probable translation factor                                                                                         | 269 |             | COG0012 | J | TIGR00092 TIGR00650 | Yes | No  |
| Pellet                         | 2005564535 | pfam01926           | Predicted GTPases                                                                                                                     | 276 |             | COG1160 | R | TIGR00231 TIGR00650 | No  | No  |
| Pellet                         | 2005625035 |                     | Predicted GTPases (dynamain-related)                                                                                                  | 253 |             | COG1160 | R |                     | No  | No  |
| Pellet                         | 2005564841 | pfam00013 pfam01966 | Predicted HD superfamily hydrolase                                                                                                    | 455 |             | COG1418 | R | TIGR03319 TIGR00277 | No  | No  |
| Pellet                         | 2005592930 | pfam00013 pfam01966 | Predicted HD superfamily hydrolase                                                                                                    | 411 |             | COG1418 | R | TIGR00277 TIGR03319 | No  | No  |
| Pellet / Supernatant           | 2005563486 | pfam00013 pfam01966 | Predicted HD superfamily hydrolase                                                                                                    | 373 |             | COG1418 | R | TIGR00277 TIGR03319 | No  | No  |
| Supernatant                    | 2005564840 | pfam00013 pfam01966 | Predicted HD superfamily hydrolase                                                                                                    | 509 |             | COG1418 | R | TIGR00277 TIGR03319 | Yes | Yes |
| Supernatant                    | 2005567119 | pfam00013 pfam01966 | Predicted HD superfamily hydrolase                                                                                                    | 410 |             | COG1418 | R | TIGR00277 TIGR03319 | No  | No  |
| Pellet                         | 2005598398 |                     | Predicted helicases                                                                                                                   | 257 |             | COG1203 | R |                     | No  | No  |
| Pellet                         | 2005629474 |                     | Predicted hydrolase of the metallo-beta-lactamase superfamily                                                                         | 84  |             | COG0595 | R |                     | No  | No  |
| Pellet                         | 2005610012 | pfam08282           | Predicted hydrolases of the HAD superfamily                                                                                           | 97  |             | COG0561 | R |                     | No  | No  |
| Soluble                        | 2005616254 | pfam08282           | Predicted hydrolases of the HAD superfamily                                                                                           | 164 |             | COG0561 | R |                     | No  | No  |
| Global                         | 2005581798 | pfam04509           | Predicted inhibitor of MCP methylation, homolog of CheC                                                                               | 128 |             | COG1406 | N |                     | Yes | No  |
| Soluble / Supernatant          | 2005599434 |                     | Predicted inhibitor of MCP methylation, homolog of CheC                                                                               | 72  |             | COG1406 | N |                     | No  | No  |
| Supernatant                    | 2005581954 | pfam04509           | Predicted inhibitor of MCP methylation, homolog of CheC                                                                               | 158 |             | COG1406 | N |                     | No  | No  |
| Supernatant                    | 2005604482 | pfam04509           | Predicted inhibitor of MCP methylation, homolog of CheC                                                                               | 131 |             | COG1406 | N |                     | Yes | No  |
| Supernatant / Soluble          | 2005630157 |                     | Predicted inhibitor of MCP methylation, homolog of CheC                                                                               | 58  |             | COG1406 | N |                     | No  | No  |
| Pellet                         | 2005582478 | pfam00679           | Predicted membrane GTPase involved in stress response                                                                                 | 291 |             | COG1217 | T | TIGR01394           | No  | No  |
| Soluble                        | 2005579520 |                     | Predicted membrane protein                                                                                                            | 185 |             | COG2364 | S |                     | No  | Yes |
| Pellet                         | 2005568328 | pfam01966 pfam07698 | Predicted membrane-associated HD superfamily hydrolase                                                                                | 442 |             | COG1480 | R | TIGR00277           | Yes | Yes |
| Pellet                         | 2005572481 | pfam02163           | Predicted membrane-associated Zn-dependent proteases 1                                                                                | 417 | EC:3.4.24.- | COG0750 | M | TIGR00054           | No  | Yes |
| Soluble                        | 2005560667 | pfam02130           | Predicted metal-dependent hydrolase                                                                                                   | 154 |             | COG0319 | R | TIGR00043           | No  | No  |
| Pellet                         | 2005588552 | pfam01170           | Predicted N6-adenine-specific DNA methylase                                                                                           | 293 |             | COG0116 | L |                     | No  | No  |
| Global                         | 2005580172 | pfam04205           | Predicted NADH                                                                                                                        | 211 |             | COG4659 | C | TIGR01947           | Yes | Yes |
| Pellet                         | 2005579210 | pfam01512           | Predicted NADH                                                                                                                        | 256 |             | COG4656 | C | TIGR01945           | No  | No  |
| Pellet                         | 2005580174 | pfam01512           | Predicted NADH                                                                                                                        | 284 |             | COG4656 | C | TIGR01945           | No  | No  |
| Pellet                         | 2005621509 |                     | Predicted NADH                                                                                                                        | 173 |             | COG4658 | C |                     | No  | Yes |
| Soluble                        | 2005632290 | pfam05738           | Predicted outer membrane protein                                                                                                      | 254 |             | COG4932 | M |                     | No  | No  |
| Pellet                         | 2005602058 | pfam03547           | Predicted permeases                                                                                                                   | 239 |             | COG0679 | R |                     | Yes | Yes |
| Soluble                        | 2005591226 | pfam01884           | Predicted phosphate-binding enzymes, TIM-barrel fold                                                                                  | 249 |             | COG1646 | R | TIGR01768 TIGR01769 | No  | No  |
| Pellet                         | 2005589100 |                     | Predicted phosphohydrolases                                                                                                           | 304 |             |         |   |                     | No  | No  |
| Pellet / Supernatant           | 2005576291 |                     | Predicted phosphohydrolases                                                                                                           | 712 |             |         |   |                     | No  | No  |
| Soluble                        | 2005626939 |                     | Predicted phosphotransferases                                                                                                         | 203 |             | COG2236 | R |                     | No  | No  |
| Supernatant                    | 2005630841 | pfam03961           | Predicted polymerase, most proteins contain PALM domain, HD hydrolase domain and Zn-ribbon domain                                     | 213 |             | COG1315 | L |                     | No  | No  |
| Soluble                        | 2005624307 |                     | Predicted protein                                                                                                                     | 221 |             |         |   |                     | No  | No  |
| Pellet                         | 2005564900 | pfam01041           | Predicted pyridoxal phosphate-dependent enzyme apparently involved in regulation of cell wall biogenesis                              | 362 |             | COG0399 | M |                     | No  | No  |
| Pellet                         | 2005563719 |                     | Predicted RNA-binding protein                                                                                                         | 196 |             | COG1847 | R |                     | No  | No  |
| Pellet                         | 2005584242 | pfam01424           | Predicted RNA-binding protein                                                                                                         | 252 |             | COG1847 | R |                     | No  | No  |
| Supernatant                    | 2005584834 |                     | Predicted RNA-binding protein (contains KH domain)                                                                                    | 77  |             | COG1837 | R |                     | No  | No  |
| Supernatant                    | 2005615378 | pfam05670 pfam05833 | Predicted RNA-binding protein homologous to eukaryotic snRNP                                                                          | 280 |             | COG1293 | K |                     | No  | No  |
| Global                         | 2005572284 |                     | Predicted SAM-dependent methyltransferases                                                                                            | 248 |             | COG1092 | R |                     | No  | No  |
| Pellet                         | 2005609096 |                     | Predicted SAM-dependent methyltransferases                                                                                            | 262 |             | COG1092 | R |                     | No  | No  |
| Soluble                        | 2005622025 | pfam00672 pfam06580 | Predicted signal transduction protein with a C-terminal ATPase domain                                                                 | 201 |             | COG3275 | T |                     | Yes | No  |
| Insoluble                      | 2005607348 | pfam00239 pfam00376 | Predicted site-specific integrase-resolvase                                                                                           | 201 |             | COG2452 | L |                     | No  | No  |
| Global                         | 2005590146 | pfam00496           | Predicted solute binding protein                                                                                                      | 480 |             | COG3889 | R |                     | No  | No  |
| Pellet                         | 2005594651 | pfam00496           | Predicted solute binding protein                                                                                                      | 258 |             | COG3889 | R |                     | No  | No  |
| Pellet                         | 2005629983 |                     | Predicted solute binding protein                                                                                                      | 156 |             | COG3889 | R |                     | No  | No  |
| Soluble                        | 2005583908 | pfam01513           | Predicted sugar kinase                                                                                                                | 237 | EC:2.7.1.23 | COG0061 | G |                     | No  | No  |
| Pellet                         | 2005570289 |                     | Predicted transcriptional regulator                                                                                                   | 320 |             | COG2378 | K |                     | No  | No  |
| Global                         | 2005594778 |                     | Predicted transcriptional regulator containing an HTH domain and an uncharacterized domain shared with the mammalian protein Schlafen | 149 |             | COG2865 | K |                     | No  | No  |
| Pellet                         | 2005562868 | pfam02195           | Predicted transcriptional regulators                                                                                                  | 313 | EC:2.7.7.-  | COG1475 | K | TIGR00180           | No  | No  |
| Pellet / Soluble               | 2005612839 | pfam01381 pfam07883 | Predicted transcriptional regulators                                                                                                  | 184 |             |         |   |                     | No  | No  |
| Soluble                        | 2005560151 | pfam01381 pfam07883 | Predicted transcriptional regulators                                                                                                  | 190 |             |         |   |                     | No  | No  |
| Soluble                        | 2005568219 | pfam01381 pfam07883 | Predicted transcriptional regulators                                                                                                  | 184 |             | COG1917 | S |                     | No  | No  |
| Soluble                        | 2005616836 | pfam01381 pfam07883 | Predicted transcriptional regulators                                                                                                  | 184 |             | COG1917 | S |                     | No  | No  |
| Soluble / Supernatant          | 2005599727 | pfam01381 pfam07883 | Predicted transcriptional regulators                                                                                                  | 194 |             |         |   |                     | No  | No  |
| Supernatant                    | 2005616831 | pfam00376           | Predicted transcriptional regulators                                                                                                  | 193 |             | COG0789 | K |                     | No  | No  |
| Supernatant                    | 2005569736 |                     | Predicted tRNA(5-methylaminomethyl-2-thiouridylate) methyltransferase, contains the PP-loop ATPase domain                             | 361 |             | COG0482 | J |                     | No  | No  |
| Global                         | 2005577674 | pfam05193           | Predicted Zn-dependent peptidases                                                                                                     | 586 |             | COG0612 | R |                     | No  | No  |

|                                  |            |                                                   |                                                              |      |              |         |     |                     |     |     |
|----------------------------------|------------|---------------------------------------------------|--------------------------------------------------------------|------|--------------|---------|-----|---------------------|-----|-----|
| Global                           | 2005589855 | pfam05193                                         | Predicted Zn-dependent peptidases                            | 561  |              | COG0612 | R   |                     | No  | No  |
| Insoluble / Pellet / Supernatant | 2005571814 | pfam05193                                         | Predicted Zn-dependent peptidases                            | 305  |              | COG0612 | R   |                     | No  | No  |
| Pellet                           | 2005631147 | pfam05193                                         | Predicted Zn-dependent peptidases                            | 253  |              | COG0612 | R   |                     | No  | No  |
| Supernatant                      | 2005568440 | pfam05193                                         | Predicted Zn-dependent peptidases                            | 561  |              | COG0612 | R   |                     | No  | No  |
| Pellet                           | 2005589704 | pfam05193 pfam08367                               | Predicted Zn-dependent peptidases, insulinase-like           | 986  |              | COG1026 | R   |                     | No  | No  |
| Soluble                          | 2005581002 | pfam05193                                         | Predicted Zn-dependent peptidases, insulinase-like           | 266  |              | COG1026 | R   |                     | No  | No  |
| Supernatant                      | 2005572348 | pfam08367                                         | Predicted Zn-dependent peptidases, insulinase-like           | 392  |              | COG1026 | R   |                     | No  | No  |
| Soluble                          | 2005581411 | pfam01523                                         | Predicted Zn-dependent proteases and their inactive homologs | 417  |              | COG0312 | R   |                     | No  | No  |
| Pellet                           | 2005572476 | pfam00800 pfam01817 pfam01842                     | Prephenate dehydratase                                       | 381  | EC:4.2.1.51  | COG0077 | E   |                     | No  | No  |
| Pellet                           | 2005560165 | pfam07516                                         | Preprotein translocase subunit SecA (ATPase, RNA helicase)   | 359  |              | COG0653 | U   |                     | No  | No  |
| Pellet                           | 2005568362 | pfam07516 pfam07517                               | Preprotein translocase subunit SecA (ATPase, RNA helicase)   | 803  |              | COG0653 | U   |                     | No  | No  |
| Pellet                           | 2005574475 | pfam00271 pfam01043 pfam07516 pfam07517           | Preprotein translocase subunit SecA (ATPase, RNA helicase)   | 452  |              | COG0653 | U   |                     | No  | No  |
| Supernatant                      | 2005590437 | pfam02810 pfam07516 pfam07517                     | Preprotein translocase subunit SecA (ATPase, RNA helicase)   | 741  | EC:3.6.3.-   | COG0653 | U   | TIGR00963           | No  | No  |
| Pellet                           | 2005617668 |                                                   | Preprotein translocase subunit SecD                          | 259  |              | COG0342 | U   |                     | No  | No  |
| Pellet                           | 2005626883 |                                                   | Preprotein translocase subunit SecD                          | 130  |              | COG0342 | U   |                     | No  | No  |
| Pellet / Supernatant / Insoluble | 2005624483 | pfam07549                                         | Preprotein translocase subunit SecD                          | 212  |              | COG0342 | U   |                     | Yes | No  |
| Supernatant                      | 200562736  |                                                   | Preprotein translocase subunit SecD                          | 302  |              | COG0342 | U   | TIGR01129           | No  | Yes |
| Pellet                           | 2005582223 | pfam00587 pfam04073                               | Prolyl-tRNA synthetase                                       | 410  |              | COG0442 | J   | TIGR00409           | No  | No  |
| Pellet / Soluble                 | 2005586677 | pfam00587                                         | Prolyl-tRNA synthetase                                       | 315  |              | COG0442 | J   | TIGR00409           | No  | No  |
| Soluble                          | 2005560836 | pfam00587                                         | Prolyl-tRNA synthetase                                       | 338  |              | COG0442 | J   | TIGR00408           | No  | No  |
| Global / Pellet / Supernatant    | 2005577150 | pfam00574                                         | Protease subunit of ATP-dependent Clp proteases              | 181  | EC:3.4.21.92 | COG0740 | U O | TIGR00493           | No  | No  |
| Pellet                           | 2005619461 | pfam00574                                         | Protease subunit of ATP-dependent Clp proteases              | 108  |              | COG0740 | U O | TIGR00493           | Yes | No  |
| Pellet                           | 2005629364 | pfam00574                                         | Protease subunit of ATP-dependent Clp proteases              | 197  | EC:3.4.21.92 | COG0740 | O U | TIGR00493           | No  | No  |
| Pellet / Supernatant             | 2005580865 | pfam00574                                         | Protease subunit of ATP-dependent Clp proteases              | 200  | EC:3.4.21.92 | COG0740 | O U | TIGR00493           | No  | No  |
| Soluble                          | 2005566601 | pfam00574                                         | Protease subunit of ATP-dependent Clp proteases              | 105  |              | COG0740 | O U |                     | Yes | No  |
| Soluble                          | 2005581230 | pfam00574                                         | Protease subunit of ATP-dependent Clp proteases              | 64   |              | COG0740 | U O |                     | No  | No  |
| Supernatant                      | 2005567303 | pfam00574                                         | Protease subunit of ATP-dependent Clp proteases              | 194  | EC:3.4.21.92 | COG0740 | U O | TIGR00493           | No  | No  |
| Supernatant                      | 2005590428 | pfam00574                                         | Protease subunit of ATP-dependent Clp proteases              | 202  | EC:3.4.21.92 | COG0740 | U O | TIGR00493           | No  | No  |
| Supernatant                      | 2005616902 | pfam00472                                         | Protein chain release factor B                               | 140  |              | COG1186 | J   |                     | No  | No  |
| Pellet / Supernatant             | 2005580588 | pfam01323                                         | Protein-disulfide isomerase                                  | 234  |              | COG1651 | O   |                     | Yes | No  |
| Global                           | 2005585944 | pfam00849                                         | Pseudouridylate synthases, 23S RNA-specific                  | 153  |              | COG0564 | J   |                     | No  | No  |
| Pellet                           | 2005567022 | pfam00849 pfam01479                               | Pseudouridylate synthases, 23S RNA-specific                  | 221  |              | COG0564 | J   | TIGR00005           | No  | No  |
| Pellet                           | 2005629354 | pfam01048                                         | Purine nucleoside phosphorylase                              | 135  |              | COG0005 | F   |                     | No  | No  |
| Soluble                          | 2005564647 | pfam01048                                         | Purine nucleoside phosphorylase                              | 235  | EC:2.4.2.1   | COG0005 | F   | TIGR01697 TIGR01700 | No  | No  |
| Supernatant                      | 2005568127 | pfam01048                                         | Purine nucleoside phosphorylase                              | 273  | EC:2.4.2.1   | COG0005 | F   | TIGR01697 TIGR01700 | No  | No  |
| Soluble                          | 2005612110 | pfam01048                                         | Purine-nucleoside phosphorylase                              | 234  | EC:2.4.2.1   | COG0813 | F   | TIGR00107           | No  | No  |
| Pellet                           | 2005606530 | pfam02945                                         | Putative                                                     | 186  |              |         |     |                     | No  | No  |
| Soluble                          | 2005562331 |                                                   | Putative 5(3')-deoxyribonucleotidase (EC 3.1.3.-)            | 203  |              | COG4502 | S   |                     | No  | No  |
| Global                           | 2005627300 |                                                   | Putative chemotaxis protein CheX                             | 146  |              | COG1406 | N   |                     | No  | No  |
| Pellet                           | 2005572016 |                                                   | Putative membrane protein                                    | 245  |              |         |     |                     | No  | No  |
| Pellet                           | 2005632353 |                                                   | Putative oxalate                                             | 181  |              |         |     |                     | No  | Yes |
| Soluble                          | 2005619012 | pfam01408                                         | Putative oxidoreductase                                      | 96   |              | COG0673 | R   |                     | No  | No  |
| Insoluble                        | 2005573140 | pfam00672 pfam02518 pfam06580                     | Putative regulator of cell autolysis                         | 468  |              | COG3275 | T   |                     | No  | Yes |
| Soluble                          | 2005567941 |                                                   | Putative sugar binding secreted protein                      | 260  |              |         |     |                     | Yes | No  |
| Soluble                          | 2005580446 | pfam01435                                         | Putative Zn-dependent protease, contains TPR repeats         | 161  |              | COG4783 | R   |                     | No  | No  |
| Supernatant                      | 2005576486 | pfam01435                                         | Putative Zn-dependent protease, contains TPR repeats         | 284  |              | COG4783 | R   |                     | No  | No  |
| Global                           | 2005567823 | pfam00037 pfam01558 pfam01855 pfam02775 pfam10371 | Pyruvate                                                     | 1043 | EC:1.2.7.-   | COG1013 | C   | TIGR02176           | No  | No  |
| Global                           | 2005568307 | pfam02775                                         | Pyruvate                                                     | 474  |              | COG1013 | C   | TIGR02176           | No  | No  |
| Global                           | 2005603477 | pfam01855                                         | Pyruvate                                                     | 163  |              | COG0674 | C   |                     | No  | No  |
| Global / Pellet / Supernatant    | 2005569171 | pfam00037 pfam01558 pfam02775 pfam10371           | Pyruvate                                                     | 610  |              | COG1013 | C   | TIGR02176           | No  | No  |
| Global / Pellet / Supernatant    | 2005573088 | pfam00037 pfam02775 pfam10371                     | Pyruvate                                                     | 586  |              | COG1013 | C   | TIGR02176           | No  | No  |
| Global / Pellet / Supernatant    | 2005581296 | pfam00037 pfam01558 pfam01855 pfam10371           | Pyruvate                                                     | 576  |              | COG0674 | C   | TIGR02176           | No  | No  |
| Global / Soluble                 | 2005569174 | pfam02775                                         | Pyruvate                                                     | 328  |              | COG1013 | C   |                     | No  | No  |
| Global / Soluble                 | 2005592666 | pfam01855                                         | Pyruvate                                                     | 246  |              | COG0674 | C   |                     | No  | No  |
| Global / Supernatant             | 2005571808 | pfam01855                                         | Pyruvate                                                     | 296  |              | COG0674 | C   |                     | Yes | No  |
| Insoluble                        | 2005561029 | pfam00037 pfam02775 pfam10371                     | Pyruvate                                                     | 551  |              | COG1013 | C   | TIGR02176           | No  | No  |
| Insoluble                        | 2005561030 | pfam00037 pfam01558 pfam01855 pfam10371           | Pyruvate                                                     | 814  |              | COG0674 | C   | TIGR02176           | No  | No  |
| Insoluble                        | 2005562807 | pfam02775                                         | Pyruvate                                                     | 476  |              | COG1013 | C   | TIGR02176           | No  | No  |
| Insoluble                        | 2005570505 | pfam00037 pfam01558 pfam01855 pfam10371           | Pyruvate                                                     | 931  |              | COG0674 | C   | TIGR02176           | No  | No  |
| Insoluble                        | 2005571809 | pfam00037 pfam01558 pfam02775 pfam10371           | Pyruvate                                                     | 578  |              | COG1013 | C   | TIGR02176           | No  | No  |
| Insoluble                        | 2005583573 | pfam00037 pfam01558 pfam01855 pfam02775 pfam10371 | Pyruvate                                                     | 1081 | EC:1.2.7.-   | COG0674 | C   | TIGR02176           | Yes | No  |
| Pellet                           | 2005566912 | pfam01558                                         | Pyruvate                                                     | 194  | EC:1.2.7.8   | COG1014 | C   | TIGR03334           | No  | No  |
| Pellet                           | 2005586233 | pfam01855 pfam02780                               | Pyruvate                                                     | 366  | EC:1.2.7.7   | COG0674 | C   |                     | No  | No  |
| Pellet                           | 2005589653 | pfam00037 pfam02775 pfam10371                     | Pyruvate                                                     | 486  |              | COG1013 | C   | TIGR02176           | No  | No  |
| Pellet                           | 2005591162 | pfam02775                                         | Pyruvate                                                     | 192  |              | COG1013 | C   |                     | No  | No  |
| Pellet                           | 2005594339 | pfam01558 pfam10371                               | Pyruvate                                                     | 256  |              | COG1014 | C   |                     | No  | No  |
| Pellet                           | 2005616832 |                                                   | Pyruvate                                                     | 230  |              | COG1013 | C   |                     | No  | No  |
| Pellet                           | 2005620469 | pfam02775                                         | Pyruvate                                                     | 279  |              | COG1013 | C   |                     | No  | No  |
| Pellet                           | 2005626205 |                                                   | Pyruvate                                                     | 139  |              | COG1013 | C   |                     | No  | No  |
| Pellet                           | 2005631190 |                                                   | Pyruvate                                                     | 162  |              | COG0674 | C   |                     | Yes | No  |
| Pellet / Soluble                 | 2005594982 | pfam02775                                         | Pyruvate                                                     | 421  |              | COG1013 | C   |                     | No  | No  |
| Pellet / Soluble                 | 2005614035 | pfam01855                                         | Pyruvate                                                     | 266  |              | COG0674 | C   |                     | No  | No  |
| Pellet / Soluble / Supernatant   | 2005587077 | pfam02775                                         | Pyruvate                                                     | 288  |              | COG1013 | C   |                     | No  | No  |
| Pellet / Supernatant             | 2005577766 | pfam00037 pfam02775 pfam10371                     | Pyruvate                                                     | 523  |              | COG1013 | C   | TIGR02176           | No  | No  |
| Pellet / Supernatant             | 2005614036 |                                                   | Pyruvate                                                     | 262  |              | COG1013 | C   |                     | No  | No  |
| Pellet / Supernatant / Global    | 2005560508 | pfam01855                                         | Pyruvate                                                     | 295  |              | COG0674 | C   |                     | No  | No  |
| Soluble                          | 2005564790 | pfam01558 pfam10371                               | Pyruvate                                                     | 390  |              | COG1014 | C   |                     | Yes | No  |
| Soluble                          | 2005567466 | pfam01558                                         | Pyruvate                                                     | 172  | EC:1.2.7.3   | COG1014 | C   |                     | Yes | No  |
| Soluble                          | 2005567822 | pfam02775                                         | Pyruvate                                                     | 277  |              | COG1013 | C   |                     | No  | No  |
| Soluble                          | 2005589291 | pfam00037 pfam01558 pfam10371                     | Pyruvate                                                     | 422  |              | COG1014 | C   |                     | No  | No  |
| Soluble                          | 2005601979 |                                                   | Pyruvate                                                     | 209  |              | COG1013 | C   |                     | No  | No  |
| Soluble                          | 2005610633 | pfam02775                                         | Pyruvate                                                     | 218  | EC:1.2.7.3   | COG1013 | C   |                     | No  | No  |
| Soluble                          | 2005625915 | pfam01558 pfam01855                               | Pyruvate                                                     | 287  |              | COG0674 | C   |                     | No  | No  |
| Soluble / Global                 | 2005560510 | pfam00037 pfam01558 pfam02775 pfam10371           | Pyruvate                                                     | 683  |              | COG1013 | C   | TIGR02176 TIGR01435 | Yes | No  |
| Supernatant                      | 2005579936 | pfam00037 pfam01558 pfam02775 pfam10371           | Pyruvate                                                     | 915  | EC:1.2.7.-   | COG1013 | C   | TIGR02176           | No  | No  |
| Supernatant                      | 2005623456 |                                                   | Pyruvate                                                     | 221  |              | COG1013 | C   |                     | No  | No  |
| Supernatant / Soluble            | 2005617012 | pfam01855                                         | Pyruvate                                                     | 278  |              | COG0674 | C   |                     | No  | No  |

|                                          |            |                                         |                                                                                                                      |     |                       |         |     |           |     |     |
|------------------------------------------|------------|-----------------------------------------|----------------------------------------------------------------------------------------------------------------------|-----|-----------------------|---------|-----|-----------|-----|-----|
| Global                                   | 2005632204 | pfam00224                               | Pyruvate kinase                                                                                                      | 275 |                       | COG0469 | G   | TIGR01064 | No  | No  |
| Global / Insoluble / Pellet              | 2005574037 | pfam00224 pfam02887                     | Pyruvate kinase                                                                                                      | 605 | EC:2.7.1.40           | COG0469 | G   | TIGR01064 | No  | No  |
| Pellet                                   | 2005576487 | pfam00224 pfam02887                     | Pyruvate kinase                                                                                                      | 604 | EC:2.7.1.40           | COG0469 | G   | TIGR01064 | No  | No  |
| Pellet                                   | 2005599339 | pfam00224                               | Pyruvate kinase                                                                                                      | 233 |                       | COG0469 | G   |           | Yes | No  |
| Pellet / Soluble / Supernatant           | 2005580654 | pfam00224 pfam02887                     | Pyruvate kinase                                                                                                      | 400 | EC:2.7.1.40           | COG0469 | G   | TIGR01064 | No  | No  |
| Soluble                                  | 2005564332 | pfam02887                               | Pyruvate kinase                                                                                                      | 232 |                       | COG0469 | G   |           | No  | No  |
| Soluble                                  | 2005602548 | pfam00224 pfam02887                     | Pyruvate kinase                                                                                                      | 296 |                       | COG0469 | G   |           | No  | No  |
| Soluble / Supernatant                    | 2005597621 | pfam00224                               | Pyruvate kinase                                                                                                      | 231 |                       | COG0469 | G   |           | No  | No  |
| Soluble / Supernatant                    | 2005610428 | pfam00224 pfam02887                     | Pyruvate kinase                                                                                                      | 281 |                       | COG0469 | G   |           | No  | No  |
| Pellet / Soluble                         | 2005572045 | pfam00676                               | Pyruvate/2-oxoglutarate dehydrogenase complex, de hydrogenase (E1) component, eukaryotic type, alpha subunit         | 374 | EC:1.2.4.1            | COG1071 | C   |           | No  | No  |
| Pellet                                   | 2005572043 | pfam07992                               | Pyruvate/2-oxoglutarate dehydrogenase complex, di hydroliipoamide dehydrogenase (E3) component, and related enz ymes | 255 |                       | COG1249 | C   |           | No  | No  |
| Pellet                                   | 2005572050 | pfam07992                               | Pyruvate/2-oxoglutarate dehydrogenase complex, di hydroliipoamide dehydrogenase (E3) component, and related enz ymes | 193 |                       | COG1249 | C   |           | No  | No  |
| Global                                   | 2005581632 | pfam00682                               | Pyruvate/oxaloacetate carboxyltransferase                                                                            | 404 |                       | COG5016 | C   |           | No  | No  |
| Insoluble                                | 2005561277 |                                         | Pyruvate/oxaloacetate carboxyltransferase                                                                            | 246 |                       | COG5016 | C   |           | No  | No  |
| Pellet / Soluble / Supernatant           | 2005593941 | pfam00364 pfam00682 pfam02436           | Pyruvate/oxaloacetate carboxyltransferase                                                                            | 688 | EC:4.1.1.3            | COG5016 | C   | TIGR01108 | No  | No  |
| Pellet / Supernatant / Insoluble /Global | 2005588205 |                                         | Pyruvate/oxaloacetate carboxyltransferase                                                                            | 51  |                       | COG5016 | C   |           | No  | No  |
| Soluble                                  | 200560896  | pfam00364 pfam00682 pfam02436           | Pyruvate/oxaloacetate carboxyltransferase                                                                            | 378 |                       | COG5016 | C   |           | No  | No  |
| Soluble                                  | 2005573799 | pfam00364 pfam00529 pfam00682 pfam02436 | Pyruvate/oxaloacetate carboxyltransferase                                                                            | 490 |                       | COG5016 | C   |           | Yes | No  |
| Supernatant / Global                     | 2005562101 | pfam00682                               | Pyruvate/oxaloacetate carboxyltransferase                                                                            | 403 |                       | COG5016 | C   |           | No  | No  |
| Supernatant / Global                     | 2005566936 | pfam00364 pfam00682 pfam02436           | Pyruvate/oxaloacetate carboxyltransferase                                                                            | 614 | EC:4.1.1.3            | COG5016 | C   |           | No  | No  |
| Soluble                                  | 2005613932 | pfam02901                               | Pyruvate-formate lyase                                                                                               | 265 |                       | COG1882 | C   |           | Yes | No  |
| Pellet                                   | 2005571192 |                                         | Rad3-related DNA helicases                                                                                           | 319 |                       | COG1199 | K L |           | No  | No  |
| Pellet                                   | 2005561979 | pfam00154                               | RecA/RadA recombinase                                                                                                | 356 | EC:3.4.21.88          | COG0468 | L   | TIGR02012 | No  | No  |
| Pellet                                   | 2005571400 | pfam00154                               | RecA/RadA recombinase                                                                                                | 254 |                       | COG0468 | L   | TIGR02012 | No  | No  |
| Pellet                                   | 2005581132 | pfam00154                               | RecA/RadA recombinase                                                                                                | 378 |                       | COG0468 | L   | TIGR02012 | No  | No  |
| Pellet                                   | 2005586786 | pfam00154                               | RecA/RadA recombinase                                                                                                | 411 |                       | COG0468 | L   | TIGR02012 | No  | No  |
| Pellet                                   | 2005579078 | pfam00270 pfam00271                     | RecG-like helicase                                                                                                   | 409 |                       | COG1200 | K L | TIGR00643 | No  | No  |
| Pellet                                   | 2005589491 | pfam00270 pfam00271 pfam01336           | RecG-like helicase                                                                                                   | 688 | EC:3.6.1.-            | COG1200 | K L | TIGR00643 | Yes | No  |
| Soluble                                  | 2005603255 |                                         | Recombinational DNA repair ATPase (RecF pathway)                                                                     | 261 |                       | COG1195 | L   |           | No  | No  |
| Soluble                                  | 2005629842 | pfam02463                               | Recombinational DNA repair ATPase (RecF pathway)                                                                     | 201 |                       | COG1195 | L   |           | No  | No  |
| Global                                   | 2005610627 | pfam01751 pfam02132                     | Recombinational DNA repair protein (RecF pathway)                                                                    | 182 |                       | COG0353 | L   | TIGR00615 | No  | No  |
| Pellet                                   | 2005579867 |                                         | Regulatory protein, P-II family                                                                                      | 270 |                       |         |     |           | No  | No  |
| Insoluble / Soluble / Supernatant        | 2005583132 | pfam00072                               | Response regulator containing a CheY-like receive r domain and a GGDEF domain                                        | 150 |                       | COG3437 | K T |           | No  | No  |
| Pellet                                   | 2005577132 | pfam00990                               | Response regulator containing a CheY-like receive r domain and a GGDEF domain                                        | 245 |                       | COG2199 | T   | TIGR00254 | No  | No  |
| Supernatant / Soluble                    | 2005565251 | pfam00072                               | Response regulator containing a CheY-like receive r domain and a GGDEF domain                                        | 151 |                       | COG3437 | T K |           | No  | No  |
| Global                                   | 2005622271 |                                         | Response regulator containing a CheY-like receive r domain and an HD-GYP domain                                      | 266 |                       | COG3437 | T K |           | No  | Yes |
| Pellet                                   | 2005560294 | pfam00072 pfam01966                     | Response regulator containing a CheY-like receive r domain and an HD-GYP domain                                      | 262 |                       | COG3437 | T K |           | No  | No  |
| Pellet                                   | 2005560299 | pfam01966                               | Response regulator containing a CheY-like receive r domain and an HD-GYP domain                                      | 576 |                       | COG3437 | T K |           | Yes | Yes |
| Pellet                                   | 2005566364 | pfam01966                               | Response regulator containing a CheY-like receive r domain and an HD-GYP domain                                      | 230 |                       | COG3437 | T K |           | No  | No  |
| Pellet                                   | 2005567217 | pfam01590 pfam01966                     | Response regulator containing a CheY-like receive r domain and an HD-GYP domain                                      | 425 |                       | COG3437 | T K |           | No  | No  |
| Pellet                                   | 2005572579 | pfam01590 pfam01966                     | Response regulator containing a CheY-like receive r domain and an HD-GYP domain                                      | 421 |                       | COG3437 | T K |           | No  | No  |
| Pellet                                   | 2005578858 | pfam00072 pfam01966                     | Response regulator containing a CheY-like receive r domain and an HD-GYP domain                                      | 263 |                       | COG3437 | T K |           | No  | No  |
| Pellet / Supernatant                     | 2005594958 | pfam00072                               | Response regulator containing a CheY-like receive r domain and an HD-GYP domain                                      | 150 |                       | COG3437 | K T |           | No  | No  |
| Pellet / Supernatant                     | 2005560618 | pfam00072 pfam01966                     | Response regulator containing a CheY-like receive r domain and an HD-GYP domain                                      | 351 |                       | COG3437 | T K |           | No  | No  |
| Soluble                                  | 2005562457 | pfam00072                               | Response regulator containing a CheY-like receive r domain and an HD-GYP domain                                      | 195 |                       | COG3437 | K T |           | No  | No  |
| Soluble                                  | 2005574213 | pfam00072 pfam00211                     | Response regulator containing a CheY-like receive r domain and an HD-GYP domain                                      | 206 |                       | COG3437 | T K |           | No  | No  |
| Soluble                                  | 2005574919 | pfam00072 pfam01966                     | Response regulator containing a CheY-like receive r domain and an HD-GYP domain                                      | 359 |                       | COG3437 | K T |           | No  | No  |
| Soluble / Supernatant                    | 2005580535 | pfam00072                               | Response regulator containing a CheY-like receive r domain and an HD-GYP domain                                      | 122 |                       | COG0745 | K T |           | No  | No  |
| Supernatant                              | 2005607328 | pfam00072                               | Response regulator containing CheY-like receiver and SARP domains                                                    | 127 |                       | COG4753 | T   |           | No  | No  |
| Pellet                                   | 2005615007 | pfam00072                               | Response regulators consisting of a CheY-like rec eiver domain and a winged-helix DNA-binding domain                 | 282 |                       | COG2204 | T   |           | No  | No  |
| Supernatant                              | 2005573481 | pfam00072                               | Response regulators consisting of a CheY-like rec eiver domain and a winged-helix DNA-binding domain                 | 139 |                       | COG0745 | T K |           | No  | No  |
| Pellet                                   | 2005615485 |                                         | Restriction endonuclease S subunits                                                                                  | 142 |                       |         |     |           | No  | No  |
| Pellet                                   | 2005576800 | pfam00078 pfam08388                     | Retron-type reverse transcriptase                                                                                    | 518 | EC:2.7.7.49           | COG3344 | L   |           | No  | No  |
| Supernatant                              | 2005600858 |                                         | Retron-type reverse transcriptase                                                                                    | 263 |                       |         |     |           | No  | No  |
| Pellet                                   | 2005575120 | pfam00885                               | Riboflavin synthase beta-chain                                                                                       | 154 | EC:2.5.1.9 EC:6.3.3.- | COG0054 | H   | TIGR00114 | No  | No  |
| Supernatant                              | 2005582384 | pfam00885                               | Riboflavin synthase beta-chain                                                                                       | 154 | EC:2.5.1.9 EC:6.3.3.- | COG0054 | H   | TIGR00114 | No  | No  |
| Pellet                                   | 2005592382 | pfam00027                               | Ribonuclease BN-like family protein                                                                                  | 175 |                       | COG0664 | T   |           | No  | No  |
| Pellet                                   | 2005605103 | pfam01351                               | Ribonuclease HII                                                                                                     | 196 | EC:3.1.26.4           | COG0164 | L   |           | No  | No  |
| Pellet                                   | 2005564114 | pfam10150                               | Ribonucleases G and E                                                                                                | 291 |                       | COG1530 | J   | TIGR00757 | No  | No  |
| Insoluble / Supernatant                  | 2005584104 |                                         | Ribonucleotide reductase, alpha subunit                                                                              | 171 |                       |         |     |           | No  | No  |
| Pellet                                   | 2005561895 | pfam08471                               | Ribonucleotide reductase, alpha subunit                                                                              | 488 |                       | COG0209 | F   |           | No  | No  |
| Pellet                                   | 2005561896 |                                         | Ribonucleotide reductase, alpha subunit                                                                              | 552 |                       | COG0209 | F   |           | No  | No  |
| Pellet                                   | 2005584103 | pfam02867                               | Ribonucleotide reductase, alpha subunit                                                                              | 419 |                       | COG0209 | F   | TIGR02504 | No  | No  |
| Supernatant                              | 2005563135 | pfam06026                               | Ribose 5-phosphate isomerase                                                                                         | 104 |                       | COG0120 | G   | TIGR00021 | No  | No  |
| Pellet                                   | 2005566549 | pfam00687                               | Ribosomal protein L1                                                                                                 | 226 |                       | COG0081 | J   | TIGR01169 | No  | No  |
| Pellet / Soluble                         | 2005569710 | pfam00687                               | Ribosomal protein L1                                                                                                 | 227 |                       | COG0081 | J   | TIGR01169 | No  | No  |
| Pellet / Soluble                         | 2005566551 | pfam00687                               | Ribosomal protein L1                                                                                                 | 72  |                       | COG0081 | J   |           | No  | No  |
| Pellet / Soluble / Supernatant           | 2005572501 | pfam00687                               | Ribosomal protein L1                                                                                                 | 225 |                       | COG0081 | J   | TIGR01169 | Yes | No  |
| Pellet / Supernatant                     | 2005579443 | pfam00687                               | Ribosomal protein L1                                                                                                 | 227 |                       | COG0081 | J   | TIGR01169 | No  | No  |
| Pellet / Supernatant                     | 2005591641 | pfam00687                               | Ribosomal protein L1                                                                                                 | 226 |                       | COG0081 | J   | TIGR01169 | No  | No  |
| Soluble                                  | 2005563230 | pfam00687                               | Ribosomal protein L1                                                                                                 | 205 |                       | COG0081 | J   | TIGR01169 | No  | No  |
| Soluble                                  | 2005591601 | pfam00687                               | Ribosomal protein L1                                                                                                 | 229 |                       | COG0081 | J   | TIGR01169 | No  | No  |
| Soluble                                  | 2005628420 | pfam00687                               | Ribosomal protein L1                                                                                                 | 201 |                       | COG0081 | J   | TIGR01169 | No  | No  |
| Pellet                                   | 2005566552 | pfam00466                               | Ribosomal protein L10                                                                                                | 179 |                       | COG0244 | J   |           | No  | No  |
| Pellet                                   | 2005580525 | pfam00466                               | Ribosomal protein L10                                                                                                | 183 |                       | COG0244 | J   |           | No  | No  |
| Pellet                                   | 2005591642 | pfam00298 pfam03946                     | Ribosomal protein L11                                                                                                | 143 |                       | COG0080 | J   | TIGR01632 | No  | No  |
| Pellet / Insoluble / Soluble             | 2005563231 | pfam00298 pfam03946                     | Ribosomal protein L11                                                                                                | 140 |                       | COG0080 | J   | TIGR01632 | No  | No  |
| Supernatant / Soluble                    | 2005566548 | pfam00298 pfam03946                     | Ribosomal protein L11                                                                                                | 143 |                       | COG0080 | J   | TIGR01632 | No  | No  |
| Pellet                                   | 2005617939 | pfam06325                               | Ribosomal protein L11 methylase                                                                                      | 190 |                       | COG2264 | J   |           | No  | No  |
| Insoluble / Supernatant                  | 2005572445 | pfam00572                               | Ribosomal protein L13                                                                                                | 88  |                       | COG0102 | J   | TIGR01066 | No  | No  |
| Pellet                                   | 2005611237 | pfam00572                               | Ribosomal protein L13                                                                                                | 137 |                       | COG0102 | J   | TIGR01066 | No  | No  |
| Global                                   | 2005578009 | pfam00238                               | Ribosomal protein L14                                                                                                | 123 |                       | COG0093 | J   | TIGR01067 | No  | No  |
| Supernatant                              | 2005570327 | pfam00238                               | Ribosomal protein L14                                                                                                | 113 |                       | COG0093 | J   | TIGR01067 | No  | No  |
| Pellet                                   | 2005627536 | pfam00256 pfam01305                     | Ribosomal protein L15                                                                                                | 148 |                       | COG0200 | J   | TIGR01071 | No  | No  |
| Pellet / Supernatant / Soluble           | 2005563170 | pfam00256 pfam01305                     | Ribosomal protein L15                                                                                                | 149 |                       | COG0200 | J   | TIGR01071 | No  | No  |
| Supernatant                              | 2005562943 | pfam00256 pfam01305                     | Ribosomal protein L15                                                                                                | 166 |                       | COG0200 | J   | TIGR01071 | No  | No  |
| Supernatant                              | 2005565451 | pfam00256 pfam01305                     | Ribosomal protein L15                                                                                                | 169 |                       | COG0200 | J   | TIGR01071 | No  | No  |

|                                         |            |  |                     |                                                     |     |  |         |   |           |     |    |
|-----------------------------------------|------------|--|---------------------|-----------------------------------------------------|-----|--|---------|---|-----------|-----|----|
| Insoluble                               | 2005570331 |  | pfam00252           | Ribosomal protein L16/L10E                          | 137 |  | COG0197 | J | TIGR01164 | No  | No |
| Insoluble                               | 2005576197 |  | pfam00252           | Ribosomal protein L16/L10E                          | 137 |  | COG0197 | J | TIGR01164 | No  | No |
| Pellet                                  | 2005570330 |  | pfam00252           | Ribosomal protein L16/L10E                          | 83  |  | COG0197 | J | TIGR01164 | No  | No |
| Pellet                                  | 2005588704 |  | pfam00252           | Ribosomal protein L16/L10E                          | 142 |  | COG0197 | J | TIGR01164 | No  | No |
| Global                                  | 2005579761 |  | pfam01196           | Ribosomal protein L17                               | 154 |  | COG0203 | J | TIGR00059 | Yes | No |
| Pellet                                  | 2005560675 |  | pfam01196           | Ribosomal protein L17                               | 91  |  | COG0203 | J | TIGR00059 | No  | No |
| Pellet                                  | 2005619560 |  | pfam01196           | Ribosomal protein L17                               | 152 |  | COG0203 | J | TIGR00059 | No  | No |
| Global                                  | 2005562940 |  | pfam00861           | Ribosomal protein L18                               | 120 |  | COG0256 | J | TIGR00060 | No  | No |
| Pellet                                  | 2005585555 |  | pfam00861           | Ribosomal protein L18                               | 72  |  | COG0256 | J | TIGR00060 | No  | No |
| Pellet                                  | 2005595565 |  | pfam00861           | Ribosomal protein L18                               | 120 |  | COG0256 | J | TIGR00060 | No  | No |
| Soluble                                 | 2005572282 |  | pfam00861           | Ribosomal protein L18                               | 120 |  | COG0256 | J | TIGR00060 | No  | No |
| Supernatant                             | 2005582569 |  | pfam01245           | Ribosomal protein L19                               | 141 |  | COG0335 | J | TIGR01024 | No  | No |
| Pellet                                  | 2005560126 |  | pfam00181 pfam03947 | Ribosomal protein L2                                | 255 |  | COG0090 | J | TIGR01171 | No  | No |
| Pellet                                  | 2005576201 |  | pfam00181 pfam03947 | Ribosomal protein L2                                | 278 |  | COG0090 | J | TIGR01171 | No  | No |
| Pellet                                  | 2005588696 |  | pfam00181 pfam03947 | Ribosomal protein L2                                | 276 |  | COG0090 | J | TIGR01171 | No  | No |
| Pellet / Supernatant                    | 2005604729 |  | pfam00181 pfam03947 | Ribosomal protein L2                                | 252 |  | COG0090 | J | TIGR01171 | No  | No |
| Soluble / Supernatant                   | 2005570335 |  | pfam00181 pfam03947 | Ribosomal protein L2                                | 278 |  | COG0090 | J | TIGR01171 | No  | No |
| Supernatant / Insoluble                 | 2005567190 |  | pfam00181 pfam03947 | Ribosomal protein L2                                | 276 |  | COG0090 | J | TIGR01171 | No  | No |
| Global                                  | 2005562369 |  | pfam00453           | Ribosomal protein L20                               | 60  |  | COG0292 | J | TIGR01032 | No  | No |
| Global                                  | 2005586208 |  | pfam00453           | Ribosomal protein L20                               | 101 |  | COG0292 | J | TIGR01032 | No  | No |
| Pellet                                  | 2005588922 |  | pfam00453           | Ribosomal protein L20                               | 119 |  | COG0292 | J | TIGR01032 | No  | No |
| Pellet                                  | 2005618266 |  | pfam00453           | Ribosomal protein L20                               | 119 |  | COG0292 | J | TIGR01032 | No  | No |
| Global / Insoluble                      | 2005570333 |  | pfam00237           | Ribosomal protein L22                               | 140 |  | COG0091 | J | TIGR01044 | No  | No |
| Insoluble / Pellet / Supernatant        | 2005570984 |  | pfam00237           | Ribosomal protein L22                               | 134 |  | COG0091 | J | TIGR01044 | No  | No |
| Pellet                                  | 2005581780 |  | pfam00237           | Ribosomal protein L22                               | 141 |  | COG0091 | J | TIGR01044 | No  | No |
| Pellet                                  | 2005567189 |  | pfam00276           | Ribosomal protein L23                               | 95  |  | COG0089 | J |           | No  | No |
| Pellet                                  | 2005570336 |  | pfam00276           | Ribosomal protein L23                               | 104 |  | COG0089 | J |           | No  | No |
| Supernatant                             | 2005581783 |  | pfam00276           | Ribosomal protein L23                               | 95  |  | COG0089 | J |           | No  | No |
| Pellet                                  | 2005578010 |  | pfam00467           | Ribosomal protein L24                               | 106 |  | COG0198 | J | TIGR01079 | No  | No |
| Pellet                                  | 2005581776 |  | pfam00467           | Ribosomal protein L24                               | 107 |  | COG0198 | J | TIGR01079 | No  | No |
| Pellet                                  | 2005568378 |  |                     | Ribosomal protein L25 (general stress protein Ctc ) | 130 |  |         |   |           | No  | No |
| Pellet / Supernatant / Global           | 2005560278 |  | pfam01386           | Ribosomal protein L25 (general stress protein Ctc ) | 214 |  | COG1825 | J | TIGR00731 | No  | No |
| Supernatant                             | 2005590093 |  |                     | Ribosomal protein L25 (general stress protein Ctc ) | 206 |  | COG1825 | J | TIGR00731 | No  | No |
| Supernatant                             | 2005611822 |  |                     | Ribosomal protein L25 (general stress protein Ctc ) | 186 |  |         |   | TIGR00731 | No  | No |
| Supernatant                             | 2005626130 |  | pfam01386           | Ribosomal protein L25 (general stress protein Ctc ) | 214 |  | COG1825 | J | TIGR00731 | No  | No |
| Pellet                                  | 2005614716 |  | pfam01016           | Ribosomal protein L27                               | 89  |  | COG0211 | J | TIGR00062 | No  | No |
| Pellet                                  | 2005627978 |  | pfam01016           | Ribosomal protein L27                               | 84  |  | COG0211 | J | TIGR00062 | No  | No |
| Pellet                                  | 2005560132 |  | pfam00831           | Ribosomal protein L29                               | 68  |  | COG0255 | J | TIGR00012 | No  | No |
| Pellet                                  | 2005588705 |  | pfam00831           | Ribosomal protein L29                               | 74  |  |         |   | TIGR00012 | No  | No |
| Insoluble / Soluble / Supernatant       | 2005560679 |  | pfam00297           | Ribosomal protein L3                                | 163 |  | COG0087 | J |           | No  | No |
| Pellet                                  | 2005561121 |  | pfam00297           | Ribosomal protein L3                                | 206 |  | COG0087 | J |           | No  | No |
| Pellet                                  | 2005573864 |  | pfam00297           | Ribosomal protein L3                                | 210 |  | COG0087 | J |           | No  | No |
| Pellet                                  | 2005581786 |  | pfam00297           | Ribosomal protein L3                                | 208 |  | COG0087 | J |           | No  | No |
| Pellet                                  | 2005588693 |  | pfam00297           | Ribosomal protein L3                                | 208 |  | COG0087 | J |           | No  | No |
| Supernatant / Soluble                   | 2005566447 |  | pfam00297           | Ribosomal protein L3                                | 210 |  | COG0087 | J |           | No  | No |
| Pellet / Supernatant                    | 2005623484 |  | pfam01197           | Ribosomal protein L31                               | 101 |  | COG0254 | J | TIGR00105 | No  | No |
| Pellet                                  | 2005588923 |  | pfam01632           | Ribosomal protein L35                               | 66  |  | COG0291 | J | TIGR00001 | No  | No |
| Pellet / Supernatant                    | 2005587747 |  | pfam01632           | Ribosomal protein L35                               | 66  |  | COG0291 | J | TIGR00001 | No  | No |
| Pellet                                  | 2005561122 |  | pfam00573           | Ribosomal protein L4                                | 205 |  | COG0088 | J |           | No  | No |
| Pellet                                  | 2005581785 |  | pfam00573           | Ribosomal protein L4                                | 212 |  | COG0088 | J |           | No  | No |
| Pellet                                  | 2005615800 |  | pfam00573           | Ribosomal protein L4                                | 117 |  | COG0088 | J |           | Yes | No |
| Pellet / Supernatant                    | 2005593755 |  | pfam00573           | Ribosomal protein L4                                | 212 |  | COG0088 | J |           | No  | No |
| Global / Soluble / Supernatant          | 2005578011 |  | pfam00281 pfam00673 | Ribosomal protein L5                                | 118 |  | COG0094 | J |           | No  | No |
| Insoluble                               | 2005585551 |  | pfam00281 pfam00673 | Ribosomal protein L5                                | 194 |  | COG0094 | J |           | No  | No |
| Pellet                                  | 2005598453 |  | pfam00347           | Ribosomal protein L6P/L9E                           | 133 |  | COG0097 | J |           | No  | No |
| Pellet                                  | 2005608863 |  | pfam00347           | Ribosomal protein L6P/L9E                           | 137 |  | COG0097 | J |           | No  | No |
| Global                                  | 2005580526 |  | pfam00542           | Ribosomal protein L7/L12                            | 129 |  | COG0222 | J | TIGR00855 | Yes | No |
| Global / Pellet                         | 2005569712 |  | pfam00542           | Ribosomal protein L7/L12                            | 128 |  | COG0222 | J | TIGR00855 | No  | No |
| Global / Pellet / Soluble / Supernatant | 2005593474 |  | pfam00542           | Ribosomal protein L7/L12                            | 130 |  | COG0222 | J | TIGR00855 | No  | No |
| Global / Soluble                        | 2005591639 |  | pfam00542           | Ribosomal protein L7/L12                            | 127 |  | COG0222 | J | TIGR00855 | No  | No |
| Insoluble / Soluble                     | 2005573265 |  | pfam00542           | Ribosomal protein L7/L12                            | 128 |  | COG0222 | J | TIGR00855 | Yes | No |
| Pellet / Global                         | 2005566553 |  | pfam00542           | Ribosomal protein L7/L12                            | 128 |  | COG0222 | J | TIGR00855 | No  | No |
| Pellet / Soluble                        | 2005586614 |  | pfam00542           | Ribosomal protein L7/L12                            | 49  |  | COG0222 | J | TIGR00855 | No  | No |
| Pellet / Soluble                        | 2005599203 |  | pfam00542           | Ribosomal protein L7/L12                            | 128 |  | COG0222 | J | TIGR00855 | No  | No |
| Pellet / Supernatant                    | 2005586265 |  | pfam00542           | Ribosomal protein L7/L12                            | 114 |  | COG0222 | J | TIGR00855 | Yes | No |
| Pellet / Supernatant                    | 2005591635 |  | pfam00542           | Ribosomal protein L7/L12                            | 128 |  | COG0222 | J | TIGR00855 | No  | No |
| Pellet / Supernatant                    | 2005579196 |  | pfam01281 pfam03948 | Ribosomal protein L9                                | 196 |  | COG0359 | J | TIGR00158 | No  | No |
| Supernatant                             | 2005568597 |  | pfam01281 pfam03948 | Ribosomal protein L9                                | 201 |  | COG0359 | J | TIGR00158 | No  | No |
| Pellet                                  | 2005617899 |  | pfam00575           | Ribosomal protein S1                                | 264 |  | COG0539 | J |           | No  | No |
| Supernatant                             | 2005578094 |  | pfam00575           | Ribosomal protein S1                                | 168 |  | COG0539 | J |           | No  | No |
| Global                                  | 2005566448 |  | pfam00338           | Ribosomal protein S10                               | 54  |  | COG0051 | J | TIGR01049 | No  | No |
| Pellet                                  | 2005567186 |  | pfam00338           | Ribosomal protein S10                               | 96  |  | COG0051 | J | TIGR01049 | No  | No |
| Pellet                                  | 2005573861 |  | pfam00338           | Ribosomal protein S10                               | 102 |  | COG0051 | J | TIGR01049 | No  | No |
| Pellet                                  | 2005604350 |  | pfam00338           | Ribosomal protein S10                               | 102 |  | COG0051 | J | TIGR01049 | No  | No |
| Supernatant / Soluble                   | 2005561120 |  | pfam00338           | Ribosomal protein S10                               | 84  |  | COG0051 | J | TIGR01049 | No  | No |
| Global                                  | 2005578458 |  | pfam00411           | Ribosomal protein S11                               | 145 |  | COG0100 | J |           | No  | No |
| Pellet / Supernatant                    | 2005586151 |  | pfam00164           | Ribosomal protein S12                               | 133 |  | COG0048 | J | TIGR00981 | No  | No |
| Pellet                                  | 2005574596 |  | pfam00416           | Ribosomal protein S13                               | 122 |  | COG0099 | J |           | No  | No |
| Pellet                                  | 2005578457 |  | pfam00416           | Ribosomal protein S13                               | 83  |  | COG0099 | J |           | No  | No |
| Global                                  | 2005576251 |  | pfam00312           | Ribosomal protein S15P/S13E                         | 89  |  | COG0184 | J | TIGR00952 | No  | No |
| Pellet                                  | 2005601207 |  | pfam00312           | Ribosomal protein S15P/S13E                         | 89  |  | COG0184 | J | TIGR00952 | No  | No |
| Pellet                                  | 2005588706 |  | pfam00366           | Ribosomal protein S17                               | 90  |  | COG0186 | J |           | No  | No |
| Pellet                                  | 2005561941 |  | pfam01084           | Ribosomal protein S18                               | 110 |  | COG0238 | J | TIGR00165 | No  | No |
| Soluble                                 | 2005599939 |  | pfam01084           | Ribosomal protein S18                               | 117 |  | COG0238 | J | TIGR00165 | No  | No |
| Pellet                                  | 2005596654 |  | pfam00203           | Ribosomal protein S19                               | 93  |  | COG0185 | J | TIGR01050 | No  | No |
| Pellet / Soluble / Supernatant          | 2005568317 |  | pfam00203           | Ribosomal protein S19                               | 93  |  | COG0185 | J | TIGR01050 | No  | No |
| Soluble                                 | 2005560127 |  | pfam00203           | Ribosomal protein S19                               | 94  |  | COG0185 | J | TIGR01050 | No  | No |

|                                                     |            |                                         |                                                                      |     |             |         |     |                     |     |     |
|-----------------------------------------------------|------------|-----------------------------------------|----------------------------------------------------------------------|-----|-------------|---------|-----|---------------------|-----|-----|
| Supernatant                                         | 2005569107 | pfam00203                               | Ribosomal protein S19                                                | 93  |             | COG0185 | J   | TIGR01050           | No  | No  |
| Global                                              | 2005567403 | pfam00318                               | Ribosomal protein S2                                                 | 291 |             | COG0052 | J   | TIGR01011           | No  | No  |
| Global                                              | 2005612962 | pfam00318                               | Ribosomal protein S2                                                 | 190 |             | COG0052 | J   | TIGR01011           | No  | No  |
| Pellet                                              | 2005572173 | pfam00318                               | Ribosomal protein S2                                                 | 305 |             | COG0052 | J   | TIGR01011           | No  | No  |
| Pellet                                              | 2005580608 | pfam00318                               | Ribosomal protein S2                                                 | 277 |             | COG0052 | J   | TIGR01011           | No  | No  |
| Supernatant / Insoluble                             | 2005565738 | pfam00318                               | Ribosomal protein S2                                                 | 148 |             | COG0052 | J   |                     | No  | No  |
| Supernatant                                         | 2005620820 | pfam01165                               | Ribosomal protein S21                                                | 67  |             |         |     | TIGR00030           | No  | No  |
| Insoluble                                           | 2005560845 | pfam00189 pfam00417 pfam07650           | Ribosomal protein S3                                                 | 244 |             | COG0092 | J   | TIGR01009           | No  | No  |
| Insoluble                                           | 2005570332 | pfam00189 pfam00417 pfam07650           | Ribosomal protein S3                                                 | 222 |             | COG0092 | J   | TIGR01009           | No  | No  |
| Pellet                                              | 2005567192 | pfam00417 pfam07650                     | Ribosomal protein S3                                                 | 120 |             | COG0092 | J   | TIGR01009           | No  | No  |
| Pellet                                              | 2005568695 | pfam00189 pfam07650                     | Ribosomal protein S3                                                 | 207 |             | COG0092 | J   | TIGR01009           | No  | No  |
| Pellet                                              | 2005581779 | pfam00417 pfam07650                     | Ribosomal protein S3                                                 | 96  |             | COG0092 | J   | TIGR01009           | No  | No  |
| Pellet                                              | 2005588703 | pfam00189 pfam00417 pfam07650           | Ribosomal protein S3                                                 | 234 |             | COG0092 | J   | TIGR01009           | No  | No  |
| Pellet                                              | 2005607192 | pfam00189 pfam00417 pfam07650           | Ribosomal protein S3                                                 | 216 |             | COG0092 | J   | TIGR01009           | No  | No  |
| Soluble                                             | 2005560129 | pfam00189 pfam00417 pfam07650           | Ribosomal protein S3                                                 | 223 |             | COG0092 | J   | TIGR01009           | Yes | No  |
| Supernatant                                         | 2005578001 | pfam00189 pfam00417 pfam07650           | Ribosomal protein S3                                                 | 236 |             | COG0092 | J   | TIGR01009           | No  | No  |
| Pellet                                              | 2005603251 |                                         | Ribosomal protein S4 and related proteins                            | 82  |             | COG0522 | J   |                     | No  | No  |
| Pellet / Supernatant / Insoluble                    | 2005560362 | pfam00163 pfam01479                     | Ribosomal protein S4 and related proteins                            | 200 |             | COG0522 | J   | TIGR01017           | No  | No  |
| Insoluble                                           | 2005565454 | pfam00333 pfam03719                     | Ribosomal protein S5                                                 | 217 |             | COG0098 | J   | TIGR01021           | No  | No  |
| Pellet                                              | 2005591506 | pfam00333 pfam03719                     | Ribosomal protein S5                                                 | 229 |             | COG0098 | J   | TIGR01021           | No  | No  |
| Soluble                                             | 2005562942 | pfam00333 pfam03719                     | Ribosomal protein S5                                                 | 134 |             | COG0098 | J   | TIGR01021           | No  | No  |
| Pellet                                              | 2005599448 | pfam00177                               | Ribosomal protein S7                                                 | 75  |             | COG0049 | J   |                     | No  | No  |
| Pellet                                              | 2005609290 | pfam00177                               | Ribosomal protein S7                                                 | 156 |             | COG0049 | J   | TIGR01029           | No  | No  |
| Supernatant                                         | 2005566247 | pfam00177                               | Ribosomal protein S7                                                 | 156 |             | COG0049 | J   | TIGR01029           | No  | No  |
| Pellet                                              | 2005581492 | pfam00410                               | Ribosomal protein S8                                                 | 58  |             | COG0096 | J   |                     | No  | No  |
| Pellet                                              | 2005585550 | pfam00410                               | Ribosomal protein S8                                                 | 132 |             | COG0096 | J   |                     | No  | No  |
| Soluble                                             | 2005621597 | pfam01765                               | Ribosome recycling factor                                            | 153 |             | COG0233 | J   | TIGR00496           | Yes | No  |
| Global                                              | 2005620725 | pfam00076                               | RNA-binding proteins (RRM domain)                                    | 82  |             | COG0724 | R   |                     | No  | No  |
| Global / Pellet / Supernatant                       | 2005576924 | pfam00076                               | RNA-binding proteins (RRM domain)                                    | 96  |             | COG0724 | R   |                     | Yes | No  |
| Pellet / Soluble                                    | 2005620907 | pfam00076                               | RNA-binding proteins (RRM domain)                                    | 90  |             | COG0724 | R   |                     | No  | No  |
| Pellet / Soluble / Global                           | 2005623506 | pfam00076                               | RNA-binding proteins (RRM domain)                                    | 92  |             | COG0724 | R   |                     | Yes | No  |
| Pellet                                              | 2005563004 | pfam00588 pfam08032                     | rRNA methylases                                                      | 279 | EC:2.1.1.-  | COG0566 | J   |                     | No  | No  |
| Pellet                                              | 2005567558 | pfam00588 pfam08032                     | rRNA methylases                                                      | 261 |             | COG0566 | J   |                     | No  | No  |
| Global                                              | 2005584209 | pfam02915                               | Rubryerythrin                                                        | 102 |             | COG1592 | C   |                     | No  | No  |
| Pellet                                              | 2005564589 | pfam02915                               | Rubryerythrin                                                        | 174 |             | COG1592 | C   |                     | No  | No  |
| Pellet / Supernatant                                | 2005571543 | pfam02915                               | Rubryerythrin                                                        | 191 |             | COG1592 | C   |                     | No  | No  |
| Soluble                                             | 2005578400 | pfam00301 pfam02915                     | Rubryerythrin                                                        | 180 |             | COG1592 | C   |                     | No  | No  |
| Soluble                                             | 2005596710 | pfam02915                               | Rubryerythrin                                                        | 180 |             | COG1592 | C   |                     | No  | No  |
| Soluble                                             | 2005626921 | pfam00301 pfam02915                     | Rubryerythrin                                                        | 141 |             | COG1592 | C   |                     | No  | No  |
| Supernatant                                         | 2005611516 | pfam02915                               | Rubryerythrin                                                        | 90  |             | COG1592 | C   |                     | No  | No  |
| Global                                              | 2005565301 | pfam05221                               | S-adenosylhomocysteine hydrolase                                     | 164 |             | COG0499 | H   | TIGR00936           | No  | No  |
| Global / Insoluble                                  | 2005592642 | pfam00670 pfam05221                     | S-adenosylhomocysteine hydrolase                                     | 290 |             | COG0499 | H   | TIGR00936           | No  | No  |
| Pellet                                              | 2005567130 | pfam00670 pfam05221                     | S-adenosylhomocysteine hydrolase                                     | 330 | EC:3.3.1.1  | COG0499 | H   | TIGR00936           | Yes | No  |
| Pellet                                              | 2005605439 | pfam00670 pfam05221                     | S-adenosylhomocysteine hydrolase                                     | 126 |             | COG0499 | H   |                     | No  | No  |
| Pellet / Soluble                                    | 2005570537 | pfam00670 pfam05221                     | S-adenosylhomocysteine hydrolase                                     | 283 |             | COG0499 | H   | TIGR00936           | No  | No  |
| Pellet                                              | 2005594873 | pfam02675                               | S-adenosylmethionine decarboxylase                                   | 214 | EC:4.1.1.50 | COG1586 | E   | TIGR03331           | No  | No  |
| Insoluble / Supernatant                             | 2005586497 | pfam00438 pfam02772 pfam02773           | S-adenosylmethionine synthetase                                      | 267 | EC:2.5.1.6  | COG0192 | H   | TIGR01034           | No  | No  |
| Pellet                                              | 2005604604 | pfam02772 pfam02773                     | S-adenosylmethionine synthetase                                      | 266 |             | COG0192 | H   | TIGR01034           | No  | No  |
| Pellet                                              | 2005613174 | pfam02772 pfam02773                     | S-adenosylmethionine synthetase                                      | 215 |             | COG0192 | H   | TIGR01034           | No  | No  |
| Pellet / Soluble                                    | 2005615734 | pfam02772 pfam02773                     | S-adenosylmethionine synthetase                                      | 265 | EC:2.5.1.6  | COG0192 | H   | TIGR01034           | No  | No  |
| Pellet / Soluble / Global                           | 2005565910 | pfam00438 pfam02772 pfam02773           | S-adenosylmethionine synthetase                                      | 393 | EC:2.5.1.6  | COG0192 | H   | TIGR01034           | No  | No  |
| Pellet / Supernatant / Insoluble / Soluble / Global | 2005566275 | pfam00438 pfam02772 pfam02773           | S-adenosylmethionine synthetase                                      | 310 | EC:2.5.1.6  | COG0192 | H   | TIGR01034           | No  | No  |
| Soluble                                             | 2005583781 | pfam02772 pfam02773                     | S-adenosylmethionine synthetase                                      | 275 |             | COG0192 | H   | TIGR01034           | No  | No  |
| Pellet                                              | 2005623842 | pfam00515 pfam07719                     | SAM (And some other nucleotide) binding motif                        | 294 |             |         |     |                     | No  | No  |
| Soluble                                             | 2005579326 | pfam08241                               | SAM-dependent methyltransferases                                     | 269 |             | COG2226 | H   |                     | No  | No  |
| Supernatant                                         | 2005626029 |                                         | SC2H4.13c                                                            | 178 |             |         |     |                     | No  | No  |
| Soluble                                             | 2005593533 |                                         | Secreted hemolysin-type calcium-binding bacteriocin, putative        | 493 |             |         |     |                     | Yes | No  |
| Pellet                                              | 2005571961 | pfam00266                               | Selenocysteine lyase                                                 | 249 |             | COG0520 | E   |                     | No  | No  |
| Pellet                                              | 2005572017 | pfam00266                               | Selenocysteine lyase                                                 | 479 | EC:4.4.1.16 | COG0520 | E   | TIGR01979           | No  | No  |
| Pellet / Soluble                                    | 2005579630 | pfam00266                               | Selenocysteine lyase                                                 | 180 |             | COG0520 | E   |                     | No  | No  |
| Pellet / Supernatant                                | 2005592439 | pfam00266                               | Selenocysteine lyase                                                 | 218 |             | COG0520 | E   |                     | No  | No  |
| Soluble                                             | 2005568579 | pfam00266                               | Selenocysteine lyase                                                 | 472 | EC:4.4.1.16 | COG0520 | E   | TIGR01979           | No  | No  |
| Supernatant                                         | 2005574601 | pfam00266                               | Selenocysteine lyase                                                 | 220 |             | COG0520 | E   |                     | No  | No  |
| Soluble                                             | 2005619845 | pfam08448                               | Sensory box histidine kinase/response regulator                      | 244 |             |         |     |                     | No  | Yes |
| Pellet / Supernatant                                | 2005566711 | pfam00132                               | Serine acetyltransferase                                             | 310 | EC:2.3.1.30 | COG1045 | E   | TIGR01172           | No  | No  |
| Pellet                                              | 2005569078 | pfam07475                               | Serine kinase of the HPr protein, regulates carbohydrate metabolism  | 220 |             | COG1493 | T   | TIGR00679           | No  | No  |
| Pellet                                              | 2005571415 | pfam07475                               | Serine kinase of the HPr protein, regulates carbohydrate metabolism  | 171 |             | COG1493 | T   | TIGR00679           | No  | No  |
| Soluble                                             | 2005580774 | pfam00672 pfam07228                     | Serine phosphatase RsbU, regulator of sigma subunit                  | 435 |             | COG2208 | T K |                     | No  | Yes |
| Soluble                                             | 2005562071 | pfam00266 pfam01128                     | Serine-pyruvate aminotransferase/archaeal aspartate aminotransferase | 611 |             | COG0075 | E   | TIGR03301           | No  | No  |
| Insoluble                                           | 2005576116 | pfam00587                               | Seryl-tRNA synthetase                                                | 294 |             | COG0172 | J   | TIGR00414           | No  | No  |
| Pellet                                              | 2005612391 | pfam00587                               | Seryl-tRNA synthetase                                                | 184 |             | COG0172 | J   |                     | No  | No  |
| Soluble                                             | 2005560297 | pfam00587                               | Seryl-tRNA synthetase                                                | 301 |             | COG0172 | J   | TIGR00414           | No  | No  |
| Soluble                                             | 2005567852 | pfam00587                               | Seryl-tRNA synthetase                                                | 320 | EC:6.1.1.11 | COG0172 | J   | TIGR00414           | No  | No  |
| Pellet                                              | 2005612468 | pfam01487 pfam08501                     | Shikimate 5-dehydrogenase                                            | 295 |             | COG0169 | E   | TIGR01093           | Yes | No  |
| Soluble                                             | 2005563931 | pfam01487 pfam01488 pfam08501           | Shikimate 5-dehydrogenase                                            | 511 | EC:1.1.1.25 | COG0169 | E   | TIGR00507 TIGR01093 | No  | No  |
| Pellet                                              | 2005561518 | pfam00448 pfam02881 pfam02978           | Signal recognition particle GTPase                                   | 447 | EC:3.6.5.4  | COG0541 | U   | TIGR00959           | No  | No  |
| Pellet                                              | 2005620973 | pfam00448 pfam02881                     | Signal recognition particle GTPase                                   | 172 |             | COG0541 | U   |                     | No  | No  |
| Global                                              | 2005565250 | pfam00072 pfam00512 pfam02518           | Signal transduction histidine kinase                                 | 670 |             | COG0642 | T   |                     | No  | No  |
| Global                                              | 2005576906 | pfam00072 pfam00512 pfam02518           | Signal transduction histidine kinase                                 | 822 |             | COG0642 | T   | TIGR00229           | No  | No  |
| Global                                              | 2005584102 | pfam00512 pfam02518                     | Signal transduction histidine kinase                                 | 503 |             | COG0642 | T   |                     | No  | Yes |
| Insoluble                                           | 2005565660 | pfam00072 pfam00512 pfam02518           | Signal transduction histidine kinase                                 | 484 |             | COG0642 | T   |                     | No  | No  |
| Insoluble                                           | 2005593940 | pfam00072 pfam00512 pfam02518           | Signal transduction histidine kinase                                 | 681 |             | COG0642 | T   |                     | No  | Yes |
| Pellet                                              | 2005562992 | pfam00512 pfam01590 pfam02518           | Signal transduction histidine kinase                                 | 601 |             | COG0642 | T   |                     | Yes | Yes |
| Pellet                                              | 2005563165 | pfam00072 pfam00512 pfam02518 pfam08447 | Signal transduction histidine kinase                                 | 929 |             | COG0642 | T   | TIGR00229           | Yes | No  |
| Pellet                                              | 2005564127 | pfam00072 pfam00512 pfam02518           | Signal transduction histidine kinase                                 | 518 |             | COG0642 | T   |                     | No  | No  |
| Pellet                                              | 2005564250 | pfam00512 pfam02518                     | Signal transduction histidine kinase                                 | 507 |             | COG0642 | T   | TIGR00229           | No  | Yes |
| Pellet                                              | 2005564675 | pfam00072 pfam00512 pfam02518           | Signal transduction histidine kinase                                 | 661 |             | COG0642 | T   |                     | Yes | Yes |

|                                  |            |                                         |                                                                                                                                                                  |     |              |         |     |           |     |     |
|----------------------------------|------------|-----------------------------------------|------------------------------------------------------------------------------------------------------------------------------------------------------------------|-----|--------------|---------|-----|-----------|-----|-----|
| Pellet                           | 2005564676 | pfam00512 pfam02518                     | Signal transduction histidine kinase                                                                                                                             | 651 |              | COG0642 | T   |           | Yes | Yes |
| Pellet                           | 2005565497 | pfam00512 pfam02518                     | Signal transduction histidine kinase                                                                                                                             | 460 |              | COG0642 | T   |           | No  | Yes |
| Pellet                           | 2005566678 | pfam00072 pfam00512 pfam01627 pfam02518 | Signal transduction histidine kinase                                                                                                                             | 812 |              | COG0642 | T   |           | Yes | Yes |
| Pellet                           | 2005567375 | pfam00512 pfam02518                     | Signal transduction histidine kinase                                                                                                                             | 554 |              | COG0642 | T   |           | No  | No  |
| Pellet                           | 2005568200 | pfam00512 pfam02518                     | Signal transduction histidine kinase                                                                                                                             | 609 |              | COG0642 | T   |           | Yes | Yes |
| Pellet                           | 2005571300 | pfam00072 pfam00512 pfam02518           | Signal transduction histidine kinase                                                                                                                             | 460 |              | COG0642 | T   |           | No  | No  |
| Pellet                           | 2005607215 | pfam02518                               | Signal transduction histidine kinase                                                                                                                             | 254 |              | COG0642 | T   |           | No  | No  |
| Pellet                           | 2005629839 | pfam00512 pfam02518                     | Signal transduction histidine kinase                                                                                                                             | 272 |              | COG0642 | T   |           | No  | No  |
| Pellet / Supernatant             | 2005560217 | pfam00072 pfam02518                     | Signal transduction histidine kinase                                                                                                                             | 441 |              | COG0642 | T   |           | No  | No  |
| Pellet / Supernatant             | 2005563139 | pfam00072 pfam00512 pfam02518           | Signal transduction histidine kinase                                                                                                                             | 546 |              | COG0642 | T   |           | No  | No  |
| Soluble                          | 2005560714 | pfam00512 pfam02518 pfam02743           | Signal transduction histidine kinase                                                                                                                             | 463 |              | COG0642 | T   |           | Yes | Yes |
| Soluble                          | 2005582522 | pfam00512 pfam02518                     | Signal transduction histidine kinase                                                                                                                             | 376 |              | COG0642 | T   |           | No  | No  |
| Soluble                          | 2005589958 | pfam00512 pfam07695                     | Signal transduction histidine kinase                                                                                                                             | 516 |              | COG0642 | T   |           | No  | Yes |
| Supernatant                      | 2005574123 | pfam00072 pfam00512 pfam02518           | Signal transduction histidine kinase                                                                                                                             | 535 |              | COG0642 | T   |           | No  | No  |
| Supernatant                      | 2005578233 | pfam00497 pfam00512 pfam02518           | Signal transduction histidine kinase                                                                                                                             | 486 |              | COG0642 | T   |           | No  | Yes |
| Supernatant                      | 2005582280 | pfam00072 pfam00512 pfam02518           | Signal transduction histidine kinase                                                                                                                             | 555 |              | COG0642 | T   |           | Yes | Yes |
| Supernatant                      | 2005584770 | pfam00196                               | Similar to LuxR family transcriptional regulators                                                                                                                | 394 |              | COG2197 | T K |           | Yes | Yes |
| Global                           | 2005595783 | pfam10088                               | Similar to unknown protein                                                                                                                                       | 232 |              | COG5293 | S   |           | No  | No  |
| Pellet / Soluble                 | 2005630172 | pfam00436                               | Single-stranded DNA-binding protein                                                                                                                              | 159 |              | COG0629 | L   | TIGR00621 | No  | No  |
| Soluble                          | 2005599938 | pfam01336                               | Single-stranded DNA-binding protein                                                                                                                              | 145 |              | COG0629 | L   | TIGR00621 | No  | No  |
| Pellet                           | 2005606549 | pfam00145                               | Site-specific DNA methylase                                                                                                                                      | 247 |              | COG0270 | L   |           | No  | No  |
| Pellet                           | 2005610651 |                                         | Site-specific DNA methylase                                                                                                                                      | 297 |              |         |     |           | Yes | No  |
| Supernatant                      | 2005582844 | pfam00589                               | Site-specific recombinase, phage integrase family                                                                                                                | 389 |              | COG4974 | L   |           | No  | No  |
| Pellet                           | 2005623475 | pfam00924                               | Small-conductance mechanosensitive channel                                                                                                                       | 197 |              | COG0668 | M   |           | Yes | Yes |
| Pellet                           | 2005561073 | pfam01464 pfam01476                     | Soluble lytic murein transglycosylase and related regulatory proteins (some contain LysM/invasin domains)                                                        | 481 | EC:3.2.1.-   | COG1388 | M   |           | No  | No  |
| Pellet                           | 2005631021 | pfam01464                               | Soluble lytic murein transglycosylase and related regulatory proteins (some contain LysM/invasin domains)                                                        | 73  |              | COG0741 | M   |           | No  | No  |
| Pellet                           | 2005588072 | pfam00717 pfam01726                     | SOS-response transcriptional repressors (RecA-mediated autophosphorylation)                                                                                      | 235 | EC:3.4.21.88 | COG1974 | T K | TIGR00498 | No  | No  |
| Pellet                           | 2005602108 | pfam01547                               | Spermidine/putrescine-binding periplasmic protein                                                                                                                | 289 |              | COG0687 | E   |           | No  | No  |
| Supernatant                      | 2005617005 |                                         | Spermidine/putrescine-binding periplasmic protein                                                                                                                | 198 |              | COG0687 | E   |           | Yes | No  |
| Supernatant                      | 2005567955 | pfam00037                               | Succinate dehydrogenase/fumarate reductase, Fe-S protein subunit                                                                                                 | 261 | EC:1.3.99.1  | COG0479 | C   | TIGR00384 | No  | No  |
| Insoluble                        | 2005572723 | pfam00890 pfam02910                     | Succinate dehydrogenase/fumarate reductase, flavo protein subunit                                                                                                | 596 | EC:1.3.99.1  | COG1053 | C   | TIGR01811 | No  | No  |
| Pellet                           | 2005608824 | pfam00890                               | Succinate dehydrogenase/fumarate reductase, flavo protein subunit                                                                                                | 222 |              | COG1053 | C   |           | No  | No  |
| Supernatant / Insoluble / Global | 2005679954 | pfam02910                               | Succinate dehydrogenase/fumarate reductase, flavo protein subunit                                                                                                | 225 |              | COG1053 | C   |           | No  | No  |
| Pellet                           | 2005565089 | pfam00370 pfam02782                     | Sugar (pentulose and hexulose) kinases                                                                                                                           | 301 |              | COG1070 | G   |           | No  | No  |
| Pellet                           | 2005586735 | pfam00370 pfam02782                     | Sugar (pentulose and hexulose) kinases                                                                                                                           | 306 |              | COG1070 | G   |           | No  | No  |
| Soluble                          | 2005566624 | pfam00370                               | Sugar (pentulose and hexulose) kinases                                                                                                                           | 333 |              | COG1070 | G   |           | Yes | No  |
| Supernatant / Global             | 2005561658 | pfam00370 pfam02782                     | Sugar (pentulose and hexulose) kinases                                                                                                                           | 504 | EC:2.7.1.17  | COG1070 | G   | TIGR01312 | No  | No  |
| Insoluble / Global               | 2005621236 | pfam01547                               | Sugar ABC transporter sugar-binding protein                                                                                                                      | 249 |              | COG1653 | G   |           | No  | No  |
| Pellet                           | 2005561458 | pfam00294                               | Sugar kinases, ribokinase family                                                                                                                                 | 370 | EC:2.7.1.45  | COG0524 | G   |           | Yes | No  |
| Pellet                           | 2005605950 | pfam00294                               | Sugar kinases, ribokinase family                                                                                                                                 | 117 |              | COG0524 | G   |           | No  | No  |
| Pellet                           | 2005620645 | pfam00294                               | Sugar kinases, ribokinase family                                                                                                                                 | 65  |              | COG0524 | G   |           | No  | No  |
| Pellet / Soluble                 | 2005575090 | pfam00294                               | Sugar kinases, ribokinase family                                                                                                                                 | 193 |              | COG0524 | G   |           | No  | No  |
| Pellet / Supernatant             | 2005566122 | pfam00294                               | Sugar kinases, ribokinase family                                                                                                                                 | 374 | EC:2.7.1.45  | COG0524 | G   |           | Yes | No  |
| Soluble                          | 2005561461 | pfam00294                               | Sugar kinases, ribokinase family                                                                                                                                 | 370 | EC:2.7.1.45  | COG0524 | G   |           | Yes | No  |
| Pellet / Supernatant             | 2005627402 | pfam07582                               | Sugar phosphate isomerases/epimerases                                                                                                                            | 102 |              | COG1082 | G   |           | No  | No  |
| Supernatant                      | 2005623635 | pfam01261                               | Sugar phosphate isomerases/epimerases                                                                                                                            | 149 |              | COG1082 | G   |           | No  | No  |
| Global                           | 2005616652 | pfam00580                               | Superfamily I DNA and RNA helicases                                                                                                                              | 281 |              | COG0210 | L   |           | No  | No  |
| Pellet                           | 2005564162 | pfam00580                               | Superfamily I DNA and RNA helicases                                                                                                                              | 688 | EC:3.6.1.-   | COG0210 | L   |           | No  | No  |
| Pellet                           | 2005574577 |                                         | Superfamily I DNA and RNA helicases                                                                                                                              | 267 |              | COG0210 | L   |           | No  | No  |
| Soluble                          | 2005564157 | pfam00580                               | Superfamily I DNA and RNA helicases                                                                                                                              | 563 |              | COG0210 | L   |           | No  | No  |
| Global                           | 2005592904 | pfam00271 pfam00580                     | Superfamily II DNA helicase                                                                                                                                      | 761 |              | COG0514 | L   |           | No  | No  |
| Pellet                           | 2005621333 | pfam00570 pfam09382                     | Superfamily II DNA helicase                                                                                                                                      | 244 |              | COG0514 | L   |           | No  | No  |
| Supernatant                      | 2005590792 | pfam00271 pfam09382                     | Superfamily II DNA helicase                                                                                                                                      | 270 |              | COG0514 | L   |           | No  | No  |
| Supernatant                      | 2005596896 | pfam00570                               | Superfamily II DNA helicase                                                                                                                                      | 152 |              | COG0514 | L   |           | No  | No  |
| Pellet                           | 2005582028 | pfam00271                               | Superfamily II RNA helicase                                                                                                                                      | 450 |              | COG4581 | L   |           | No  | No  |
| Pellet                           | 2005576978 | pfam05681                               | Tartrate dehydratase alpha subunit/Fumarate hydratase class I, N-terminal domain                                                                                 | 198 |              | COG1951 | C   |           | No  | No  |
| Pellet                           | 2005610278 | pfam05681                               | Tartrate dehydratase alpha subunit/Fumarate hydratase class I, N-terminal domain                                                                                 | 210 |              | COG1951 | C   | TIGR00722 | No  | No  |
| Soluble                          | 2005560520 | pfam05681                               | Tartrate dehydratase alpha subunit/Fumarate hydratase class I, N-terminal domain                                                                                 | 129 |              | COG1951 | C   |           | No  | No  |
| Pellet                           | 2005588654 | pfam05683                               | Tartrate dehydratase beta subunit/Fumarate hydratase class I, C-terminal domain                                                                                  | 189 | EC:4.2.1.2   | COG1838 | C   | TIGR00723 | Yes | No  |
| Pellet                           | 2005617841 |                                         | Tlp pilus assembly protein, ATPase PilM                                                                                                                          | 274 |              | COG4972 | U N |           | No  | No  |
| Pellet                           | 2005562072 | pfam02775                               | Thiamine pyrophosphate-requiring enzymes [acetolactate synthase, pyruvate dehydrogenase (cytochrome), glyoxylate carboxylase, phosphoenolpyruvate decarboxylase] | 373 |              | COG4032 | R   | TIGR03297 | No  | No  |
| Pellet                           | 2005601437 | pfam00205 pfam02775                     | Thiamine pyrophosphate-requiring enzymes [acetolactate synthase, pyruvate dehydrogenase (cytochrome), glyoxylate carboxylase, phosphoenolpyruvate decarboxylase] | 294 |              | COG0028 | H E |           | No  | Yes |
| Pellet                           | 2005627741 | pfam00205 pfam02776                     | Thiamine pyrophosphate-requiring enzymes [acetolactate synthase, pyruvate dehydrogenase (cytochrome), glyoxylate carboxylase, phosphoenolpyruvate decarboxylase] | 236 |              | COG0028 | H E |           | No  | No  |
| Pellet / Supernatant             | 2005587097 | pfam00205 pfam02776                     | Thiamine pyrophosphate-requiring enzymes [acetolactate synthase, pyruvate dehydrogenase (cytochrome), glyoxylate carboxylase, phosphoenolpyruvate decarboxylase] | 292 |              | COG0028 | H E |           | No  | No  |
| Pellet                           | 2005624707 | pfam00085                               | Thiol-disulfide isomerase and thioredoxins                                                                                                                       | 67  |              | COG3118 | O   |           | No  | No  |
| Soluble                          | 2005560009 | pfam07992                               | Thioredoxin reductase                                                                                                                                            | 245 | EC:1.8.1.9   | COG0492 | O   | TIGR01292 | No  | No  |
| Soluble                          | 2005596043 | pfam07992                               | Thioredoxin reductase                                                                                                                                            | 262 | EC:1.8.1.9   | COG0492 | O   |           | Yes | No  |
| Soluble                          | 2005560776 | pfam01106                               | Thioredoxin-like proteins and domains                                                                                                                            | 74  |              | COG0694 | O   |           | No  | No  |
| Soluble                          | 2005577231 | pfam01106                               | Thioredoxin-like proteins and domains                                                                                                                            | 73  |              | COG0694 | O   |           | No  | No  |
| Soluble                          | 2005621087 | pfam00107                               | Threonine dehydrogenase and related Zn-dependent dehydrogenases                                                                                                  | 219 |              | COG1063 | R E |           | No  | No  |
| Soluble                          | 2005632325 | pfam00291                               | Threonine synthase                                                                                                                                               | 129 |              | COG0498 | E   |           | No  | No  |
| Pellet                           | 2005574152 | pfam00587 pfam03129 pfam07973           | Threonyl-tRNA synthetase                                                                                                                                         | 589 | EC:6.1.1.3   | COG0441 | J   | TIGR00418 | No  | No  |
| Soluble                          | 2005564688 |                                         | Threonyl-tRNA synthetase                                                                                                                                         | 335 |              | COG0441 | J   |           | No  | No  |
| Soluble                          | 2005576897 | pfam00587 pfam03129 pfam07973           | Threonyl-tRNA synthetase                                                                                                                                         | 523 | EC:6.1.1.3   | COG0441 | J   | TIGR00418 | No  | No  |
| Supernatant                      | 2005560068 | pfam00587 pfam03129 pfam07973           | Threonyl-tRNA synthetase                                                                                                                                         | 524 | EC:6.1.1.3   | COG0441 | J   | TIGR00418 | No  | No  |
| Soluble                          | 2005621510 |                                         | Thr2085 protein                                                                                                                                                  | 234 |              | COG4995 | S   |           | No  | No  |
| Soluble                          | 2005585134 |                                         | Topoisomerase IV, A subunit, putative                                                                                                                            | 123 |              |         |     |           | No  | No  |
| Pellet                           | 2005574658 |                                         | TPR domain protein                                                                                                                                               | 239 |              |         |     |           | No  | Yes |
| Insoluble                        | 2005591643 | pfam00467 pfam02357                     | Transcription antiterminator                                                                                                                                     | 187 |              | COG0250 | K   | TIGR00922 | No  | No  |
| Pellet                           | 2005563232 | pfam00467 pfam02357                     | Transcription antiterminator                                                                                                                                     | 181 |              | COG0250 | K   | TIGR00922 | No  | No  |
| Pellet                           | 2005563233 | pfam02357                               | Transcription antiterminator                                                                                                                                     | 94  |              | COG0250 | K   |           | No  | No  |
| Soluble                          | 2005571949 | pfam01272 pfam03449                     | Transcription elongation factor                                                                                                                                  | 156 |              | COG0782 | K   | TIGR01462 | No  | No  |
| Supernatant                      | 2005592910 | pfam01272 pfam03449                     | Transcription elongation factor                                                                                                                                  | 325 |              | COG0782 | K   | TIGR01462 | No  | No  |
| Global                           | 2005609881 | pfam00006 pfam07497                     | Transcription termination factor                                                                                                                                 | 289 |              | COG1158 | K   | TIGR00767 | No  | No  |
| Pellet                           | 2005616365 | pfam00006 pfam07497 pfam07498           | Transcription termination factor                                                                                                                                 | 274 |              | COG1158 | K   | TIGR00767 | No  | No  |
| Pellet                           | 2005619212 | pfam00006 pfam07497 pfam07498           | Transcription termination factor                                                                                                                                 | 257 |              | COG1158 | K   | TIGR00767 | No  | No  |
| Pellet                           | 2005631574 | pfam00006 pfam07497                     | Transcription termination factor                                                                                                                                 | 243 |              | COG1158 | K   | TIGR00767 | No  | No  |

|                                           |            |                                         |                                                                                                                                            |     |             |         |     |                     |     |     |
|-------------------------------------------|------------|-----------------------------------------|--------------------------------------------------------------------------------------------------------------------------------------------|-----|-------------|---------|-----|---------------------|-----|-----|
| Global                                    | 2005570387 | pfam00575                               | Transcriptional accessory protein                                                                                                          | 378 |             | COG2183 | K   |                     | No  | No  |
| Supernatant                               | 2005576552 |                                         | Transcriptional accessory protein                                                                                                          | 427 |             | COG2183 | K   |                     | No  | No  |
| Soluble                                   | 2005573381 | pfam00480                               | Transcriptional regulator/sugar kinase                                                                                                     | 323 | EC:2.7.1.2  | COG1940 | K G | TIGR00744           | No  | No  |
| Soluble                                   | 2005576442 | pfam00480                               | Transcriptional regulator/sugar kinase                                                                                                     | 163 |             | COG1940 | K G |                     | No  | No  |
| Soluble                                   | 2005569278 |                                         | Transcriptional regulators containing a DNA-binding HTH domain and an aminotransferase domain (MocR family) and their eukaryotic orthologs | 155 |             | COG1167 | E K |                     | No  | No  |
| Soluble                                   | 2005571165 |                                         | Transcriptional regulators containing a DNA-binding HTH domain and an aminotransferase domain (MocR family) and their eukaryotic orthologs | 234 |             | COG1167 | K E |                     | No  | No  |
| Pellet                                    | 2005570038 |                                         | Transcriptional regulators, similar to M. xanthus CarD                                                                                     | 90  |             | COG1329 | K   |                     | No  | No  |
| Pellet                                    | 2005563872 | pfam00270 pfam02559                     | Transcription-repair coupling factor (superfamily II helicase)                                                                             | 831 |             | COG1197 | K L | TIGR00580           | No  | No  |
| Global                                    | 2005600763 | pfam00456                               | Transketolase                                                                                                                              | 290 |             | COG0021 | G   |                     | No  | No  |
| Pellet / Supernatant                      | 2005563813 | pfam00456 pfam02779                     | Transketolase                                                                                                                              | 339 |             | COG0021 | G   |                     | No  | No  |
| Soluble                                   | 2005571092 | pfam00456 pfam02779 pfam02780           | Transketolase                                                                                                                              | 657 | EC:2.2.1.1  | COG0021 | G   | TIGR00232           | No  | Yes |
| Soluble                                   | 2005569401 | pfam02779 pfam02780                     | Transketolase, C-terminal subunit                                                                                                          | 312 | EC:2.2.1.1  | COG3958 | G   |                     | No  | No  |
| Soluble                                   | 2005591550 | pfam02779 pfam02780                     | Transketolase, C-terminal subunit                                                                                                          | 260 | EC:2.2.1.1  | COG3958 | G   |                     | No  | No  |
| Soluble / Supernatant                     | 2005570934 | pfam02779                               | Transketolase, C-terminal subunit                                                                                                          | 163 |             | COG3958 | G   |                     | No  | No  |
| Soluble                                   | 2005567989 | pfam00456                               | Transketolase, N-terminal subunit                                                                                                          | 223 | EC:2.2.1.1  | COG3959 | G   |                     | No  | No  |
| Soluble                                   | 2005570933 | pfam00456                               | Transketolase, N-terminal subunit                                                                                                          | 223 | EC:2.2.1.1  | COG3959 | G   |                     | No  | No  |
| Pellet / Supernatant / Soluble            | 2005567316 | pfam01132 pfam08207 pfam09285           | Translation elongation factor P (EF-P)/translation initiation factor 5A (eIF-5A)                                                           | 187 | EC:3.6.5.3  | COG0231 | J   | TIGR00038           | No  | No  |
| Soluble                                   | 2005576790 | pfam09285                               | Translation elongation factor P (EF-P)/translation initiation factor 5A (eIF-5A)                                                           | 54  |             |         |     |                     | No  | No  |
| Pellet                                    | 2005587362 | pfam00889                               | Translation elongation factor Ts                                                                                                           | 157 |             | COG0264 | J   |                     | No  | No  |
| Pellet                                    | 2005587363 | pfam00627 pfam00889                     | Translation elongation factor Ts                                                                                                           | 106 |             | COG0264 | J   |                     | No  | No  |
| Pellet                                    | 2005599017 | pfam00627 pfam00889                     | Translation elongation factor Ts                                                                                                           | 235 | EC:3.6.5.3  | COG0264 | J   | TIGR00116           | No  | No  |
| Pellet / Soluble                          | 2005588066 | pfam00627 pfam00889                     | Translation elongation factor Ts                                                                                                           | 250 |             | COG0264 | J   | TIGR00116           | No  | No  |
| Global                                    | 2005564108 | pfam00009 pfam00679 pfam03144 pfam03764 | Translation elongation factors (GTPases)                                                                                                   | 554 | EC:3.6.5.3  | COG0480 | J   | TIGR00484           | No  | No  |
| Pellet                                    | 2005564730 | pfam00679 pfam03144 pfam03764           | Translation elongation factors (GTPases)                                                                                                   | 410 |             | COG0480 | J   | TIGR00484           | No  | No  |
| Pellet                                    | 2005566246 | pfam00009                               | Translation elongation factors (GTPases)                                                                                                   | 293 |             | COG0480 | J   | TIGR00231           | No  | No  |
| Pellet                                    | 2005599228 | pfam00009 pfam03144                     | Translation elongation factors (GTPases)                                                                                                   | 292 |             | COG0480 | J   |                     | No  | No  |
| Pellet                                    | 2005631445 | pfam00009                               | Translation elongation factors (GTPases)                                                                                                   | 265 |             | COG0480 | J   |                     | No  | No  |
| Pellet / Soluble / Global                 | 2005620367 | pfam00009                               | Translation elongation factors (GTPases)                                                                                                   | 279 |             | COG0480 | J   | TIGR00231           | No  | No  |
| Pellet / Soluble / Supernatant            | 2005601556 | pfam00009                               | Translation elongation factors (GTPases)                                                                                                   | 261 |             | COG0480 | J   |                     | No  | No  |
| Pellet / Supernatant / Global             | 2005625690 | pfam00679 pfam03764                     | Translation elongation factors (GTPases)                                                                                                   | 273 |             | COG0480 | J   |                     | No  | No  |
| Soluble                                   | 2005566646 | pfam00009                               | Translation elongation factors (GTPases)                                                                                                   | 401 |             | COG0480 | J   | TIGR00231           | No  | No  |
| Soluble                                   | 2005572183 | pfam00009 pfam03144 pfam03764           | Translation elongation factors (GTPases)                                                                                                   | 393 |             | COG0480 | J   |                     | No  | No  |
| Soluble                                   | 2005583272 | pfam00679 pfam03764                     | Translation elongation factors (GTPases)                                                                                                   | 331 |             | COG0480 | J   |                     | No  | No  |
| Soluble                                   | 2005585985 | pfam00009                               | Translation elongation factors (GTPases)                                                                                                   | 292 |             | COG0480 | J   | TIGR00231           | No  | No  |
| Soluble                                   | 2005597320 | pfam00009                               | Translation elongation factors (GTPases)                                                                                                   | 267 |             | COG0480 | J   | TIGR00231           | Yes | No  |
| Soluble                                   | 2005609194 | pfam00009 pfam03144                     | Translation elongation factors (GTPases)                                                                                                   | 288 |             | COG0480 | J   |                     | No  | No  |
| Soluble                                   | 2005609608 | pfam00009 pfam03144                     | Translation elongation factors (GTPases)                                                                                                   | 261 |             | COG0480 | J   |                     | No  | No  |
| Soluble / Supernatant                     | 2005601230 | pfam00679 pfam03764                     | Translation elongation factors (GTPases)                                                                                                   | 280 |             | COG0480 | J   |                     | No  | No  |
| Supernatant                               | 2005565619 | pfam00679 pfam03764                     | Translation elongation factors (GTPases)                                                                                                   | 199 |             | COG0480 | J   |                     | No  | No  |
| Supernatant                               | 2005566039 | pfam00679 pfam03764                     | Translation elongation factors (GTPases)                                                                                                   | 147 |             | COG0480 | J   |                     | No  | No  |
| Supernatant                               | 2005566648 | pfam00679 pfam03764                     | Translation elongation factors (GTPases)                                                                                                   | 158 |             | COG0480 | J   |                     | No  | No  |
| Supernatant                               | 2005571199 | pfam00679 pfam03764                     | Translation elongation factors (GTPases)                                                                                                   | 253 |             | COG0480 | J   |                     | No  | No  |
| Supernatant                               | 2005589758 | pfam00009 pfam00679 pfam03144 pfam03764 | Translation elongation factors (GTPases)                                                                                                   | 596 | EC:3.6.5.3  | COG0480 | J   | TIGR00484           | Yes | No  |
| Supernatant                               | 2005592411 | pfam00009 pfam03144 pfam03764           | Translation elongation factors (GTPases)                                                                                                   | 453 |             | COG0480 | J   | TIGR00484           | Yes | No  |
| Pellet                                    | 2005574597 | pfam01176                               | Translation initiation factor 1 (IF-1)                                                                                                     | 64  |             | COG0361 | J   | TIGR00008           | No  | No  |
| Pellet                                    | 2005627538 | pfam01176                               | Translation initiation factor 1 (IF-1)                                                                                                     | 72  | EC:3.6.5.3  | COG0361 | J   | TIGR00008           | No  | No  |
| Pellet                                    | 2005565368 | pfam00009 pfam03144 pfam04760           | Translation initiation factor 2 (IF-2; GTPase)                                                                                             | 751 | EC:3.6.5.3  | COG0532 | J   | TIGR00231 TIGR00487 | Yes | No  |
| Pellet                                    | 2005587746 | pfam00707                               | Translation initiation factor 3 (IF-3)                                                                                                     | 82  |             | COG0290 | J   |                     | No  | No  |
| Soluble                                   | 2005612111 | pfam01609                               | Transposase                                                                                                                                | 271 |             | COG5433 | L   |                     | No  | No  |
| Pellet                                    | 200560028  |                                         | Transposase and inactivated derivatives                                                                                                    | 149 |             |         |     |                     | No  | No  |
| Pellet                                    | 2005562046 | pfam00665                               | Transposase and inactivated derivatives                                                                                                    | 430 |             | COG4584 | L   |                     | No  | No  |
| Pellet                                    | 2005596813 | pfam01527                               | Transposase and inactivated derivatives                                                                                                    | 102 |             | COG2963 | L   |                     | No  | No  |
| Pellet                                    | 2005603066 | pfam00665                               | Transposase and inactivated derivatives                                                                                                    | 234 |             | COG2801 | L   |                     | No  | No  |
| Soluble                                   | 2005603357 | pfam03050                               | Transposase and inactivated derivatives                                                                                                    | 220 |             | COG3436 | L   |                     | No  | No  |
| Supernatant                               | 2005569797 | pfam00665                               | Transposase and inactivated derivatives                                                                                                    | 273 |             | COG4584 | L   |                     | No  | No  |
| Supernatant                               | 2005593482 | pfam00665                               | Transposase and inactivated derivatives                                                                                                    | 514 |             | COG4584 | L   |                     | No  | No  |
| Global                                    | 2005586141 | pfam06808                               | TRAP-type C4-dicarboxylate transport system, large permease component                                                                      | 256 |             | COG1593 | G   |                     | Yes | Yes |
| Soluble                                   | 2005600823 | pfam06808                               | TRAP-type C4-dicarboxylate transport system, large permease component                                                                      | 239 |             | COG1593 | G   |                     | Yes | Yes |
| Pellet                                    | 2005604802 | pfam03480                               | TRAP-type C4-dicarboxylate transport system, periplasmic component                                                                         | 190 |             | COG1638 | G   |                     | Yes | No  |
| Soluble                                   | 2005631644 | pfam03480                               | TRAP-type C4-dicarboxylate transport system, periplasmic component                                                                         | 186 |             | COG1638 | G   |                     | No  | No  |
| Global / Insoluble / Pellet               | 2005592036 |                                         | TRAP-type uncharacterized transport system, periplasmic component                                                                          | 140 |             | COG2358 | R   |                     | No  | No  |
| Soluble                                   | 2005622948 |                                         | TRAP-type uncharacterized transport system, periplasmic component                                                                          | 98  |             | COG2358 | R   |                     | No  | No  |
| Soluble                                   | 2005595636 | pfam06283                               | Trehalose utilization protein                                                                                                              | 169 |             | COG4813 | G   |                     | No  | No  |
| Global                                    | 2005574181 | pfam00121                               | Triosephosphate isomerase                                                                                                                  | 250 | EC:5.3.1.1  | COG0149 | G   | TIGR00419           | No  | No  |
| Global                                    | 2005633132 | pfam00121                               | Triosephosphate isomerase                                                                                                                  | 147 |             | COG0149 | G   |                     | No  | No  |
| Global / Pellet / Supernatant             | 2005603326 | pfam00121                               | Triosephosphate isomerase                                                                                                                  | 64  |             | COG0149 | G   |                     | No  | No  |
| Global / Soluble / Supernatant            | 2005574477 | pfam00121                               | Triosephosphate isomerase                                                                                                                  | 251 | EC:5.3.1.1  | COG0149 | G   | TIGR00419           | No  | No  |
| Global / Supernatant                      | 2005571011 | pfam00121                               | Triosephosphate isomerase                                                                                                                  | 101 |             | COG0149 | G   |                     | No  | No  |
| Pellet / Soluble                          | 2005606214 | pfam00121                               | Triosephosphate isomerase                                                                                                                  | 238 | EC:5.3.1.1  | COG0149 | G   | TIGR00419           | No  | No  |
| Soluble                                   | 2005562421 | pfam00121                               | Triosephosphate isomerase                                                                                                                  | 163 |             | COG0149 | G   | TIGR00419           | No  | No  |
| Soluble                                   | 2005568700 | pfam00121                               | Triosephosphate isomerase                                                                                                                  | 230 | EC:5.3.1.1  | COG0149 | G   | TIGR00419           | No  | No  |
| Soluble                                   | 2005577883 | pfam00121                               | Triosephosphate isomerase                                                                                                                  | 212 | EC:5.3.1.1  | COG0149 | G   | TIGR00419           | No  | No  |
| Soluble                                   | 2005598336 | pfam00121                               | Triosephosphate isomerase                                                                                                                  | 188 | EC:5.3.1.1  | COG0149 | G   | TIGR00419           | No  | No  |
| Soluble                                   | 2005622185 | pfam00121                               | Triosephosphate isomerase                                                                                                                  | 219 | EC:5.3.1.1  | COG0149 | G   | TIGR00419           | No  | No  |
| Supernatant                               | 2005632088 | pfam00121                               | Triosephosphate isomerase                                                                                                                  | 166 |             | COG0149 | G   | TIGR00419           | No  | No  |
| Supernatant / Soluble                     | 2005611461 | pfam00121                               | Triosephosphate isomerase                                                                                                                  | 249 | EC:5.3.1.1  | COG0149 | G   | TIGR00419           | No  | No  |
| Pellet                                    | 2005565912 | pfam02386                               | Trk-type K <sup>+</sup> transport systems, membrane component s                                                                            | 315 |             | COG0168 | P   |                     | Yes | Yes |
| Soluble                                   | 2005623768 | pfam01746                               | tRNA-(guanine-N1)-methyltransferase                                                                                                        | 219 | EC:2.1.1.31 | COG0336 | J   | TIGR00088           | Yes | No  |
| Global                                    | 2005577218 | pfam01207                               | tRNA-dihydrouridine synthase                                                                                                               | 321 |             | COG0042 | J   |                     | No  | No  |
| Pellet                                    | 2005626164 | pfam01207                               | tRNA-dihydrouridine synthase                                                                                                               | 158 |             | COG0042 | J   | TIGR00742           | No  | No  |
| Insoluble / Pellet                        | 2005583442 | pfam00089 pfam00595                     | Trypsin-like serine proteases, typically periplasmic, contain C-terminal PDZ domain                                                        | 402 | EC:3.4.21.- | COG0265 | O   | TIGR02037           | Yes | Yes |
| Pellet / Supernatant / Insoluble / Global | 2005569333 | pfam00089                               | Trypsin-like serine proteases, typically periplasmic, contain C-terminal PDZ domain                                                        | 227 |             | COG0265 | O   |                     | No  | No  |
| Supernatant                               | 2005613254 | pfam00089                               | Trypsin-like serine proteases, typically periplasmic, contain C-terminal PDZ domain                                                        | 241 |             | COG0265 | O   |                     | Yes | Yes |
| Insoluble                                 | 2005598145 | pfam00290                               | Tryptophan synthase alpha chain                                                                                                            | 201 | EC:4.2.1.20 | COG0159 | E   | TIGR00262           | No  | No  |
| Pellet                                    | 2005577791 | pfam00290                               | Tryptophan synthase alpha chain                                                                                                            | 268 | EC:4.2.1.20 | COG0159 | E   | TIGR00262           | Yes | No  |
| Pellet                                    | 2005577787 | pfam00291                               | Tryptophan synthase beta chain                                                                                                             | 422 | EC:4.2.1.20 | COG0133 | E   | TIGR00263           | No  | No  |
| Pellet                                    | 2005591114 | pfam01212                               | Tryptophanase                                                                                                                              | 283 |             | COG3033 | E   |                     | No  | No  |

|                                  |            |                                         |                                                                                      |     |             |         |     |           |     |     |
|----------------------------------|------------|-----------------------------------------|--------------------------------------------------------------------------------------|-----|-------------|---------|-----|-----------|-----|-----|
| Soluble                          | 2005584052 | pfam01212                               | Tryptophanase                                                                        | 351 |             | COG3033 | E   |           | No  | No  |
| Soluble                          | 2005606560 | pfam01212                               | Tryptophanase                                                                        | 271 |             | COG3033 | E   |           | No  | No  |
| Supernatant                      | 2005591115 | pfam01212                               | Tryptophanase                                                                        | 127 |             | COG3033 | E   |           | No  | No  |
| Soluble                          | 200562140  |                                         | Tryptophanyl-tRNA synthetase                                                         | 109 |             | COG0180 | J   |           | No  | No  |
| Supernatant                      | 2005620108 | pfam02384                               | Type I restriction-modification system methyltransferase subunit                     | 264 |             | COG0286 | V   |           | No  | No  |
| Pellet / Supernatant             | 2005601360 | pfam00437                               | Type II secretory pathway, ATPase PulE/Tip pilus assembly pathway, ATPase PilB       | 219 |             | COG2804 | N U |           | No  | No  |
| Pellet                           | 2005571039 | pfam03958                               | Type II secretory pathway, component HofQ                                            | 286 |             | COG4796 | U   |           | Yes | No  |
| Pellet                           | 2005571618 | pfam00128 pfam02922                     | Type II secretory pathway, pullulanase PulA and related glycosidases                 | 720 | EC:3.2.1.-  | COG1523 | G   | TIGR02100 | No  | No  |
| Pellet                           | 2005565839 | pfam00521                               | Type IIA topoisomerase (DNA gyrase/topo II, topoisomerase IV), A subunit             | 367 |             | COG0188 | L   |           | No  | No  |
| Pellet                           | 2005572536 | pfam00521                               | Type IIA topoisomerase (DNA gyrase/topo II, topoisomerase IV), A subunit             | 272 |             | COG0188 | L   |           | No  | No  |
| Pellet                           | 2005572537 | pfam00521                               | Type IIA topoisomerase (DNA gyrase/topo II, topoisomerase IV), A subunit             | 590 |             | COG0188 | L   |           | No  | No  |
| Pellet                           | 2005573913 | pfam00521                               | Type IIA topoisomerase (DNA gyrase/topo II, topoisomerase IV), A subunit             | 182 |             | COG0188 | L   |           | No  | No  |
| Pellet                           | 2005574305 | pfam00521                               | Type IIA topoisomerase (DNA gyrase/topo II, topoisomerase IV), A subunit             | 345 |             | COG0188 | L   |           | No  | No  |
| Pellet                           | 2005580391 | pfam00521 pfam03989                     | Type IIA topoisomerase (DNA gyrase/topo II, topoisomerase IV), A subunit             | 646 |             | COG0188 | L   |           | No  | No  |
| Pellet                           | 2005580812 | pfam00521                               | Type IIA topoisomerase (DNA gyrase/topo II, topoisomerase IV), A subunit             | 468 |             | COG0188 | L   |           | No  | No  |
| Insoluble                        | 2005560493 | pfam00204 pfam01751                     | Type IIA topoisomerase (DNA gyrase/topo II, topoisomerase IV), B subunit             | 256 |             | COG0187 | L   |           | No  | No  |
| Pellet                           | 200560421  | pfam00204                               | Type IIA topoisomerase (DNA gyrase/topo II, topoisomerase IV), B subunit             | 325 |             | COG0187 | L   |           | No  | No  |
| Supernatant                      | 2005568539 | pfam00204 pfam02518                     | Type IIA topoisomerase (DNA gyrase/topo II, topoisomerase IV), B subunit             | 445 |             | COG0187 | L   |           | No  | No  |
| Pellet                           | 2005582498 | pfam02534                               | Type IV secretory pathway, VirD4 components                                          | 550 |             | COG3505 | U   |           | No  | No  |
| Soluble                          | 2005566853 | pfam01370                               | UDP-glucose 4-epimerase                                                              | 212 |             | COG1087 | M   |           | No  | No  |
| Soluble                          | 2005567614 | pfam01370                               | UDP-glucose 4-epimerase                                                              | 338 | EC:5.1.3.2  | COG1087 | M   | TIGR01179 | No  | No  |
| Soluble                          | 2005569659 | pfam02873                               | UDP-N-acetylmuramate dehydrogenase                                                   | 209 |             | COG0812 | M   | TIGR00179 | Yes | No  |
| Supernatant                      | 2005566456 | pfam02875                               | UDP-N-acetylmuramoylalanine-D-glutamate ligase                                       | 188 |             | COG0771 | M   |           | No  | No  |
| Pellet                           | 2005631312 | pfam02875 pfam08245                     | UDP-N-acetylmuramyl tripeptide synthase                                              | 278 |             | COG0769 | M   | TIGR01085 | No  | No  |
| Global                           | 2005561492 | pfam02608                               | Uncharacterized ABC-type transport system, periplasmic component/surface lipoprotein | 298 |             | COG1744 | R   |           | No  | No  |
| Global                           | 2005613387 | pfam02608                               | Uncharacterized ABC-type transport system, periplasmic component/surface lipoprotein | 194 |             | COG1744 | R   |           | No  | No  |
| Insoluble / Pellet / Supernatant | 2005616228 | pfam02608                               | Uncharacterized ABC-type transport system, periplasmic component/surface lipoprotein | 244 |             | COG1744 | R   |           | No  | No  |
| Pellet                           | 2005585462 | pfam02608                               | Uncharacterized ABC-type transport system, periplasmic component/surface lipoprotein | 148 |             | COG1744 | R   |           | Yes | No  |
| Pellet / Soluble                 | 2005591193 | pfam02608                               | Uncharacterized ABC-type transport system, periplasmic component/surface lipoprotein | 367 |             | COG1744 | R   |           | Yes | No  |
| Pellet / Supernatant             | 2005613438 | pfam02608                               | Uncharacterized ABC-type transport system, periplasmic component/surface lipoprotein | 194 |             | COG1744 | R   |           | Yes | No  |
| Supernatant                      | 2005586456 | pfam02608                               | Uncharacterized ABC-type transport system, periplasmic component/surface lipoprotein | 332 |             | COG1744 | R   |           | No  | No  |
| Pellet                           | 2005560213 | pfam00037 pfam00111 pfam02906 pfam10588 | Uncharacterized anaerobic dehydrogenase                                              | 348 |             | COG3383 | R   |           | No  | No  |
| Pellet / Soluble                 | 2005573023 | pfam00037 pfam00111 pfam02906 pfam10588 | Uncharacterized anaerobic dehydrogenase                                              | 321 |             | COG3383 | R   |           | Yes | No  |
| Pellet / Supernatant             | 2005580143 | pfam00037 pfam00111 pfam02906 pfam10588 | Uncharacterized anaerobic dehydrogenase                                              | 268 |             | COG3383 | R   |           | No  | No  |
| Global                           | 2005574714 | pfam02588 pfam10035                     | Uncharacterized conserved protein                                                    | 290 |             | COG1284 | S   |           | Yes | Yes |
| Global                           | 2005589190 |                                         | Uncharacterized conserved protein                                                    | 403 |             | COG3875 | S   |           | No  | No  |
| Insoluble                        | 2005563916 | pfam06250                               | Uncharacterized conserved protein                                                    | 183 |             | COG4804 | S   |           | No  | No  |
| Pellet                           | 2005562280 |                                         | Uncharacterized conserved protein                                                    | 375 |             | COG5316 | S   |           | No  | No  |
| Pellet                           | 2005564553 | pfam01709                               | Uncharacterized conserved protein                                                    | 248 | EC:2.7.7.27 | COG0217 | S   | TIGR01033 | No  | No  |
| Pellet                           | 2005571513 | pfam03976                               | Uncharacterized conserved protein                                                    | 269 |             | COG2326 | S   |           | No  | No  |
| Pellet                           | 2005581541 | pfam03781                               | Uncharacterized conserved protein                                                    | 481 |             | COG1262 | S   |           | No  | Yes |
| Pellet                           | 2005585629 | pfam01936                               | Uncharacterized conserved protein                                                    | 258 |             | COG1432 | S   |           | No  | No  |
| Pellet                           | 2005589392 | pfam06245                               | Uncharacterized conserved protein                                                    | 224 |             | COG4198 | S   |           | No  | No  |
| Pellet                           | 2005589435 | pfam01709                               | Uncharacterized conserved protein                                                    | 246 | EC:2.7.7.27 | COG0217 | S   | TIGR01033 | No  | No  |
| Pellet                           | 2005603008 | pfam03781                               | Uncharacterized conserved protein                                                    | 266 |             | COG1262 | S   |           | No  | No  |
| Pellet                           | 2005623490 | pfam06250                               | Uncharacterized conserved protein                                                    | 201 |             | COG4804 | S   |           | No  | No  |
| Pellet / Global                  | 2005616043 | pfam01709                               | Uncharacterized conserved protein                                                    | 240 | EC:2.7.7.27 | COG0217 | S   | TIGR01033 | No  | No  |
| Pellet / Supernatant             | 2005580400 | pfam01436                               | Uncharacterized conserved protein                                                    | 310 |             | COG3391 | S   |           | No  | No  |
| Soluble                          | 2005563390 | pfam04169 pfam04174                     | Uncharacterized conserved protein                                                    | 438 |             | COG2308 | S   |           | No  | No  |
| Soluble                          | 2005565699 |                                         | Uncharacterized conserved protein                                                    | 411 |             | COG3391 | S   | TIGR02276 | Yes | No  |
| Soluble                          | 2005579732 | pfam09861                               | Uncharacterized conserved protein                                                    | 453 |             | COG3875 | S   |           | No  | No  |
| Soluble                          | 2005587316 | pfam01243                               | Uncharacterized conserved protein                                                    | 131 |             | COG5015 | S   |           | No  | No  |
| Soluble                          | 2005621377 | pfam01243                               | Uncharacterized conserved protein                                                    | 130 |             | COG5015 | S   |           | No  | No  |
| Soluble                          | 2005629679 | pfam06245                               | Uncharacterized conserved protein                                                    | 255 |             | COG4198 | S   |           | No  | No  |
| Soluble / Supernatant            | 2005571006 | pfam06245                               | Uncharacterized conserved protein                                                    | 438 |             | COG4198 | S   |           | No  | No  |
| Supernatant                      | 2005562716 | pfam04169 pfam04174                     | Uncharacterized conserved protein                                                    | 249 |             | COG2308 | S   |           | No  | No  |
| Supernatant                      | 2005571550 | pfam08495 pfam10442                     | Uncharacterized conserved protein                                                    | 379 |             | COG3287 | S   |           | No  | No  |
| Supernatant                      | 2005584791 | pfam01709                               | Uncharacterized conserved protein                                                    | 246 | EC:2.7.7.27 | COG0217 | S   | TIGR01033 | No  | No  |
| Supernatant                      | 2005586727 | pfam08495 pfam10442                     | Uncharacterized conserved protein                                                    | 392 |             | COG3287 | S   |           | No  | No  |
| Supernatant                      | 2005601583 | pfam01709                               | Uncharacterized conserved protein                                                    | 70  |             | COG0217 | S   |           | No  | No  |
| Supernatant                      | 2005620802 |                                         | Uncharacterized conserved protein                                                    | 217 |             | COG5316 | S   |           | Yes | No  |
| Soluble                          | 2005624171 | pfam07883                               | Uncharacterized conserved protein, contains double-stranded beta-helix domain        | 124 |             | COG1917 | S   |           | No  | No  |
| Pellet / Supernatant             | 2005560643 | pfam00258 pfam00301 pfam00753 pfam01613 | Uncharacterized flavoproteins                                                        | 616 |             | COG0426 | C   |           | No  | No  |
| Soluble                          | 2005563288 | pfam00301 pfam00753 pfam01613           | Uncharacterized flavoproteins                                                        | 616 |             | COG0426 | C   |           | No  | No  |
| Supernatant                      | 2005568601 | pfam00753                               | Uncharacterized flavoproteins                                                        | 291 |             | COG0426 | C   |           | No  | No  |
| Supernatant                      | 2005577868 | pfam01963                               | Uncharacterized homolog of PrgY (pheromone shut-off protein)                         | 327 |             | COG1916 | S   | TIGR00261 | Yes | Yes |
| Pellet                           | 2005594749 | pfam00805                               | Uncharacterized low-complexity proteins                                              | 230 |             | COG1357 | S   |           | No  | No  |
| Pellet                           | 2005614846 | pfam00805                               | Uncharacterized low-complexity proteins                                              | 254 |             | COG1357 | S   |           | No  | No  |
| Pellet                           | 2005616844 | pfam00805                               | Uncharacterized low-complexity proteins                                              | 271 |             | COG1357 | S   |           | No  | Yes |
| Soluble                          | 2005568496 | pfam02308                               | Uncharacterized membrane protein                                                     | 227 | EC:3.6.1.-  | COG1285 | S   |           | Yes | Yes |
| Global                           | 2005572854 | pfam00111                               | Uncharacterized metal-binding protein                                                | 484 |             | COG3894 | R   |           | No  | No  |
| Supernatant                      | 2005572386 |                                         | Uncharacterized metal-binding protein                                                | 413 |             | COG3894 | R   |           | No  | No  |
| Global                           | 2005565842 | pfam07992                               | Uncharacterized NAD(FAD)-dependent dehydrogenases                                    | 413 |             | COG1251 | C   |           | No  | No  |
| Supernatant                      | 2005577106 | pfam07992                               | Uncharacterized NAD(FAD)-dependent dehydrogenases                                    | 402 | EC:1.5.3.1  | COG0493 | R E |           | No  | No  |
| Pellet                           | 2005580626 |                                         | Uncharacterized N-terminal domain of the transcription elongation factor GreA        | 414 |             | COG1747 | S   |           | No  | No  |
| Pellet                           | 2005612363 |                                         | Uncharacterized N-terminal domain of the transcription elongation factor GreA        | 278 |             | COG1747 | S   |           | No  | No  |
| Soluble                          | 2005572962 | pfam00465                               | Uncharacterized oxidoreductases, Fe-dependent alcohol dehydrogenase family           | 327 |             | COG1979 | C   |           | No  | No  |
| Soluble                          | 2005628587 |                                         | Uncharacterized oxidoreductases, Fe-dependent alcohol dehydrogenase family           | 203 |             | COG1979 | C   |           | No  | No  |
| Global                           | 2005579727 | pfam07944                               | Uncharacterized protein conserved in bacteria                                        | 469 |             | COG3533 | S   |           | No  | No  |
| Pellet                           | 2005561392 |                                         | Uncharacterized protein conserved in bacteria                                        | 271 |             | COG1729 | S   |           | Yes | No  |
| Pellet                           | 2005572490 |                                         | Uncharacterized protein conserved in bacteria                                        | 328 |             | COG4864 | S   |           | Yes | Yes |
| Pellet                           | 2005574488 | pfam05947                               | Uncharacterized protein conserved in bacteria                                        | 572 |             | COG3519 | S   | TIGR03359 | No  | No  |
| Pellet                           | 2005575157 | pfam07661                               | Uncharacterized protein conserved in bacteria                                        | 303 |             | COG2849 | S   |           | No  | No  |
| Pellet                           | 2005583534 | pfam02646                               | Uncharacterized protein conserved in bacteria                                        | 336 |             | COG1322 | S   |           | Yes | Yes |
| Pellet                           | 2005585640 | pfam02645                               | Uncharacterized protein conserved in bacteria                                        | 287 |             | COG1307 | S   | TIGR00762 | No  | No  |
| Pellet                           | 2005591803 | pfam02677                               | Uncharacterized protein conserved in bacteria                                        | 165 |             | COG1636 | S   |           | No  | No  |
| Pellet                           | 2005602731 | pfam02575                               | Uncharacterized protein conserved in bacteria                                        | 104 |             | COG0718 | S   | TIGR00103 | No  | No  |



|                                |            |                     |                                                                                |     |             |         |    |                     |     |     |
|--------------------------------|------------|---------------------|--------------------------------------------------------------------------------|-----|-------------|---------|----|---------------------|-----|-----|
| Pellet                         | 2005613318 | pfam01145           | Uncharacterized protein conserved in bacteria                                  | 259 |             | COG4864 | S  |                     | Yes | Yes |
| Pellet / Supernatant           | 2005632552 |                     | Uncharacterized protein conserved in bacteria                                  | 152 |             | COG4864 | S  |                     | No  | No  |
| Pellet / Supernatant / Global  | 200563565  |                     | Uncharacterized protein conserved in bacteria                                  | 429 |             | COG4676 | S  |                     | No  | No  |
| Soluble                        | 200561898  |                     | Uncharacterized protein conserved in bacteria                                  | 306 |             | COG1692 | S  | TIGR00282           | No  | No  |
| Soluble                        | 2005588244 | pfam09986           | Uncharacterized protein conserved in bacteria                                  | 172 |             | COG1655 | S  |                     | No  | No  |
| Soluble                        | 2005589264 | pfam07075           | Uncharacterized protein conserved in bacteria                                  | 376 |             | COG3876 | S  |                     | No  | No  |
| Soluble                        | 2005591676 |                     | Uncharacterized protein conserved in bacteria                                  | 871 |             | COG4913 | S  |                     | No  | No  |
| Soluble                        | 2005591735 | pfam02493           | Uncharacterized protein conserved in bacteria                                  | 96  |             | COG4642 | S  |                     | No  | No  |
| Supernatant                    | 2005566111 | pfam02639           | Uncharacterized protein conserved in bacteria                                  | 103 |             | COG1671 | S  |                     | No  | No  |
| Supernatant                    | 2005577869 | pfam02646           | Uncharacterized protein conserved in bacteria                                  | 365 |             | COG1322 | S  |                     | Yes | Yes |
| Supernatant                    | 2005601013 | pfam09979           | Uncharacterized protein conserved in bacteria                                  | 245 |             | COG3566 | S  |                     | No  | No  |
| Supernatant                    | 2005612205 |                     | Uncharacterized protein conserved in bacteria                                  | 268 |             | COG2989 | S  |                     | No  | No  |
| Supernatant / Global           | 2005563564 |                     | Uncharacterized protein conserved in bacteria                                  | 970 |             | COG4676 | S  | TIGR01352           | No  | No  |
| Soluble                        | 2005591178 | pfam00092           | Uncharacterized protein containing a von Willebrand factor type A (vWA) domain | 171 |             |         |    |                     | No  | Yes |
| Pellet / Supernatant           | 2005573222 | pfam01476           | Uncharacterized protein containing LysM domain                                 | 144 |             | COG1652 | S  |                     | Yes | Yes |
| Global / Soluble               | 2005585914 | pfam00120           | Uncharacterized protein related to glutamine synt hetase                       | 404 |             | COG3968 | R  |                     | No  | No  |
| Insoluble                      | 2005604527 |                     | Uncharacterized protein related to glutamine synt hetase                       | 202 |             | COG3968 | R  |                     | No  | No  |
| Insoluble / Soluble            | 200563281  | pfam00120           | Uncharacterized protein related to glutamine synt hetase                       | 647 | EC:6.3.1.2  | COG3968 | R  |                     | No  | No  |
| Insoluble / Supernatant        | 2005594615 | pfam00120           | Uncharacterized protein related to glutamine synt hetase                       | 406 |             | COG3968 | R  |                     | No  | No  |
| Pellet                         | 2005582982 | pfam00120           | Uncharacterized protein related to glutamine synt hetase                       | 416 |             | COG3968 | R  |                     | No  | No  |
| Pellet                         | 2005585915 | pfam00120           | Uncharacterized protein related to glutamine synt hetase                       | 483 |             | COG3968 | R  |                     | No  | No  |
| Pellet                         | 2005595630 |                     | Uncharacterized protein related to glutamine synt hetase                       | 145 |             | COG3968 | R  |                     | No  | No  |
| Pellet                         | 2005598372 | pfam00120           | Uncharacterized protein related to glutamine synt hetase                       | 240 |             | COG3968 | R  |                     | No  | No  |
| Pellet                         | 2005601964 | pfam00120           | Uncharacterized protein related to glutamine synt hetase                       | 273 |             | COG3968 | R  |                     | No  | No  |
| Soluble / Supernatant          | 2005578915 | pfam00120           | Uncharacterized protein related to glutamine synt hetase                       | 473 |             | COG3968 | R  |                     | No  | No  |
| Supernatant                    | 200567133  | pfam00120           | Uncharacterized protein related to glutamine synt hetase                       | 396 |             | COG3968 | R  |                     | No  | No  |
| Supernatant                    | 2005608158 | pfam00120           | Uncharacterized protein related to glutamine synt hetase                       | 274 |             | COG3968 | R  |                     | No  | No  |
| Global / Supernatant           | 2005595382 | pfam04026           | Uncharacterized protein, involved in the regulati on of septum location        | 93  |             | COG2088 | M  |                     | No  | No  |
| Supernatant                    | 200563296  | pfam01243           | Uncharacterized stress protein (general stress pr otein 26)                    | 137 |             | COG3871 | R  |                     | No  | No  |
| Pellet                         | 2005574493 | pfam00582           | Universal stress protein UspA and related nucleot ide-binding proteins         | 161 |             | COG0589 | T  |                     | No  | No  |
| Pellet                         | 2005584280 |                     | Uracil phosphoribosyltransferase                                               | 350 | EC:2.4.2.9  | COG0035 | F  |                     | No  | No  |
| Pellet                         | 2005584668 | pfam00547 pfam00699 | Urea amidohydrolase (urease) gamma subunit                                     | 226 | EC:3.5.1.5  | COG0831 | E  | TIGR00192 TIGR00193 | No  | No  |
| Pellet                         | 2005591425 |                     | Uridine kinase                                                                 | 405 |             | COG0572 | F  |                     | No  | No  |
| Insoluble / Soluble / Global   | 2005560430 | pfam00696           | Uridylate kinase                                                               | 162 |             | COG0528 | F  |                     | Yes | No  |
| Supernatant                    | 2005593339 | pfam00590 pfam02602 | Uroporphyrinogen-III synthase                                                  | 318 |             | COG1587 | H  |                     | No  | No  |
| Pellet                         | 2005592748 | pfam00133 pfam08264 | Valyl-tRNA synthetase                                                          | 439 |             | COG0525 | J  |                     | No  | No  |
| Pellet                         | 2005608494 | pfam00133 pfam08264 | Valyl-tRNA synthetase                                                          | 247 |             | COG0525 | J  |                     | No  | No  |
| Soluble                        | 2005570871 | pfam00133 pfam08264 | Valyl-tRNA synthetase                                                          | 485 |             | COG0525 | J  |                     | No  | No  |
| Supernatant                    | 2005585427 |                     | Virulence protein                                                              | 211 |             | COG3943 | R  |                     | No  | No  |
| Pellet / Supernatant           | 200565247  | pfam00860           | Xanthine/uracil permeases                                                      | 282 |             | COG2233 | F  | TIGR00801           | Yes | Yes |
| Supernatant                    | 2005620315 | pfam00860           | Xanthine/uracil permeases                                                      | 234 |             | COG2233 | F  |                     | Yes | Yes |
| Insoluble / Supernatant        | 2005568482 | pfam01261           | Xylose isomerase                                                               | 449 | EC:5.3.1.5  | COG2115 | G  | TIGR02630           | No  | No  |
| Pellet                         | 200563071  | pfam01261           | Xylose isomerase                                                               | 320 | EC:5.3.1.5  | COG2115 | G  | TIGR02630           | No  | No  |
| Pellet                         | 2005616125 | pfam01261           | Xylose isomerase                                                               | 288 |             | COG2115 | G  | TIGR02630           | No  | No  |
| Pellet / Soluble               | 2005613332 | pfam01261           | Xylose isomerase                                                               | 288 |             | COG2115 | G  | TIGR02630           | No  | No  |
| Pellet / Soluble / Supernatant | 200569302  | pfam01261           | Xylose isomerase                                                               | 449 | EC:5.3.1.5  | COG2115 | G  | TIGR02630           | No  | No  |
| Pellet / Supernatant           | 2005589086 | pfam01261           | Xylose isomerase                                                               | 291 | EC:5.3.1.5  | COG2115 | G  | TIGR02630           | Yes | No  |
| Soluble                        | 2005560485 | pfam01261           | Xylose isomerase                                                               | 257 |             | COG2115 | G  | TIGR02630           | No  | No  |
| Soluble                        | 2005571229 | pfam01261           | Xylose isomerase                                                               | 283 |             | COG2115 | G  | TIGR02630           | No  | No  |
| Supernatant                    | 2005564734 | pfam01261           | Xylose isomerase                                                               | 449 | EC:5.3.1.5  | COG2115 | G  | TIGR02630           | No  | No  |
| Supernatant                    | 2005614698 | pfam01261           | Xylose isomerase                                                               | 271 |             | COG2115 | G  | TIGR02630           | Yes | No  |
| Supernatant / Soluble / Global | 2005565090 | pfam01261           | Xylose isomerase                                                               | 309 | EC:5.3.1.5  | COG2115 | G  | TIGR02630           | Yes | No  |
| Soluble                        | 2005563609 | pfam04616           | Xylosidase                                                                     | 317 | EC:3.2.1.55 |         |    |                     | No  | No  |
| Soluble                        | 2005607188 | pfam04616           | Xylosidase                                                                     | 281 | EC:3.2.1.55 |         |    |                     | No  | No  |
| Soluble                        | 2005561953 | pfam04616           | Xylosidase/arabinoxidase                                                       | 336 | EC:3.2.1.55 |         |    |                     | No  | No  |
| Pellet / Supernatant           | 2005578031 |                     | YESW protein                                                                   | 445 |             |         |    |                     | No  | No  |
| Pellet                         | 2005576753 | pfam02591           | Zn-ribbon protein, possibly nucleic acid-binding                               | 152 |             | COG1579 | R  |                     | No  | No  |
| Pellet                         | 2005611439 | pfam02591           | Zn-ribbon protein, possibly nucleic acid-binding                               | 196 |             | COG1579 | R  |                     | No  | No  |
| Pellet                         | 2005630159 | pfam02591           | Zn-ribbon protein, possibly nucleic acid-binding                               | 198 |             | COG1579 | R  |                     | No  | No  |
| Soluble                        | 2005576754 |                     | Zn-ribbon protein, possibly nucleic acid-binding                               | 148 |             | COG1579 | R  |                     | No  | No  |
| Global                         | 2005560695 | pfam08308           |                                                                                | 451 |             |         |    |                     | Yes | Yes |
| Global                         | 2005562108 |                     |                                                                                | 562 |             |         |    |                     | No  | No  |
| Global                         | 2005567384 | pfam00515           |                                                                                | 561 |             |         |    |                     | No  | No  |
| Global                         | 2005567400 |                     |                                                                                | 197 |             |         |    |                     | No  | No  |
| Global                         | 2005570362 |                     |                                                                                | 349 |             |         |    |                     | Yes | Yes |
| Global                         | 2005570519 |                     |                                                                                | 106 |             |         |    |                     | No  | Yes |
| Global                         | 2005571481 |                     |                                                                                | 85  |             | COG1536 | N  |                     | No  | No  |
| Global                         | 2005574812 |                     |                                                                                | 590 |             |         |    |                     | No  | Yes |
| Global                         | 2005576112 |                     |                                                                                | 261 |             |         |    |                     | No  | No  |
| Global                         | 2005577300 |                     |                                                                                | 166 |             |         |    |                     | Yes | No  |
| Global                         | 2005578968 |                     |                                                                                | 483 |             |         |    |                     | Yes | No  |
| Global                         | 2005584823 | pfam01627           |                                                                                | 168 |             |         |    |                     | No  | No  |
| Global                         | 2005585145 |                     |                                                                                | 180 |             |         |    |                     | No  | No  |
| Global                         | 2005585262 |                     |                                                                                | 167 |             |         |    |                     | Yes | Yes |
| Global                         | 2005585326 |                     |                                                                                | 162 |             |         |    |                     | Yes | No  |
| Global                         | 2005585439 |                     |                                                                                | 128 |             |         |    |                     | No  | No  |
| Global                         | 2005586389 |                     |                                                                                | 142 |             |         |    |                     | No  | No  |
| Global                         | 2005586418 | pfam05930           |                                                                                | 92  |             |         |    | TIGR01764           | Yes | No  |
| Global                         | 2005587790 | pfam00781           |                                                                                | 282 |             | COG1597 | IR |                     | No  | No  |
| Global                         | 2005588113 |                     |                                                                                | 59  |             |         |    |                     | No  | No  |
| Global                         | 2005589777 |                     |                                                                                | 333 |             |         |    |                     | No  | No  |
| Global                         | 2005590725 |                     |                                                                                | 373 |             |         |    |                     | No  | No  |
| Global                         | 2005591714 | pfam01882           |                                                                                | 472 |             | COG1721 | R  |                     | Yes | Yes |
| Global                         | 2005591864 |                     |                                                                                | 123 |             | COG1651 | O  |                     | Yes | No  |
| Global                         | 2005592195 |                     |                                                                                | 122 |             |         |    |                     | No  | No  |
| Global                         | 2005592361 |                     |                                                                                | 452 |             |         |    |                     | No  | No  |
| Global                         | 2005596213 |                     |                                                                                | 125 |             |         |    |                     | No  | No  |

|                                           |            |                     |  |      |  |         |     |                     |     |     |
|-------------------------------------------|------------|---------------------|--|------|--|---------|-----|---------------------|-----|-----|
| Global                                    | 2005599073 |                     |  | 214  |  |         |     |                     | No  | No  |
| Global                                    | 2005601241 |                     |  | 214  |  |         |     |                     | Yes | Yes |
| Global                                    | 2005601468 |                     |  | 174  |  |         |     |                     | Yes | Yes |
| Global                                    | 2005602773 |                     |  | 90   |  |         |     |                     | No  | No  |
| Global                                    | 2005606132 | pfam08239           |  | 208  |  |         |     |                     | No  | Yes |
| Global                                    | 2005610989 |                     |  | 88   |  |         |     |                     | Yes | Yes |
| Global                                    | 2005611517 |                     |  | 143  |  |         |     |                     | No  | No  |
| Global                                    | 2005611566 |                     |  | 241  |  |         |     |                     | No  | No  |
| Global                                    | 2005612216 |                     |  | 170  |  |         |     |                     | No  | No  |
| Global                                    | 2005612390 |                     |  | 86   |  |         |     |                     | No  | No  |
| Global                                    | 2005613566 |                     |  | 136  |  |         |     |                     | No  | No  |
| Global                                    | 2005613865 |                     |  | 194  |  |         |     |                     | Yes | Yes |
| Global                                    | 2005615698 |                     |  | 92   |  |         |     |                     | Yes | No  |
| Global                                    | 2005616505 |                     |  | 277  |  |         |     |                     | No  | No  |
| Global                                    | 2005616816 | pfam02685           |  | 89   |  |         |     |                     | No  | No  |
| Global                                    | 2005618350 |                     |  | 287  |  |         |     |                     | No  | No  |
| Global                                    | 2005618847 |                     |  | 276  |  |         |     |                     | No  | Yes |
| Global                                    | 2005619014 |                     |  | 161  |  |         |     |                     | No  | No  |
| Global                                    | 2005619085 |                     |  | 234  |  |         |     |                     | No  | No  |
| Global                                    | 2005619970 |                     |  | 219  |  |         |     |                     | No  | No  |
| Global                                    | 2005620396 |                     |  | 293  |  |         |     |                     | No  | No  |
| Global                                    | 2005620555 |                     |  | 222  |  | COG1597 | R I |                     | No  | No  |
| Global                                    | 2005620674 |                     |  | 257  |  |         |     |                     | No  | No  |
| Global                                    | 2005620968 |                     |  | 262  |  |         |     |                     | No  | No  |
| Global                                    | 2005622721 |                     |  | 243  |  |         |     |                     | Yes | Yes |
| Global                                    | 2005622803 |                     |  | 179  |  |         |     |                     | No  | No  |
| Global                                    | 2005624003 |                     |  | 54   |  |         |     |                     | No  | No  |
| Global                                    | 2005629943 | pfam09603           |  | 200  |  |         |     | TIGR02145           | No  | No  |
| Global                                    | 2005630465 | pfam00589           |  | 92   |  |         |     |                     | No  | No  |
| Global                                    | 2005630631 |                     |  | 142  |  |         |     |                     | No  | No  |
| Global                                    | 2005632284 |                     |  | 124  |  |         |     |                     | Yes | No  |
| Global / Insoluble / Pellet               | 2005591331 |                     |  | 78   |  |         |     |                     | No  | No  |
| Global / Insoluble / Pellet / Supernatant | 2005598838 |                     |  | 58   |  |         |     |                     | Yes | Yes |
| Global / Pellet                           | 2005569021 |                     |  | 51   |  |         |     |                     | No  | No  |
| Global / Pellet                           | 2005572108 |                     |  | 255  |  |         |     |                     | No  | No  |
| Global / Pellet / Supernatant             | 2005577076 |                     |  | 342  |  |         |     |                     | No  | No  |
| Global / Soluble                          | 2005594881 | pfam01547           |  | 356  |  | COG1653 | G   |                     | No  | No  |
| Global / Supernatant                      | 2005574322 |                     |  | 280  |  |         |     |                     | No  | No  |
| Global / Supernatant                      | 2005575744 | pfam00515 pfam07719 |  | 511  |  | COG4105 | R   |                     | No  | No  |
| Global / Supernatant                      | 2005598211 |                     |  | 260  |  |         |     |                     | No  | No  |
| Global / Supernatant                      | 2005599673 |                     |  | 273  |  |         |     | TIGR01352           | Yes | No  |
| Global / Supernatant                      | 2005602221 |                     |  | 221  |  |         |     |                     | No  | No  |
| Global / Supernatant                      | 2005602783 |                     |  | 133  |  |         |     |                     | No  | No  |
| Global / Supernatant                      | 2005608037 | pfam01547           |  | 273  |  | COG1653 | G   |                     | Yes | No  |
| Global / Supernatant                      | 2005608320 |                     |  | 273  |  |         |     |                     | No  | No  |
| Insoluble                                 | 2005561747 |                     |  | 283  |  |         |     |                     | No  | No  |
| Insoluble                                 | 2005565512 |                     |  | 83   |  |         |     |                     | No  | No  |
| Insoluble                                 | 2005566267 |                     |  | 67   |  |         |     |                     | No  | No  |
| Insoluble                                 | 2005566461 |                     |  | 233  |  |         |     |                     | Yes | No  |
| Insoluble                                 | 2005566924 |                     |  | 344  |  |         |     |                     | No  | No  |
| Insoluble                                 | 2005567125 | pfam09603           |  | 238  |  |         |     | TIGR02145           | Yes | No  |
| Insoluble                                 | 2005578990 |                     |  | 269  |  |         |     |                     | No  | No  |
| Insoluble                                 | 2005582510 | pfam10719           |  | 239  |  |         |     |                     | No  | No  |
| Insoluble                                 | 2005585851 | pfam10719           |  | 203  |  |         |     |                     | No  | No  |
| Insoluble                                 | 2005602364 |                     |  | 275  |  |         |     |                     | Yes | No  |
| Insoluble                                 | 2005606350 |                     |  | 94   |  |         |     |                     | No  | Yes |
| Insoluble                                 | 2005620351 |                     |  | 286  |  |         |     |                     | No  | No  |
| Insoluble                                 | 2005629295 | pfam01261           |  | 139  |  | COG1082 | G   |                     | No  | No  |
| Insoluble                                 | 2005632164 |                     |  | 204  |  |         |     |                     | No  | No  |
| Insoluble / Global                        | 2005612177 |                     |  | 157  |  |         |     |                     | No  | No  |
| Insoluble / Pellet                        | 2005588080 | pfam01381           |  | 135  |  | COG3093 | R   | TIGR02607           | No  | No  |
| Insoluble / Pellet                        | 2005591329 |                     |  | 200  |  |         |     |                     | No  | No  |
| Insoluble / Pellet                        | 2005592905 |                     |  | 309  |  |         |     |                     | No  | No  |
| Insoluble / Pellet                        | 2005604799 | pfam00327           |  | 82   |  | COG1841 | J   | TIGR01308           | No  | No  |
| Insoluble / Pellet / Supernatant          | 2005603362 |                     |  | 293  |  |         |     |                     | No  | No  |
| Insoluble / Supernatant                   | 2005572567 |                     |  | 513  |  |         |     | TIGR01352           | No  | No  |
| Insoluble / Supernatant                   | 2005578690 |                     |  | 114  |  |         |     |                     | No  | No  |
| Insoluble / Supernatant                   | 2005582511 |                     |  | 226  |  |         |     |                     | Yes | Yes |
| Insoluble / Supernatant                   | 2005597296 |                     |  | 261  |  |         |     |                     | No  | No  |
| Pellet                                    | 2005560205 |                     |  | 218  |  |         |     |                     | No  | No  |
| Pellet                                    | 2005560233 |                     |  | 276  |  |         |     |                     | No  | No  |
| Pellet                                    | 2005561205 |                     |  | 264  |  |         |     |                     | Yes | No  |
| Pellet                                    | 2005561485 |                     |  | 193  |  | COG2206 | T   |                     | No  | No  |
| Pellet                                    | 2005561572 |                     |  | 342  |  |         |     |                     | No  | No  |
| Pellet                                    | 2005562056 |                     |  | 91   |  |         |     |                     | No  | No  |
| Pellet                                    | 2005562266 |                     |  | 1491 |  |         |     |                     | No  | No  |
| Pellet                                    | 2005562368 |                     |  | 155  |  |         |     |                     | No  | No  |
| Pellet                                    | 2005562383 |                     |  | 162  |  |         |     |                     | Yes | Yes |
| Pellet                                    | 2005562575 | pfam07238           |  | 100  |  |         |     |                     | No  | No  |
| Pellet                                    | 2005563141 |                     |  | 279  |  |         |     |                     | No  | No  |
| Pellet                                    | 2005563832 |                     |  | 97   |  |         |     |                     | No  | No  |
| Pellet                                    | 2005563840 |                     |  | 635  |  |         |     |                     | No  | No  |
| Pellet                                    | 2005565131 |                     |  | 291  |  |         |     |                     | No  | No  |
| Pellet                                    | 2005565407 |                     |  | 175  |  |         |     |                     | No  | No  |
| Pellet                                    | 2005565414 | pfam09603           |  | 600  |  |         |     | TIGR02543 TIGR02145 | No  | No  |
| Pellet                                    | 2005565865 | pfam01436           |  | 498  |  |         |     |                     | Yes | Yes |
| Pellet                                    | 2005566180 |                     |  | 261  |  |         |     |                     | No  | No  |

|        |            |                     |  |      |  |         |     |           |     |     |
|--------|------------|---------------------|--|------|--|---------|-----|-----------|-----|-----|
| Pellet | 2005566366 | pfam03065           |  | 333  |  | COG1449 | G   |           | No  | No  |
| Pellet | 2005567295 |                     |  | 160  |  |         |     |           | No  | No  |
| Pellet | 2005567454 |                     |  | 139  |  |         |     |           | No  | No  |
| Pellet | 2005567657 | pfam01436           |  | 470  |  |         |     |           | Yes | Yes |
| Pellet | 2005567716 |                     |  | 89   |  |         |     |           | No  | No  |
| Pellet | 2005568381 |                     |  | 720  |  |         |     |           | No  | No  |
| Pellet | 2005568513 |                     |  | 128  |  |         |     |           | No  | No  |
| Pellet | 2005569388 |                     |  | 79   |  |         |     |           | No  | No  |
| Pellet | 2005570319 |                     |  | 496  |  |         |     |           | No  | No  |
| Pellet | 2005570645 | pfam03065           |  | 593  |  | COG1449 | G   |           | No  | No  |
| Pellet | 2005570673 |                     |  | 220  |  |         |     |           | No  | No  |
| Pellet | 2005570879 |                     |  | 230  |  |         |     |           | No  | No  |
| Pellet | 2005571345 |                     |  | 146  |  |         |     |           | Yes | No  |
| Pellet | 2005571522 |                     |  | 72   |  |         |     |           | Yes | No  |
| Pellet | 2005571882 | pfam07238           |  | 349  |  |         |     |           | Yes | Yes |
| Pellet | 2005572546 |                     |  | 89   |  |         |     |           | No  | No  |
| Pellet | 2005573961 |                     |  | 394  |  |         |     |           | No  | No  |
| Pellet | 2005574302 |                     |  | 497  |  |         |     |           | Yes | No  |
| Pellet | 2005574507 |                     |  | 275  |  |         |     |           | Yes | No  |
| Pellet | 2005574589 |                     |  | 446  |  |         |     |           | Yes | No  |
| Pellet | 2005574697 |                     |  | 170  |  |         |     |           | Yes | Yes |
| Pellet | 2005574840 |                     |  | 323  |  | COG1196 | D   |           | No  | No  |
| Pellet | 2005574988 |                     |  | 299  |  |         |     |           | No  | No  |
| Pellet | 2005575458 |                     |  | 146  |  |         |     |           | No  | No  |
| Pellet | 2005575586 |                     |  | 170  |  |         |     |           | Yes | No  |
| Pellet | 2005575902 | pfam00831           |  | 61   |  | COG0255 | J   | TIGR00012 | No  | No  |
| Pellet | 2005576747 |                     |  | 460  |  |         |     |           | Yes | No  |
| Pellet | 2005577081 |                     |  | 134  |  |         |     |           | No  | No  |
| Pellet | 2005577093 |                     |  | 155  |  |         |     | TIGR01195 | No  | Yes |
| Pellet | 2005577108 |                     |  | 485  |  |         |     |           | Yes | No  |
| Pellet | 2005577327 |                     |  | 334  |  |         |     |           | No  | No  |
| Pellet | 2005577629 |                     |  | 79   |  | COG0683 | E   |           | Yes | Yes |
| Pellet | 2005578143 |                     |  | 153  |  |         |     |           | No  | No  |
| Pellet | 2005578634 | pfam00037           |  | 269  |  | COG0348 | C   |           | No  | Yes |
| Pellet | 2005578855 |                     |  | 497  |  |         |     |           | No  | No  |
| Pellet | 2005579591 | pfam01547           |  | 381  |  | COG2182 | G   |           | No  | No  |
| Pellet | 2005580462 |                     |  | 97   |  |         |     |           | No  | No  |
| Pellet | 2005580510 |                     |  | 303  |  |         |     |           | Yes | No  |
| Pellet | 2005580614 |                     |  | 206  |  |         |     |           | No  | No  |
| Pellet | 2005580814 |                     |  | 406  |  |         |     |           | No  | Yes |
| Pellet | 2005581120 |                     |  | 299  |  |         |     |           | No  | No  |
| Pellet | 2005581939 |                     |  | 276  |  |         |     |           | No  | No  |
| Pellet | 2005581942 | pfam01649           |  | 91   |  | COG0268 | J   | TIGR00029 | No  | No  |
| Pellet | 2005582136 |                     |  | 124  |  |         |     |           | Yes | No  |
| Pellet | 2005582252 |                     |  | 231  |  |         |     |           | Yes | Yes |
| Pellet | 2005582747 |                     |  | 183  |  |         |     |           | No  | No  |
| Pellet | 2005583014 | pfam01381           |  | 106  |  | COG1396 | K   |           | No  | No  |
| Pellet | 2005586212 |                     |  | 75   |  |         |     |           | No  | No  |
| Pellet | 2005586547 |                     |  | 290  |  |         |     |           | No  | No  |
| Pellet | 2005586775 | pfam00196           |  | 213  |  | COG2197 | T K |           | No  | No  |
| Pellet | 2005586936 |                     |  | 284  |  |         |     |           | No  | No  |
| Pellet | 2005587122 |                     |  | 762  |  |         |     |           | No  | No  |
| Pellet | 2005587425 |                     |  | 164  |  |         |     |           | No  | No  |
| Pellet | 2005587462 |                     |  | 425  |  |         |     |           | No  | No  |
| Pellet | 2005587477 |                     |  | 348  |  |         |     |           | Yes | No  |
| Pellet | 2005587892 |                     |  | 78   |  |         |     |           | No  | No  |
| Pellet | 2005588027 |                     |  | 99   |  |         |     |           | Yes | Yes |
| Pellet | 2005589001 |                     |  | 188  |  |         |     |           | Yes | No  |
| Pellet | 2005589064 | pfam03425           |  | 499  |  |         |     |           | No  | No  |
| Pellet | 2005589109 |                     |  | 278  |  |         |     |           | No  | No  |
| Pellet | 2005589598 |                     |  | 168  |  | COG1597 | R I |           | No  | No  |
| Pellet | 2005589751 |                     |  | 108  |  |         |     |           | Yes | Yes |
| Pellet | 2005590378 |                     |  | 130  |  |         |     |           | No  | No  |
| Pellet | 2005590455 | pfam00196           |  | 318  |  | COG2197 | K T |           | No  | Yes |
| Pellet | 2005590691 |                     |  | 84   |  |         |     |           | No  | No  |
| Pellet | 2005590724 |                     |  | 1438 |  |         |     |           | Yes | No  |
| Pellet | 2005591343 | pfam03781 pfam09479 |  | 254  |  |         |     | TIGR02543 | Yes | No  |
| Pellet | 2005591688 |                     |  | 159  |  |         |     |           | No  | No  |
| Pellet | 2005591875 |                     |  | 32   |  |         |     |           | No  | No  |
| Pellet | 2005591986 |                     |  | 325  |  |         |     |           | Yes | No  |
| Pellet | 2005592830 |                     |  | 305  |  |         |     |           | Yes | Yes |
| Pellet | 2005593215 |                     |  | 383  |  |         |     |           | No  | No  |
| Pellet | 2005593491 |                     |  | 763  |  |         |     |           | No  | No  |
| Pellet | 2005594706 |                     |  | 201  |  |         |     |           | Yes | No  |
| Pellet | 2005594943 |                     |  | 285  |  |         |     |           | No  | No  |
| Pellet | 2005595408 |                     |  | 102  |  |         |     |           | No  | No  |
| Pellet | 2005595574 |                     |  | 73   |  |         |     |           | No  | No  |
| Pellet | 2005596196 |                     |  | 290  |  | COG0544 | O   |           | No  | No  |
| Pellet | 2005596366 | pfam00672           |  | 261  |  | COG3850 | T   |           | Yes | Yes |
| Pellet | 2005596438 |                     |  | 277  |  |         |     |           | No  | No  |
| Pellet | 2005598427 |                     |  | 60   |  |         |     |           | Yes | Yes |
| Pellet | 2005598893 |                     |  | 71   |  |         |     |           | Yes | Yes |
| Pellet | 2005598989 |                     |  | 240  |  |         |     |           | No  | No  |
| Pellet | 2005599215 |                     |  | 282  |  |         |     |           | No  | No  |
| Pellet | 2005599238 | pfam09513           |  | 165  |  |         |     |           | No  | No  |
| Pellet | 2005599822 |                     |  | 280  |  |         |     |           | No  | No  |
| Pellet | 2005599823 |                     |  | 99   |  |         |     |           | No  | No  |

|        |            |           |  |     |  |         |   |           |     |     |
|--------|------------|-----------|--|-----|--|---------|---|-----------|-----|-----|
| Pellet | 2005600076 |           |  | 84  |  |         |   |           | No  | No  |
| Pellet | 2005600320 |           |  | 222 |  |         |   |           | No  | No  |
| Pellet | 2005600522 | pfam05036 |  | 178 |  |         |   |           | Yes | No  |
| Pellet | 2005601321 | pfam07238 |  | 255 |  |         |   |           | No  | No  |
| Pellet | 2005601426 |           |  | 181 |  |         |   |           | No  | No  |
| Pellet | 2005602419 |           |  | 259 |  |         |   |           | No  | No  |
| Pellet | 2005602633 |           |  | 91  |  |         |   |           | No  | No  |
| Pellet | 2005602730 |           |  | 47  |  |         |   |           | No  | No  |
| Pellet | 2005603388 |           |  | 214 |  |         |   |           | No  | No  |
| Pellet | 2005603628 |           |  | 223 |  |         |   |           | Yes | No  |
| Pellet | 2005603694 |           |  | 191 |  |         |   |           | Yes | Yes |
| Pellet | 2005603787 |           |  | 140 |  |         |   |           | No  | No  |
| Pellet | 2005605112 |           |  | 274 |  |         |   |           | No  | No  |
| Pellet | 2005605128 |           |  | 104 |  |         |   |           | Yes | Yes |
| Pellet | 2005605671 | pfam00515 |  | 269 |  |         |   |           | No  | No  |
| Pellet | 2005605728 |           |  | 157 |  | COG1729 | S |           | No  | No  |
| Pellet | 2005605809 |           |  | 283 |  |         |   |           | No  | No  |
| Pellet | 2005606160 |           |  | 271 |  | COG1653 | G |           | No  | No  |
| Pellet | 2005606608 |           |  | 121 |  |         |   |           | No  | No  |
| Pellet | 2005607674 |           |  | 114 |  |         |   |           | No  | No  |
| Pellet | 2005609795 | pfam08308 |  | 291 |  |         |   |           | No  | No  |
| Pellet | 2005610005 |           |  | 204 |  |         |   |           | Yes | Yes |
| Pellet | 2005610286 |           |  | 170 |  |         |   |           | Yes | Yes |
| Pellet | 2005610348 |           |  | 227 |  |         |   |           | Yes | No  |
| Pellet | 2005610504 |           |  | 156 |  |         |   |           | No  | No  |
| Pellet | 2005610788 | pfam09479 |  | 270 |  |         |   | TIGR02543 | No  | No  |
| Pellet | 2005610949 | pfam02609 |  | 61  |  |         |   |           | No  | No  |
| Pellet | 2005612801 |           |  | 73  |  |         |   |           | Yes | Yes |
| Pellet | 2005612980 |           |  | 204 |  |         |   |           | No  | No  |
| Pellet | 2005613085 |           |  | 63  |  |         |   |           | Yes | Yes |
| Pellet | 2005613855 |           |  | 166 |  | COG3415 | L |           | No  | No  |
| Pellet | 2005614881 |           |  | 83  |  |         |   |           | No  | No  |
| Pellet | 2005614965 |           |  | 47  |  |         |   |           | No  | No  |
| Pellet | 2005615240 |           |  | 101 |  |         |   |           | No  | No  |
| Pellet | 2005615579 |           |  | 297 |  |         |   |           | Yes | No  |
| Pellet | 2005616205 |           |  | 290 |  |         |   |           | No  | Yes |
| Pellet | 2005616215 |           |  | 254 |  |         |   |           | Yes | No  |
| Pellet | 2005616504 |           |  | 289 |  |         |   |           | No  | No  |
| Pellet | 2005616656 |           |  | 139 |  |         |   |           | Yes | No  |
| Pellet | 2005617152 |           |  | 150 |  |         |   |           | Yes | Yes |
| Pellet | 2005617399 | pfam00072 |  | 48  |  |         |   |           | No  | No  |
| Pellet | 2005617633 |           |  | 130 |  |         |   |           | Yes | Yes |
| Pellet | 2005619572 |           |  | 93  |  |         |   |           | Yes | Yes |
| Pellet | 2005619944 |           |  | 106 |  |         |   |           | No  | No  |
| Pellet | 2005619977 |           |  | 108 |  |         |   |           | No  | No  |
| Pellet | 2005620923 |           |  | 243 |  |         |   |           | No  | No  |
| Pellet | 2005620935 |           |  | 186 |  |         |   |           | No  | No  |
| Pellet | 2005621212 |           |  | 104 |  |         |   |           | Yes | Yes |
| Pellet | 2005621914 |           |  | 95  |  |         |   |           | No  | No  |
| Pellet | 2005622151 |           |  | 259 |  |         |   |           | No  | No  |
| Pellet | 2005623029 |           |  | 256 |  |         |   |           | No  | No  |
| Pellet | 2005623260 |           |  | 236 |  |         |   |           | No  | No  |
| Pellet | 2005623645 | pfam00015 |  | 127 |  |         |   |           | No  | No  |
| Pellet | 2005623698 |           |  | 297 |  |         |   |           | No  | No  |
| Pellet | 2005623699 |           |  | 262 |  |         |   |           | No  | No  |
| Pellet | 2005624091 |           |  | 280 |  |         |   |           | No  | No  |
| Pellet | 2005624167 |           |  | 280 |  |         |   |           | No  | No  |
| Pellet | 2005624575 |           |  | 164 |  | COG1426 | S |           | No  | Yes |
| Pellet | 2005624579 |           |  | 287 |  |         |   |           | No  | No  |
| Pellet | 2005624956 |           |  | 48  |  |         |   |           | No  | No  |
| Pellet | 2005625044 |           |  | 71  |  |         |   |           | No  | No  |
| Pellet | 2005625288 |           |  | 58  |  | COG2115 | G |           | No  | No  |
| Pellet | 2005625365 | pfam03961 |  | 189 |  | COG1315 | L |           | No  | No  |
| Pellet | 2005625867 |           |  | 83  |  |         |   |           | No  | No  |
| Pellet | 2005625927 |           |  | 273 |  |         |   |           | No  | No  |
| Pellet | 2005626383 | pfam02415 |  | 237 |  |         |   | TIGR01376 | No  | No  |
| Pellet | 2005626821 |           |  | 213 |  |         |   |           | Yes | No  |
| Pellet | 2005626941 | pfam01627 |  | 263 |  |         |   |           | No  | No  |
| Pellet | 2005627411 |           |  | 123 |  |         |   |           | No  | Yes |
| Pellet | 2005627479 |           |  | 275 |  |         |   |           | No  | No  |
| Pellet | 2005627728 |           |  | 151 |  |         |   |           | Yes | No  |
| Pellet | 2005628317 |           |  | 248 |  |         |   |           | Yes | No  |
| Pellet | 2005628409 |           |  | 261 |  |         |   |           | No  | No  |
| Pellet | 2005628462 |           |  | 216 |  |         |   |           | No  | No  |
| Pellet | 2005628619 |           |  | 83  |  |         |   |           | Yes | No  |
| Pellet | 2005628620 |           |  | 163 |  |         |   |           | Yes | Yes |
| Pellet | 2005628698 | pfam00679 |  | 256 |  | COG0480 | J |           | No  | No  |
| Pellet | 2005628728 |           |  | 199 |  |         |   |           | No  | No  |
| Pellet | 2005628839 |           |  | 265 |  |         |   |           | Yes | No  |
| Pellet | 2005628863 |           |  | 271 |  |         |   |           | No  | No  |
| Pellet | 2005629258 | pfam07581 |  | 283 |  |         |   |           | No  | No  |
| Pellet | 2005629326 |           |  | 292 |  |         |   |           | No  | No  |
| Pellet | 2005629770 |           |  | 221 |  | COG1413 | C |           | No  | No  |
| Pellet | 2005630243 |           |  | 157 |  |         |   |           | No  | No  |
| Pellet | 2005630671 |           |  | 274 |  |         |   |           | Yes | No  |
| Pellet | 2005632214 | pfam05036 |  | 235 |  |         |   |           | No  | No  |
| Pellet | 2005632423 |           |  | 89  |  |         |   |           | No  | No  |

|                                  |            |           |  |     |  |         |     |           |     |     |
|----------------------------------|------------|-----------|--|-----|--|---------|-----|-----------|-----|-----|
| Pellet                           | 2005632812 | pfam09822 |  | 74  |  |         |     |           | Yes | Yes |
| Pellet                           | 2005632866 |           |  | 79  |  |         |     |           | No  | No  |
| Pellet                           | 2005632927 |           |  | 172 |  |         |     |           | No  | No  |
| Pellet                           | 2005632958 |           |  | 91  |  |         |     |           | Yes | Yes |
| Pellet                           | 2005632986 |           |  | 191 |  |         |     |           | Yes | No  |
| Pellet                           | 2005633138 |           |  | 151 |  |         |     |           | No  | No  |
| Pellet                           | 2005633263 |           |  | 266 |  |         |     |           | No  | No  |
| Pellet / Global                  | 2005611033 |           |  | 149 |  |         |     |           | No  | No  |
| Pellet / Global                  | 2005621831 |           |  | 242 |  |         |     |           | No  | No  |
| Pellet / Soluble                 | 2005579378 |           |  | 70  |  |         |     |           | No  | No  |
| Pellet / Soluble                 | 2005609310 |           |  | 59  |  |         |     |           | No  | No  |
| Pellet / Soluble / Global        | 2005620900 |           |  | 96  |  | COG4213 | G   |           | Yes | No  |
| Pellet / Supernatant             | 2005582291 |           |  | 57  |  |         |     |           | No  | No  |
| Pellet / Supernatant             | 2005586900 |           |  | 511 |  |         |     |           | No  | No  |
| Pellet / Supernatant             | 2005595341 |           |  | 146 |  |         |     |           | Yes | Yes |
| Pellet / Supernatant             | 2005599690 |           |  | 288 |  |         |     |           | No  | No  |
| Pellet / Supernatant             | 2005600722 |           |  | 138 |  | COG0710 | E   |           | No  | No  |
| Pellet / Supernatant             | 2005600766 |           |  | 285 |  |         |     |           | No  | No  |
| Pellet / Supernatant             | 2005603924 |           |  | 266 |  |         |     |           | No  | No  |
| Pellet / Supernatant             | 2005605955 |           |  | 197 |  |         |     |           | Yes | No  |
| Pellet / Supernatant             | 2005611309 |           |  | 296 |  |         |     |           | No  | No  |
| Pellet / Supernatant             | 2005614176 |           |  | 243 |  |         |     |           | Yes | No  |
| Pellet / Supernatant             | 2005617556 |           |  | 143 |  |         |     |           | No  | No  |
| Pellet / Supernatant             | 2005627417 |           |  | 235 |  |         |     |           | Yes | Yes |
| Pellet / Supernatant             | 2005631293 |           |  | 237 |  |         |     |           | No  | No  |
| Pellet / Supernatant             | 2005632125 |           |  | 122 |  |         |     |           | No  | No  |
| Pellet / Supernatant / Global    | 2005565079 |           |  | 127 |  |         |     |           | Yes | No  |
| Pellet / Supernatant / Insoluble | 2005588409 |           |  | 405 |  |         |     |           | No  | No  |
| Pellet / Supernatant / Soluble   | 2005612615 |           |  | 232 |  | COG1653 | G   |           | No  | No  |
| Pellet / Supernatant / Soluble   | 2005619681 |           |  | 283 |  |         |     |           | No  | No  |
| Pellet / Supernatant / Soluble   | 2005632621 |           |  | 213 |  |         |     | TIGR02148 | Yes | No  |
| Soluble                          | 2005560904 |           |  | 109 |  |         |     |           | No  | No  |
| Soluble                          | 2005561145 |           |  | 48  |  |         |     |           | No  | No  |
| Soluble                          | 2005561497 | pfam00781 |  | 183 |  | COG1597 | R I |           | Yes | No  |
| Soluble                          | 2005561506 |           |  | 79  |  |         |     |           | No  | No  |
| Soluble                          | 2005561897 | pfam01170 |  | 348 |  | COG1041 | L   |           | No  | No  |
| Soluble                          | 2005561963 |           |  | 446 |  |         |     |           | Yes | No  |
| Soluble                          | 2005562440 |           |  | 500 |  |         |     |           | No  | No  |
| Soluble                          | 2005562595 |           |  | 175 |  |         |     |           | No  | No  |
| Soluble                          | 2005562867 | pfam02686 |  | 82  |  | COG0721 | J   | TIGR00135 | No  | No  |
| Soluble                          | 2005563290 |           |  | 287 |  | COG0105 | F   |           | No  | No  |
| Soluble                          | 2005563440 |           |  | 218 |  |         |     |           | No  | No  |
| Soluble                          | 2005564407 |           |  | 221 |  |         |     |           | No  | No  |
| Soluble                          | 2005566384 |           |  | 153 |  |         |     |           | No  | No  |
| Soluble                          | 2005566572 |           |  | 262 |  |         |     |           | Yes | No  |
| Soluble                          | 2005567906 |           |  | 227 |  |         |     |           | No  | No  |
| Soluble                          | 2005568310 | pfam01936 |  | 299 |  |         |     |           | No  | No  |
| Soluble                          | 2005568860 |           |  | 346 |  |         |     |           | Yes | Yes |
| Soluble                          | 2005570638 |           |  | 80  |  | COG1905 | C   |           | No  | No  |
| Soluble                          | 2005570991 |           |  | 833 |  |         |     |           | No  | No  |
| Soluble                          | 2005571079 |           |  | 70  |  |         |     | TIGR00690 | No  | No  |
| Soluble                          | 2005571609 |           |  | 80  |  |         |     |           | No  | No  |
| Soluble                          | 2005571728 |           |  | 134 |  |         |     |           | Yes | No  |
| Soluble                          | 2005573049 |           |  | 143 |  |         |     |           | No  | No  |
| Soluble                          | 2005575502 |           |  | 86  |  |         |     |           | No  | No  |
| Soluble                          | 2005576312 | pfam03629 |  | 163 |  |         |     |           | No  | No  |
| Soluble                          | 2005577687 |           |  | 68  |  |         |     |           | No  | No  |
| Soluble                          | 2005579334 |           |  | 402 |  |         |     |           | No  | No  |
| Soluble                          | 2005579886 | pfam01547 |  | 266 |  | COG1653 | G   |           | No  | No  |
| Soluble                          | 2005580419 |           |  | 147 |  |         |     |           | No  | No  |
| Soluble                          | 2005582589 |           |  | 166 |  |         |     |           | No  | No  |
| Soluble                          | 2005583656 |           |  | 298 |  |         |     |           | No  | No  |
| Soluble                          | 2005583937 | pfam05685 |  | 120 |  | COG4636 | S   |           | No  | No  |
| Soluble                          | 2005584159 |           |  | 136 |  |         |     |           | No  | No  |
| Soluble                          | 2005584888 |           |  | 402 |  |         |     |           | No  | No  |
| Soluble                          | 2005587018 |           |  | 70  |  |         |     |           | No  | No  |
| Soluble                          | 2005589393 |           |  | 65  |  |         |     |           | No  | No  |
| Soluble                          | 2005589436 |           |  | 54  |  |         |     |           | No  | No  |
| Soluble                          | 2005592600 |           |  | 278 |  |         |     |           | Yes | Yes |
| Soluble                          | 2005593188 |           |  | 78  |  |         |     |           | No  | No  |
| Soluble                          | 2005594488 |           |  | 607 |  |         |     |           | No  | No  |
| Soluble                          | 2005595162 |           |  | 318 |  |         |     |           | Yes | Yes |
| Soluble                          | 2005595342 |           |  | 58  |  |         |     |           | No  | No  |
| Soluble                          | 2005595467 |           |  | 346 |  |         |     |           | No  | No  |
| Soluble                          | 2005598359 |           |  | 281 |  |         |     |           | No  | No  |
| Soluble                          | 2005598804 |           |  | 170 |  |         |     |           | No  | Yes |
| Soluble                          | 2005598909 |           |  | 172 |  |         |     |           | Yes | No  |
| Soluble                          | 2005600230 |           |  | 260 |  |         |     |           | Yes | No  |
| Soluble                          | 2005600272 |           |  | 86  |  |         |     |           | Yes | No  |
| Soluble                          | 2005600442 |           |  | 128 |  |         |     |           | No  | No  |
| Soluble                          | 2005603695 |           |  | 77  |  |         |     |           | No  | No  |
| Soluble                          | 2005604620 |           |  | 204 |  |         |     |           | Yes | No  |
| Soluble                          | 2005605090 |           |  | 161 |  |         |     |           | No  | No  |
| Soluble                          | 2005606210 |           |  | 131 |  |         |     |           | No  | No  |
| Soluble                          | 2005608124 |           |  | 66  |  |         |     |           | Yes | Yes |
| Soluble                          | 2005609256 |           |  | 299 |  |         |     |           | No  | No  |
| Soluble                          | 2005609346 |           |  | 214 |  |         |     |           | No  | No  |

|                       |            |           |  |     |  |         |   |           |     |     |
|-----------------------|------------|-----------|--|-----|--|---------|---|-----------|-----|-----|
| Soluble               | 2005609481 |           |  | 211 |  |         |   |           | No  | No  |
| Soluble               | 2005609740 |           |  | 53  |  |         |   |           | No  | No  |
| Soluble               | 2005611137 |           |  | 188 |  |         |   |           | Yes | Yes |
| Soluble               | 2005611469 |           |  | 46  |  |         |   |           | No  | No  |
| Soluble               | 2005611595 |           |  | 242 |  |         |   |           | No  | No  |
| Soluble               | 2005611869 |           |  | 90  |  |         |   |           | No  | No  |
| Soluble               | 2005616373 |           |  | 258 |  |         |   |           | No  | No  |
| Soluble               | 2005616665 |           |  | 215 |  |         |   |           | No  | No  |
| Soluble               | 2005620880 |           |  | 267 |  |         |   |           | Yes | No  |
| Soluble               | 2005622620 |           |  | 265 |  |         |   |           | No  | No  |
| Soluble               | 2005622662 |           |  | 61  |  |         |   |           | No  | No  |
| Soluble               | 2005622664 |           |  | 262 |  |         |   |           | No  | No  |
| Soluble               | 2005623685 |           |  | 281 |  | COG0810 | M | TIGR01352 | No  | No  |
| Soluble               | 2005624221 |           |  | 218 |  |         |   |           | No  | No  |
| Soluble               | 2005624900 |           |  | 136 |  |         |   |           | No  | No  |
| Soluble               | 2005628777 | pfam00700 |  | 258 |  |         |   |           | No  | No  |
| Soluble               | 2005629265 |           |  | 169 |  |         |   |           | No  | No  |
| Soluble               | 2005629506 |           |  | 240 |  |         |   |           | No  | No  |
| Soluble               | 2005629723 |           |  | 225 |  |         |   |           | No  | No  |
| Soluble               | 2005630196 |           |  | 194 |  |         |   |           | No  | No  |
| Soluble               | 2005632762 |           |  | 155 |  |         |   |           | No  | No  |
| Soluble               | 2005633175 |           |  | 62  |  |         |   |           | No  | No  |
| Soluble / Global      | 2005624822 |           |  | 174 |  |         |   |           | No  | No  |
| Soluble / Supernatant | 2005568313 |           |  | 119 |  |         |   |           | No  | No  |
| Soluble / Supernatant | 2005568386 |           |  | 214 |  |         |   |           | No  | No  |
| Soluble / Supernatant | 2005585953 |           |  | 118 |  |         |   |           | No  | No  |
| Soluble / Supernatant | 2005595559 |           |  | 213 |  |         |   |           | No  | No  |
| Supernatant           | 2005560089 | pfam07238 |  | 269 |  |         |   |           | No  | No  |
| Supernatant           | 2005560463 |           |  | 183 |  | COG3656 | S |           | Yes | No  |
| Supernatant           | 2005560476 | pfam02446 |  | 91  |  |         |   |           | No  | No  |
| Supernatant           | 2005562209 |           |  | 102 |  |         |   |           | No  | No  |
| Supernatant           | 2005562277 |           |  | 263 |  |         |   |           | No  | No  |
| Supernatant           | 2005562568 | pfam08774 |  | 126 |  |         |   |           | No  | No  |
| Supernatant           | 2005562779 |           |  | 894 |  |         |   |           | No  | No  |
| Supernatant           | 2005563688 | pfam09603 |  | 375 |  |         |   | TIGR02145 | No  | No  |
| Supernatant           | 2005566022 |           |  | 267 |  |         |   |           | No  | No  |
| Supernatant           | 2005566224 |           |  | 291 |  |         |   | TIGR01784 | No  | No  |
| Supernatant           | 2005568013 |           |  | 54  |  |         |   |           | No  | Yes |
| Supernatant           | 2005570715 |           |  | 201 |  |         |   |           | No  | No  |
| Supernatant           | 2005572008 |           |  | 323 |  |         |   |           | No  | No  |
| Supernatant           | 2005572169 |           |  | 630 |  |         |   |           | Yes | Yes |
| Supernatant           | 2005575378 | pfam08495 |  | 105 |  |         |   |           | No  | No  |
| Supernatant           | 2005576651 |           |  | 355 |  | COG0620 | E |           | No  | No  |
| Supernatant           | 2005577047 |           |  | 262 |  | COG0407 | H |           | No  | No  |
| Supernatant           | 2005578157 |           |  | 282 |  |         |   |           | No  | No  |
| Supernatant           | 2005579707 |           |  | 297 |  |         |   |           | No  | No  |
| Supernatant           | 2005580507 |           |  | 61  |  |         |   |           | No  | No  |
| Supernatant           | 2005580706 |           |  | 165 |  |         |   |           | No  | No  |
| Supernatant           | 2005580750 | pfam05036 |  | 213 |  | COG3087 | D |           | No  | No  |
| Supernatant           | 2005581515 | pfam10719 |  | 243 |  |         |   |           | No  | No  |
| Supernatant           | 2005583663 | pfam06114 |  | 191 |  |         |   |           | No  | No  |
| Supernatant           | 2005584446 |           |  | 302 |  |         |   |           | No  | No  |
| Supernatant           | 2005585685 |           |  | 46  |  |         |   |           | No  | No  |
| Supernatant           | 2005587675 |           |  | 117 |  |         |   | TIGR00741 | No  | No  |
| Supernatant           | 2005589158 |           |  | 245 |  |         |   |           | Yes | Yes |
| Supernatant           | 2005590242 |           |  | 155 |  |         |   |           | No  | No  |
| Supernatant           | 2005590246 | pfam09479 |  | 276 |  |         |   | TIGR02543 | No  | No  |
| Supernatant           | 2005590336 |           |  | 145 |  |         |   |           | No  | No  |
| Supernatant           | 2005590354 |           |  | 262 |  |         |   |           | No  | No  |
| Supernatant           | 2005591988 |           |  | 368 |  |         |   |           | No  | No  |
| Supernatant           | 2005592066 |           |  | 255 |  |         |   |           | No  | No  |
| Supernatant           | 2005592428 |           |  | 96  |  |         |   |           | Yes | No  |
| Supernatant           | 2005594369 |           |  | 294 |  |         |   |           | No  | No  |
| Supernatant           | 2005594769 |           |  | 592 |  |         |   |           | No  | No  |
| Supernatant           | 2005595033 |           |  | 109 |  |         |   |           | Yes | Yes |
| Supernatant           | 2005596059 |           |  | 287 |  |         |   |           | Yes | Yes |
| Supernatant           | 2005596579 | pfam07715 |  | 113 |  |         |   |           | Yes | Yes |
| Supernatant           | 2005596623 |           |  | 167 |  |         |   |           | No  | No  |
| Supernatant           | 2005596859 | pfam07690 |  | 286 |  |         |   |           | Yes | Yes |
| Supernatant           | 2005597723 | pfam09603 |  | 201 |  |         |   | TIGR02145 | Yes | No  |
| Supernatant           | 2005598549 |           |  | 264 |  |         |   |           | No  | No  |
| Supernatant           | 2005600609 | pfam06182 |  | 102 |  | COG3694 | R |           | No  | Yes |
| Supernatant           | 2005600842 |           |  | 156 |  |         |   |           | No  | No  |
| Supernatant           | 2005601089 |           |  | 86  |  |         |   |           | Yes | No  |
| Supernatant           | 2005602144 |           |  | 90  |  |         |   |           | No  | No  |
| Supernatant           | 2005602831 |           |  | 170 |  |         |   |           | No  | No  |
| Supernatant           | 2005603393 |           |  | 285 |  |         |   |           | No  | No  |
| Supernatant           | 2005603686 |           |  | 110 |  |         |   |           | No  | No  |
| Supernatant           | 2005604079 |           |  | 96  |  |         |   |           | No  | No  |
| Supernatant           | 2005604364 |           |  | 248 |  |         |   |           | No  | No  |
| Supernatant           | 2005604821 |           |  | 207 |  |         |   |           | Yes | No  |
| Supernatant           | 2005605394 |           |  | 42  |  |         |   |           | No  | No  |
| Supernatant           | 2005605881 |           |  | 33  |  |         |   |           | No  | No  |
| Supernatant           | 2005607213 | pfam02368 |  | 269 |  |         |   |           | Yes | No  |
| Supernatant           | 2005607557 |           |  | 109 |  |         |   |           | No  | No  |
| Supernatant           | 2005608531 |           |  | 293 |  |         |   |           | No  | No  |
| Supernatant           | 2005609219 |           |  | 107 |  |         |   |           | No  | No  |

|                                |            |           |  |     |  |         |     |           |     |     |
|--------------------------------|------------|-----------|--|-----|--|---------|-----|-----------|-----|-----|
| Supernatant                    | 2005611084 |           |  | 197 |  |         |     |           | Yes | No  |
| Supernatant                    | 2005611258 |           |  | 292 |  |         |     |           | No  | No  |
| Supernatant                    | 2005611371 |           |  | 218 |  |         |     |           | No  | No  |
| Supernatant                    | 2005612739 |           |  | 291 |  |         |     |           | No  | No  |
| Supernatant                    | 2005613315 |           |  | 267 |  |         |     |           | No  | No  |
| Supernatant                    | 2005613823 |           |  | 282 |  |         |     |           | No  | No  |
| Supernatant                    | 2005615037 |           |  | 268 |  |         |     |           | No  | No  |
| Supernatant                    | 2005617330 |           |  | 88  |  |         |     |           | No  | No  |
| Supernatant                    | 2005617625 |           |  | 294 |  |         |     |           | No  | No  |
| Supernatant                    | 2005617753 |           |  | 130 |  |         |     |           | Yes | No  |
| Supernatant                    | 2005617989 |           |  | 298 |  |         |     |           | No  | No  |
| Supernatant                    | 2005618992 |           |  | 102 |  |         |     |           | Yes | Yes |
| Supernatant                    | 2005619512 |           |  | 198 |  |         |     |           | No  | No  |
| Supernatant                    | 2005619743 |           |  | 130 |  |         |     |           | No  | No  |
| Supernatant                    | 2005619893 |           |  | 180 |  |         |     |           | No  | No  |
| Supernatant                    | 2005620644 |           |  | 259 |  |         |     |           | Yes | Yes |
| Supernatant                    | 2005621057 |           |  | 295 |  |         |     |           | Yes | No  |
| Supernatant                    | 2005621921 |           |  | 116 |  |         |     |           | Yes | Yes |
| Supernatant                    | 2005623268 |           |  | 227 |  |         |     |           | No  | No  |
| Supernatant                    | 2005624758 | pfam00482 |  | 176 |  | COG1459 | U N |           | Yes | Yes |
| Supernatant                    | 2005625001 | pfam08478 |  | 128 |  | COG1589 | M   |           | Yes | Yes |
| Supernatant                    | 2005626330 |           |  | 279 |  |         |     |           | No  | No  |
| Supernatant                    | 2005626404 |           |  | 64  |  |         |     |           | No  | No  |
| Supernatant                    | 2005627416 |           |  | 290 |  |         |     |           | No  | No  |
| Supernatant                    | 2005627578 |           |  | 93  |  |         |     |           | Yes | No  |
| Supernatant                    | 2005628423 |           |  | 279 |  | COG1653 | G   |           | No  | No  |
| Supernatant                    | 2005629282 |           |  | 63  |  |         |     |           | No  | No  |
| Supernatant                    | 2005629582 |           |  | 112 |  |         |     |           | Yes | Yes |
| Supernatant                    | 2005629801 |           |  | 112 |  |         |     |           | No  | No  |
| Supernatant                    | 2005630337 |           |  | 97  |  |         |     |           | No  | No  |
| Supernatant                    | 2005631665 | pfam01471 |  | 277 |  |         |     |           | No  | No  |
| Supernatant                    | 2005632502 |           |  | 66  |  |         |     |           | No  | No  |
| Supernatant                    | 2005633025 |           |  | 84  |  |         |     |           | Yes | Yes |
| Supernatant / Global           | 2005563474 | pfam09603 |  | 205 |  |         |     | TIGR02145 | Yes | Yes |
| Supernatant / Global           | 2005616675 | pfam00669 |  | 52  |  | COG1344 | N   |           | No  | No  |
| Supernatant / Global           | 2005621644 |           |  | 200 |  |         |     |           | No  | No  |
| Supernatant / Global           | 2005628642 |           |  | 108 |  | COG3093 | R   |           | Yes | No  |
| Supernatant / Insoluble        | 2005611538 |           |  | 129 |  |         |     |           | No  | No  |
| Supernatant / Soluble          | 2005630058 |           |  | 72  |  |         |     |           | No  | No  |
| Supernatant / Soluble / Global | 200562891  |           |  | 107 |  | COG3093 | R   |           | Yes | No  |

pfams included in table 1

**Supplemental Table 5. How does a 1%FDR effect the protein functions identified in this microbial community**

A subset of data was used to generate these tables; specifically, +2 peptides from our second sample preparation (supernatant and pellet) LTQ data sets

**(a) Protein descriptions results with a 10% FDR (DeICN =  $\geq 0.14$ )**

|    | Protein Description                                                                                    | Number of Proteins ( $\geq 2$ peptides) |
|----|--------------------------------------------------------------------------------------------------------|-----------------------------------------|
| 1  | unannotated [Termite Gut (version 3)]                                                                  | 27                                      |
| 2  | 3-phosphoglycerate kinase [Termite Gut (version 3)]                                                    | 7                                       |
| 3  | 6Fe-6S prismatic cluster-containing protein [Termite Gut (version 3)]                                  | 1                                       |
| 4  | ABC-type branched-chain amino acid transport systems, periplasmic component [Termite Gut (version 3)]  | 2                                       |
| 5  | ABC-type dipeptide transport system, periplasmic component [Termite Gut (version 3)]                   | 1                                       |
| 6  | ABC-type phosphate transport system, periplasmic component [Termite Gut (version 3)]                   | 2                                       |
| 7  | ABC-type sugar transport system, periplasmic component [Termite Gut (version 3)]                       | 16                                      |
| 8  | ABC-type sugar transport systems, ATPase components [Termite Gut (version 3)]                          | 4                                       |
| 9  | ABC-type xylose transport system, periplasmic component [Termite Gut (version 3)]                      | 10                                      |
| 10 | Acetate kinase [Termite Gut (version 3)]                                                               | 2                                       |
| 11 | ACT domain-containing protein [Termite Gut (version 3)]                                                | 1                                       |
| 12 | Acyl-CoA synthetase (NDP forming) [Termite Gut (version 3)]                                            | 1                                       |
| 13 | Adenylate kinase and related kinases [Termite Gut (version 3)]                                         | 2                                       |
| 14 | ADP-glucose pyrophosphorylase [Termite Gut (version 3)]                                                | 1                                       |
| 15 | Aerobic-type carbon monoxide dehydrogenase, large subunit CoxL/CutL homologs [Termite Gut (version 3)] | 1                                       |
| 16 | Alanine dehydrogenase [Termite Gut (version 3)]                                                        | 2                                       |
| 17 | Ammonia permease [Termite Gut (version 3)]                                                             | 2                                       |
| 18 | Archaeal/vacuolar-type H <sup>+</sup> -ATPase subunit A [Termite Gut (version 3)]                      | 9                                       |
| 19 | Archaeal/vacuolar-type H <sup>+</sup> -ATPase subunit B [Termite Gut (version 3)]                      | 5                                       |
| 20 | Archaeal/vacuolar-type H <sup>+</sup> -ATPase subunit E [Termite Gut (version 3)]                      | 3                                       |
| 21 | Chaperonin GroEL (HSP60 family) [Termite Gut (version 3)]                                              | 6                                       |
| 22 | Chemotaxis protein histidine kinase and related kinases [Termite Gut (version 3)]                      | 5                                       |
| 23 | Chemotaxis signal transduction protein [Termite Gut (version 3)]                                       | 4                                       |
| 24 | CO dehydrogenase/acetyl-CoA synthase beta subunit [Termite Gut (version 3)]                            | 1                                       |
| 25 | Co-chaperonin GroES (HSP10) [Termite Gut (version 3)]                                                  | 3                                       |
| 26 | Coenzyme F390 synthetase [Termite Gut (version 3)]                                                     | 1                                       |
| 27 | Cytoplasmic filament protein A [Termite Gut (version 3)]                                               | 7                                       |
| 28 | DNA-directed RNA polymerase, beta subunit/140 kD subunit [Termite Gut (version 3)]                     | 1                                       |
| 29 | DNA-directed RNA polymerase, beta' subunit/160 kD subunit [Termite Gut (version 3)]                    | 1                                       |
| 30 | Enolase [Termite Gut (version 3)]                                                                      | 7                                       |



|    |                                                                                                        |    |
|----|--------------------------------------------------------------------------------------------------------|----|
| 31 | Ethanolamine ammonia-lyase, large subunit [Termite Gut (version 3)]                                    | 1  |
| 32 | Exopolyphosphatase-related proteins [Termite Gut (version 3)]                                          | 2  |
| 33 | Ferredoxin [Termite Gut (version 3)]                                                                   | 1  |
| 34 | Flagellar filament outer layer protein (FLAA-2) [Termite Gut (version 3)]                              | 1  |
| 35 | Flagellar filament outer layer protein [Termite Gut (version 3)]                                       | 4  |
| 36 | Flagellar filament outer layer protein FlaA, putative [Termite Gut (version 3)]                        | 1  |
| 37 | Flagellar filament outer layer protein precursor (Sheath protein) [Termite Gut (version 3)]            | 2  |
| 38 | Flagellin and related hook-associated proteins [Termite Gut (version 3)]                               | 41 |
| 39 | FOG [Termite Gut (version 3)]                                                                          | 1  |
| 40 | Fructose/tagatose bisphosphate aldolase [Termite Gut (version 3)]                                      | 5  |
| 41 | Glucan phosphorylase [Termite Gut (version 3)]                                                         | 6  |
| 42 | Glucose-6-phosphate isomerase [Termite Gut (version 3)]                                                | 2  |
| 43 | Glutamate dehydrogenase/leucine dehydrogenase [Termite Gut (version 3)]                                | 4  |
| 44 | Glutamate synthase domain 2 [Termite Gut (version 3)]                                                  | 2  |
| 45 | Glyceraldehyde-3-phosphate dehydrogenase/erythrose 4-phosphate dehydrogenase [Termite Gut (version 3)] | 9  |
| 46 | Glycine/serine hydroxymethyltransferase [Termite Gut (version 3)]                                      | 1  |
| 47 | Glycyl-tRNA synthetase (class II) [Termite Gut (version 3)]                                            | 1  |
| 48 | GTPases - translation elongation factors [Termite Gut (version 3)]                                     | 9  |
| 49 | Hypothetical lipoprotein FN1899 [Termite Gut (version 3)]                                              | 1  |
| 50 | Hypothetical protein CAC2564 [Termite Gut (version 3)]                                                 | 1  |
| 51 | Hypothetical protein TP0747 [Termite Gut (version 3)]                                                  | 1  |
| 52 | Hypothetical protein TTE2422 [Termite Gut (version 3)]                                                 | 1  |
| 53 | Inorganic pyrophosphatase [Termite Gut (version 3)]                                                    | 1  |
| 54 | Iron only hydrogenase large subunit, C-terminal domain [Termite Gut (version 3)]                       | 3  |
| 55 | Major membrane protein I [Termite Gut (version 3)]                                                     | 2  |
| 56 | Malate/lactate dehydrogenases [Termite Gut (version 3)]                                                | 1  |
| 57 | Maltose-binding periplasmic proteins/domains [Termite Gut (version 3)]                                 | 1  |
| 58 | Membrane protease subunits, stomatin/prohibitin homologs [Termite Gut (version 3)]                     | 1  |
| 59 | Methionine synthase I, cobalamin-binding domain [Termite Gut (version 3)]                              | 1  |
| 60 | Methyl-accepting chemotaxis protein [Termite Gut (version 3)]                                          | 16 |
| 61 | Methylmalonyl-CoA mutase, N-terminal domain/subunit [Termite Gut (version 3)]                          | 1  |
| 62 | Molecular chaperone [Termite Gut (version 3)]                                                          | 2  |
| 63 | Molecular chaperone, HSP90 family [Termite Gut (version 3)]                                            | 1  |
| 64 | NAD-dependent aldehyde dehydrogenases [Termite Gut (version 3)]                                        | 1  |

|    |                                                                                                          |    |
|----|----------------------------------------------------------------------------------------------------------|----|
| 65 | NADH [Termite Gut (version 3)]                                                                           | 1  |
| 66 | NifU homolog involved in Fe-S cluster formation [Termite Gut (version 3)]                                | 1  |
| 67 | Nitrogen regulatory protein PII [Termite Gut (version 3)]                                                | 3  |
| 68 | Nitrogenase subunit NifH (ATPase) [Termite Gut (version 3)]                                              | 2  |
| 69 | O-acetylhomoserine sulfhydrylase [Termite Gut (version 3)]                                               | 1  |
| 70 | Outer membrane protein and related peptidoglycan- associated (lipo)proteins [Termite Gut (version 3)]    | 1  |
| 71 | Phosphoenolpyruvate carboxykinase (GTP) [Termite Gut (version 3)]                                        | 6  |
| 72 | Phosphoenolpyruvate synthase/pyruvate phosphate dikinase [Termite Gut (version 3)]                       | 11 |
| 73 | Phosphoglyceromutase [Termite Gut (version 3)]                                                           | 1  |
| 74 | Phosphoserine aminotransferase [Termite Gut (version 3)]                                                 | 1  |
| 75 | Phosphotransacetylase [Termite Gut (version 3)]                                                          | 1  |
| 76 | Polyribonucleotide nucleotidyltransferase (polynucleotide phosphorylase) [Termite Gut (version 3)]       | 3  |
| 77 | Predicted inhibitor of MCP methylation, homolog of CheC [Termite Gut (version 3)]                        | 1  |
| 78 | Predicted solute binding protein [Termite Gut (version 3)]                                               | 1  |
| 79 | Protease subunit of ATP-dependent Clp proteases [Termite Gut (version 3)]                                | 1  |
| 80 | Putative sugar binding secreted protein [Termite Gut (version 3)]                                        | 3  |
| 81 | Pyruvate [Termite Gut (version 3)]                                                                       | 13 |
| 82 | Pyruvate kinase [Termite Gut (version 3)]                                                                | 3  |
| 83 | Pyruvate/oxaloacetate carboxyltransferase [Termite Gut (version 3)]                                      | 4  |
| 84 | Response regulator containing a CheY-like receiver domain and an HD-GYP domain [Termite Gut (version 3)] | 1  |
| 85 | Ribosomal protein L3 [Termite Gut (version 3)]                                                           | 1  |
| 86 | Ribosomal protein L7/L12 [Termite Gut (version 3)]                                                       | 1  |
| 87 | Ribosomal protein S15P/S13E [Termite Gut (version 3)]; Duplicate proteins: 2005593039                    | 1  |
| 88 | Ribosomal protein S19 [Termite Gut (version 3)]                                                          | 1  |
| 89 | Ribosomal protein S2 [Termite Gut (version 3)]                                                           | 1  |
| 90 | Ribosomal protein S3 [Termite Gut (version 3)]                                                           | 1  |
| 91 | Ribosomal protein S4 and related proteins [Termite Gut (version 3)]                                      | 1  |
| 92 | Ribosomal protein S5 [Termite Gut (version 3)]                                                           | 2  |
| 93 | RNA-binding proteins (RRM domain) [Termite Gut (version 3)]                                              | 1  |
| 94 | Rubryerythrin [Termite Gut (version 3)]                                                                  | 3  |
| 95 | S-adenosylhomocysteine hydrolase [Termite Gut (version 3)]                                               | 3  |
| 96 | S-adenosylmethionine synthetase [Termite Gut (version 3)]                                                | 1  |
| 97 | Selenocysteine lyase [Termite Gut (version 3)]                                                           | 1  |
| 98 | Succinate dehydrogenase/fumarate reductase, flavo protein subunit [Termite Gut (version 3)]              | 1  |

|     |                                                                                                                |   |
|-----|----------------------------------------------------------------------------------------------------------------|---|
| 99  | Sugar ABC transporter sugar-binding protein [Termite Gut (version 3)]                                          | 1 |
| 100 | Transcription termination factor [Termite Gut (version 3)]                                                     | 2 |
| 101 | Transketolase [Termite Gut (version 3)]                                                                        | 1 |
| 102 | Translation elongation factors (GTPases) [Termite Gut (version 3)]                                             | 3 |
| 103 | Triosephosphate isomerase [Termite Gut (version 3)]                                                            | 4 |
| 104 | Uncharacterized ABC-type transport system, periplasmic component/surface lipoprotein [Termite Gut (version 3)] | 2 |
| 105 | Uncharacterized protein related to glutamine synthetase [Termite Gut (version 3)]                              | 5 |
| 106 | Xylose isomerase [Termite Gut (version 3)]                                                                     | 3 |

**(b) Protein descriptions results with a 1% FDR (DelCN =  $\geq 0.22$ )**

|    | Protein Description                                                                                    | Number of Proteins ( $\geq 2$ peptides) |
|----|--------------------------------------------------------------------------------------------------------|-----------------------------------------|
| 1  | unannotated [Termite Gut (version 3)]                                                                  | 16                                      |
| 2  | 3-phosphoglycerate kinase [Termite Gut (version 3)]                                                    | 7                                       |
| 3  | 6Fe-6S prismatic cluster-containing protein [Termite Gut (version 3)]                                  | 1                                       |
| 4  | ABC-type branched-chain amino acid transport systems, periplasmic component [Termite Gut (version 3)]  | 1                                       |
| 5  | ABC-type phosphate transport system, periplasmic component [Termite Gut (version 3)]                   | 2                                       |
| 6  | ABC-type sugar transport system, periplasmic component [Termite Gut (version 3)]                       | 14                                      |
| 7  | ABC-type sugar transport systems, ATPase components [Termite Gut (version 3)]                          | 4                                       |
| 8  | ABC-type xylose transport system, periplasmic component [Termite Gut (version 3)]                      | 9                                       |
| 9  | Acetate kinase [Termite Gut (version 3)]                                                               | 2                                       |
| 10 | ACT domain-containing protein [Termite Gut (version 3)]                                                | 1                                       |
| 11 | Acyl-CoA synthetase (NDP forming) [Termite Gut (version 3)]                                            | 1                                       |
| 12 | Adenylate kinase and related kinases [Termite Gut (version 3)]                                         | 1                                       |
| 13 | ADP-glucose pyrophosphorylase [Termite Gut (version 3)]                                                | 1                                       |
| 14 | Aerobic-type carbon monoxide dehydrogenase, large subunit CoxL/CutL homologs [Termite Gut (version 3)] | 1                                       |
| 15 | Alanine dehydrogenase [Termite Gut (version 3)]                                                        | 2                                       |
| 16 | Archaeal/vacuolar-type H <sup>+</sup> -ATPase subunit A [Termite Gut (version 3)]                      | 6                                       |
| 17 | Archaeal/vacuolar-type H <sup>+</sup> -ATPase subunit B [Termite Gut (version 3)]                      | 5                                       |
| 18 | Archaeal/vacuolar-type H <sup>+</sup> -ATPase subunit E [Termite Gut (version 3)]                      | 1                                       |
| 19 | Chaperonin GroEL (HSP60 family) [Termite Gut (version 3)]                                              | 2                                       |
| 20 | Chemotaxis protein histidine kinase and related kinases [Termite Gut (version 3)]                      | 4                                       |
| 21 | Chemotaxis signal transduction protein [Termite Gut (version 3)]                                       | 3                                       |
| 22 | CO dehydrogenase/acetyl-CoA synthase beta subunit [Termite Gut (version 3)]                            | 1                                       |
| 23 | Co-chaperonin GroES (HSP10) [Termite Gut (version 3)]                                                  | 1                                       |
| 24 | Cytoplasmic filament protein A [Termite Gut (version 3)]                                               | 5                                       |

|    |                                                                                                        |    |
|----|--------------------------------------------------------------------------------------------------------|----|
| 25 | Enolase [Termite Gut (version 3)]                                                                      | 4  |
| 26 | Ethanolamine ammonia-lyase, large subunit [Termite Gut (version 3)]                                    | 1  |
| 27 | Exopolyphosphatase-related proteins [Termite Gut (version 3)]                                          | 1  |
| 28 | Flagellar filament outer layer protein [Termite Gut (version 3)]                                       | 3  |
| 29 | Flagellar filament outer layer protein FlaA, putative [Termite Gut (version 3)]                        | 1  |
| 30 | Flagellar filament outer layer protein precursor (Sheath protein) [Termite Gut (version 3)]            | 1  |
| 31 | Flagellin and related hook-associated proteins [Termite Gut (version 3)]                               | 34 |
| 32 | FOG [Termite Gut (version 3)]                                                                          | 1  |
| 33 | Fructose/tagatose biphosphate aldolase [Termite Gut (version 3)]                                       | 3  |
| 34 | Glucan phosphorylase [Termite Gut (version 3)]                                                         | 5  |
| 35 | Glucose-6-phosphate isomerase [Termite Gut (version 3)]                                                | 2  |
| 36 | Glutamate dehydrogenase/leucine dehydrogenase [Termite Gut (version 3)]                                | 4  |
| 37 | Glutamate synthase domain 2 [Termite Gut (version 3)]                                                  | 2  |
| 38 | Glyceraldehyde-3-phosphate dehydrogenase/erythrose-4-phosphate dehydrogenase [Termite Gut (version 3)] | 4  |
| 39 | Glycine/serine hydroxymethyltransferase [Termite Gut (version 3)]                                      | 1  |
| 40 | Glycyl-tRNA synthetase (class II) [Termite Gut (version 3)]                                            | 1  |
| 41 | GTPases - translation elongation factors [Termite Gut (version 3)]                                     | 6  |
| 42 | Hypothetical lipoprotein FN1899 [Termite Gut (version 3)]                                              | 1  |
| 43 | Hypothetical protein CAC2564 [Termite Gut (version 3)]                                                 | 1  |
| 44 | Hypothetical protein TP0747 [Termite Gut (version 3)]                                                  | 1  |
| 45 | Hypothetical protein TTE2422 [Termite Gut (version 3)]                                                 | 1  |
| 46 | Inorganic pyrophosphatase [Termite Gut (version 3)]                                                    | 1  |
| 47 | Iron only hydrogenase large subunit, C-terminal domain [Termite Gut (version 3)]                       | 2  |
| 48 | Major membrane protein I [Termite Gut (version 3)]                                                     | 2  |
| 49 | Malate/lactate dehydrogenases [Termite Gut (version 3)]                                                | 1  |
| 50 | Maltose-binding periplasmic proteins/domains [Termite Gut (version 3)]                                 | 1  |
| 51 | Membrane protease subunits, stomatin/prohibitin homologs [Termite Gut (version 3)]                     | 1  |
| 52 | Methionine synthase I, cobalamin-binding domain [Termite Gut (version 3)]                              | 1  |
| 53 | Methyl-accepting chemotaxis protein [Termite Gut (version 3)]                                          | 10 |
| 54 | Methylmalonyl-CoA mutase, N-terminal domain/subunit [Termite Gut (version 3)]                          | 1  |
| 55 | Molecular chaperone [Termite Gut (version 3)]                                                          | 1  |
| 56 | Molecular chaperone, HSP90 family [Termite Gut (version 3)]                                            | 1  |
| 57 | NAD-dependent aldehyde dehydrogenases [Termite Gut (version 3)]                                        | 1  |
| 58 | NADH [Termite Gut (version 3)]                                                                         | 1  |

|    |                                                                                                                |   |
|----|----------------------------------------------------------------------------------------------------------------|---|
| 59 | NifU homolog involved in Fe-S cluster formation [Termite Gut (version 3)]                                      | 1 |
| 60 | Nitrogen regulatory protein PII [Termite Gut (version 3)]                                                      | 1 |
| 61 | Nitrogenase subunit NifH (ATPase) [Termite Gut (version 3)]                                                    | 1 |
| 62 | Phosphoenolpyruvate carboxykinase (GTP) [Termite Gut (version 3)]                                              | 4 |
| 63 | Phosphoenolpyruvate synthase/pyruvate phosphate dikinase [Termite Gut (version 3)]                             | 8 |
| 64 | Phosphotransacetylase [Termite Gut (version 3)]                                                                | 1 |
| 65 | Polyribonucleotide nucleotidyltransferase (polynucleotide phosphorylase) [Termite Gut (version 3)]             | 3 |
| 66 | Predicted inhibitor of MCP methylation, homolog of CheC [Termite Gut (version 3)]                              | 1 |
| 67 | Predicted solute binding protein [Termite Gut (version 3)]                                                     | 1 |
| 68 | Putative sugar binding secreted protein [Termite Gut (version 3)]                                              | 3 |
| 69 | Pyruvate [Termite Gut (version 3)]                                                                             | 9 |
| 70 | Pyruvate kinase [Termite Gut (version 3)]                                                                      | 1 |
| 71 | Pyruvate/oxaloacetate carboxyltransferase [Termite Gut (version 3)]                                            | 2 |
| 72 | Ribosomal protein L3 [Termite Gut (version 3)]                                                                 | 1 |
| 73 | Ribosomal protein S15P/S13E [Termite Gut (version 3)]; Duplicate proteins: 2005593039                          | 1 |
| 74 | Ribosomal protein S5 [Termite Gut (version 3)]                                                                 | 1 |
| 75 | RNA-binding proteins (RRM domain) [Termite Gut (version 3)]                                                    | 1 |
| 76 | Rubryerythrin [Termite Gut (version 3)]                                                                        | 3 |
| 77 | S-adenosylhomocysteine hydrolase [Termite Gut (version 3)]                                                     | 3 |
| 78 | S-adenosylmethionine synthetase [Termite Gut (version 3)]                                                      | 1 |
| 79 | Selenocysteine lyase [Termite Gut (version 3)]                                                                 | 1 |
| 80 | Succinate dehydrogenase/fumarate reductase, flavo protein subunit [Termite Gut (version 3)]                    | 1 |
| 81 | Sugar ABC transporter sugar-binding protein [Termite Gut (version 3)]                                          | 1 |
| 82 | Transcription termination factor [Termite Gut (version 3)]                                                     | 1 |
| 83 | Translation elongation factors (GTPases) [Termite Gut (version 3)]                                             | 2 |
| 84 | Triosephosphate isomerase [Termite Gut (version 3)]                                                            | 3 |
| 85 | Uncharacterized ABC-type transport system, periplasmic component/surface lipoprotein [Termite Gut (version 3)] | 2 |
| 86 | Uncharacterized protein related to glutamine synthetase [Termite Gut (version 3)]                              | 4 |
| 87 | Xylose isomerase [Termite Gut (version 3)]                                                                     | 3 |

**(c) Protein descriptions which were filtered out with a 1% FDR compared to a 10% FDR**

|   | Protein Description                                                                  | Number of Proteins ( $\geq 2$ peptides) |
|---|--------------------------------------------------------------------------------------|-----------------------------------------|
| 1 | ABC-type dipeptide transport system, periplasmic component [Termite Gut (version 3)] | 1                                       |
| 2 | Ammonia permease [Termite Gut (version 3)]                                           | 2                                       |
| 3 | Coenzyme F390 synthetase [Termite Gut (version 3)]                                   | 1                                       |

|    |                                                                                                           |   |
|----|-----------------------------------------------------------------------------------------------------------|---|
| 4  | DNA-directed RNA polymerase, beta subunit/140 kD subunit [Termite Gut (version 3)]                        | 1 |
| 5  | DNA-directed RNA polymerase, beta' subunit/160 kD subunit [Termite Gut (version 3)]                       | 1 |
| 6  | Ferredoxin [Termite Gut (version 3)]                                                                      | 1 |
| 7  | Flagellar filament outer layer protein (FLAA-2) [Termite Gut (version 3)]                                 | 1 |
| 8  | O-acetylhomoserine sulphydrylase [Termite Gut (version 3)]                                                | 1 |
| 9  | Outer membrane protein and related peptidoglycan- associated (lipo)proteins [Termite Gut (version 3)]     | 1 |
| 10 | Phosphoglyceromutase [Termite Gut (version 3)]                                                            | 1 |
| 11 | Phosphoserine aminotransferase [Termite Gut (version 3)]                                                  | 1 |
| 12 | Protease subunit of ATP-dependent Clp proteases [Termite Gut (version 3)]                                 | 1 |
| 13 | Response regulator containing a CheY-like receive r domain and an HD-GYP domain [Termite Gut (version 3)] | 1 |
| 14 | Ribosomal protein L7/L12 [Termite Gut (version 3)]                                                        | 1 |
| 15 | Ribosomal protein S19 [Termite Gut (version 3)]                                                           | 1 |
| 16 | Ribosomal protein S2 [Termite Gut (version 3)]                                                            | 1 |
| 17 | Ribosomal protein S3 [Termite Gut (version 3)]                                                            | 1 |
| 18 | Ribosomal protein S4 and related proteins [Termite Gut (version 3)]                                       | 1 |
| 19 | Transketolase [Termite Gut (version 3)]                                                                   | 1 |

## Supplemental Table. Cell Motility

| Protein Name                                                                                     | Proteomic analysis <sup>§</sup> | Pfam HMM name (Accession Number)                                                         | Enzyme Classification (Proteomic <sup>§</sup> /Genomic) <sup>‡</sup> | COG                |
|--------------------------------------------------------------------------------------------------|---------------------------------|------------------------------------------------------------------------------------------|----------------------------------------------------------------------|--------------------|
| Chemotaxis protein histidine kinase and related kinases                                          | 8                               | CheW (PF01584), Hpt (PF01627), HATPase_c (PF02518), P2 (PF07194), H-kinase_dim (PF02895) | EC:2.7.3.- (2/6)                                                     | COG0643            |
| Chemotaxis response regulator containing a CheY-like receiver domain and a methylesterase domain | 5                               | Response_reg (PF00072) & CheB_methylest (PF01339)                                        | EC:3.1.1.61 (4/10)                                                   | COG2201            |
| Chemotaxis signal transduction protein                                                           | 8                               | CheW (PF01584)                                                                           | -                                                                    | COG0835            |
| Chemotaxis signal transduction protein                                                           | 1                               | CheR (PF01739)                                                                           | -                                                                    | COG0835            |
| Methyl-accepting chemotaxis protein                                                              | 39                              | MCPsignal (PF00015), Response_reg (PF00072), HAMP (PF00672), & Cache_1 (PF02743)         | -                                                                    | COG0840            |
| Flagellar filament outer layer protein                                                           | 9                               | FlaA (PF04620)                                                                           | -                                                                    | -                  |
| Flagellar motor switch protein                                                                   | 2                               | FliG_C (PF01706) & SpoA (PF01052)                                                        | -                                                                    | COG1536<br>COG1886 |
| Flagellin and related hook-associated proteins                                                   | 49                              | Flagellin_N (PF00669) & Flagellin_C (PF00700)                                            | -                                                                    | COG1344            |

<sup>§</sup> Proteins identified which passed filtering criteria and have  $\geq 2$  peptides

<sup>‡</sup> Proteins identified with this EC number / genes identified with this EC number

**Supplemental Table. Enzyme Commission (EC) Numbers Identified in the Metaproteomic Data****EC 1 Oxidoreductases**

|    |                                                         |
|----|---------------------------------------------------------|
| 16 | EC 1.1 Acting on the CH-OH group of donors              |
| 15 | EC 1.6 Acting on NADH or NADPH                          |
| 11 | EC 1.4 Acting on the CH-NH <sub>2</sub> group of donors |
| 10 | EC 1.2 Acting on the aldehyde or oxo group of donors    |
| 6  | EC 1.3 Acting on the CH-CH group of donors              |

**EC 2 Transferases**

|    |                                                                    |
|----|--------------------------------------------------------------------|
| 37 | EC 2.7 Transferring Phosphorus-Containing Groups                   |
| 5  | EC 2.5 Transferring Alkyl or Aryl Groups, Other than Methyl Groups |
| 4  | EC 2.4 Glycosyltransferases                                        |
| 3  | EC 2.1 Transferring One-Carbon Groups                              |
| 3  | EC 2.2 Transferring Aldehyde or Ketonic Groups                     |
| 3  | EC 2.3 Acyltransferases                                            |
| 2  | EC 2.6 Transferring Nitrogenous Groups                             |

**EC 3 Hydrolases**

|                                                                                          |                                                                  |
|------------------------------------------------------------------------------------------|------------------------------------------------------------------|
| 34                                                                                       | EC 3.6 Acting on Acid Anhydrides                                 |
| (19 EC 3.6.3 Acting on acid anhydrides; catalysing transmembrane movement of substances) |                                                                  |
| (7 EC 3.6.1 In phosphorus-containing anhydrides)                                         |                                                                  |
| 7                                                                                        | EC 3.1 Acting on Ester Bonds                                     |
| 4                                                                                        | EC 3.4 Acting on peptide bonds (Peptidases)                      |
| 1                                                                                        | EC 3.3 Acting on Ether Bonds                                     |
| 1                                                                                        | EC 3.5 Acting on Carbon-Nitrogen Bonds, other than Peptide Bonds |

**EC 4 Lyases**

|    |                             |
|----|-----------------------------|
| 10 | EC 4.2 Carbon-Oxygen Lyases |
| 8  | EC 4.1 Carbon-Carbon Lyases |
| 2  | EC 4.4 Carbon-Sulfur Lyases |

**EC 5 Isomerases**

|    |                                       |
|----|---------------------------------------|
| 12 | EC 5.3 Intramolecular Oxidoreductases |
| 1  | EC 5.4 Intramolecular Transferases    |

**EC 6 Ligases**

|   |                                      |
|---|--------------------------------------|
| 4 | EC 6.1 Forming Carbon-Oxygen Bonds   |
| 3 | EC 6.3 Forming Carbon-Nitrogen Bonds |
| 1 | EC 6.2 Forming Carbon-Sulfur Bonds   |
| 1 | EC 6.4 Forming Carbon-Carbon Bonds   |

Some proteins contain more than one EC; therefore, the total number of ECs is greater than 197



**Supplemental Table. Proteins associated with the biosynthesis and degradation of polysaccharides (glucan binding)**

| Protein Name                                  | Proteomic analysis <sup>§</sup><br>(possible genes) | Pfam HMM name (Accession<br>Number)                                   | Enzyme Classification | COG     | TIGR                   | CAZy                         | Known Activities                                                                                                                                           |
|-----------------------------------------------|-----------------------------------------------------|-----------------------------------------------------------------------|-----------------------|---------|------------------------|------------------------------|------------------------------------------------------------------------------------------------------------------------------------------------------------|
| 4-alpha-glucanotransferase                    | 3 (30)                                              | Glyco_hydro_77 (PF02446)                                              |                       | COG1640 |                        | GH77                         | Transfer a segment of a (1,4)-alpha-D-glucan to a new 4-position in an acceptor, which may be glucose or (1,4)-alpha-D-glucan                              |
| alpha-glucan phosphorylases                   | 10 (31)                                             | Phosphorylase (PF00343)                                               | EC:2.4.1.1            | COG0058 | TIGR02094              | GT35                         | The members of this family catalyse the formation of glucose 1-phosphate from one of the following polyglucoses; glycogen, starch, glucan or maltodextrin. |
| ADP-glucose pyrophosphorylase                 | 3 (7)                                               | NTP_transferase (PF00483)                                             | EC:2.7.7.27           | COG0448 | TIGR02091              |                              | This enzyme also known as, Glucose-1-phosphate adenyltransferase, appears in variants of glycogen synthesis pathways that use ADP-glucose                  |
| Cellobiose phosphorylase                      | 2 (15)                                              | Glyco_transf_36 (PF06165),<br>CBM_X (PF06204), & GT36_AF<br>(PF06205) | EC:2.4.1.-            | COG3459 |                        | GH94<br>(previously<br>GT36) | cellobiose phosphorylase, cellodextrin phosphorylase, chitobiose phosphorylase (β-1,4 linkage)                                                             |
| UDP-3-0-acyl N-acetylglucosamine deacetylase  | 1 (1)                                               | LpxC (PF03331) & FabA<br>(PF07977)                                    | EC:3.5.1.-            | COG0774 | TIGR00325<br>TIGR01750 | CE11                         | Biosynthesis and degradation of surface polysaccharides and lipopolysaccharides (cell wall)                                                                |
| Glycosyl Hydrolase Family 3 C Terminal Domain | 1 (22)                                              | Glyco_hydro_3_C (PF01915)                                             |                       |         |                        |                              | Maybe involve in binding beta-glucan                                                                                                                       |
| Carbohydrate-Binding domain 11                | 2 (2)                                               | CBM_11 (PF03425)                                                      |                       | COG3534 |                        | CB11                         | Glucan-Binding                                                                                                                                             |

<sup>§</sup> Proteins identified which passed filtering criteria and have ≥ 2 peptides

### Supplemental Table. Transport Proteins

| Enzyme Activity                            | Enzyme Classification (Proteomic/Genomic) <sup>‡</sup> |
|--------------------------------------------|--------------------------------------------------------|
| Monosaccharide-transporting ATPase         | EC:3.6.3.17 (1/6)                                      |
| Glycerol-3-phosphate-transporting ATPase   | EC:3.6.3.20 (2/3)                                      |
| Sugar Phosphotransferase                   | EC:2.7.1.69 (1/10)                                     |
| Phosphate-transporting ATPase              | EC:3.6.3.27 (1/15 EC:3.6.3.27 COG1117 genes)           |
| Domains associated with transport          | Proteomic analysis <sup>§</sup>                        |
| SBP_bac_1 (PF01547)                        | 18                                                     |
| ABC_tran (PF00005)                         | 7                                                      |
| TOBE_2 (PF08402) & TOBE (PF03459)          | 6                                                      |
| PTS_EIIA_2 (PF00359)                       | 2                                                      |
| ABC-type xylose transport system (COG4213) | 11 (17 genes)                                          |
| PhoU (PF01895)                             | 1 (14 genes)                                           |
| ANF_receptor (PF01094)                     | 4 (22 genes)                                           |
| SBP_bac_5 (PF00496)                        | 5                                                      |
| Ammonium_transp (PF00909)                  | 5                                                      |
| Bmp (PF02608)                              | 5                                                      |
| OmpA (PF00691)                             | 3                                                      |

<sup>‡</sup> Proteins identified with this EC number / genes identified with this EC number

<sup>§</sup> Number of unique proteins identified which passed filtering criteria and have  $\geq 2$  peptides
